# Supplementary material for: NirD curtails the stringent response by inhibiting RelA activity in Escherichia coli
Source: eLife. 2021 Jul 29;10:e64092. doi: 10.7554/eLife.64092 (PMC8321558; doi:10.7554/eLife.64092)
Supplement: Figure 2—source data 2. — The amount of (p)ppGpp was normalized to total amount of G nucleotides observed in each sample. Total G is the sum of GTP and (p)ppGpp detected. The source data are provided for the relative levels of (p)ppGpp in Figure 2C, which are represented as the means and SDs of three independent experiments. [file elife-64092-fig2-data2.xlsx]

## Sheet: Figure 2–source data 2
Figure 2–source data 2. Quantification of (p)ppGpp
22/01/2020
	pEG25						pEG25-nirD
	0	15	30	35	45	60	0	15	30	35	45	60
GTP	2097.23	2368.47	2742.34	1936.42	1880.41	1757.14	2174.28	2590.57	2999.31	2491.82	2657.78	2826.16
ppGpp	128.78	148.31	236.09	1212.74	1429.89	1254.02	159.09	98.24	117	176.69	235.22	260.65
pppGpp	70.74	95.32	130.05	1122.37	1196.75	990.67	83.24	72.56	82.87	135.21	173.86	184.11
Blank	70.43	75.58	80.57	113.85	115.93	114.4	62.34	68.31	76.22	74.77	82.97	85.02
(p)ppGpp / Total G =((ppGpp-Blank)+(pppGpp-Blank))/((GTP-Blank)+(ppGpp-Blank)+(pppGpp-Blank))
	pEG25						pEG25-nirD
	0	15	30	35	45	60	0	15	30	35	45	60
(p)ppGpp / Total G	0.0281281	0.0387656	0.0715091	0.536239	0.575771	0.550996	0.0527675	0.0133702	0.0159669	0.0629446	0.0862826	0.0910918
05/02/2020
	pEG25						pEG25-nirD
	0	15	30	35	45	60	0	15	30	35	45	60
GTP	2014	2307.54	2393.48	1552.09	1501.79	1421.73	1799.67	2097.57	2273.13	1961.81	1966.05	2027.4
ppGpp	154.39	136.82	198.06	1010.56	1111.08	1044.29	134.31	60.12	78.87	149.19	177.29	201.07
pppGpp	70.1	83.07	100.5	933.86	987.4	853.81	60.94	42.18	48.64	102.45	124.03	131.93
Blank	53.1	60.75	70.5	101.63	99.99	94.87	48.65	52.73	56.5	59.56	64.79	68.37
(p)ppGpp / Total G =((ppGpp-Blank)+(pppGpp-Blank))/((GTP-Blank)+(ppGpp-Blank)+(pppGpp-Blank))
	pEG25						pEG25-nirD
	0	15	30	35	45	60	0	15	30	35	45	60
(p)ppGpp / Total G	0.0568923	0.0419541	0.0635184	0.545541	0.575251	0.562846	0.0529754	-0.00154774	0.0065034	0.0651278	0.0828461	0.0910597
12/07/2020
	pEG25						pEG25-nirD
	0	15	30	35	45	60	0	15	30	35	45	60
GTP	833.28	1047.61	1246.63	833.74	746.59	727.07	907.37	1205.66	1299.78	1289.13	1473	1574.83
ppGpp	78.23	66.79	104.43	482.03	515.87	479.67	89.24	44.98	48.93	55.47	86.15	96.06
pppGpp	36.41	40.75	57.88	546.14	511.23	455.1	38.47	30.18	30.33	36.22	58.13	61.81
Blank	23.07	29.16	36.78	51.85	54.21	56.3	31.27	36.61	37.29	38.51	43.85	46.58
(p)ppGpp / Total G =((ppGpp-Blank)+(pppGpp-Blank))/((GTP-Blank)+(ppGpp-Blank)+(pppGpp-Blank))
	pEG25						pEG25-nirD
	0	15	30	35	45	60	0	15	30	35	45	60
(p)ppGpp / Total G	0.0779552	0.0461004	0.0683428	0.541779	0.570233	0.550705	0.0692362	0.00165672	0.00369327	0.0115942	0.0380823	0.0406225
Means
	pEG25						pEG25-nirD
	0	15	30	35	45	60	0	15	30	35	45	60
(p)ppGpp / Total G	0.0543252	0.0422734	0.0677901	0.541186	0.573752	0.554849	0.0583264	0.00449304	0.00872119	0.0465555	0.0690703	0.074258
SDs
	pEG25						pEG25-nirD
	0	15	30	35	45	60	0	15	30	35	45	60
(p)ppGpp / Total G	0.0250125	0.00367778	0.00402388	0.0046791	0.00305801	0.0069268	0.00944876	0.00785299	0.00643035	0.0302971	0.0268914	0.0291292
