# Supplementary material for: NirD curtails the stringent response by inhibiting RelA activity in Escherichia coli
Source: eLife. 2021 Jul 29;10:e64092. doi: 10.7554/eLife.64092 (PMC8321558; doi:10.7554/eLife.64092)
Supplement: Figure 3—figure supplement 1—source data 1. — The relative β-galactosidase activity was calculated as follows:1000×Slope(ΔOD420nmΔt)V×OD600nm. Slope is estimated by linear regression, and V is the volume of culture used (in mL). The source data are provided for the bar chart showing β-galactosidase activity in Figure 3—figure supplement 1A, which is represented as the means and SDs of three independent experiments. [file elife-64092-fig3-figsupp1-data1.xlsx]

## Sheet: Fig 3–fig sup 1–source data 1
Figure 3–figure supplement 1–source data 1. Determination of β-galactosidase activity
28/08/2020
OD420nm
	Time (seconds)
	0	119.271	239.26	359.267	479.268	599.252	719.258	839.267	959.241	1079.23	1199.23	1319.22	1439.23	1559.21	1679.22
Blank	0.0998	0.0998	0.0998	0.1001	0.1001	0.1004	0.1009	0.1011	0.1016	0.1021	0.1028	0.1035	0.1044	0.1052	0.1061
Control -	0.1055	0.1049	0.105	0.1057	0.1062	0.1075	0.1087	0.1103	0.1121	0.1142	0.1166	0.1192	0.122	0.1249	0.1279
Control +	0.1511	0.1938	0.2343	0.2728	0.312	0.352	0.3907	0.4272	0.4646	0.502	0.5398	0.5775	0.615	0.6522	0.6893
NirB-NirD	0.1173	0.1273	0.1387	0.1505	0.162	0.1746	0.1876	0.201	0.215	0.2277	0.2414	0.2555	0.2701	0.2843	0.2987
NirB-NirDE50K	0.1223	0.1364	0.1505	0.1648	0.1782	0.1921	0.2068	0.2215	0.2366	0.2517	0.2665	0.2817	0.297	0.3118	0.3274
=OD420nm-OD420nm(Blank)
	Time (minutes)
	0	1.98785	3.98767	5.98778	7.9878	9.98753	11.9876	13.9878	15.9873	17.9872	19.9871	21.9871	23.9871	25.9869	27.987
Control -	0.0057	0.0051	0.0052	0.0056	0.0061	0.0071	0.0078	0.0092	0.0105	0.0121	0.0138	0.0157	0.0176	0.0197	0.0218
Control +	0.0513	0.094	0.1345	0.1727	0.2119	0.2516	0.2898	0.3261	0.363	0.3999	0.437	0.474	0.5106	0.547	0.5832
NirB-NirD	0.0175	0.0275	0.0389	0.0504	0.0619	0.0742	0.0867	0.0999	0.1134	0.1256	0.1386	0.152	0.1657	0.1791	0.1926
NirB-NirDE50K	0.0225	0.0366	0.0507	0.0647	0.0781	0.0917	0.1059	0.1204	0.135	0.1496	0.1637	0.1782	0.1926	0.2066	0.2213
								=Slope
									Slope	R2
								Control -	0.0006	0.9189
								Control +	0.0189	0.9996
								NirB-NirD	0.0063	0.9989
								NirB-NirDE50K	0.0071	0.9999
OD600nm			=10*(OD600nm-OD600nm(Blank))
Blank	0.0904
Control -	0.1998		Control -	1.094
Control +	0.3092		Control +	2.188
NirB-NirD	0.26		NirB-NirD	1.696
NirB-NirDE50K	0.2633		NirB-NirDE50K	1.729
=1000*(Slope/(0.001*(OD600nm-OD600nm(Blank))))
Control -	548.446
Control +	8638.03
NirB-NirD	3714.62
NirB-NirDE50K	4106.42
29/08/2020
OD420nm
	Time (seconds)
	0	119.272	239.282	359.27	479.253	599.258	719.264	839.264	959.253	1079.24	1199.24	1319.23	1439.23	1559.24	1679.22
Blank	0.0991	0.0993	0.0993	0.0993	0.0995	0.0998	0.1	0.1004	0.1008	0.1011	0.1015	0.1023	0.1027	0.1034	0.1041
Control -	0.106	0.1064	0.1066	0.1071	0.1078	0.1087	0.1098	0.1112	0.1128	0.1145	0.1165	0.1186	0.121	0.1236	0.1262
Control +	0.1434	0.1951	0.2463	0.2994	0.3512	0.4037	0.4561	0.5077	0.5592	0.6097	0.6606	0.7108	0.7594	0.8079	0.8546
NirB-NirD	0.1159	0.1274	0.1399	0.1522	0.1647	0.1781	0.1919	0.2064	0.2214	0.2356	0.2502	0.2648	0.2796	0.295	0.31
NirB-NirDE50K	0.1183	0.132	0.1474	0.1636	0.18	0.1977	0.2153	0.2333	0.2513	0.2689	0.2869	0.3051	0.3229	0.3411	0.3587
=OD420nm-OD420nm(Blank)
	Time (minutes)
	0	1.98787	3.98803	5.98783	7.98755	9.98763	11.9877	13.9877	15.9876	17.9873	19.9873	21.9872	23.9871	25.9873	27.987
Control -	0.0069	0.0071	0.0073	0.0078	0.0083	0.0089	0.0098	0.0108	0.012	0.0134	0.015	0.0163	0.0183	0.0202	0.0221
Control +	0.0443	0.0958	0.147	0.2001	0.2517	0.3039	0.3561	0.4073	0.4584	0.5086	0.5591	0.6085	0.6567	0.7045	0.7505
NirB-NirD	0.0168	0.0281	0.0406	0.0529	0.0652	0.0783	0.0919	0.106	0.1206	0.1345	0.1487	0.1625	0.1769	0.1916	0.2059
NirB-NirDE50K	0.0192	0.0327	0.0481	0.0643	0.0805	0.0979	0.1153	0.1329	0.1505	0.1678	0.1854	0.2028	0.2202	0.2377	0.2546
								=Slope
									Slope	R2
								Control -	0.0005	0.9337
								Control +	0.0254	0.9997
								NirB-NirD	0.0068	0.999
								NirB-NirDE50K	0.0085	0.9995
OD600nm			=10*(OD600nm-OD600nm(Blank))
Blank	0.0905
Control -	0.1991		Control -	1.086
Control +	0.3133		Control +	2.228
NirB-NirD	0.2557		NirB-NirD	1.652
NirB-NirDE50K	0.271		NirB-NirDE50K	1.805
=1000*(Slope/(0.001*(OD600nm-OD600nm(Blank))))
Control -	460.405
Control +	11400.4
NirB-NirD	4116.22
NirB-NirDE50K	4709.14
30/08/2020
OD420nm
	Time (seconds)
	0	119.276	239.266	359.267	479.267	599.275	719.282	839.262	959.258	1079.26	1199.27	1319.26	1439.25	1559.26	1679.26
Blank	0.1007	0.1007	0.1008	0.1007	0.1008	0.1009	0.1012	0.1013	0.1014	0.1017	0.102	0.1022	0.1026	0.103	0.1033
Control -	0.1076	0.1076	0.1079	0.1081	0.1083	0.1087	0.1094	0.11	0.1109	0.1118	0.1129	0.1139	0.1154	0.1169	0.1183
Control +	0.135	0.1583	0.182	0.2048	0.2278	0.2506	0.2727	0.2952	0.3179	0.3417	0.3654	0.3893	0.414	0.4385	0.4635
NirB-NirD	0.1104	0.1125	0.1151	0.118	0.1214	0.125	0.1288	0.1329	0.1372	0.1415	0.1462	0.1507	0.1558	0.1607	0.1658
NirB-NirDE50K	0.1153	0.1228	0.1304	0.1383	0.146	0.1538	0.1617	0.1699	0.1781	0.1866	0.1953	0.2039	0.2127	0.2219	0.231
=OD420nm-OD420nm(Blank)
	Time (minutes)
	0	1.98793	3.98777	5.98778	7.98778	9.98792	11.988	13.9877	15.9876	17.9876	19.9878	21.9876	23.9876	25.9876	27.9877
Control -	0.0069	0.0069	0.0071	0.0074	0.0075	0.0078	0.0082	0.0087	0.0095	0.0101	0.0109	0.0117	0.0128	0.0139	0.015
Control +	0.0343	0.0576	0.0812	0.1041	0.127	0.1497	0.1715	0.1939	0.2165	0.24	0.2634	0.2871	0.3114	0.3355	0.3602
NirB-NirD	0.0097	0.0118	0.0143	0.0173	0.0206	0.0241	0.0276	0.0316	0.0358	0.0398	0.0442	0.0485	0.0532	0.0577	0.0625
NirB-NirDE50K	0.0146	0.0221	0.0296	0.0376	0.0452	0.0529	0.0605	0.0686	0.0767	0.0849	0.0933	0.1017	0.1101	0.1189	0.1277
								=Slope
									Slope	R2
								Control -	0.0003	0.9171
								Control +	0.0115	0.9998
								NirB-NirD	0.0019	0.9916
								NirB-NirDE50K	0.004	0.0133
OD600nm			=10*(OD600nm-OD600nm(Blank))
Blank	0.0906
Control -	0.2019		Control -	1.113
Control +	0.2815		Control +	1.909
NirB-NirD	0.2169		NirB-NirD	1.263
NirB-NirDE50K	0.2463		NirB-NirDE50K	1.557
=1000*(Slope/(0.001*(OD600nm-OD600nm(Blank))))
Control -	269.542
Control +	6024.1
NirB-NirD	1504.35
NirB-NirDE50K	2569.04
Means and SDs
	Means	SDs
Control -	426.131	142.576
Control +	8687.49	2688.47
NirB-NirD	3111.73	1406.44
NirB-NirDE50K	3794.87	1103.54
