# Supplementary material for: NirD curtails the stringent response by inhibiting RelA activity in Escherichia coli
Source: eLife. 2021 Jul 29;10:e64092. doi: 10.7554/eLife.64092 (PMC8321558; doi:10.7554/eLife.64092)
Supplement: Figure 3—figure supplement 1—source data 2. — The source data are provided for the growth curves in Figure 3—figure supplement 1C, which are represented as the means and SDs of three independent experiments. [file elife-64092-fig3-figsupp1-data2.xlsx]

## Sheet: Fig 3–fig sup 1–source data 2
Figure 3–figure supplement 1–source data 2. Raw data for growth curve construction
OD600nm
		Time (hours)
		0	6	7	8	9	10	11	12	13	14	15	16	17	18	19	20	21
Replica 1	WT	0.0366667	0.06	0.07	0.0766667	0.0866667	0.1	0.11	0.13	0.156667	0.17	0.186667	0.196667	0.216667	0.233333	0.246667	0.27	0.276667
	ΔnirD	0.04	0.0533333	0.06	0.0566667	0.0616667	0.06	0.0633333	0.0633333	0.0666667	0.0666667	0.06	0.07	0.07	0.0633333	0.07	0.0733333	0.08
	nirDE50K	0.0366667	0.0633333	0.07	0.0766667	0.0866667	0.103333	0.116667	0.133333	0.156667	0.176667	0.183333	0.2	0.22	0.24	0.256667	0.276667	0.286667
Replica 2	WT	0.03	0.06	0.0633333	0.0733333	0.08	0.0933333	0.103333	0.123333	0.14	0.163333	0.18	0.193333	0.216667	0.233333	0.253333	0.266667	0.286667
	ΔnirD	0.03	0.06	0.06	0.06	0.0666667	0.0633333	0.07	0.07	0.07	0.0766667	0.0733333	0.07	0.0666667	0.07	0.0833333	0.0733333	0.0733333
	nirDE50K	0.0266667	0.0666667	0.07	0.0866667	0.0966667	0.116667	0.133333	0.153333	0.173333	0.196667	0.213333	0.233333	0.25	0.27	0.293333	0.313333	0.326667
Replica 3	WT	0.03	0.0633333	0.0633333	0.0766667	0.0833333	0.103333	0.116667	0.14	0.153333	0.17	0.19	0.206667	0.223333	0.243333	0.26	0.283333	0.283333
	ΔnirD	0.03	0.0566667	0.0533333	0.0566667	0.05	0.0533333	0.06	0.0666667	0.0633333	0.06	0.0633333	0.0666667	0.0633333	0.0666667	0.0666667	0.05	0.0566667
	nirDE50K	0.0333333	0.0566667	0.0666667	0.0766667	0.0866667	0.103333	0.116667	0.133333	0.146667	0.166667	0.186667	0.21	0.223333	0.236667	0.266667	0.28	0.266667
Means
		Time (hours)
		0	6	7	8	9	10	11	12	13	14	15	16	17	18	19	20	21
	WT	0.0322222	0.0611111	0.0655556	0.0755556	0.0833333	0.0988889	0.11	0.131111	0.15	0.167778	0.185556	0.198889	0.218889	0.236667	0.253333	0.273333	0.282222
	ΔnirD	0.0333333	0.0566667	0.0577778	0.0577778	0.0594444	0.0588889	0.0644444	0.0666667	0.0666667	0.0677778	0.0655556	0.0688889	0.0666667	0.0666667	0.0733333	0.0655556	0.07
	nirDE50K	0.0322222	0.0622222	0.0688889	0.08	0.09	0.107778	0.122222	0.14	0.158889	0.18	0.194444	0.214444	0.231111	0.248889	0.272222	0.29	0.293333
SDs
		Time (hours)
		0	6	7	8	9	10	11	12	13	14	15	16	17	18	19	20	21
	WT	0.003849	0.0019245	0.003849	0.0019245	0.00333333	0.00509175	0.00666667	0.0083887	0.00881917	0.003849	0.00509175	0.00693889	0.003849	0.0057735	0.00666667	0.00881917	0.00509175
	ΔnirD	0.0057735	0.00333333	0.003849	0.0019245	0.00855267	0.00509175	0.00509175	0.00333333	0.00333333	0.0083887	0.00693889	0.0019245	0.00333333	0.00333333	0.00881917	0.0134715	0.0120185
	nirDE50K	0.00509175	0.00509175	0.0019245	0.0057735	0.0057735	0.007698	0.0096225	0.011547	0.0134715	0.0152753	0.0164429	0.0171053	0.0164429	0.0183586	0.0189541	0.0202759	0.0305505
