# Supplementary material for: NirD curtails the stringent response by inhibiting RelA activity in Escherichia coli
Source: eLife. 2021 Jul 29;10:e64092. doi: 10.7554/eLife.64092 (PMC8321558; doi:10.7554/eLife.64092)
Supplement: Figure 3—source data 1. — The relative β-galactosidase activity was calculated as follows:1000×Slope(ΔOD420nmΔt)V×OD600nm. Slope is estimated by linear regression, and V is the volume of culture used (in mL). The source data are provided for the bar chart showing β-galactosidase activity in Figure 3A, which is represented as the means and SDs of three independent experiments. [file elife-64092-fig3-data1.xlsx]

## Sheet: Figure 3–source data 1
Figure 3–source data 1. Determination of β-galactosidase activity
21/08/2020
OD420nm
	Time (seconds)
	0	119.23	239.228	359.25	479.219	599.211	719.216	839.212	959.223	1079.21	1199.21	1319.22	1439.22	1559.21	1679.21
Blank	0.0983	0.0989	0.0982	0.0981	0.0989	0.099	0.099	0.0992	0.0995	0.1002	0.1	0.1015	0.1013	0.1018	0.1023
Control -	0.1056	0.1056	0.1059	0.1064	0.1072	0.1081	0.1093	0.1107	0.1122	0.1143	0.1162	0.1187	0.1209	0.1236	0.1264
Control +	0.1387	0.193	0.2493	0.305	0.3592	0.4142	0.4709	0.5272	0.5827	0.6379	0.6923	0.7458	0.7986	0.8498	0.9002
RelA-NirD	0.1376	0.171	0.2077	0.2442	0.2821	0.3212	0.3604	0.4	0.4392	0.4789	0.5179	0.5573	0.5965	0.6353	0.674
SpoT-NirD	0.1045	0.1047	0.1054	0.1056	0.1059	0.1065	0.1071	0.1079	0.1087	0.1099	0.111	0.1123	0.1137	0.1152	0.1168
RelA-NirDE50K	0.1042	0.1046	0.105	0.1055	0.106	0.1066	0.1074	0.1086	0.1101	0.1119	0.1137	0.1157	0.1178	0.1201	0.1227
=OD420nm-OD420nm(Blank)
	Time (minutes)
	0	1.98717	3.98713	5.9875	7.98698	9.98685	11.9869	13.9869	15.987	17.9868	19.9869	21.9871	23.987	25.9868	27.9868
Control -	0.0073	0.0067	0.0077	0.0083	0.0083	0.0091	0.0103	0.0115	0.0127	0.0141	0.0162	0.0172	0.0196	0.0218	0.0241
Control +	0.0404	0.0941	0.1511	0.2069	0.2603	0.3152	0.3719	0.428	0.4832	0.5377	0.5923	0.6443	0.6973	0.748	0.7979
RelA-NirD	0.0393	0.0721	0.1095	0.1461	0.1832	0.2222	0.2614	0.3008	0.3397	0.3787	0.4179	0.4558	0.4952	0.5335	0.5717
SpoT-NirD	0.0062	0.0058	0.0072	0.0075	0.007	0.0075	0.0081	0.0087	0.0092	0.0097	0.011	0.0108	0.0124	0.0134	0.0145
RelA-NirDE50K	0.0059	0.0057	0.0068	0.0074	0.0071	0.0076	0.0084	0.0094	0.0106	0.0117	0.0137	0.0142	0.0165	0.0183	0.0204
								=Slope
									Slope	R2
								Control -	0.0006	0.9296
								Control +	0.0273	0.9998
								RelA-NirD	0.0192	0.9998
								SpoT-NirD	0.0003	0.932
								RelA-NirDE50K	0.0005	0.9205
OD600nm			=10*(OD600nm-OD600nm(Blank))
Blank	0.0895
Control -	0.1853		Control -	0.958
Control +	0.2786		Control +	1.891
RelA-NirD	0.2779		RelA-NirD	1.884
SpoT-NirD	0.1838		SpoT-NirD	0.943
RelA-NirDE50K	0.1819		RelA-NirDE50K	0.924
=1000*(Slope/(0.001*(OD600nm-OD600nm(Blank))))
Control -	626.305
Control +	14436.8
RelA-NirD	10191.1
SpoT-NirD	318.134
RelA-NirDE50K	541.126
22/08/2020
OD420nm
	Time (seconds)
	0	119.256	239.262	359.26	479.242	599.243	719.263	839.255	959.244	1079.25	1199.25	1319.25	1439.25	1559.24	1679.25
Blank	0.098	0.0978	0.0979	0.0981	0.0982	0.0983	0.0985	0.0987	0.0989	0.0992	0.0995	0.0999	0.1004	0.101	0.1013
Control -	0.1043	0.1044	0.105	0.1056	0.1061	0.1066	0.1075	0.1083	0.1095	0.1108	0.1123	0.1139	0.1157	0.1177	0.1196
Control +	0.1301	0.1665	0.2067	0.2441	0.2809	0.3192	0.3587	0.3989	0.4402	0.482	0.5239	0.5653	0.6065	0.6475	0.688
RelA-NirD	0.1293	0.1598	0.1913	0.2246	0.2586	0.2925	0.3259	0.3599	0.3939	0.4288	0.4644	0.5	0.536	0.5723	0.6081
SpoT-NirD	0.1134	0.1134	0.1137	0.1141	0.1145	0.115	0.1154	0.1159	0.1167	0.1174	0.1183	0.1194	0.1204	0.1219	0.123
RelA-NirDE50K	0.1057	0.1057	0.1061	0.1066	0.107	0.1076	0.1081	0.1088	0.1101	0.1111	0.1125	0.1142	0.116	0.1178	0.1196
=OD420nm-OD420nm(Blank)
	Time (minutes)
	0	1.9876	3.9877	5.98767	7.98737	9.98738	11.9877	13.9876	15.9874	17.9874	19.9875	21.9875	23.9875	25.9874	27.9875
Control -	0.0063	0.0066	0.0071	0.0075	0.0079	0.0083	0.009	0.0096	0.0106	0.0116	0.0128	0.014	0.0153	0.0167	0.0183
Control +	0.0321	0.0687	0.1088	0.146	0.1827	0.2209	0.2602	0.3002	0.3413	0.3828	0.4244	0.4654	0.5061	0.5465	0.5867
RelA-NirD	0.0313	0.062	0.0934	0.1265	0.1604	0.1942	0.2274	0.2612	0.295	0.3296	0.3649	0.4001	0.4356	0.4713	0.5068
SpoT-NirD	0.0154	0.0156	0.0158	0.016	0.0163	0.0167	0.0169	0.0172	0.0178	0.0182	0.0188	0.0195	0.02	0.0209	0.0217
RelA-NirDE50K	0.0077	0.0079	0.0082	0.0085	0.0088	0.0093	0.0096	0.0101	0.0112	0.0119	0.013	0.0143	0.0156	0.0168	0.0183
								=Slope
									Slope	R2
								Control -	0.0004	0.9441
								Control +	0.0199	0.9996
								RelA-NirD	0.017	0.9997
								SpoT-NirD	0.0002	0.951
								RelA-NirDE50K	0.0004	0.9218
OD600nm			=10*(OD600nm-OD600nm(Blank))
Blank	0.0913
Control -	0.194		Control -	1.027
Control +	0.2833		Control +	1.92
RelA-NirD	0.2575		RelA-NirD	1.662
SpoT-NirD	0.1855		SpoT-NirD	0.942
RelA-NirDE50K	0.1926		RelA-NirDE50K	1.013
=1000*(Slope/(0.001*(OD600nm-OD600nm(Blank))))
Control -	389.484
Control +	10364.6
RelA-NirD	10228.6
SpoT-NirD	212.314
RelA-NirDE50K	394.867
24/08/2020
OD420nm
	Time (seconds)
	0	119.198	239.164	359.167	479.169	599.169	719.175	839.171	959.162	1079.17	1199.17	1319.14	1439.14	1559.15	1679.15
Blank	0.0987	0.0987	0.0987	0.0989	0.099	0.099	0.0993	0.0995	0.0997	0.1	0.1003	0.1008	0.1013	0.1017	0.1023
Control -	0.1056	0.1057	0.1062	0.1066	0.1072	0.1081	0.1091	0.1103	0.1118	0.1131	0.1148	0.1169	0.119	0.121	0.1236
Control +	0.1343	0.1806	0.2272	0.2741	0.3207	0.3671	0.4138	0.4609	0.5072	0.5524	0.5979	0.6439	0.6885	0.7324	0.7753
RelA-NirD	0.1176	0.1384	0.1608	0.1846	0.21	0.2359	0.2628	0.2904	0.3182	0.3465	0.375	0.4042	0.4338	0.4631	0.4921
SpoT-NirD	0.1049	0.105	0.1051	0.1052	0.1057	0.106	0.1064	0.1069	0.1076	0.1083	0.1091	0.1102	0.1112	0.1119	0.1129
RelA-NirDE50K	0.1029	0.1036	0.1037	0.1043	0.1045	0.1049	0.1058	0.1063	0.107	0.1077	0.1082	0.1101	0.1114	0.1127	0.1139
=OD420nm-OD420nm(Blank)
	Time (minutes)
	0	1.98663	3.98607	5.98612	7.98615	9.98615	11.9863	13.9862	15.986	17.9862	19.9862	21.9857	23.9857	25.9859	27.9859
Control -	0.0069	0.007	0.0075	0.0077	0.0082	0.0091	0.0098	0.0108	0.0121	0.0131	0.0145	0.0161	0.0177	0.0193	0.0213
Control +	0.0356	0.0819	0.1285	0.1752	0.2217	0.2681	0.3145	0.3614	0.4075	0.4524	0.4976	0.5431	0.5872	0.6307	0.673
RelA-NirD	0.0189	0.0397	0.0621	0.0857	0.111	0.1369	0.1635	0.1909	0.2185	0.2465	0.2747	0.3034	0.3325	0.3614	0.3898
SpoT-NirD	0.0062	0.0063	0.0064	0.0063	0.0067	0.007	0.0071	0.0074	0.0079	0.0083	0.0088	0.0094	0.0099	0.0102	0.0106
RelA-NirDE50K	0.0042	0.0049	0.005	0.0054	0.0055	0.0059	0.0065	0.0068	0.0073	0.0077	0.0079	0.0093	0.0101	0.011	0.0116
								=Slope
									Slope	R2
								Control -	0.0005	0.9421
								Control +	0.0229	0.9998
								RelA-NirD	0.0134	0.9983
								SpoT-NirD	0.0002	0.9466
								RelA-NirDE50K	0.0003	0.9495
OD600nm			=10*(OD600nm-OD600nm(Blank))
Blank	0.0916
Control -	0.1956		Control -	1.04
Control +	0.291		Control +	1.994
RelA-NirD	0.2405		RelA-NirD	1.489
SpoT-NirD	0.1842		SpoT-NirD	0.926
RelA-NirDE50K	0.1907		RelA-NirDE50K	0.991
=1000*(Slope/(0.001*(OD600nm-OD600nm(Blank))))
Control -	480.769
Control +	11484.5
RelA-NirD	8999.33
SpoT-NirD	215.983
RelA-NirDE50K	302.725
Means and SDs
	Means	SDs
Control -	498.853	119.442
Control +	12095.3	2103.71
RelA-NirD	9806.35	699.154
SpoT-NirD	248.81	60.0639
RelA-NirDE50K	412.906	120.22
