# Supplementary material for: NirD curtails the stringent response by inhibiting RelA activity in Escherichia coli
Source: eLife. 2021 Jul 29;10:e64092. doi: 10.7554/eLife.64092 (PMC8321558; doi:10.7554/eLife.64092)
Supplement: Figure 3—source data 3. — The amount of (p)ppGpp was normalized to total amount of G nucleotides observed in each sample. Total G is the sum of GTP and (p)ppGpp detected. The source data are provided for the relative levels of (p)ppGpp in Figure 3D, which are represented as the means and SDs of three independent experiments. [file elife-64092-fig3-data3.xlsx]

## Sheet: Figure 3–source data 3
Figure 3–source data 3. Quantification of (p)ppGpp
20/08/2020
	pEG25-nirD						pEG25-nirDE50K
	0	15	30	35	45	60	0	15	30	35	45	60
GTP	925.18	896.31	1095.96	1548.02	2372.74	1159.97	732.07	772.49	917.46	1019.49	1189.38	1361.58
ppGpp	103.01	281.67	309.95	218.18	153.58	133.56	105.01	295.97	339.58	346.65	416.9	518.92
pppGpp	92.22	180.14	239.57	210.33	145.01	129.81	92.41	192.89	273.84	310.48	376.93	462.82
Blank	87.05	93.63	100.69	103.28	105.99	111.22	87.65	95.58	101.64	105.58	113.57	121.43
(p)ppGpp / Total G =((ppGpp-Blank)+(pppGpp-Blank))/((GTP-Blank)+(ppGpp-Blank)+(pppGpp-Blank))
	pEG25-nirD						pEG25-nirDE50K
	0	15	30	35	45	60	0	15	30	35	45	60
(p)ppGpp / Total G	0.0245909	0.254867	0.259147	0.133168	0.0368027	0.0375615	0.0331863	0.305456	0.334546	0.327948	0.345017	0.373355
21/08/2020
	pEG25-nirD						pEG25-nirDE50K
	0	15	30	35	45	60	0	15	30	35	45	60
GTP	892.24	730.09	890.4	1211.76	1632.56	863.63	529.93	381.86	492.39	481.7	623.78	689.1
ppGpp	31.82	174.95	202.39	113.21	64.49	49.12	20.47	119.1	158.75	141.88	195.74	239.19
pppGpp	16.82	84.6	134.84	93.68	49.34	39.9	11.61	64.86	118.9	122.86	175.37	223.94
Blank	15.9	20.31	24.37	24.19	27.24	29.93	11.16	13.29	16.37	16.93	20.55	24.26
(p)ppGpp / Total G =((ppGpp-Blank)+(pppGpp-Blank))/((GTP-Blank)+(ppGpp-Blank)+(pppGpp-Blank))
	pEG25-nirD						pEG25-nirDE50K
	0	15	30	35	45	60	0	15	30	35	45	60
(p)ppGpp / Total G	0.018854	0.235736	0.249879	0.117757	0.0356527	0.0337946	0.0184663	0.29923	0.339714	0.331891	0.353618	0.384094
22/08/2020
	pEG25-nirD						pEG25-nirDE50K
	0	15	30	35	45	60	0	15	30	35	45	60
GTP	568.5	394.16	562.17	671.13	1273.83	475.56	523.7	398.89	549.97	630	750.2	862.9
ppGpp	20.85	120.64	158.24	78.62	53.15	41.16	21.32	138.47	177.96	191.88	233.55	286.28
pppGpp	12.85	47.6	92.14	58.36	38.07	31.71	13.55	56.53	106.94	131.25	170.83	228.8
Blank	13.09	16.63	21.07	19.72	22.81	25.92	12.31	17.98	21.61	22.95	26.95	30.31
(p)ppGpp / Total G =((ppGpp-Blank)+(pppGpp-Blank))/((GTP-Blank)+(ppGpp-Blank)+(pppGpp-Blank))
	pEG25-nirD						pEG25-nirDE50K
	0	15	30	35	45	60	0	15	30	35	45	60
(p)ppGpp / Total G	0.0133587	0.26337	0.277898	0.130236	0.0351684	0.044681	0.0196496	0.294546	0.313854	0.313509	0.326414	0.353102
Means
	pEG25-nirD						pEG25-nirDE50K
	0	15	30	35	45	60	0	15	30	35	45	60
(p)ppGpp / Total G	0.0189345	0.251324	0.262308	0.127054	0.0358746	0.038679	0.0237674	0.299744	0.329371	0.324449	0.341683	0.370183
SDs
	pEG25-nirD						pEG25-nirDE50K
	0	15	30	35	45	60	0	15	30	35	45	60
(p)ppGpp / Total G	0.00561656	0.0141539	0.0142746	0.00818366	0.000839457	0.00552857	0.00817844	0.00547298	0.0136847	0.00967741	0.0139051	0.0157373
