# Supplementary material for: NirD curtails the stringent response by inhibiting RelA activity in Escherichia coli
Source: eLife. 2021 Jul 29;10:e64092. doi: 10.7554/eLife.64092 (PMC8321558; doi:10.7554/eLife.64092)
Supplement: Figure 3—source data 4. — The Δ(lag phase) corresponds to the time that separates the growth recovery of the wild-type (WT) (lag phase [WT]) from that of the ΔnirD or nirDE50K (lag phase [ΔnirD, nirDE50K]). For each strain, the duration of the lag phase was calculated for an OD600nm corresponding to the entry into the exponential growth phase. The equation for this calculation was estimated by linear regression on the log phase of each growth curve. The source data are provided for the Δ(lag phase) in Figure 3E, which are represented as the means and SDs of at least three experiments. [file elife-64092-fig3-data4.xlsx]

## Sheet: Figure 3–source data 4. Left
Figure 3–source data 4. Determination of the Δ(lag phase)_Left panel
OD600nm
		Time (hours)
		0	6	7	8	9	10	11	12	13	14	15	16	17	18	19	20
Replica 1	WT	0.04	0.0733333	0.09	0.116667	0.15	0.216667	0.293333	0.4	0.536667	0.683333	0.833333	0.986667	1.08	1.16	1.21333	1.15
	ΔnirD	0.0466667	0.0733333	0.08	0.0933333	0.116667	0.17	0.233333	0.336667	0.466667	0.6	0.756667	0.896667	1.01333	1.09667	1.18	1.2
	nirDE50K	0.0433333	0.0733333	0.0833333	0.103333	0.14	0.203333	0.29	0.403333	0.533333	0.686667	0.843333	0.983333	1.09	1.17667	1.24333	1.18333
Replica 2	WT	0.04	0.0766667	0.0933333	0.116667	0.166667	0.233333	0.32	0.44	0.59	0.703333	0.843333	0.976667	1.06333	1.13667	1.19333	1.14667
	ΔnirD	0.0466667	0.08	0.0933333	0.12	0.156667	0.22	0.31	0.42	0.573333	0.706667	0.853333	1	1.10667	1.18667	1.25333	1.20333
	nirDE50K	0.0366667	0.07	0.08	0.0966667	0.126667	0.183333	0.263333	0.37	0.53	0.633333	0.786667	0.923333	1.03	1.12	1.19333	1.19333
Replica 3	WT	0.04	0.0633333	0.07	0.0733333	0.1	0.133333	0.19	0.27	0.39	0.513333	0.693333	0.86	0.996667	1.10667	1.19667	1.23667
	ΔnirD	0.0466667	0.0633333	0.07	0.0766667	0.09	0.12	0.16	0.243333	0.34	0.433333	0.633333	0.73	0.876667	0.99	1.09667	1.17667
	nirDE50K	0.04	0.0666667	0.0733333	0.08	0.103333	0.14	0.203333	0.29	0.396667	0.533333	0.693333	0.846667	0.956667	1.06	1.13667	1.19667
=LOG10(OD600nm)
		Time (hours)
		0	6	7	8	9	10	11	12	13	14	15	16	17	18	19	20
Replica 1	WT	-1.39794	-1.1347	-1.04576	-0.933053	-0.823909	-0.664208	-0.532639	-0.39794	-0.270295	-0.165367	-0.0791812	-0.00582954	0.0334238	0.064458	0.0839801	0.0606978
	ΔnirD	-1.33099	-1.1347	-1.09691	-1.02996	-0.933053	-0.769551	-0.632023	-0.4728	-0.330993	-0.221849	-0.121095	-0.047369	0.00575233	0.0400746	0.071882	0.0791812
	nirDE50K	-1.36318	-1.1347	-1.07918	-0.98576	-0.853872	-0.691791	-0.537602	-0.394336	-0.273001	-0.163254	-0.0740007	-0.00729924	0.0374265	0.0706535	0.0945876	0.0731071
Replica 2	WT	-1.39794	-1.11539	-1.02996	-0.933053	-0.778151	-0.632023	-0.49485	-0.356547	-0.229148	-0.152839	-0.0740007	-0.0102536	0.0266694	0.0556331	0.0767618	0.0594372
	ΔnirD	-1.33099	-1.09691	-1.02996	-0.920819	-0.805023	-0.657577	-0.508638	-0.376751	-0.241593	-0.150785	-0.0688813	0	0.0440168	0.0743287	0.0980666	0.0803859
	nirDE50K	-1.43573	-1.1549	-1.09691	-1.01472	-0.897338	-0.736759	-0.579494	-0.431798	-0.275724	-0.198368	-0.104209	-0.0346415	0.0128372	0.049218	0.0767618	0.0767618
Replica 3	WT	-1.39794	-1.19837	-1.1549	-1.1347	-1	-0.875061	-0.721246	-0.568636	-0.408935	-0.289601	-0.159058	-0.0655015	-0.00145007	0.0440168	0.0779732	0.0922527
	ΔnirD	-1.33099	-1.19837	-1.1549	-1.11539	-1.04576	-0.920819	-0.79588	-0.613798	-0.468521	-0.363178	-0.198368	-0.136677	-0.0571655	-0.00436481	0.0400746	0.0706535
	nirDE50K	-1.39794	-1.17609	-1.1347	-1.09691	-0.98576	-0.853872	-0.691791	-0.537602	-0.401574	-0.273001	-0.159058	-0.0722875	-0.0192394	0.0253059	0.0556331	0.0779732
Linear regression on the log phase
		Time (hours)
		0	6	7	8	9	10	11	12	13	14	15	16	17	18	19	20
Replica 1	WT					-0.823909	-0.664208	-0.532639	-0.39794	-0.270295
	ΔnirD					-0.933053	-0.769551	-0.632023	-0.4728	-0.330993	-0.221849
	nirDE50K					-0.853872	-0.691791	-0.537602	-0.394336	-0.273001
Replica 2	WT				-0.933053	-0.778151	-0.632023	-0.49485	-0.356547	-0.229148
	ΔnirD					-0.805023	-0.657577	-0.508638	-0.376751	-0.241593
	nirDE50K					-0.897338	-0.736759	-0.579494	-0.431798	-0.275724
Replica 3	WT						-0.875061	-0.721246	-0.568636	-0.408935	-0.289601
	ΔnirD							-0.79588	-0.613798	-0.468521	-0.363178	-0.198368
	nirDE50K						-0.853872	-0.691791	-0.537602	-0.401574	-0.273001
								Equation
										Equation				R2
								Replica 1	WT	y =	0.1373	x +	-2.0486	0.9982
									ΔnirD	y =	0.1437	x +	-2.2131	0.997
									nirDE50K	y =	0.1459	x +	-2.1552	0.997
								Replica 2	WT	y =	0.1406	x +	-2.0471	0.999
									ΔnirD	y =	0.1408	x +	-2.0664	0.9993
									nirDE50K	y =	0.1548	x +	-2.2872	0.9998
								Replica 3	WT	y =	0.1483	x +	-2.3526	0.9979
									ΔnirD	y =	0.1446	x +	-2.3673	0.993
									nirDE50K	y =	0.1452	x +	-2.2939	0.9975
Lag	(calculated with y = -0.8)				Δlag =Lag-Lag(WT)
		x
Replica 1	WT	9.09395			Replica 1	ΔnirD	0.739726
	ΔnirD	9.83368				nirDE50K	0.194599
	nirDE50K	9.28855			Replica 2	ΔnirD	0.124475
Replica 2	WT	8.86984				nirDE50K	0.737392
	ΔnirD	8.99432			Replica 3	ΔnirD	0.369547
	nirDE50K	9.60724				nirDE50K	-0.180751
Replica 3	WT	10.4693
	ΔnirD	10.8389
	nirDE50K	10.2886
Means and SDs
		Means	SDs
Replica 1	ΔnirD	0.411249	0.309739
	nirDE50K	0.250413	0.461609

## Sheet: Figure 3–source data 4. Right
Figure 3–source data 4. Determination of the Δ(lag phase)_Right panel
2021-04-13
OD600nm
	Time (hours)
	1	2	3	4	5.5	7	8	9.25	10	11	12	13
WT	0.08	0.0866667	0.09	0.09	0.106667	0.136667	0.186667	0.313333	0.47	0.713333	1.05667	1.32333
ΔnirD	0.0833333	0.0866667	0.09	0.09	0.0966667	0.11	0.12	0.16	0.203333	0.293333	0.473333	0.7
=LOG10(OD600nm)
	Time (hours)
	1	2	3	4	5.5	7	8	9.25	10	11	12	13
WT	-1.09691	-1.06215	-1.04576	-1.04576	-0.971971	-0.864337	-0.728933	-0.503993	-0.327902	-0.146707	0.023938	0.121669
ΔnirD	-1.07918	-1.06215	-1.04576	-1.04576	-1.01472	-0.958607	-0.920819	-0.79588	-0.691791	-0.532639	-0.324833	-0.154902
Linear regression on the log phase
	Time (hours)
	1	2	3	4	5.5	7	8	9.25	10	11	12	13
WT						-0.864337	-0.728933	-0.503993	-0.327902	-0.146707
ΔnirD								-0.79588	-0.691791	-0.532639	-0.324833	-0.154902
								Equation
									Equation				R2
								WT	y =	0.183	x +	-2.1703	0.9938
								ΔnirD	y =	0.174	x +	-2.423	0.9961
Lag	(calculated with y = -0.8)				Δlag =Lag-Lag(WT)
	x
WT	7.48798				ΔnirD	1.83961
ΔnirD	9.32759
2021-04-29
OD600nm
	Time (minutes)
	0	376	434	496	561	617	675	760	817	877	942	1001	1056	1117
WT	0.0433333	0.06	0.06	0.07	0.0766667	0.09	0.116667	0.206667	0.346667	0.54	0.78	0.986667	1.13667	1.20333
ΔnirD	0.0633333	0.08	0.0833333	0.08	0.09	0.09	0.0933333	0.11	0.136667	0.176667	0.26	0.396667	0.563333	0.74
nirDE50K	0.0333333	0.0433333	0.0466667	0.0466667	0.05	0.0566667	0.0666667	0.0933333	0.13	0.196667	0.323333	0.503333	0.693333	0.836667
=LOG10(OD600nm)
	Time (hours)
	0	6.26667	7.23333	8.26667	9.35	10.2833	11.25	12.6667	13.6167	14.6167	15.7	16.6833	17.6	18.6167
WT	-1.36318	-1.22185	-1.22185	-1.1549	-1.11539	-1.04576	-0.933053	-0.68473	-0.460088	-0.267606	-0.107905	-0.00582954	0.0556331	0.0803859
ΔnirD	-1.19837	-1.09691	-1.07918	-1.09691	-1.04576	-1.04576	-1.02996	-0.958607	-0.864337	-0.752845	-0.585027	-0.401574	-0.249235	-0.130768
nirDE50K	-1.47712	-1.36318	-1.33099	-1.33099	-1.30103	-1.24667	-1.17609	-1.02996	-0.886057	-0.706269	-0.49035	-0.298144	-0.159058	-0.0774475
Linear regression on the log phase
	Time (hours)
	0	6.26667	7.23333	8.26667	9.35	10.2833	11.25	12.6667	13.6167	14.6167	15.7	16.6833	17.6	18.6167
WT							-0.933053	-0.68473	-0.460088	-0.267606	-0.107905
ΔnirD									-0.864337	-0.752845	-0.585027	-0.401574	-0.249235
nirDE50K									-0.886057	-0.706269	-0.49035	-0.298144
								Equation
									Equation				R2
								WT	y =	0.1903	x +	-3.073	0.9953
								ΔnirD	y =	0.1574	x +	-3.0335	0.9928
								nirDE50K	y =	0.1925	x +	-3.513	0.9995
Lag	(calculated with y = -0.8)				Δlag =Lag-Lag(WT)
	x
WT	11.9443				ΔnirD	2.24566
ΔnirD	14.19				nirDE50K	2.14921
nirDE50K	14.0935
2021-05-03
OD600nm
		Time (hours)
		0	6	7	8	9	10	11	12	13	14	15	16	17	18	19	20
Replica 1	WT	0.05	0.06	0.0733333	0.08	0.103333	0.126667	0.183333	0.28	0.5	0.71	0.963333	1.17667	1.32667	1.43667	1.36667	1.27667
	ΔnirD	0.04	0.05	0.05	0.0533333	0.0566667	0.0633333	0.07	0.0733333	0.1	0.14	0.203333	0.356667	0.56	0.8	1.00333	1.16
	nirDE50K	0.0433333	0.0533333	0.05	0.0566667	0.0633333	0.0766667	0.0866667	0.12	0.186667	0.293333	0.466667	0.726667	0.946667	1.13	1.26667	1.36667
Replica 2	WT	0.0466667	0.0466667	0.05	0.0566667	0.0566667	0.0633333	0.09	0.18	0.296667	0.51	0.793333	1.03667	1.19333	1.33667	1.42333	1.34667
	ΔnirD	0.0466667	0.0466667	0.05	0.0533333	0.0566667	0.0566667	0.0666667	0.0733333	0.0866667	0.09	0.116667	0.17	0.256667	0.416667	0.636667	0.863333
	nirDE50K	0.0466667	0.0566667	0.06	0.0666667	0.0733333	0.0833333	0.1	0.126667	0.19	0.316667	0.576667	0.766667	1.03	1.19	1.31	1.39333
Replica 3	WT	0.0433333	0.0533333	0.0633333	0.0633333	0.0733333	0.0766667	0.106667	0.203333	0.316667	0.536667	0.75	1.03	1.14333	1.28333	1.38333	1.36333
	ΔnirD	0.04	0.0533333	0.0533333	0.0566667	0.0633333	0.0666667	0.08	0.1	0.116667	0.193333	0.336667	0.513333	0.846667	1.05	1.20667	1.32333
	nirDE50K	0.0433333	0.0566667	0.06	0.0666667	0.0766667	0.09	0.1	0.11	0.18	0.293333	0.506667	0.763333	1.22667	1.42	1.45333	1.35667
=LOG10(OD600nm)
		Time (hours)
		0	6	7	8	9	10	11	12	13	14	15	16	17	18	19	20
Replica 1	WT	-1.30103	-1.22185	-1.1347	-1.09691	-0.98576	-0.897338	-0.736759	-0.552842	-0.30103	-0.148742	-0.0162234	0.0706535	0.122762	0.157356	0.135663	0.106078
	ΔnirD	-1.39794	-1.30103	-1.30103	-1.273	-1.24667	-1.19837	-1.1549	-1.1347	-1	-0.853872	-0.691791	-0.447737	-0.251812	-0.09691	0.00144524	0.064458
	nirDE50K	-1.36318	-1.273	-1.30103	-1.24667	-1.19837	-1.11539	-1.06215	-0.920819	-0.728933	-0.532639	-0.330993	-0.138665	-0.0238029	0.0530784	0.102662	0.135663
Replica 2	WT	-1.33099	-1.33099	-1.30103	-1.24667	-1.24667	-1.19837	-1.04576	-0.744727	-0.527731	-0.29243	-0.100544	0.0156391	0.0767618	0.126023	0.153307	0.12926
	ΔnirD	-1.33099	-1.33099	-1.30103	-1.273	-1.24667	-1.24667	-1.17609	-1.1347	-1.06215	-1.04576	-0.933053	-0.769551	-0.590631	-0.380211	-0.196088	-0.0638215
	nirDE50K	-1.33099	-1.24667	-1.22185	-1.17609	-1.1347	-1.07918	-1	-0.897338	-0.721246	-0.499398	-0.239075	-0.115393	0.0128372	0.075547	0.117271	0.144055
Replica 3	WT	-1.36318	-1.273	-1.19837	-1.19837	-1.1347	-1.11539	-0.971971	-0.691791	-0.499398	-0.270295	-0.124939	0.0128372	0.0581729	0.108339	0.140927	0.134602
	ΔnirD	-1.39794	-1.273	-1.273	-1.24667	-1.19837	-1.17609	-1.09691	-1	-0.933053	-0.713693	-0.4728	-0.289601	-0.0722875	0.0211893	0.0815873	0.121669
	nirDE50K	-1.36318	-1.24667	-1.22185	-1.17609	-1.11539	-1.04576	-1	-0.958607	-0.744727	-0.532639	-0.295278	-0.117286	0.0887266	0.152288	0.162365	0.132473
=MOYENNE(LOG10(OD600nm))
		Time (hours)
		0	6	7	8	9	10	11	12	13	14	15	16	17	18	19	20
	WT	-1.33173	-1.27528	-1.21137	-1.18065	-1.12238	-1.07037	-0.918162	-0.66312	-0.44272	-0.237156	-0.0805688	0.0330433	0.0858988	0.130573	0.143299	0.123313
	ΔnirD	-1.37562	-1.30167	-1.29169	-1.26422	-1.23057	-1.20704	-1.14263	-1.0898	-0.9984	-0.871108	-0.699215	-0.502296	-0.30491	-0.151977	-0.0376851	0.0407686
	nirDE50K	-1.35245	-1.25545	-1.24824	-1.19962	-1.14949	-1.08011	-1.02072	-0.925588	-0.731636	-0.521558	-0.288449	-0.123781	0.0259203	0.0936379	0.127433	0.137397
Linear regression on the log phase
		Time (hours)
		0	6	7	8	9	10	11	12	13	14	15	16	17	18	19	20
	WT							-0.918162	-0.66312	-0.44272	-0.237156
	ΔnirD										-0.871108	-0.699215	-0.502296	-0.30491
	nirDE50K								-0.925588	-0.731636	-0.521558	-0.288449
								Equation
									Equation				R2
								WT	y =	0.2263	x +	-3.3946	0.9975
								ΔnirD	y =	0.1896	x +	-3.5324	0.9989
								nirDE50K	y =	0.2121	x +	-3.4808	0.9983
Lag	(calculated with y = -0.8)				Δlag =Lag-Lag(WT)
	x
WT	11.4653				ΔnirD	2.94608
ΔnirD	14.4114				nirDE50K	1.17401
nirDE50K	12.6393
2021-05-31
OD600nm
	Time (hours)
	0	6	7	8	9	10	11	12	13	14	15	16	17	18	19	20	21	22
WT	0.04	0.0533333	0.05	0.0566667	0.06	0.0566667	0.06	0.07	0.09	0.12	0.18	0.266667	0.406667	0.606667	0.81	0.926667	1.09667	1.25667
ΔnirD	0.05	0.0466667	0.05	0.0533333	0.0533333	0.0566667	0.06	0.06	0.06	0.07	0.08	0.1	0.143333	0.236667	0.406667	0.606667	0.82	1.01
nirDE50K	0.0333333	0.0533333	0.0433333	0.0466667	0.0433333	0.0433333	0.0533333	0.0533333	0.0566667	0.0666667	0.07	0.0866667	0.126667	0.206667	0.34	0.5	0.703333	0.9
=LOG10(OD600nm)
	Time (hours)
	0	6	7	8	9	10	11	12	13	14	15	16	17	18	19	20	21	22
WT	-1.39794	-1.273	-1.30103	-1.24667	-1.22185	-1.24667	-1.22185	-1.1549	-1.04576	-0.920819	-0.744727	-0.574031	-0.390761	-0.21705	-0.091515	-0.0330765	0.0400746	0.0992201
ΔnirD	-1.30103	-1.33099	-1.30103	-1.273	-1.273	-1.24667	-1.22185	-1.22185	-1.22185	-1.1549	-1.09691	-1	-0.843653	-0.625863	-0.390761	-0.21705	-0.0861861	0.00432137
nirDE50K	-1.47712	-1.273	-1.36318	-1.33099	-1.36318	-1.36318	-1.273	-1.273	-1.24667	-1.17609	-1.1549	-1.06215	-0.897338	-0.68473	-0.468521	-0.30103	-0.152839	-0.0457575
Linear regression on the log phase
	Time (hours)
	0	6	7	8	9	10	11	12	13	14	15	16	17	18	19	20	21	22
WT										-0.920819	-0.744727	-0.574031	-0.390761	-0.21705
ΔnirD													-0.843653	-0.625863	-0.390761	-0.21705
nirDE50K													-0.897338	-0.68473	-0.468521	-0.30103
								Equation
									Equation				R2
								WT	y =	0.1762	x +	-3.3879	0.9999
								ΔnirD	y =	0.2115	x +	-4.4319	0.9965
								nirDE50K	y =	0.2005	x +	-4.2974	0.9968
Lag	(calculated with y = -0.8)				Δlag =Lag-Lag(WT)
	x
WT	14.6873				ΔnirD	2.48482
ΔnirD	17.1721				nirDE50K	2.7561
nirDE50K	17.4434
Means and SDs
		Means	SDs
Replica 1	ΔnirD	2.37904	0.462421
	nirDE50K	2.02644	0.79816
