# Supplementary material for: NirD curtails the stringent response by inhibiting RelA activity in Escherichia coli
Source: eLife. 2021 Jul 29;10:e64092. doi: 10.7554/eLife.64092 (PMC8321558; doi:10.7554/eLife.64092)
Supplement: Figure 4—figure supplement 1—source data 1. — The relative β-galactosidase activity was calculated as follows:1000×Slope(ΔOD420nmΔt)V×OD600nm. Slope is estimated by linear regression, and V is the volume of culture used (in mL). The source data are provided for the bar chart showing β-galactosidase activity in Figure 4—figure supplement 1A, which is represented as the means and SDs of three independent experiments. [file elife-64092-fig4-figsupp1-data1.xlsx]

## Sheet: Fig 4–fig sup 1–source data 1
Figure 4–figure supplement 1–source data 1. Determination of β-galactosidase activity
28/08/2020
OD420nm
	Time (seconds)
	0	119.271	239.26	359.267	479.268	599.252	719.258	839.267	959.241	1079.23	1199.23	1319.22	1439.23	1559.21	1679.22
Blank	0.0998	0.0998	0.0998	0.1001	0.1001	0.1004	0.1009	0.1011	0.1016	0.1021	0.1028	0.1035	0.1044	0.1052	0.1061
Control -	0.1055	0.1049	0.105	0.1057	0.1062	0.1075	0.1087	0.1103	0.1121	0.1142	0.1166	0.1192	0.122	0.1249	0.1279
Control +	0.1511	0.1938	0.2343	0.2728	0.312	0.352	0.3907	0.4272	0.4646	0.502	0.5398	0.5775	0.615	0.6522	0.6893
RelAN-terminal-NirD	0.1403	0.174	0.208	0.243	0.2787	0.3146	0.3501	0.3852	0.4205	0.4564	0.4915	0.5262	0.5602	0.5931	0.6255
SpoTN-terminal-NirD	0.107	0.1074	0.1073	0.1073	0.1072	0.1079	0.1085	0.1089	0.1096	0.1103	0.111	0.1119	0.1127	0.1139	0.115
RelAN-terminal-NirDE50K	0.1053	0.1055	0.1057	0.1062	0.1063	0.1067	0.1075	0.1082	0.11	0.11	0.1112	0.1125	0.114	0.1155	0.1171
=OD420nm-OD420nm(Blank)
	Time (minutes)
	0	1.98785	3.98767	5.98778	7.9878	9.98753	11.9876	13.9878	15.9873	17.9872	19.9871	21.9871	23.9871	25.9869	27.987
Control -	0.0057	0.0051	0.0052	0.0056	0.0061	0.0071	0.0078	0.0092	0.0105	0.0121	0.0138	0.0157	0.0176	0.0197	0.0218
Control +	0.0513	0.094	0.1345	0.1727	0.2119	0.2516	0.2898	0.3261	0.363	0.3999	0.437	0.474	0.5106	0.547	0.5832
RelAN-terminal-NirD	0.0405	0.0742	0.1082	0.1429	0.1786	0.2142	0.2492	0.2841	0.3189	0.3543	0.3887	0.4227	0.4558	0.4879	0.5194
SpoTN-terminal-NirD	0.0072	0.0076	0.0075	0.0072	0.0071	0.0075	0.0076	0.0078	0.008	0.0082	0.0082	0.0084	0.0083	0.0087	0.0089
RelAN-terminal-NirDE50K	0.0055	0.0057	0.0059	0.0061	0.0062	0.0063	0.0066	0.0071	0.0084	0.0079	0.0084	0.009	0.0096	0.0103	0.011
								=Slope
									Slope	R2
								Control -	0.0006	0.9189
								Control +	0.0189	0.9996
								RelAN-terminal-NirD	0.0173	0.9998
								SpoTN-terminal-NirD	6e-05	0.8591
								RelAN-terminal-NirDE50K	0.0002	0.9382
OD600nm			=10*(OD600nm-OD600nm(Blank))
Blank	0.0904
Control -	0.1998		Control -	1.094
Control +	0.3092		Control +	2.188
RelAN-terminal-NirD	0.3103		RelAN-terminal-NirD	2.199
SpoTN-terminal-NirD	0.2033		SpoTN-terminal-NirD	1.129
RelAN-terminal-NirDE50K	0.1867		RelAN-terminal-NirDE50K	0.963
=1000*(Slope/(0.001*(OD600nm-OD600nm(Blank))))
Control -	548.446
Control +	8638.03
RelAN-terminal-NirD	7867.21
SpoTN-terminal-NirD	53.1444
RelAN-terminal-NirDE50K	207.684
29/08/2020
OD420nm
	Time (seconds)
	0	119.272	239.282	359.27	479.253	599.258	719.264	839.264	959.253	1079.24	1199.24	1319.23	1439.23	1559.24	1679.22
Blank	0.0991	0.0993	0.0993	0.0993	0.0995	0.0998	0.1	0.1004	0.1008	0.1011	0.1015	0.1023	0.1027	0.1034	0.1041
Control -	0.106	0.1064	0.1066	0.1071	0.1078	0.1087	0.1098	0.1112	0.1128	0.1145	0.1165	0.1186	0.121	0.1236	0.1262
Control +	0.1434	0.1951	0.2463	0.2994	0.3512	0.4037	0.4561	0.5077	0.5592	0.6097	0.6606	0.7108	0.7594	0.8079	0.8546
RelAN-terminal-NirD	0.1341	0.1693	0.2068	0.2443	0.2816	0.3194	0.3566	0.3942	0.4325	0.4706	0.5093	0.5472	0.5838	0.6212	0.6572
SpoTN-terminal-NirD	0.1059	0.1057	0.1059	0.106	0.1065	0.1069	0.1074	0.1079	0.1087	0.1092	0.1101	0.1112	0.1121	0.1133	0.1146
RelAN-terminal-NirDE50K	0.1051	0.1054	0.1057	0.1061	0.1067	0.1073	0.1081	0.109	0.1099	0.1107	0.1117	0.1132	0.1143	0.1159	0.1173
=OD420nm-OD420nm(Blank)
	Time (minutes)
	0	1.98787	3.98803	5.98783	7.98755	9.98763	11.9877	13.9877	15.9876	17.9873	19.9873	21.9872	23.9871	25.9873	27.987
Control -	0.0069	0.0071	0.0073	0.0078	0.0083	0.0089	0.0098	0.0108	0.012	0.0134	0.015	0.0163	0.0183	0.0202	0.0221
Control +	0.0443	0.0958	0.147	0.2001	0.2517	0.3039	0.3561	0.4073	0.4584	0.5086	0.5591	0.6085	0.6567	0.7045	0.7505
RelAN-terminal-NirD	0.035	0.07	0.1075	0.145	0.1821	0.2196	0.2566	0.2938	0.3317	0.3695	0.4078	0.4449	0.4811	0.5178	0.5531
SpoTN-terminal-NirD	0.0068	0.0064	0.0066	0.0067	0.007	0.0071	0.0074	0.0075	0.0079	0.0081	0.0086	0.0089	0.0094	0.0099	0.0105
RelAN-terminal-NirDE50K	0.006	0.0061	0.0064	0.0068	0.0072	0.0075	0.0081	0.0086	0.0091	0.0096	0.0102	0.0109	0.0116	0.0125	0.0132
								=Slope
									Slope	R2
								Control -	0.0005	0.9337
								Control +	0.0254	0.9997
								RelAN-terminal-NirD	0.0186	1
								SpoTN-terminal-NirD	0.0001	0.9214
								RelAN-terminal-NirDE50K	0.0003	0.975
OD600nm			=10*(OD600nm-OD600nm(Blank))
Blank	0.0905
Control -	0.1991		Control -	1.086
Control +	0.3133		Control +	2.228
RelAN-terminal-NirD	0.3086		RelAN-terminal-NirD	2.181
SpoTN-terminal-NirD	0.2061		SpoTN-terminal-NirD	1.156
RelAN-terminal-NirDE50K	0.1978		RelAN-terminal-NirDE50K	1.073
=1000*(Slope/(0.001*(OD600nm-OD600nm(Blank))))
Control -	460.405
Control +	11400.4
RelAN-terminal-NirD	8528.2
SpoTN-terminal-NirD	86.5052
RelAN-terminal-NirDE50K	279.59
30/08/2020
OD420nm
	Time (seconds)
	0	119.276	239.266	359.267	479.267	599.275	719.282	839.262	959.258	1079.26	1199.27	1319.26	1439.25	1559.26	1679.26
Blank	0.1007	0.1007	0.1008	0.1007	0.1008	0.1009	0.1012	0.1013	0.1014	0.1017	0.102	0.1022	0.1026	0.103	0.1033
Control -	0.1076	0.1076	0.1079	0.1081	0.1083	0.1087	0.1094	0.11	0.1109	0.1118	0.1129	0.1139	0.1154	0.1169	0.1183
Control +	0.135	0.1583	0.182	0.2048	0.2278	0.2506	0.2727	0.2952	0.3179	0.3417	0.3654	0.3893	0.414	0.4385	0.4635
RelAN-terminal-NirD	0.1217	0.1344	0.1466	0.1584	0.1706	0.1833	0.1967	0.2106	0.2245	0.2391	0.254	0.269	0.2843	0.2998	0.3153
SpoTN-terminal-NirD	0.1077	0.1075	0.1076	0.1075	0.1077	0.1078	0.1079	0.1081	0.1083	0.1086	0.1093	0.1093	0.1099	0.1103	0.1109
RelAN-terminal-NirDE50K	0.1071	0.1071	0.1072	0.1075	0.1075	0.1077	0.1079	0.1081	0.1083	0.1086	0.1091	0.1094	0.1102	0.1108	0.1113
=OD420nm-OD420nm(Blank)
	Time (minutes)
	0	1.98793	3.98777	5.98778	7.98778	9.98792	11.988	13.9877	15.9876	17.9876	19.9878	21.9876	23.9876	25.9876	27.9877
Control -	0.0069	0.0069	0.0071	0.0074	0.0075	0.0078	0.0082	0.0087	0.0095	0.0101	0.0109	0.0117	0.0128	0.0139	0.015
Control +	0.0343	0.0576	0.0812	0.1041	0.127	0.1497	0.1715	0.1939	0.2165	0.24	0.2634	0.2871	0.3114	0.3355	0.3602
RelAN-terminal-NirD	0.021	0.0337	0.0458	0.0577	0.0698	0.0824	0.0955	0.1093	0.1231	0.1374	0.152	0.1668	0.1817	0.1968	0.212
SpoTN-terminal-NirD	0.007	0.0068	0.0068	0.0068	0.0069	0.0069	0.0067	0.0068	0.0069	0.0069	0.0073	0.0071	0.0073	0.0073	0.0076
RelAN-terminal-NirDE50K	0.0064	0.0064	0.0064	0.0068	0.0067	0.0068	0.0067	0.0068	0.0069	0.0069	0.0071	0.0072	0.0076	0.0078	0.008
								=Slope
									Slope	R2
								Control -	0.0003	0.9171
								Control +	0.0115	0.9998
								RelAN-terminal-NirD	0.0068	0.9981
								SpoTN-terminal-NirD	2e-05	0.5816
								RelAN-terminal-NirDE50K	5e-05	0.8629
OD600nm			=10*(OD600nm-OD600nm(Blank))
Blank	0.0906
Control -	0.2019		Control -	1.113
Control +	0.2815		Control +	1.909
RelAN-terminal-NirD	0.2522		RelAN-terminal-NirD	1.616
SpoTN-terminal-NirD	0.2027		SpoTN-terminal-NirD	1.121
RelAN-terminal-NirDE50K	0.1915		RelAN-terminal-NirDE50K	1.009
=1000*(Slope/(0.001*(OD600nm-OD600nm(Blank))))
Control -	269.542
Control +	6024.1
RelAN-terminal-NirD	4207.92
SpoTN-terminal-NirD	17.8412
RelAN-terminal-NirDE50K	49.554
Means and SDs
	Means	SDs
Control -	426.131	142.576
Control +	8687.49	2688.47
RelAN-terminal-NirD	6867.78	2327.09
SpoTN-terminal-NirD	52.4969	34.3366
RelAN-terminal-NirDE50K	178.943	117.68
