# Supplementary material for: NirD curtails the stringent response by inhibiting RelA activity in Escherichia coli
Source: eLife. 2021 Jul 29;10:e64092. doi: 10.7554/eLife.64092 (PMC8321558; doi:10.7554/eLife.64092)
Supplement: Figure 4—source data 1. — The relative β-galactosidase activity was calculated as follows:1000×Slope(ΔOD420nmΔt)V×OD600nm. Slope is estimated by linear regression, and V is the volume of culture used (in mL). The source data are provided for the bar chart showing β-galactosidase activity in Figure 4B, which is represented as the means and SDs of three independent experiments. [file elife-64092-fig4-data1.xlsx]

## Sheet: Figure 4–source data 1
Figure 4–source data 1. Determination of β-galactosidase activity
21/08/2020
OD420nm
	Time (seconds)
	0	119.23	239.228	359.25	479.219	599.211	719.216	839.212	959.223	1079.21	1199.21	1319.22	1439.22	1559.21	1679.21
Blank	0.0983	0.0989	0.0982	0.0981	0.0989	0.099	0.099	0.0992	0.0995	0.1002	0.1	0.1015	0.1013	0.1018	0.1023
Control -	0.1056	0.1056	0.1059	0.1064	0.1072	0.1081	0.1093	0.1107	0.1122	0.1143	0.1162	0.1187	0.1209	0.1236	0.1264
Control +	0.1387	0.193	0.2493	0.305	0.3592	0.4142	0.4709	0.5272	0.5827	0.6379	0.6923	0.7458	0.7986	0.8498	0.9002
RelA-NirD	0.1376	0.171	0.2077	0.2442	0.2821	0.3212	0.3604	0.4	0.4392	0.4789	0.5179	0.5573	0.5965	0.6353	0.674
RelA1-663-NirD	0.1399	0.1827	0.227	0.2709	0.3151	0.3588	0.4035	0.4489	0.4933	0.5387	0.5835	0.6285	0.6733	0.7182	0.7621
RelA1-580-NirD	0.1171	0.1307	0.146	0.1621	0.1795	0.198	0.2173	0.237	0.2567	0.2774	0.2981	0.3194	0.341	0.3631	0.3855
RelA1-470-NirD	0.1343	0.172	0.2089	0.2446	0.2809	0.318	0.3553	0.3927	0.4302	0.469	0.5076	0.5464	0.5853	0.6248	0.6641
RelAN-terminal-NirD	0.127	0.1622	0.2006	0.2403	0.2808	0.322	0.3634	0.4045	0.445	0.4863	0.5272	0.5681	0.6083	0.6486	0.6892
RelA1-181-NirD	0.1046	0.1048	0.1052	0.1056	0.1061	0.1067	0.1072	0.1079	0.1085	0.1095	0.1102	0.1111	0.1118	0.1127	0.1139
RelA181-744-NirD	0.1034	0.1037	0.1041	0.1044	0.1049	0.1053	0.1057	0.1061	0.1066	0.1072	0.1077	0.1081	0.1085	0.109	0.1096
=OD420nm-OD420nm(Blank)
	Time (minutes)
	0	1.98717	3.98713	5.9875	7.98698	9.98685	11.9869	13.9869	15.987	17.9868	19.9869	21.9871	23.987	25.9868	27.9868
Control -	0.0073	0.0067	0.0077	0.0083	0.0083	0.0091	0.0103	0.0115	0.0127	0.0141	0.0162	0.0172	0.0196	0.0218	0.0241
Control +	0.0404	0.0941	0.1511	0.2069	0.2603	0.3152	0.3719	0.428	0.4832	0.5377	0.5923	0.6443	0.6973	0.748	0.7979
RelA-NirD	0.0393	0.0721	0.1095	0.1461	0.1832	0.2222	0.2614	0.3008	0.3397	0.3787	0.4179	0.4558	0.4952	0.5335	0.5717
RelA1-663-NirD	0.0416	0.0838	0.1288	0.1728	0.2162	0.2598	0.3045	0.3497	0.3938	0.4385	0.4835	0.527	0.572	0.6164	0.6598
RelA1-580-NirD	0.0188	0.0318	0.0478	0.064	0.0806	0.099	0.1183	0.1378	0.1572	0.1772	0.1981	0.2179	0.2397	0.2613	0.2832
RelA1-470-NirD	0.036	0.0731	0.1107	0.1465	0.182	0.219	0.2563	0.2935	0.3307	0.3688	0.4076	0.4449	0.484	0.523	0.5618
RelAN-terminal-NirD	0.0287	0.0633	0.1024	0.1422	0.1819	0.223	0.2644	0.3053	0.3455	0.3861	0.4272	0.4666	0.507	0.5468	0.5869
RelA1-181-NirD	0.0063	0.0059	0.007	0.0075	0.0072	0.0077	0.0082	0.0087	0.009	0.0093	0.0102	0.0096	0.0105	0.0109	0.0116
RelA181-744-NirD	0.0051	0.0048	0.0059	0.0063	0.006	0.0063	0.0067	0.0069	0.0071	0.007	0.0077	0.0066	0.0072	0.0072	0.0073
								=Slope
									Slope	R2
								Control -	0.0006	0.9296
								Control +	0.0273	0.9998
								RelA-NirD	0.0192	0.9998
								RelA1-663-NirD	0.0222	1
								RelA1-580-NirD	0.0096	0.9969
								RelA1-470-NirD	0.0187	0.9998
								RelAN-terminal-NirD	0.0201	0.9999
								RelA1-181-NirD	0.0002	0.9699
								RelA181-744-NirD	8e-05	0.7492
OD600nm			=10*(OD600nm-OD600nm(Blank))
Blank	0.0895
Control -	0.1853		Control -	0.958
Control +	0.2786		Control +	1.891
RelA-NirD	0.2779		RelA-NirD	1.884
RelA1-663-NirD	0.2694		RelA1-663-NirD	1.799
RelA1-580-NirD	0.2321		RelA1-580-NirD	1.426
RelA1-470-NirD	0.2678		RelA1-470-NirD	1.783
RelAN-terminal-NirD	0.2628		RelAN-terminal-NirD	1.733
RelA1-181-NirD	0.1891		RelA1-181-NirD	0.996
RelA181-744-NirD	0.1993		RelA181-744-NirD	1.098
=1000*(Slope/(0.001*(OD600nm-OD600nm(Blank))))
Control -	626.305
Control +	14436.8
RelA-NirD	10191.1
RelA1-663-NirD	12340.2
RelA1-580-NirD	6732.12
RelA1-470-NirD	10487.9
RelAN-terminal-NirD	11598.4
RelA1-181-NirD	200.803
RelA181-744-NirD	72.8597
22/08/2020
OD420nm
	Time (seconds)
	0	119.256	239.262	359.26	479.242	599.243	719.263	839.255	959.244	1079.25	1199.25	1319.25	1439.25	1559.24	1679.25
Blank	0.098	0.0978	0.0979	0.0981	0.0982	0.0983	0.0985	0.0987	0.0989	0.0992	0.0995	0.0999	0.1004	0.101	0.1013
Control -	0.1043	0.1044	0.105	0.1056	0.1061	0.1066	0.1075	0.1083	0.1095	0.1108	0.1123	0.1139	0.1157	0.1177	0.1196
Control +	0.1301	0.1665	0.2067	0.2441	0.2809	0.3192	0.3587	0.3989	0.4402	0.482	0.5239	0.5653	0.6065	0.6475	0.688
RelA-NirD	0.1293	0.1598	0.1913	0.2246	0.2586	0.2925	0.3259	0.3599	0.3939	0.4288	0.4644	0.5	0.536	0.5723	0.6081
RelA1-663-NirD	0.1352	0.1582	0.1868	0.2149	0.244	0.2733	0.3018	0.3306	0.3598	0.3888	0.4179	0.4476	0.4777	0.5081	0.5383
RelA1-580-NirD	0.1081	0.111	0.115	0.1194	0.1244	0.1299	0.1359	0.1417	0.1481	0.1547	0.1615	0.1681	0.1748	0.182	0.189
RelA1-470-NirD	0.1168	0.126	0.1375	0.1485	0.1604	0.1732	0.1865	0.2003	0.2146	0.2295	0.2447	0.2599	0.2752	0.2916	0.3079
RelAN-terminal-NirD	0.1246	0.1404	0.1614	0.1841	0.2079	0.2324	0.2579	0.2837	0.3104	0.3375	0.3645	0.3909	0.4175	0.4449	0.4714
RelA1-181-NirD	0.1034	0.1032	0.1038	0.1041	0.1046	0.1048	0.1051	0.1056	0.1061	0.1066	0.1072	0.1078	0.1084	0.1093	0.1099
RelA181-744-NirD	0.103	0.1035	0.1042	0.1044	0.1046	0.1048	0.1052	0.1054	0.1057	0.106	0.1063	0.1065	0.1068	0.1072	0.1074
=OD420nm-OD420nm(Blank)
	Time (minutes)
	0	1.9876	3.9877	5.98767	7.98737	9.98738	11.9877	13.9876	15.9874	17.9874	19.9875	21.9875	23.9875	25.9874	27.9875
Control -	0.0063	0.0066	0.0071	0.0075	0.0079	0.0083	0.009	0.0096	0.0106	0.0116	0.0128	0.014	0.0153	0.0167	0.0183
Control +	0.0321	0.0687	0.1088	0.146	0.1827	0.2209	0.2602	0.3002	0.3413	0.3828	0.4244	0.4654	0.5061	0.5465	0.5867
RelA-NirD	0.0313	0.062	0.0934	0.1265	0.1604	0.1942	0.2274	0.2612	0.295	0.3296	0.3649	0.4001	0.4356	0.4713	0.5068
RelA1-663-NirD	0.0372	0.0604	0.0889	0.1168	0.1458	0.175	0.2033	0.2319	0.2609	0.2896	0.3184	0.3477	0.3773	0.4071	0.437
RelA1-580-NirD	0.0101	0.0132	0.0171	0.0213	0.0262	0.0316	0.0374	0.043	0.0492	0.0555	0.062	0.0682	0.0744	0.081	0.0877
RelA1-470-NirD	0.0188	0.0282	0.0396	0.0504	0.0622	0.0749	0.088	0.1016	0.1157	0.1303	0.1452	0.16	0.1748	0.1906	0.2066
RelAN-terminal-NirD	0.0266	0.0426	0.0635	0.086	0.1097	0.1341	0.1594	0.185	0.2115	0.2383	0.265	0.291	0.3171	0.3439	0.3701
RelA1-181-NirD	0.0054	0.0054	0.0059	0.006	0.0064	0.0065	0.0066	0.0069	0.0072	0.0074	0.0077	0.0079	0.008	0.0083	0.0086
RelA181-744-NirD	0.005	0.0057	0.0063	0.0063	0.0064	0.0065	0.0067	0.0067	0.0068	0.0068	0.0068	0.0066	0.0064	0.0062	0.0061
								=Slope
									Slope	R2
								Control -	0.0004	0.9441
								Control +	0.0199	0.9996
								RelA-NirD	0.017	0.9997
								RelA1-663-NirD	0.0144	0.9998
								RelA1-580-NirD	0.0028	0.9933
								RelA1-470-NirD	0.0068	0.996
								RelAN-terminal-NirD	0.0125	0.9981
								RelA1-181-NirD	0.0001	0.9935
								RelA181-744-NirD	3e-05	0.2226
OD600nm			=10*(OD600nm-OD600nm(Blank))
Blank	0.0913
Control -	0.194		Control -	1.027
Control +	0.2833		Control +	1.92
RelA-NirD	0.2575		RelA-NirD	1.662
RelA1-663-NirD	0.268		RelA1-663-NirD	1.767
RelA1-580-NirD	0.1984		RelA1-580-NirD	1.071
RelA1-470-NirD	0.2344		RelA1-470-NirD	1.431
RelAN-terminal-NirD	0.2676		RelAN-terminal-NirD	1.763
RelA1-181-NirD	0.189		RelA1-181-NirD	0.977
RelA181-744-NirD	0.1951		RelA181-744-NirD	1.038
=1000*(Slope/(0.001*(OD600nm-OD600nm(Blank))))
Control -	389.484
Control +	10364.6
RelA-NirD	10228.6
RelA1-663-NirD	8149.41
RelA1-580-NirD	2614.38
RelA1-470-NirD	4751.92
RelAN-terminal-NirD	7090.19
RelA1-181-NirD	102.354
RelA181-744-NirD	28.9017
24/08/2020
OD420nm
	Time (seconds)
	0	119.198	239.164	359.167	479.169	599.169	719.175	839.171	959.162	1079.17	1199.17	1319.14	1439.14	1559.15	1679.15
Blank	0.0987	0.0987	0.0987	0.0989	0.099	0.099	0.0993	0.0995	0.0997	0.1	0.1003	0.1008	0.1013	0.1017	0.1023
Control -	0.1056	0.1057	0.1062	0.1066	0.1072	0.1081	0.1091	0.1103	0.1118	0.1131	0.1148	0.1169	0.119	0.121	0.1236
Control +	0.1343	0.1806	0.2272	0.2741	0.3207	0.3671	0.4138	0.4609	0.5072	0.5524	0.5979	0.6439	0.6885	0.7324	0.7753
RelA-NirD	0.1176	0.1384	0.1608	0.1846	0.21	0.2359	0.2628	0.2904	0.3182	0.3465	0.375	0.4042	0.4338	0.4631	0.4921
RelA1-663-NirD	0.1132	0.1216	0.1308	0.1403	0.1503	0.1603	0.1716	0.1823	0.1953	0.2071	0.2192	0.2332	0.2459	0.2593	0.2733
RelA1-580-NirD	0.1156	0.1275	0.1392	0.1514	0.164	0.1775	0.1916	0.2065	0.2217	0.2371	0.2532	0.27	0.2868	0.3038	0.3213
RelA1-470-NirD	0.1137	0.1299	0.1473	0.165	0.1841	0.2038	0.2238	0.2438	0.2632	0.2825	0.3023	0.323	0.3436	0.3646	0.3861
RelAN-terminal-NirD	0.1197	0.1403	0.162	0.1848	0.2082	0.2324	0.2578	0.2835	0.3097	0.3357	0.3622	0.3889	0.4155	0.4421	0.469
RelA1-181-NirD	0.105	0.105	0.1052	0.1055	0.1059	0.1061	0.1065	0.107	0.1076	0.1082	0.1089	0.1096	0.1103	0.111	0.1119
RelA181-744-NirD	0.1032	0.1036	0.1042	0.1041	0.1044	0.1045	0.1048	0.1052	0.1054	0.1056	0.1064	0.1063	0.1066	0.1068	0.1073
=OD420nm-OD420nm(Blank)
	Time (minutes)
	0	1.98663	3.98607	5.98612	7.98615	9.98615	11.9863	13.9862	15.986	17.9862	19.9862	21.9857	23.9857	25.9859	27.9859
Control -	0.0069	0.007	0.0075	0.0077	0.0082	0.0091	0.0098	0.0108	0.0121	0.0131	0.0145	0.0161	0.0177	0.0193	0.0213
Control +	0.0356	0.0819	0.1285	0.1752	0.2217	0.2681	0.3145	0.3614	0.4075	0.4524	0.4976	0.5431	0.5872	0.6307	0.673
RelA-NirD	0.0189	0.0397	0.0621	0.0857	0.111	0.1369	0.1635	0.1909	0.2185	0.2465	0.2747	0.3034	0.3325	0.3614	0.3898
RelA1-663-NirD	0.0145	0.0229	0.0321	0.0414	0.0513	0.0613	0.0723	0.0828	0.0956	0.1071	0.1189	0.1324	0.1446	0.1576	0.171
RelA1-580-NirD	0.0169	0.0288	0.0405	0.0525	0.065	0.0785	0.0923	0.107	0.122	0.1371	0.1529	0.1692	0.1855	0.2021	0.219
RelA1-470-NirD	0.015	0.0312	0.0486	0.0661	0.0851	0.1048	0.1245	0.1443	0.1635	0.1825	0.202	0.2222	0.2423	0.2629	0.2838
RelAN-terminal-NirD	0.021	0.0416	0.0633	0.0859	0.1092	0.1334	0.1585	0.184	0.21	0.2357	0.2619	0.2881	0.3142	0.3404	0.3667
RelA1-181-NirD	0.0063	0.0063	0.0065	0.0066	0.0069	0.0071	0.0072	0.0075	0.0079	0.0082	0.0086	0.0088	0.009	0.0093	0.0096
RelA181-744-NirD	0.0045	0.0049	0.0055	0.0052	0.0054	0.0055	0.0055	0.0057	0.0057	0.0056	0.0061	0.0055	0.0053	0.0051	0.005
								=Slope
									Slope	R2
								Control -	0.0005	0.9421
								Control +	0.0229	0.9998
								RelA-NirD	0.0134	0.9983
								RelA1-663-NirD	0.0056	0.9958
								RelA1-580-NirD	0.0072	0.9963
								RelA1-470-NirD	0.0097	0.9994
								RelAN-terminal-NirD	0.0125	0.9989
								RelA1-181-NirD	0.0001	0.9821
								RelA181-744-NirD	1e-05	0.0933
OD600nm			=10*(OD600nm-OD600nm(Blank))
Blank	0.0916
Control -	0.1956		Control -	1.04
Control +	0.291		Control +	1.994
RelA-NirD	0.2405		RelA-NirD	1.489
RelA1-663-NirD	0.2185		RelA1-663-NirD	1.269
RelA1-580-NirD	0.2392		RelA1-580-NirD	1.476
RelA1-470-NirD	0.2507		RelA1-470-NirD	1.591
RelAN-terminal-NirD	0.2542		RelAN-terminal-NirD	1.626
RelA1-181-NirD	0.1934		RelA1-181-NirD	1.018
RelA181-744-NirD	0.1872		RelA181-744-NirD	0.956
=1000*(Slope/(0.001*(OD600nm-OD600nm(Blank))))
Control -	480.769
Control +	11484.5
RelA-NirD	8999.33
RelA1-663-NirD	4412.92
RelA1-580-NirD	4878.05
RelA1-470-NirD	6096.79
RelAN-terminal-NirD	7687.58
RelA1-181-NirD	98.2318
RelA181-744-NirD	10.4603
Means and SDs
	Means	SDs
Control -	498.853	119.442
Control +	12095.3	2103.71
RelA-NirD	9806.35	699.154
RelA1-663-NirD	8300.84	3965.8
RelA1-580-NirD	4741.52	2062.26
RelA1-470-NirD	7112.22	2999.8
RelAN-terminal-NirD	8792.05	2448.64
RelA1-181-NirD	133.796	58.0662
RelA181-744-NirD	37.4072	32.0575
