# Supplementary material for: NirD curtails the stringent response by inhibiting RelA activity in Escherichia coli
Source: eLife. 2021 Jul 29;10:e64092. doi: 10.7554/eLife.64092 (PMC8321558; doi:10.7554/eLife.64092)
Supplement: Figure 5—figure supplement 1—source data 1. [file elife-64092-fig5-figsupp1-data1.xlsx]

## Sheet: Fig 5–fig sup 1–source data 1
Figure 5–figure supplement 1–source data 1. Raw data for purification of RelAN-terminal
Elution volume (mL)	A280 (mAU)
-1.22546	0
-1.22146	1.54838
-1.21746	1.67049
-1.21346	1.67452
-1.20947	1.68209
-1.20547	0.952482
-1.20147	0.017702
-1.19747	0.04233
-1.19347	0.095683
-1.18947	0.218534
-1.18547	0.438684
-1.18147	0.617722
-1.17747	0.617045
-1.17347	0.501482
-1.16948	0.302424
-1.16548	0.002713
-1.16148	-0.436485
-1.15748	-0.907972
-1.15348	-1.2384
-1.14948	-1.4377
-1.14548	-1.5206
-1.14148	-1.3686
-1.13748	-0.993808
-1.13348	-0.58107
-1.12948	-0.172467
-1.12549	0.220052
-1.12149	0.586691
-1.11749	0.837626
-1.11349	0.8657
-1.10949	0.810953
-1.10549	0.760639
-1.10149	0.712791
-1.09749	0.663847
-1.09349	0.561013
-1.08949	0.442976
-1.08549	0.326544
-1.0815	0.206363
-1.0775	0.083485
-1.0735	-0.055479
-1.0695	-0.198187
-1.0655	-0.330956
-1.0615	-0.444596
-1.0575	-0.564015
-1.0535	-0.693328
-1.0495	-0.821903
-1.0455	-0.955851
-1.0415	-1.09475
-1.0375	-1.23806
-1.03351	-1.36833
-1.02951	-1.46383
-1.02551	-1.52751
-1.02151	-1.57223
-1.01751	-1.62428
-1.01351	-1.68346
-1.00951	-1.73963
-1.00551	-1.80928
-1.00151	-1.89683
-0.997514	-1.9953
-0.993515	-2.09453
-0.989516	-2.18679
-0.985517	-2.28289
-0.981518	-2.38593
-0.977519	-2.49897
-0.97352	-2.6205
-0.969521	-2.74178
-0.965522	-2.86268
-0.961523	-2.98131
-0.957524	-3.08973
-0.953524	-3.18662
-0.949525	-3.27916
-0.945526	-3.3721
-0.941527	-3.46654
-0.937528	-3.55903
-0.933529	-3.65221
-0.92953	-3.74897
-0.925531	-3.84389
-0.921532	-3.93246
-0.917533	-4.01361
-0.913534	-4.08421
-0.909535	-4.14664
-0.905536	-4.20555
-0.901536	-4.25901
-0.897537	-4.30527
-0.893538	-4.34561
-0.889539	-4.38075
-0.88554	-4.41232
-0.881541	-4.44027
-0.877542	-4.46166
-0.873543	-4.47774
-0.869544	-4.4903
-0.865545	-4.5012
-0.861546	-4.51164
-0.857547	-4.51731
-0.853548	-4.52235
-0.849548	-4.52773
-0.845549	-4.53062
-0.84155	-4.53304
-0.837551	-4.5356
-0.833552	-4.53789
-0.829553	-4.53725
-0.825554	-4.5376
-0.821555	-4.54219
-0.817556	-4.54791
-0.813557	-4.55108
-0.809558	-4.55303
-0.805559	-4.55625
-0.80156	-4.56039
-0.79756	-4.56412
-0.793561	-4.56656
-0.789562	-4.57022
-0.785563	-4.57471
-0.781564	-4.58164
-0.777565	-4.58986
-0.773566	-4.59716
-0.769567	-4.60383
-0.765568	-4.61061
-0.761569	-4.61788
-0.75757	-4.62325
-0.753571	-4.62713
-0.749572	-4.62944
-0.745573	-4.62877
-0.741573	-4.62862
-0.737574	-4.62863
-0.733575	-4.62876
-0.729576	-4.63004
-0.725577	-4.63203
-0.721578	-4.63541
-0.717579	-4.63982
-0.71358	-4.64554
-0.709581	-4.64966
-0.705582	-4.65178
-0.701583	-4.65611
-0.697584	-4.66006
-0.693585	-4.66113
-0.689585	-4.66083
-0.685586	-4.66201
-0.681587	-4.66124
-0.677588	-4.65841
-0.673589	-4.65482
-0.66959	-4.65369
-0.665591	-4.65353
-0.661592	-4.65046
-0.657593	-4.64822
-0.653594	-4.64539
-0.649595	-4.64036
-0.645596	-4.63279
-0.641597	-4.63051
-0.637597	-4.63082
-0.633598	-4.63155
-0.629599	-4.63312
-0.6256	-4.63693
-0.621601	-4.64185
-0.617602	-4.64142
-0.613603	-4.63854
-0.609604	-4.63414
-0.605605	-4.62903
-0.601606	-4.62513
-0.597607	-4.62337
-0.593608	-4.62161
-0.589609	-4.62035
-0.585609	-4.62186
-0.58161	-4.62106
-0.577611	-4.62099
-0.573612	-4.6218
-0.569613	-4.61747
-0.565614	-4.61221
-0.561615	-4.60937
-0.557616	-4.60755
-0.553617	-4.60398
-0.549618	-4.60102
-0.545619	-4.60142
-0.54162	-4.60434
-0.537621	-4.60512
-0.533621	-4.60222
-0.529622	-4.60095
-0.525623	-4.59998
-0.521624	-4.59835
-0.517625	-4.59702
-0.513626	-4.59413
-0.509627	-4.59296
-0.505628	-4.59512
-0.501629	-4.59822
-0.49763	-4.59875
-0.493631	-4.59866
-0.489632	-4.6009
-0.485633	-4.6011
-0.481633	-4.59865
-0.477634	-4.59837
-0.473635	-4.59847
-0.469636	-4.59604
-0.465637	-4.5934
-0.461638	-4.59367
-0.457639	-4.59441
-0.45364	-4.59387
-0.449641	-4.5949
-0.445642	-4.59729
-0.441643	-4.59815
-0.437644	-4.59748
-0.433645	-4.59919
-0.429645	-4.59919
-0.425646	-4.59714
-0.421647	-4.59716
-0.417648	-4.59978
-0.413649	-4.60152
-0.40965	-4.60065
-0.405651	-4.60101
-0.401652	-4.60188
-0.397653	-4.60313
-0.393654	-4.60271
-0.389655	-4.60126
-0.385656	-4.6011
-0.381657	-4.60286
-0.377658	-4.60666
-0.373658	-4.60826
-0.369659	-4.60885
-0.36566	-4.6123
-0.361661	-4.61548
-0.357662	-4.61754
-0.353663	-4.61784
-0.349664	-4.61956
-0.345665	-4.62139
-0.341666	-4.62071
-0.337667	-4.62
-0.333668	-4.62024
-0.329669	-4.61986
-0.32567	-4.61744
-0.32167	-4.6171
-0.317671	-4.61919
-0.313672	-4.62104
-0.309673	-4.62186
-0.305674	-4.62166
-0.301675	-4.62202
-0.297676	-4.62029
-0.293677	-4.61842
-0.289678	-4.61845
-0.285679	-4.61956
-0.28168	-4.61995
-0.277681	-4.62118
-0.273682	-4.62343
-0.269682	-4.62523
-0.265683	-4.62483
-0.261684	-4.6255
-0.257685	-4.62735
-0.253686	-4.62968
-0.249687	-4.63336
-0.245688	-4.63607
-0.241689	-4.63888
-0.23769	-4.63978
-0.233691	-4.64129
-0.229692	-4.64091
-0.225693	-4.6395
-0.221694	-4.64042
-0.217695	-4.64061
-0.213695	-4.63942
-0.209696	-4.63686
-0.205697	-4.63544
-0.201698	-4.63584
-0.197699	-4.63577
-0.1937	-4.6334
-0.189701	-4.63111
-0.185702	-4.63384
-0.181703	-4.63819
-0.177704	-4.64044
-0.173705	-4.64365
-0.169706	-4.64706
-0.165707	-4.64939
-0.161707	-4.64789
-0.157708	-4.64682
-0.153709	-4.64765
-0.14971	-4.64893
-0.145711	-4.64883
-0.141712	-4.64945
-0.137713	-4.65125
-0.133714	-4.65151
-0.129715	-4.65151
-0.125716	-4.65263
-0.121717	-4.65284
-0.117718	-4.65448
-0.113719	-4.65688
-0.109719	-4.6581
-0.10572	-4.6592
-0.101721	-4.65951
-0.097722	-4.65941
-0.093723	-4.66085
-0.089724	-4.66336
-0.085725	-4.66343
-0.081726	-4.66189
-0.077727	-4.66013
-0.073728	-4.65993
-0.069729	-4.65915
-0.06573	-4.65761
-0.061731	-4.66131
-0.057732	-4.66733
-0.053732	-4.67084
-0.049733	-4.675
-0.045734	-4.67725
-0.041735	-4.67878
-0.037736	-4.6798
-0.033737	-4.67849
-0.029738	-4.67895
-0.025739	-4.68012
-0.02174	-4.68009
-0.017741	-4.68084
-0.013742	-4.68215
-0.009742	-4.68214
-0.005744	-2.97683
-0.001744	0.001716
0.002255	0.003483
0.006254	0.004053
0.010253	0.004495
0.014252	0.001369
0.018251	0.000289
0.02225	-0.000493
0.026249	-0.002157
0.030248	-0.001987
0.034247	-0.003579
0.038246	-0.003839
0.042245	-0.003633
0.046245	-0.0055
0.050244	-0.007076
0.054243	-0.010953
0.058242	-0.013492
0.062241	-0.013485
0.06624	-0.013136
0.070239	-0.010328
0.074238	-0.00709
0.078237	-0.00027
0.082236	0.004792
0.086235	0.009302
0.090234	0.014241
0.094233	0.017982
0.098233	0.019168
0.102232	0.017823
0.106231	0.019925
0.11023	0.019047
0.114229	0.019598
0.118228	0.019415
0.122227	0.018672
0.126226	0.019
0.130225	0.017527
0.134224	0.018707
0.138223	0.016297
0.142222	0.011951
0.146221	0.011117
0.150221	0.009083
0.15422	0.005967
0.158219	0.00198
0.162218	0.00106
0.166217	0.003207
0.170216	4.1e-05
0.174215	-0.002437
0.178214	-0.000435
0.182213	-0.000635
0.186212	-0.003793
0.190211	-0.005808
0.19421	-0.007772
0.198209	-0.011311
0.202209	-0.016181
0.206208	-0.018743
0.210207	-0.019127
0.214206	-0.020382
0.218205	-0.021121
0.222204	-0.02233
0.226203	-0.022081
0.230202	-0.021001
0.234201	-0.019751
0.2382	-0.015822
0.242199	-0.013272
0.246198	-0.009271
0.250197	-0.005276
0.254196	-0.0035
0.258196	-0.002901
0.262195	-0.003468
0.266194	-0.001505
0.270193	-0.000522
0.274192	0.00393
0.278191	0.007397
0.28219	0.009383
0.286189	0.008131
0.290188	0.008389
0.294187	0.009484
0.298186	0.005367
0.302185	0.003602
0.306184	0.00397
0.310184	0.005037
0.314183	0.007676
0.318182	0.006711
0.322181	0.004853
0.32618	0.004919
0.330179	0.006483
0.334178	0.007821
0.338177	0.008919
0.342176	0.040428
0.346175	0.071205
0.350174	0.078627
0.354173	0.078403
0.358172	0.075451
0.362172	0.0732
0.366171	0.048712
0.37017	0.011043
0.374169	0.000573
0.378168	-0.003093
0.382167	-0.004454
0.386166	-0.005009
0.390165	-0.005052
0.394164	-0.006819
0.398163	-0.009323
0.402162	-0.0108
0.406161	-0.011297
0.41016	-0.011433
0.41416	-0.013911
0.418159	-0.015201
0.422158	-0.015917
0.426157	-0.015621
0.430156	-0.016899
0.434155	-0.018566
0.438154	-0.016614
0.442153	-0.014293
0.446152	-0.01069
0.450151	-0.006022
0.45415	-0.006654
0.458149	-0.00747
0.462148	-0.007841
0.466148	-0.011207
0.470147	-0.013767
0.474146	-0.016577
0.478145	-0.018189
0.482144	-0.020713
0.486143	-0.022497
0.490142	-0.022158
0.494141	-0.023066
0.49814	-0.025587
0.502139	-0.023285
0.506138	-0.021764
0.510137	-0.019698
0.514136	-0.018298
0.518135	-0.019132
0.522135	-0.018278
0.526134	-0.019758
0.530133	-0.022221
0.534132	-0.023929
0.538131	-0.025987
0.54213	-0.025902
0.546129	-0.025427
0.550128	-0.027546
0.554127	-0.031881
0.558126	-0.034815
0.562125	-0.035949
0.566124	-0.036765
0.570123	-0.038014
0.574123	-0.037089
0.578122	-0.035302
0.582121	-0.034929
0.58612	-0.037097
0.590119	-0.036794
0.594118	-0.038775
0.598117	-0.037267
0.602116	-0.036716
0.606115	-0.038696
0.610114	-0.038896
0.614113	-0.038069
0.618112	-0.039492
0.622111	-0.044256
0.626111	-0.047989
0.63011	-0.04955
0.634109	-0.048719
0.638108	-0.050229
0.642107	-0.051416
0.646106	-0.050124
0.650105	-0.04503
0.654104	-0.041759
0.658103	-0.040298
0.662102	-0.039748
0.666101	-0.040636
0.6701	-0.043994
0.674099	-0.049576
0.678099	-0.054384
0.682098	-0.055313
0.686097	-0.05567
0.690096	-0.056811
0.694095	-0.053258
0.698094	-0.051543
0.702093	-0.050906
0.706092	-0.051628
0.710091	-0.053973
0.71409	-0.056733
0.718089	-0.060173
0.722088	-0.063859
0.726087	-0.064099
0.730086	-0.063649
0.734086	-0.061382
0.738085	-0.060225
0.742084	-0.05814
0.746083	-0.056835
0.750082	-0.057448
0.754081	-0.061602
0.75808	-0.063572
0.762079	-0.065593
0.766078	-0.067986
0.770077	-0.06899
0.774076	-0.068542
0.778075	-0.066742
0.782075	-0.06578
0.786074	-0.06635
0.790073	-0.064666
0.794072	-0.064746
0.798071	-0.064078
0.80207	-0.061839
0.806069	-0.059897
0.810068	-0.059083
0.814067	-0.057209
0.818066	-0.056423
0.822065	-0.054694
0.826064	-0.055091
0.830063	-0.05683
0.834062	-0.056445
0.838061	-0.057043
0.842061	-0.055822
0.84606	-0.05624
0.850059	-0.057902
0.854058	-0.059527
0.858057	-0.059602
0.862056	-0.061123
0.866055	-0.064175
0.870054	-0.065264
0.874053	-0.066706
0.878052	-0.068447
0.882051	-0.069686
0.88605	-0.070903
0.89005	-0.071092
0.894049	-0.071166
0.898048	-0.071274
0.902047	-0.068268
0.906046	-0.066483
0.910045	-0.068374
0.914044	-0.070516
0.918043	-0.071248
0.922042	-0.073919
0.926041	-0.076884
0.93004	-0.079594
0.934039	-0.079656
0.938038	-0.079238
0.942037	-0.081193
0.946037	-0.084202
0.950036	-0.085393
0.954035	-0.087129
0.958034	-0.085279
0.962033	-0.086028
0.966032	-0.087419
0.970031	-0.086333
0.97403	-0.084174
0.978029	-0.083597
0.982028	-0.084701
0.986027	-0.083885
0.990026	-0.082621
0.994026	-0.081673
0.998025	-0.082764
1.00202	-0.08361
1.00602	-0.082785
1.01002	-0.084477
1.01402	-0.085647
1.01802	-0.08764
1.02202	-0.087373
1.02602	-0.088492
1.03002	-0.091173
1.03402	-0.091982
1.03801	-0.090003
1.04201	-0.088067
1.04601	-0.087429
1.05001	-0.086343
1.05401	-0.086381
1.05801	-0.086404
1.06201	-0.087231
1.06601	-0.089838
1.07001	-0.090166
1.07401	-0.088601
1.07801	-0.089901
1.08201	-0.091576
1.086	-0.092868
1.09	-0.094728
1.094	-0.097177
1.098	-0.099426
1.102	-0.09979
1.106	-0.097638
1.11	-0.096924
1.114	-0.09835
1.118	-0.098509
1.122	-0.098858
1.126	-0.100278
1.12999	-0.104033
1.13399	-0.106287
1.13799	-0.106311
1.14199	-0.105851
1.14599	-0.106341
1.14999	-0.107735
1.15399	-0.10679
1.15799	-0.106132
1.16199	-0.107739
1.16599	-0.108265
1.16999	-0.109626
1.17398	-0.111164
1.17798	-0.111326
1.18198	-0.112274
1.18598	-0.111996
1.18998	-0.111613
1.19398	-0.110415
1.19798	-0.108431
1.20198	-0.108505
1.20598	-0.107721
1.20998	-0.105772
1.21398	-0.104986
1.21797	-0.104852
1.22197	-0.107326
1.22597	-0.107372
1.22997	-0.106779
1.23397	-0.108562
1.23797	-0.108351
1.24197	-0.109931
1.24597	-0.108593
1.24997	-0.106975
1.25396	-0.106313
1.25796	-0.105562
1.26196	-0.105273
1.26596	-0.103246
1.26996	-0.104797
1.27396	-0.105985
1.27796	-0.108454
1.28196	-0.111793
1.28596	-0.114773
1.28996	-0.117452
1.29396	-0.118358
1.29795	-0.118551
1.30195	-0.117767
1.30595	-0.117062
1.30995	-0.119286
1.31395	-0.122892
1.31795	-0.12515
1.32195	-0.126635
1.32595	-0.124801
1.32995	-0.123132
1.33395	-0.12088
1.33795	-0.119752
1.34194	-0.118148
1.34594	-0.115607
1.34994	-0.114552
1.35394	-0.116005
1.35794	-0.113893
1.36194	-0.110797
1.36594	-0.108628
1.36994	-0.108334
1.37394	-0.109092
1.37794	-0.11151
1.38194	-0.113293
1.38593	-0.11504
1.38993	-0.116869
1.39393	-0.116892
1.39793	-0.117849
1.40193	-0.11846
1.40593	-0.119964
1.40993	-0.121451
1.41393	-0.123633
1.41793	-0.124461
1.42193	-0.123305
1.42593	-0.123313
1.42992	-0.12356
1.43392	-0.124904
1.43792	-0.123385
1.44192	-0.122989
1.44592	-0.124328
1.44992	-0.125793
1.45392	-0.125327
1.45792	-0.124664
1.46192	-0.127514
1.46592	-0.128495
1.46992	-0.129619
1.47392	-0.13097
1.47791	-0.130642
1.48191	-0.129575
1.48591	-0.128961
1.48991	-0.129376
1.49391	-0.130388
1.49791	-0.12819
1.50191	-0.128916
1.50591	-0.131547
1.50991	-0.133114
1.51391	-0.132308
1.5179	-0.130541
1.5219	-0.131054
1.5259	-0.131887
1.5299	-0.130952
1.5339	-0.128934
1.5379	-0.125789
1.5419	-0.124452
1.5459	-0.123692
1.5499	-0.123765
1.5539	-0.124153
1.5579	-0.125458
1.56189	-0.125228
1.56589	-0.125175
1.56989	-0.125962
1.57389	-0.124836
1.57789	-0.123884
1.58189	-0.121768
1.58589	-0.122009
1.58989	-0.12204
1.59389	-0.122872
1.59789	-0.124589
1.60189	-0.125541
1.60588	-0.127634
1.60988	-0.129113
1.61388	-0.130135
1.61788	-0.130605
1.62188	-0.131405
1.62588	-0.129657
1.62988	-0.129308
1.63388	-0.13006
1.63788	-0.131349
1.64188	-0.133982
1.64587	-0.134261
1.64987	-0.135497
1.65387	-0.135895
1.65787	-0.136912
1.66187	-0.138828
1.66587	-0.138745
1.66987	-0.138777
1.67387	-0.139665
1.67787	-0.138171
1.68187	-0.13812
1.68587	-0.136503
1.68986	-0.135816
1.69386	-0.135065
1.69786	-0.134717
1.70186	-0.135588
1.70586	-0.135806
1.70986	-0.136009
1.71386	-0.133802
1.71786	-0.132224
1.72186	-0.132493
1.72586	-0.131877
1.72985	-0.129398
1.73385	-0.12944
1.73785	-0.129161
1.74185	-0.131105
1.74585	-0.131158
1.74985	-0.129981
1.75385	-0.130233
1.75785	-0.131047
1.76185	-0.133186
1.76585	-0.135956
1.76985	-0.136126
1.77384	-0.135305
1.77784	-0.135371
1.78184	-0.136575
1.78584	-0.136786
1.78984	-0.137494
1.79384	-0.138481
1.79784	-0.139965
1.80184	-0.141971
1.80584	-0.141056
1.80984	-0.140849
1.81384	-0.14086
1.81784	-0.141586
1.82183	-0.142568
1.82583	-0.14294
1.82983	-0.145307
1.83383	-0.148449
1.83783	-0.150472
1.84183	-0.151027
1.84583	-0.150888
1.84983	-0.150566
1.85383	-0.149706
1.85783	-0.149161
1.86183	-0.148616
1.86582	-0.14866
1.86982	-0.146836
1.87382	-0.145341
1.87782	-0.144186
1.88182	-0.144382
1.88582	-0.144292
1.88982	-0.1443
1.89382	-0.145244
1.89782	-0.147397
1.90182	-0.149044
1.90582	-0.150301
1.90981	-0.151223
1.91381	-0.150981
1.91781	-0.149654
1.92181	-0.146544
1.92581	-0.147635
1.92981	-0.148475
1.93381	-0.146714
1.93781	-0.146144
1.94181	-0.148336
1.94581	-0.151862
1.94981	-0.152952
1.9538	-0.153275
1.9578	-0.155288
1.9618	-0.159168
1.9658	-0.161634
1.9698	-0.163411
1.9738	-0.164753
1.9778	-0.164233
1.9818	-0.165542
1.9858	-0.165016
1.98979	-0.163391
1.99379	-0.160049
1.99779	-0.15836
2.00179	-0.157391
2.00579	-0.156877
2.00979	-0.156658
2.01379	-0.15659
2.01779	-0.155967
2.02179	-0.15552
2.02579	-0.156045
2.02979	-0.155307
2.03378	-0.152941
2.03778	-0.151438
2.04178	-0.152041
2.04578	-0.1525
2.04978	-0.152598
2.05378	-0.154458
2.05778	-0.156092
2.06178	-0.157811
2.06578	-0.16023
2.06978	-0.161284
2.07378	-0.163067
2.07777	-0.162797
2.08177	-0.162089
2.08577	-0.160255
2.08977	-0.157859
2.09377	-0.159537
2.09777	-0.160188
2.10177	-0.158879
2.10577	-0.157203
2.10977	-0.157663
2.11377	-0.158877
2.11777	-0.159071
2.12176	-0.156488
2.12576	-0.155802
2.12976	-0.157428
2.13376	-0.158469
2.13776	-0.157263
2.14176	-0.155775
2.14576	-0.157495
2.14976	-0.157915
2.15376	-0.160184
2.15776	-0.1601
2.16176	-0.161092
2.16575	-0.16328
2.16975	-0.163513
2.17375	-0.162263
2.17775	-0.16172
2.18175	-0.160134
2.18575	-0.159608
2.18975	-0.158414
2.19375	-0.15761
2.19775	-0.158503
2.20175	-0.160394
2.20575	-0.161082
2.20974	-0.163609
2.21374	-0.167277
2.21774	-0.169048
2.22174	-0.170032
2.22574	-0.17049
2.22974	-0.170215
2.23374	-0.17181
2.23774	-0.172387
2.24174	-0.173656
2.24574	-0.174777
2.24973	-0.17521
2.25373	-0.174902
2.25773	-0.174481
2.26173	-0.172528
2.26573	-0.170312
2.26973	-0.167946
2.27373	-0.166515
2.27773	-0.166271
2.28173	-0.164159
2.28573	-0.161687
2.28973	-0.16197
2.29372	-0.164632
2.29772	-0.166336
2.30172	-0.167162
2.30572	-0.16844
2.30972	-0.169939
2.31372	-0.170309
2.31772	-0.169018
2.32172	-0.167238
2.32572	-0.166917
2.32972	-0.166733
2.33372	-0.166238
2.33772	-0.165468
2.34171	-0.164608
2.34571	-0.163323
2.34971	-0.163372
2.35371	-0.163779
2.35771	-0.164348
2.36171	-0.164813
2.36571	-0.163289
2.36971	-0.165654
2.37371	-0.167371
2.37771	-0.165476
2.38171	-0.163808
2.3857	-0.162373
2.3897	-0.162779
2.3937	-0.161067
2.3977	-0.157976
2.4017	-0.157528
2.4057	-0.157776
2.4097	-0.15893
2.4137	-0.159309
2.4177	-0.162545
2.4217	-0.166944
2.42569	-0.170285
2.42969	-0.172276
2.43369	-0.172345
2.43769	-0.171369
2.44169	-0.168912
2.44569	-0.167873
2.44969	-0.16769
2.45369	-0.168042
2.45769	-0.167056
2.46169	-0.169547
2.46569	-0.171083
2.46969	-0.170354
2.47368	-0.171117
2.47768	-0.172568
2.48168	-0.172704
2.48568	-0.17137
2.48968	-0.17042
2.49368	-0.16852
2.49768	-0.167781
2.50168	-0.167324
2.50568	-0.16646
2.50968	-0.16753
2.51367	-0.167976
2.51767	-0.169172
2.52167	-0.168536
2.52567	-0.168063
2.52967	-0.168154
2.53367	-0.166147
2.53767	-0.164444
2.54167	-0.165046
2.54567	-0.165018
2.54967	-0.163254
2.55367	-0.163628
2.55766	-0.165914
2.56166	-0.16739
2.56566	-0.167654
2.56966	-0.166825
2.57366	-0.168522
2.57766	-0.168987
2.58166	-0.165553
2.58566	-0.163409
2.58966	-0.162316
2.59366	-0.163767
2.59766	-0.163026
2.60165	-0.161888
2.60565	-0.162721
2.60965	-0.16311
2.61365	-0.164597
2.61765	-0.163597
2.62165	-0.163317
2.62565	-0.165489
2.62965	-0.1653
2.63365	-0.163743
2.63765	-0.16349
2.64165	-0.165201
2.64564	-0.165938
2.64964	-0.166272
2.65364	-0.164358
2.65764	-0.164146
2.66164	-0.165791
2.66564	-0.166723
2.66964	-0.166016
2.67364	-0.165917
2.67764	-0.167272
2.68163	-0.166662
2.68563	-0.166002
2.68963	-0.16337
2.69363	-0.161329
2.69763	-0.161022
2.70163	-0.160026
2.70563	-0.15897
2.70963	-0.159845
2.71363	-0.160292
2.71763	-0.16106
2.72163	-0.162012
2.72563	-0.161936
2.72962	-0.16101
2.73362	-0.161318
2.73762	-0.161105
2.74162	-0.159992
2.74562	-0.158103
2.74962	-0.155975
2.75362	-0.155613
2.75762	-0.157348
2.76162	-0.157875
2.76562	-0.157007
2.76961	-0.158367
2.77361	-0.160545
2.77761	-0.159223
2.78161	-0.155538
2.78561	-0.155127
2.78961	-0.156629
2.79361	-0.157478
2.79761	-0.158714
2.80161	-0.160268
2.80561	-0.160797
2.80961	-0.162546
2.8136	-0.164183
2.8176	-0.16441
2.8216	-0.162902
2.8256	-0.16241
2.8296	-0.163536
2.8336	-0.163309
2.8376	-0.163907
2.8416	-0.164215
2.8456	-0.164781
2.8496	-0.165455
2.8536	-0.164933
2.85759	-0.165914
2.86159	-0.166092
2.86559	-0.164579
2.86959	-0.165339
2.87359	-0.166659
2.87759	-0.166964
2.88159	-0.16725
2.88559	-0.168005
2.88959	-0.169158
2.89359	-0.168728
2.89759	-0.167192
2.90158	-0.16838
2.90558	-0.168838
2.90958	-0.168424
2.91358	-0.167146
2.91758	-0.164506
2.92158	-0.163723
2.92558	-0.163265
2.92958	-0.161583
2.93358	-0.16257
2.93758	-0.163857
2.94158	-0.166374
2.94557	-0.168437
2.94957	-0.17032
2.95357	-0.171863
2.95757	-0.169267
2.96157	-0.167578
2.96557	-0.166954
2.96957	-0.16347
2.97357	-0.161462
2.97757	-0.160792
2.98157	-0.161858
2.98556	-0.162301
2.98956	-0.162757
2.99356	-0.165084
2.99756	-0.166311
3.00156	-0.166525
3.00556	-0.16647
3.00956	-0.167076
3.01356	-0.167171
3.01756	-0.165842
3.02156	-0.166366
3.02556	-0.166245
3.02956	-0.166754
3.03355	-0.16688
3.03755	-0.1691
3.04155	-0.169851
3.04555	-0.171934
3.04955	-0.172602
3.05355	-0.175769
3.05755	-0.178748
3.06155	-0.178586
3.06555	-0.180437
3.06955	-0.183297
3.07355	-0.185261
3.07754	-0.184977
3.08154	-0.186152
3.08554	-0.188661
3.08954	-0.189241
3.09354	-0.18763
3.09754	-0.185454
3.10154	-0.183815
3.10554	-0.180612
3.10954	-0.176935
3.11354	-0.175334
3.11754	-0.17294
3.12153	-0.173354
3.12553	-0.175663
3.12953	-0.177729
3.13353	-0.175618
3.13753	-0.172969
3.14153	-0.172035
3.14553	-0.171063
3.14953	-0.169659
3.15353	-0.168109
3.15753	-0.169476
3.16153	-0.170052
3.16552	-0.17133
3.16952	-0.173019
3.17352	-0.174372
3.17752	-0.174808
3.18152	-0.174895
3.18552	-0.175594
3.18952	-0.175282
3.19352	-0.173417
3.19752	-0.171453
3.20152	-0.169775
3.20551	-0.168403
3.20951	-0.169767
3.21351	-0.172314
3.21751	-0.174079
3.22151	-0.176185
3.22551	-0.177562
3.22951	-0.177108
3.23351	-0.17558
3.23751	-0.172858
3.24151	-0.172311
3.24551	-0.171265
3.24951	-0.170824
3.2535	-0.172227
3.2575	-0.17231
3.2615	-0.172166
3.2655	-0.172327
3.2695	-0.173326
3.2735	-0.17427
3.2775	-0.174557
3.2815	-0.175068
3.2855	-0.176439
3.2895	-0.17572
3.29349	-0.17573
3.29749	-0.174961
3.30149	-0.174537
3.30549	-0.173659
3.30949	-0.173342
3.31349	-0.174179
3.31749	-0.176602
3.32149	-0.177601
3.32549	-0.177332
3.32949	-0.179137
3.33349	-0.179749
3.33748	-0.178289
3.34148	-0.176754
3.34548	-0.175759
3.34948	-0.174472
3.35348	-0.172395
3.35748	-0.171293
3.36148	-0.172296
3.36548	-0.173775
3.36948	-0.173504
3.37348	-0.172527
3.37748	-0.171223
3.38147	-0.171206
3.38547	-0.172607
3.38947	-0.171777
3.39347	-0.171274
3.39747	-0.172531
3.40147	-0.173625
3.40547	-0.174762
3.40947	-0.174234
3.41347	-0.174373
3.41747	-0.175232
3.42146	-0.175312
3.42546	-0.174016
3.42946	-0.171397
3.43346	-0.168669
3.43746	-0.166169
3.44146	-0.165905
3.44546	-0.167492
3.44946	-0.167143
3.45346	-0.169033
3.45746	-0.170654
3.46145	-0.172276
3.46545	-0.171617
3.46945	-0.171106
3.47345	-0.172445
3.47745	-0.17208
3.48145	-0.170618
3.48545	-0.171732
3.48945	-0.172375
3.49345	-0.170965
3.49745	-0.167736
3.50145	-0.165966
3.50544	-0.165101
3.50944	-0.164426
3.51344	-0.164673
3.51744	-0.16511
3.52144	-0.164807
3.52544	-0.166956
3.52944	-0.170004
3.53344	-0.169563
3.53744	-0.167245
3.54144	-0.165659
3.54544	-0.166591
3.54943	-0.166806
3.55343	-0.166206
3.55743	-0.165205
3.56143	-0.16493
3.56543	-0.164448
3.56943	-0.162624
3.57343	-0.160875
3.57743	-0.159939
3.58143	-0.16025
3.58543	-0.161626
3.58943	-0.162404
3.59342	-0.164116
3.59742	-0.165888
3.60142	-0.16561
3.60542	-0.164902
3.60942	-0.164264
3.61342	-0.163662
3.61742	-0.163479
3.62142	-0.16416
3.62542	-0.164565
3.62942	-0.163054
3.63342	-0.162868
3.63741	-0.164157
3.64141	-0.16506
3.64541	-0.167232
3.64941	-0.167915
3.65341	-0.16904
3.65741	-0.169207
3.66141	-0.16657
3.66541	-0.166349
3.66941	-0.166176
3.67341	-0.164961
3.6774	-0.163533
3.6814	-0.164762
3.6854	-0.166283
3.6894	-0.165834
3.6934	-0.167129
3.6974	-0.169154
3.7014	-0.171079
3.7054	-0.170709
3.7094	-0.171621
3.7134	-0.175592
3.7174	-0.177794
3.72139	-0.176048
3.72539	-0.173999
3.72939	-0.173169
3.73339	-0.173458
3.73739	-0.171874
3.74139	-0.168676
3.74539	-0.16879
3.74939	-0.172183
3.75339	-0.17482
3.75739	-0.175745
3.76139	-0.176522
3.76539	-0.178663
3.76938	-0.179024
3.77338	-0.177103
3.77738	-0.174578
3.78138	-0.173304
3.78538	-0.170777
3.78938	-0.16879
3.79338	-0.168618
3.79738	-0.170016
3.80138	-0.171037
3.80538	-0.170159
3.80938	-0.169291
3.81337	-0.168073
3.81737	-0.168242
3.82137	-0.166598
3.82537	-0.163663
3.82937	-0.16341
3.83337	-0.164502
3.83737	-0.165116
3.84137	-0.166187
3.84537	-0.167063
3.84937	-0.16578
3.85337	-0.164166
3.85736	-0.164158
3.86136	-0.164842
3.86536	-0.167191
3.86936	-0.169742
3.87336	-0.171796
3.87736	-0.17303
3.88136	-0.173599
3.88536	-0.173112
3.88936	-0.170926
3.89336	-0.169879
3.89736	-0.169264
3.90135	-0.168656
3.90535	-0.168084
3.90935	-0.168273
3.91335	-0.168798
3.91735	-0.167893
3.92135	-0.167606
3.92535	-0.167809
3.92935	-0.167779
3.93335	-0.168195
3.93735	-0.167048
3.94135	-0.166397
3.94534	-0.167275
3.94934	-0.166686
3.95334	-0.166725
3.95734	-0.167199
3.96134	-0.169504
3.96534	-0.171285
3.96934	-0.170908
3.97334	-0.170928
3.97734	-0.172178
3.98134	-0.172384
3.98533	-0.172
3.98933	-0.170261
3.99333	-0.1684
3.99733	-0.167842
4.00133	-0.166576
4.00533	-0.166082
4.00933	-0.165899
4.01333	-0.166029
4.01733	-0.16707
4.02133	-0.168571
4.02532	-0.169538
4.02932	-0.168875
4.03332	-0.168549
4.03732	-0.170147
4.04132	-0.17151
4.04532	-0.171284
4.04932	-0.169928
4.05332	-0.168028
4.05732	-0.167099
4.06132	-0.167296
4.06532	-0.166072
4.06931	-0.165249
4.07331	-0.167429
4.07731	-0.170506
4.08131	-0.172384
4.08531	-0.17476
4.08931	-0.176787
4.09331	-0.178766
4.09731	-0.179048
4.10131	-0.179005
4.10531	-0.180047
4.10931	-0.181198
4.11331	-0.180131
4.1173	-0.178791
4.1213	-0.177828
4.1253	-0.178203
4.1293	-0.17796
4.1333	-0.175449
4.1373	-0.173147
4.1413	-0.172032
4.1453	-0.171929
4.1493	-0.170424
4.1533	-0.168481
4.1573	-0.169132
4.16129	-0.171528
4.16529	-0.171175
4.16929	-0.169909
4.17329	-0.170705
4.17729	-0.172917
4.18129	-0.173973
4.18529	-0.174923
4.18929	-0.176598
4.19329	-0.177279
4.19728	-0.1762
4.20128	-0.176434
4.20528	-0.176907
4.20928	-0.176506
4.21328	-0.174292
4.21728	-0.174371
4.22128	-0.176288
4.22528	-0.176056
4.22928	-0.17363
4.23328	-0.170405
4.23728	-0.170949
4.24127	-0.172451
4.24527	-0.172305
4.24927	-0.173173
4.25327	-0.17371
4.25727	-0.17293
4.26127	-0.172927
4.26527	-0.172745
4.26927	-0.172235
4.27327	-0.172042
4.27727	-0.173236
4.28127	-0.173762
4.28526	-0.172734
4.28926	-0.170965
4.29326	-0.169219
4.29726	-0.168321
4.30126	-0.167649
4.30526	-0.170311
4.30926	-0.171837
4.31326	-0.173637
4.31726	-0.176367
4.32126	-0.176011
4.32526	-0.174239
4.32925	-0.174353
4.33325	-0.174048
4.33725	-0.171692
4.34125	-0.170033
4.34525	-0.169861
4.34925	-0.171079
4.35325	-0.170905
4.35725	-0.17094
4.36125	-0.17201
4.36525	-0.173335
4.36925	-0.174553
4.37324	-0.173892
4.37724	-0.173571
4.38124	-0.173037
4.38524	-0.171535
4.38924	-0.170598
4.39324	-0.168669
4.39724	-0.167926
4.40124	-0.169116
4.40524	-0.17004
4.40924	-0.171506
4.41324	-0.169324
4.41723	-0.167551
4.42123	-0.167969
4.42523	-0.166289
4.42923	-0.165556
4.43323	-0.166077
4.43723	-0.168939
4.44123	-0.17119
4.44523	-0.171314
4.44923	-0.172306
4.45323	-0.172745
4.45723	-0.171706
4.46122	-0.172039
4.46522	-0.172162
4.46922	-0.172826
4.47322	-0.174245
4.47722	-0.176683
4.48122	-0.179499
4.48522	-0.179433
4.48922	-0.179305
4.49322	-0.179974
4.49722	-0.180019
4.50122	-0.179614
4.50521	-0.179765
4.50921	-0.180416
4.51321	-0.180982
4.51721	-0.180231
4.52121	-0.179571
4.52521	-0.178769
4.52921	-0.17754
4.53321	-0.177062
4.53721	-0.177289
4.54121	-0.178635
4.54521	-0.177874
4.5492	-0.178723
4.5532	-0.179933
4.5572	-0.179841
4.5612	-0.180147
4.5652	-0.181024
4.5692	-0.182667
4.5732	-0.182652
4.5772	-0.181065
4.5812	-0.18072
4.5852	-0.180968
4.5892	-0.17949
4.59319	-0.177361
4.59719	-0.176436
4.60119	-0.17584
4.60519	-0.17464
4.60919	-0.174169
4.61319	-0.17586
4.61719	-0.176926
4.62119	-0.177152
4.62519	-0.178665
4.62919	-0.180243
4.63318	-0.181165
4.63718	-0.178413
4.64118	-0.174304
4.64518	-0.174638
4.64918	-0.175066
4.65318	-0.175576
4.65718	-0.176906
4.66118	-0.178734
4.66518	-0.183621
4.66918	-0.184843
4.67317	-0.182717
4.67718	-0.181674
4.68117	-0.180753
4.68517	-0.180986
4.68917	-0.180902
4.69317	-0.180449
4.69717	-0.180639
4.70117	-0.179894
4.70517	-0.179928
4.70917	-0.180883
4.71317	-0.180639
4.71716	-0.179403
4.72116	-0.178428
4.72516	-0.178072
4.72916	-0.178233
4.73316	-0.177177
4.73716	-0.174583
4.74116	-0.174834
4.74516	-0.176767
4.74916	-0.177101
4.75316	-0.1771
4.75716	-0.177318
4.76115	-0.176923
4.76515	-0.175857
4.76915	-0.174096
4.77315	-0.173648
4.77715	-0.174057
4.78115	-0.175126
4.78515	-0.176121
4.78915	-0.17656
4.79315	-0.178988
4.79715	-0.181183
4.80115	-0.180828
4.80515	-0.179685
4.80914	-0.1804
4.81314	-0.182696
4.81714	-0.18514
4.82114	-0.186349
4.82514	-0.186734
4.82914	-0.186941
4.83314	-0.185432
4.83714	-0.182708
4.84114	-0.178415
4.84514	-0.174134
4.84914	-0.172236
4.85313	-0.173128
4.85713	-0.175634
4.86113	-0.177288
4.86513	-0.179269
4.86913	-0.181662
4.87313	-0.183342
4.87713	-0.183918
4.88113	-0.183395
4.88513	-0.182442
4.88912	-0.182068
4.89313	-0.182154
4.89712	-0.180418
4.90112	-0.179398
4.90512	-0.179697
4.90912	-0.179928
4.91312	-0.179971
4.91712	-0.180453
4.92112	-0.181374
4.92512	-0.18069
4.92912	-0.17916
4.93311	-0.179999
4.93711	-0.181012
4.94111	-0.179943
4.94511	-0.178241
4.94911	-0.17777
4.95311	-0.176838
4.95711	-0.174946
4.96111	-0.175089
4.96511	-0.175652
4.96911	-0.175438
4.97311	-0.174928
4.9771	-0.176114
4.9811	-0.177881
4.9851	-0.17847
4.9891	-0.17816
4.9931	-0.177583
4.9971	-0.176156
5.0011	-0.175111
5.0051	-0.173206
5.0091	-0.172084
5.0131	-0.174695
5.0171	-0.173744
5.02109	-0.174164
5.02509	-0.17639
5.02909	-0.17699
5.03309	-0.174981
5.03709	-0.175519
5.04109	-0.176307
5.04509	-0.176065
5.04909	-0.176902
5.05309	-0.176388
5.05709	-0.17816
5.06109	-0.178405
5.06508	-0.17931
5.06908	-0.180203
5.07308	-0.180343
5.07708	-0.180429
5.08108	-0.184475
5.08508	-0.187235
5.08908	-0.187541
5.09308	-0.186799
5.09708	-0.185834
5.10108	-0.185515
5.10508	-0.181917
5.10907	-0.180507
5.11307	-0.180928
5.11707	-0.183534
5.12107	-0.18593
5.12507	-0.185559
5.12907	-0.187835
5.13307	-0.186932
5.13707	-0.185305
5.14107	-0.181951
5.14507	-0.181704
5.14907	-0.181577
5.15306	-0.180506
5.15706	-0.1803
5.16106	-0.184424
5.16506	-0.184404
5.16906	-0.183704
5.17306	-0.18597
5.17706	-0.184523
5.18106	-0.183703
5.18506	-0.181338
5.18906	-0.182282
5.19306	-0.18409
5.19705	-0.18259
5.20105	-0.184619
5.20505	-0.185323
5.20905	-0.186489
5.21305	-0.18669
5.21705	-0.186823
5.22105	-0.185596
5.22505	-0.184904
5.22905	-0.182971
5.23305	-0.183638
5.23705	-0.183908
5.24104	-0.183312
5.24504	-0.180477
5.24904	-0.178661
5.25304	-0.176019
5.25704	-0.17254
5.26104	-0.170216
5.26504	-0.168266
5.26904	-0.168904
5.27304	-0.169129
5.27704	-0.165689
5.28104	-0.16372
5.28503	-0.160278
5.28903	-0.157877
5.29303	-0.154111
5.29703	-0.14992
5.30103	-0.150844
5.30503	-0.152025
5.30903	-0.152066
5.31303	-0.153418
5.31703	-0.152537
5.32103	-0.154821
5.32503	-0.157734
5.32902	-0.157234
5.33302	-0.158241
5.33702	-0.15583
5.34102	-0.15652
5.34502	-0.156489
5.34902	-0.153154
5.35302	-0.151775
5.35702	-0.149076
5.36102	-0.148322
5.36502	-0.147685
5.36902	-0.148416
5.37301	-0.146459
5.37701	-0.147535
5.38101	-0.149111
5.38501	-0.152072
5.38901	-0.153648
5.39301	-0.155192
5.39701	-0.156686
5.40101	-0.156698
5.40501	-0.15977
5.409	-0.158686
5.413	-0.159084
5.417	-0.159341
5.421	-0.159393
5.425	-0.16004
5.429	-0.159252
5.433	-0.157521
5.437	-0.156973
5.441	-0.156049
5.445	-0.156511
5.449	-0.156155
5.45299	-0.155836
5.45699	-0.158034
5.46099	-0.160303
5.46499	-0.160686
5.46899	-0.158241
5.47299	-0.157006
5.47699	-0.157795
5.48099	-0.155736
5.48499	-0.155541
5.48899	-0.156842
5.49299	-0.158118
5.49698	-0.156976
5.50098	-0.155245
5.50498	-0.158663
5.50898	-0.156031
5.51298	-0.154498
5.51698	-0.150823
5.52098	-0.151414
5.52498	-0.153939
5.52898	-0.150522
5.53298	-0.148255
5.53698	-0.149144
5.54098	-0.149165
5.54497	-0.148567
5.54897	-0.148817
5.55297	-0.14993
5.55697	-0.152306
5.56097	-0.152704
5.56497	-0.151871
5.56897	-0.151804
5.57297	-0.150145
5.57697	-0.1498
5.58097	-0.148729
5.58497	-0.15159
5.58896	-0.151811
5.59296	-0.154289
5.59696	-0.155276
5.60096	-0.157487
5.60496	-0.158132
5.60896	-0.155181
5.61296	-0.154513
5.61696	-0.151253
5.62096	-0.149646
5.62496	-0.145344
5.62895	-0.143212
5.63295	-0.142198
5.63695	-0.139123
5.64095	-0.141567
5.64495	-0.144422
5.64895	-0.147057
5.65295	-0.148344
5.65695	-0.149816
5.66095	-0.150643
5.66495	-0.153158
5.66894	-0.152557
5.67295	-0.1501
5.67694	-0.148806
5.68094	-0.149378
5.68494	-0.149458
5.68894	-0.148385
5.69294	-0.147522
5.69694	-0.15059
5.70094	-0.151836
5.70494	-0.153186
5.70894	-0.153306
5.71293	-0.152747
5.71693	-0.150547
5.72093	-0.149621
5.72493	-0.148146
5.72893	-0.145052
5.73293	-0.142937
5.73693	-0.143745
5.74093	-0.146071
5.74493	-0.143517
5.74893	-0.146927
5.75293	-0.149676
5.75692	-0.152801
5.76092	-0.152443
5.76492	-0.155979
5.76892	-0.158753
5.77292	-0.162057
5.77692	-0.161981
5.78092	-0.160723
5.78492	-0.160554
5.78892	-0.160292
5.79292	-0.159362
5.79692	-0.157954
5.80091	-0.157301
5.80491	-0.157403
5.80891	-0.157635
5.81291	-0.156208
5.81691	-0.157433
5.82091	-0.157705
5.82491	-0.154471
5.82891	-0.155194
5.83291	-0.156212
5.83691	-0.153444
5.84091	-0.15342
5.8449	-0.15211
5.8489	-0.154619
5.8529	-0.154958
5.8569	-0.155232
5.8609	-0.155344
5.8649	-0.1535
5.8689	-0.153975
5.8729	-0.154464
5.8769	-0.155856
5.8809	-0.154619
5.8849	-0.156699
5.88889	-0.158966
5.89289	-0.157552
5.89689	-0.158357
5.90089	-0.157162
5.90489	-0.157765
5.90889	-0.154775
5.91289	-0.152653
5.91689	-0.15208
5.92089	-0.153198
5.92489	-0.154939
5.92889	-0.154907
5.93288	-0.157332
5.93688	-0.158244
5.94088	-0.162238
5.94488	-0.165074
5.94888	-0.16525
5.95288	-0.165199
5.95688	-0.163891
5.96088	-0.165074
5.96488	-0.163263
5.96888	-0.159963
5.97288	-0.157752
5.97687	-0.158659
5.98087	-0.160372
5.98487	-0.159769
5.98887	-0.159671
5.99287	-0.159639
5.99687	-0.160216
6.00087	-0.157945
6.00487	-0.157126
6.00887	-0.156452
6.01287	-0.153763
6.01687	-0.151187
6.02086	-0.152249
6.02486	-0.152953
6.02886	-0.153044
6.03286	-0.154078
6.03686	-0.15381
6.04086	-0.154794
6.04486	-0.153647
6.04886	-0.152993
6.05286	-0.15288
6.05686	-0.153593
6.06086	-0.157264
6.06485	-0.160863
6.06885	-0.159394
6.07285	-0.162135
6.07685	-0.164393
6.08085	-0.163482
6.08485	-0.161861
6.08885	-0.158332
6.09285	-0.160446
6.09685	-0.161421
6.10084	-0.161168
6.10485	-0.159314
6.10884	-0.160573
6.11284	-0.161327
6.11684	-0.160707
6.12084	-0.159484
6.12484	-0.157207
6.12884	-0.158037
6.13284	-0.156888
6.13684	-0.157314
6.14084	-0.154949
6.14483	-0.154825
6.14883	-0.154288
6.15283	-0.154736
6.15683	-0.155984
6.16083	-0.156036
6.16483	-0.156651
6.16883	-0.155186
6.17283	-0.157763
6.17683	-0.158817
6.18083	-0.156376
6.18483	-0.157992
6.18882	-0.156938
6.19282	-0.155587
6.19682	-0.152765
6.20082	-0.151028
6.20482	-0.153138
6.20882	-0.153916
6.21282	-0.15674
6.21682	-0.161029
6.22082	-0.165387
6.22482	-0.166329
6.22882	-0.167671
6.23282	-0.168426
6.23681	-0.168489
6.24081	-0.165191
6.24481	-0.162338
6.24881	-0.161285
6.25281	-0.161545
6.25681	-0.159133
6.26081	-0.156369
6.26481	-0.156737
6.26881	-0.157501
6.27281	-0.157528
6.27681	-0.158162
6.2808	-0.160062
6.2848	-0.162284
6.2888	-0.161875
6.2928	-0.16201
6.2968	-0.161924
6.3008	-0.159832
6.3048	-0.160289
6.3088	-0.160582
6.3128	-0.16109
6.31679	-0.161061
6.3208	-0.160373
6.32479	-0.162838
6.32879	-0.161088
6.33279	-0.160905
6.33679	-0.163041
6.34079	-0.163801
6.34479	-0.16382
6.34879	-0.163409
6.35279	-0.164678
6.35679	-0.166406
6.36078	-0.166125
6.36479	-0.16711
6.36878	-0.167903
6.37278	-0.167801
6.37678	-0.168815
6.38078	-0.169876
6.38478	-0.167244
6.38878	-0.166985
6.39278	-0.16418
6.39678	-0.167399
6.40078	-0.167189
6.40477	-0.165472
6.40877	-0.166586
6.41277	-0.165788
6.41677	-0.166094
6.42077	-0.166168
6.42477	-0.166234
6.42877	-0.16768
6.43277	-0.165283
6.43677	-0.163929
6.44077	-0.16283
6.44477	-0.161185
6.44876	-0.16116
6.45276	-0.158293
6.45676	-0.157926
6.46076	-0.156958
6.46476	-0.159666
6.46876	-0.162147
6.47276	-0.1626
6.47676	-0.16202
6.48076	-0.164484
6.48476	-0.166801
6.48876	-0.169683
6.49275	-0.166715
6.49675	-0.168185
6.50075	-0.167362
6.50475	-0.166144
6.50875	-0.165446
6.51275	-0.161527
6.51675	-0.161274
6.52075	-0.159621
6.52475	-0.159044
6.52875	-0.158611
6.53275	-0.158564
6.53674	-0.156828
6.54074	-0.159014
6.54474	-0.162495
6.54874	-0.163609
6.55274	-0.166092
6.55674	-0.16669
6.56074	-0.167622
6.56474	-0.167845
6.56874	-0.166019
6.57274	-0.167156
6.57674	-0.167913
6.58073	-0.169434
6.58473	-0.174078
6.58873	-0.175071
6.59273	-0.176522
6.59673	-0.175326
6.60073	-0.17332
6.60473	-0.175471
6.60873	-0.172344
6.61273	-0.16909
6.61673	-0.168941
6.62073	-0.170666
6.62472	-0.173261
6.62872	-0.171367
6.63272	-0.170762
6.63672	-0.168449
6.64072	-0.168422
6.64472	-0.167522
6.64872	-0.165385
6.65272	-0.165027
6.65672	-0.165924
6.66072	-0.168444
6.66472	-0.168111
6.66871	-0.16822
6.67271	-0.16846
6.67671	-0.169973
6.68071	-0.169343
6.68471	-0.168251
6.68871	-0.169831
6.69271	-0.171233
6.69671	-0.17069
6.70071	-0.172476
6.70471	-0.172194
6.70871	-0.176381
6.7127	-0.178045
6.7167	-0.179208
6.7207	-0.180369
6.7247	-0.179346
6.7287	-0.177466
6.7327	-0.174439
6.7367	-0.1707
6.7407	-0.170366
6.7447	-0.169555
6.7487	-0.168766
6.7527	-0.166912
6.75669	-0.166363
6.76069	-0.167128
[truncated: 29,232 more rows]
