# Supplementary material for: NirD curtails the stringent response by inhibiting RelA activity in Escherichia coli
Source: eLife. 2021 Jul 29;10:e64092. doi: 10.7554/eLife.64092 (PMC8321558; doi:10.7554/eLife.64092)
Supplement: Figure 5—figure supplement 1—source data 3. [file elife-64092-fig5-figsupp1-data3.xlsx]

## Sheet: Fig 5–fig sup 1–source data 3
Figure 5–figure supplement 1–source data 3. Raw data for purification of NirD
Elution volume (mL)	A280 (mAU)
-1.22537	0
-1.22137	1.57437
-1.21737	1.57167
-1.21337	1.57238
-1.20937	1.57071
-1.20537	0.917318
-1.20137	-0.000785
-1.19738	-0.001063
-1.19338	-0.001834
-1.18938	-0.002402
-1.18538	-0.002479
-1.18138	0.086411
-1.17738	0.489469
-1.17338	0.867284
-1.16938	0.869539
-1.16538	0.870115
-1.16138	0.870194
-1.15738	0.843539
-1.15338	0.467678
-1.14939	0.023894
-1.14539	0.002446
-1.14139	0.004164
-1.13739	0.005578
-1.13339	0.00588
-1.12939	0.004043
-1.12539	0.00168
-1.12139	0.000243
-1.11739	-0.002716
-1.11339	-0.004628
-1.10939	-0.002731
-1.10539	0.023571
-1.10139	0.143589
-1.0974	0.362727
-1.0934	0.598776
-1.0894	0.823773
-1.0854	1.03442
-1.0814	1.21715
-1.0774	1.30769
-1.0734	1.28142
-1.0694	1.21387
-1.0654	1.14571
-1.0614	1.08429
-1.0574	1.03584
-1.05341	0.998328
-1.04941	0.96624
-1.04541	0.939301
-1.04141	0.917955
-1.03741	0.901728
-1.03341	0.887521
-1.02941	0.873783
-1.02541	0.861352
-1.02141	0.850481
-1.01741	0.841674
-1.01341	0.830598
-1.00941	0.8181
-1.00542	0.80524
-1.00142	0.790495
-0.997417	0.774999
-0.993418	0.759386
-0.989419	0.744144
-0.98542	0.72774
-0.981421	0.710375
-0.977422	0.694892
-0.973423	0.679331
-0.969423	0.662046
-0.965424	0.644276
-0.961425	0.62581
-0.957426	0.607915
-0.953427	0.591312
-0.949428	0.574573
-0.945428	0.557132
-0.941429	0.539871
-0.93743	0.526175
-0.933431	0.511043
-0.929432	0.493545
-0.925433	0.475875
-0.921434	0.458321
-0.917434	0.440781
-0.913435	0.422989
-0.909436	0.404799
-0.905437	0.387837
-0.901438	0.371247
-0.897439	0.355705
-0.89344	0.341566
-0.88944	0.326058
-0.885441	0.314509
-0.881442	0.303173
-0.877443	0.29027
-0.873444	0.276088
-0.869445	0.259906
-0.865446	0.245743
-0.861446	0.231501
-0.857447	0.219929
-0.853448	0.212451
-0.849449	0.205557
-0.84545	0.199166
-0.841451	0.192793
-0.837452	0.185251
-0.833452	0.175921
-0.829453	0.163936
-0.825454	0.152533
-0.821455	0.143902
-0.817456	0.1387
-0.813457	0.133821
-0.809458	0.128824
-0.805458	0.125422
-0.801459	0.12067
-0.79746	0.114864
-0.793461	0.111107
-0.789462	0.111958
-0.785463	0.113769
-0.781464	0.110348
-0.777464	0.107513
-0.773465	0.10518
-0.769466	0.10196
-0.765467	0.095623
-0.761468	0.089116
-0.757469	0.087981
-0.753469	0.089041
-0.74947	0.089066
-0.745471	0.088826
-0.741472	0.090267
-0.737473	0.091559
-0.733474	0.09317
-0.729475	0.093595
-0.725475	0.095386
-0.721476	0.100829
-0.717477	0.106089
-0.713478	0.109374
-0.709479	0.112728
-0.70548	0.117861
-0.701481	0.122466
-0.697481	0.124216
-0.693482	0.125285
-0.689483	0.129126
-0.685484	0.132282
-0.681485	0.135043
-0.677486	0.139332
-0.673486	0.141015
-0.669487	0.142179
-0.665488	0.142114
-0.661489	0.143093
-0.65749	0.144869
-0.653491	0.144279
-0.649492	0.146488
-0.645492	0.148583
-0.641493	0.152179
-0.637494	0.15707
-0.633495	0.159366
-0.629496	0.159832
-0.625497	0.162341
-0.621498	0.16583
-0.617498	0.169339
-0.613499	0.170558
-0.6095	0.172209
-0.605501	0.175243
-0.601502	0.177594
-0.597503	0.180136
-0.593504	0.182276
-0.589504	0.18393
-0.585505	0.185209
-0.581506	0.186021
-0.577507	0.186593
-0.573508	0.187868
-0.569509	0.188949
-0.565509	0.189044
-0.56151	0.18844
-0.557511	0.189043
-0.553512	0.189444
-0.549513	0.190097
-0.545514	0.190369
-0.541515	0.190509
-0.537515	0.191966
-0.533516	0.193102
-0.529517	0.193246
-0.525518	0.193445
-0.521519	0.19546
-0.51752	0.199399
-0.513521	0.202318
-0.509521	0.203665
-0.505522	0.205238
-0.501523	0.205206
-0.497524	0.204945
-0.493525	0.203658
-0.489526	0.199666
-0.485527	0.196799
-0.481527	0.196061
-0.477528	0.199802
-0.473529	0.203349
-0.46953	0.205047
-0.465531	0.208864
-0.461532	0.213579
-0.457533	0.215923
-0.453533	0.214296
-0.449534	0.210245
-0.445535	0.206725
-0.441536	0.204512
-0.437537	0.203388
-0.433538	0.200961
-0.429538	0.201227
-0.425539	0.204369
-0.42154	0.206286
-0.417541	0.208827
-0.413542	0.208372
-0.409543	0.207383
-0.405544	0.20496
-0.401544	0.200547
-0.397545	0.196741
-0.393546	0.194175
-0.389547	0.192419
-0.385548	0.192024
-0.381549	0.192809
-0.37755	0.193
-0.37355	0.19423
-0.369551	0.193252
-0.365552	0.192761
-0.361553	0.194799
-0.357554	0.194892
-0.353555	0.196261
-0.349556	0.197749
-0.345556	0.196303
-0.341557	0.193592
-0.337558	0.190633
-0.333559	0.188525
-0.32956	0.185172
-0.325561	0.180957
-0.321562	0.181665
-0.317562	0.183793
-0.313563	0.184497
-0.309564	0.183275
-0.305565	0.183113
-0.301566	0.184656
-0.297567	0.1834
-0.293567	0.179787
-0.289568	0.175234
-0.285569	0.176118
-0.28157	0.176958
-0.277571	0.176033
-0.273572	0.177444
-0.269573	0.178218
-0.265573	0.180822
-0.261574	0.182181
-0.257575	0.183556
-0.253576	0.18608
-0.249577	0.187215
-0.245578	0.189554
-0.241579	0.190236
-0.237579	0.190583
-0.23358	0.189476
-0.229581	0.189149
-0.225582	0.188007
-0.221583	0.184485
-0.217584	0.182352
-0.213585	0.17978
-0.209585	0.177998
-0.205586	0.174679
-0.201587	0.169458
-0.197588	0.167822
-0.193589	0.167235
-0.18959	0.167002
-0.185591	0.166983
-0.181591	0.169879
-0.177592	0.174341
-0.173593	0.174435
-0.169594	0.172156
-0.165595	0.170069
-0.161596	0.168311
-0.157596	0.166581
-0.153597	0.164966
-0.149598	0.165447
-0.145599	0.167842
-0.1416	0.170861
-0.137601	0.172804
-0.133602	0.174858
-0.129602	0.174359
-0.125603	0.173188
-0.121604	0.173431
-0.117605	0.173229
-0.113606	0.171877
-0.109607	0.169743
-0.105608	0.167865
-0.101608	0.16792
-0.097609	0.16818
-0.09361	0.168696
-0.089611	0.169547
-0.085612	0.169035
-0.081613	0.171539
-0.077613	0.174329
-0.073614	0.174176
-0.069615	0.172273
-0.065616	0.170276
-0.061617	0.170923
-0.057618	0.170055
-0.053619	0.166776
-0.049619	0.164506
-0.04562	0.164142
-0.041621	0.164422
-0.037622	0.163577
-0.033623	0.163735
-0.029624	0.164006
-0.025625	0.16333
-0.021625	0.163447
-0.017626	0.164805
-0.013627	0.163343
-0.009628	0.161214
-0.005629	0.097561
-0.00163	0.000762
0.002369	0.002103
0.006369	0.003356
0.010368	0.00111
0.014367	0.003041
0.018366	0.005664
0.022365	0.004758
0.026364	0.00546
0.030363	0.00463
0.034363	0.005208
0.038362	0.00168
0.042361	-0.001271
0.04636	-0.003878
0.050359	-0.003304
0.054358	-0.002496
0.058357	-0.001223
0.062357	-0.001731
0.066356	-0.002441
0.070355	-0.001225
0.074354	-0.005247
0.078353	-0.008788
0.082352	-0.00967
0.086352	-0.010613
0.090351	-0.013104
0.09435	-0.012184
0.098349	-0.009741
0.102348	-0.008572
0.106347	-0.010632
0.110346	-0.011568
0.114346	-0.011832
0.118345	-0.011487
0.122344	-0.011925
0.126343	-0.01357
0.130342	-0.011894
0.134341	-0.013749
0.13834	-0.014294
0.14234	-0.013943
0.146339	-0.015577
0.150338	-0.017545
0.154337	-0.018356
0.158336	-0.015526
0.162335	-0.014142
0.166335	-0.013145
0.170334	-0.012458
0.174333	-0.012022
0.178332	-0.011833
0.182331	-0.013445
0.18633	-0.015344
0.190329	-0.017908
0.194329	-0.019216
0.198328	-0.017413
0.202327	-0.017698
0.206326	-0.01975
0.210325	-0.020906
0.214324	-0.022473
0.218323	-0.023012
0.222323	-0.020752
0.226322	-0.02032
0.230321	-0.018881
0.23432	-0.018666
0.238319	-0.016035
0.242318	-0.016109
0.246318	-0.015211
0.250317	-0.01321
0.254316	-0.012726
0.258315	-0.012096
0.262314	-0.009528
0.266313	-0.00627
0.270312	-0.003383
0.274311	-0.001991
0.278311	0.003118
0.28231	0.006867
0.286309	0.010852
0.290308	0.013308
0.294307	0.014169
0.298306	0.013348
0.302305	0.012535
0.306305	0.012008
0.310304	0.012662
0.314303	0.013007
0.318302	0.014901
0.322301	0.017519
0.3263	0.019746
0.330299	0.021329
0.334299	0.023294
0.338298	0.023821
0.342297	0.023337
0.346296	0.021968
0.350295	0.022239
0.354294	0.021082
0.358294	0.022308
0.362293	0.020503
0.366292	0.019409
0.370291	0.019969
0.37429	0.018847
0.378289	0.019846
0.382288	0.020737
0.386288	0.021573
0.390287	0.022428
0.394286	0.024518
0.398285	0.026063
0.402284	0.02727
0.406283	0.024616
0.410282	0.027169
0.414282	0.026209
0.418281	0.024347
0.42228	0.025071
0.426279	0.02405
0.430278	0.024668
0.434277	0.024821
0.438277	0.026109
0.442276	0.025899
0.446275	0.024458
0.450274	0.024472
0.454273	0.025447
0.458272	0.025205
0.462271	0.022902
0.466271	0.021712
0.47027	0.020563
0.474269	0.019135
0.478268	0.017379
0.482267	0.017778
0.486266	0.017585
0.490265	0.016959
0.494265	0.018499
0.498264	0.01738
0.502263	0.015226
0.506262	0.013024
0.510261	0.01219
0.51426	0.011982
0.51826	0.010419
0.522259	0.01097
0.526258	0.011757
0.530257	0.010868
0.534256	0.010137
0.538255	0.009594
0.542254	0.007566
0.546254	0.00683
0.550253	0.006806
0.554252	0.007978
0.558251	0.007545
0.56225	0.007115
0.566249	0.008189
0.570248	0.009993
0.574248	0.011509
0.578247	0.011032
0.582246	0.009574
0.586245	0.008568
0.590244	0.009186
0.594243	0.008618
0.598242	0.006753
0.602242	0.006311
0.606241	0.004714
0.61024	0.003858
0.614239	0.000866
0.618238	0.000917
0.622237	0.001367
0.626236	0.001721
0.630236	0.005909
0.634235	0.0078
0.638234	0.011225
0.642233	0.012182
0.646232	0.00981
0.650231	0.007185
0.65423	0.00349
0.65823	0.000522
0.662229	-0.004494
0.666228	-0.00532
0.670227	-0.004833
0.674226	-0.002025
0.678225	-0.001111
0.682225	-4.3e-05
0.686224	-0.001159
0.690223	-0.002002
0.694222	-0.002179
0.698221	-0.003711
0.70222	-0.005371
0.706219	-0.006022
0.710219	-0.005916
0.714218	-0.005865
0.718217	-0.007795
0.722216	-0.007178
0.726215	-0.004658
0.730214	-0.003987
0.734213	-0.00422
0.738213	-0.005027
0.742212	-0.00272
0.746211	-0.004563
0.75021	-0.007316
0.754209	-0.006456
0.758208	-0.007653
0.762208	-0.006651
0.766207	-0.006097
0.770206	-0.006423
0.774205	-0.007087
0.778204	-0.007491
0.782203	-0.00722
0.786202	-0.00544
0.790202	-0.005965
0.794201	-0.008299
0.7982	-0.008936
0.802199	-0.009424
0.806198	-0.010266
0.810197	-0.011962
0.814196	-0.012361
0.818195	-0.013648
0.822195	-0.015923
0.826194	-0.018222
0.830193	-0.020126
0.834192	-0.020305
0.838191	-0.022404
0.84219	-0.022381
0.84619	-0.020332
0.850189	-0.020093
0.854188	-0.019464
0.858187	-0.019179
0.862186	-0.019762
0.866185	-0.019003
0.870185	-0.021334
0.874184	-0.022946
0.878183	-0.024565
0.882182	-0.026256
0.886181	-0.026431
0.89018	-0.025528
0.894179	-0.023299
0.898178	-0.020898
0.902178	-0.017344
0.906177	-0.0132
0.910176	-0.007771
0.914175	-0.006244
0.918174	-0.00754
0.922173	-0.007396
0.926173	-0.008441
0.930172	-0.009144
0.934171	-0.013655
0.93817	-0.018846
0.942169	-0.020057
0.946168	-0.021774
0.950167	-0.023227
0.954167	-0.025053
0.958166	-0.024283
0.962165	-0.02317
0.966164	-0.02318
0.970163	-0.020287
0.974162	-0.018213
0.978161	-0.018977
0.982161	-0.020396
0.98616	-0.0202
0.990159	-0.018258
0.994158	-0.016054
0.998157	-0.016672
1.00216	-0.015091
1.00615	-0.015187
1.01015	-0.018123
1.01415	-0.0206
1.01815	-0.022585
1.02215	-0.024211
1.02615	-0.022844
1.03015	-0.02061
1.03415	-0.016489
1.03815	-0.013219
1.04215	-0.013611
1.04615	-0.014151
1.05015	-0.016822
1.05415	-0.02006
1.05814	-0.021588
1.06214	-0.022511
1.06614	-0.020682
1.07014	-0.01791
1.07414	-0.018336
1.07814	-0.020007
1.08214	-0.02217
1.08614	-0.021431
1.09014	-0.023866
1.09414	-0.027491
1.09814	-0.026521
1.10214	-0.02449
1.10613	-0.02102
1.11013	-0.018913
1.11413	-0.01722
1.11813	-0.014377
1.12213	-0.011533
1.12613	-0.009402
1.13013	-0.011286
1.13413	-0.013355
1.13813	-0.013585
1.14213	-0.014228
1.14613	-0.016539
1.15013	-0.018469
1.15412	-0.021429
1.15812	-0.024629
1.16212	-0.025025
1.16612	-0.024384
1.17012	-0.025579
1.17412	-0.024039
1.17812	-0.024765
1.18212	-0.025561
1.18612	-0.027672
1.19012	-0.030325
1.19412	-0.029996
1.19812	-0.029694
1.20211	-0.02872
1.20611	-0.027286
1.21011	-0.024043
1.21411	-0.024776
1.21811	-0.025418
1.22211	-0.026834
1.22611	-0.029281
1.23011	-0.03135
1.23411	-0.032663
1.23811	-0.03279
1.24211	-0.031478
1.2461	-0.028242
1.2501	-0.026167
1.2541	-0.025886
1.2581	-0.026667
1.2621	-0.026184
1.2661	-0.025111
1.2701	-0.026695
1.2741	-0.028699
1.2781	-0.029087
1.2821	-0.027469
1.2861	-0.028352
1.29009	-0.029709
1.29409	-0.02739
1.29809	-0.027127
1.30209	-0.026234
1.30609	-0.02451
1.31009	-0.024103
1.31409	-0.023316
1.31809	-0.025276
1.32209	-0.023587
1.32609	-0.021564
1.33009	-0.021938
1.33409	-0.02144
1.33808	-0.019132
1.34208	-0.01929
1.34608	-0.020675
1.35008	-0.023732
1.35408	-0.023506
1.35808	-0.022768
1.36208	-0.021522
1.36608	-0.021461
1.37008	-0.021928
1.37408	-0.018725
1.37808	-0.018671
1.38207	-0.018043
1.38607	-0.019463
1.39007	-0.018028
1.39407	-0.016609
1.39807	-0.01541
1.40207	-0.015638
1.40607	-0.016938
1.41007	-0.017318
1.41407	-0.018614
1.41807	-0.020825
1.42207	-0.022713
1.42607	-0.025444
1.43006	-0.026102
1.43406	-0.025333
1.43806	-0.023691
1.44206	-0.025668
1.44606	-0.026926
1.45006	-0.025871
1.45406	-0.024444
1.45806	-0.024934
1.46206	-0.026107
1.46606	-0.024534
1.47006	-0.02238
1.47406	-0.021162
1.47805	-0.021125
1.48205	-0.0217
1.48605	-0.022018
1.49005	-0.022405
1.49405	-0.023572
1.49805	-0.024762
1.50205	-0.026568
1.50605	-0.026193
1.51005	-0.025872
1.51405	-0.025686
1.51805	-0.024639
1.52205	-0.023528
1.52605	-0.022924
1.53004	-0.022873
1.53404	-0.02303
1.53804	-0.025079
1.54204	-0.026326
1.54604	-0.025904
1.55004	-0.025969
1.55404	-0.025191
1.55804	-0.026857
1.56204	-0.026853
1.56604	-0.026826
1.57004	-0.029259
1.57403	-0.030958
1.57803	-0.031587
1.58203	-0.029578
1.58603	-0.027184
1.59003	-0.028602
1.59403	-0.028263
1.59803	-0.027975
1.60203	-0.029072
1.60603	-0.029271
1.61003	-0.027817
1.61403	-0.025822
1.61803	-0.023227
1.62202	-0.021289
1.62602	-0.020125
1.63002	-0.020446
1.63402	-0.022219
1.63802	-0.024195
1.64202	-0.022618
1.64602	-0.023863
1.65002	-0.025668
1.65402	-0.026095
1.65802	-0.027612
1.66202	-0.028143
1.66602	-0.028889
1.67001	-0.026904
1.67401	-0.024285
1.67801	-0.022718
1.68201	-0.020291
1.68601	-0.016962
1.69001	-0.015558
1.69401	-0.01392
1.69801	-0.013276
1.70201	-0.012501
1.70601	-0.012295
1.71	-0.013019
1.71401	-0.012585
1.718	-0.016072
1.722	-0.017885
1.726	-0.017825
1.73	-0.01558
1.734	-0.016227
1.738	-0.015151
1.742	-0.013268
1.746	-0.013796
1.75	-0.01463
1.754	-0.015402
1.75799	-0.016599
1.76199	-0.018185
1.76599	-0.017839
1.76999	-0.016843
1.77399	-0.014573
1.77799	-0.012712
1.78199	-0.010976
1.78599	-0.011424
1.78999	-0.013229
1.79399	-0.01453
1.79799	-0.015047
1.80199	-0.016919
1.80598	-0.016453
1.80998	-0.014378
1.81398	-0.011972
1.81798	-0.010455
1.82198	-0.01054
1.82598	-0.008472
1.82998	-0.009421
1.83398	-0.01191
1.83798	-0.012682
1.84198	-0.010668
1.84598	-0.010781
1.84998	-0.012381
1.85397	-0.011375
1.85797	-0.009828
1.86197	-0.00751
1.86597	-0.007748
1.86997	-0.008383
1.87397	-0.007818
1.87797	-0.007433
1.88197	-0.00714
1.88597	-0.006979
1.88997	-0.008137
1.89397	-0.010895
1.89796	-0.011742
1.90196	-0.010806
1.90596	-0.009468
1.90996	-0.008999
1.91396	-0.0099
1.91796	-0.009506
1.92196	-0.008314
1.92596	-0.008396
1.92996	-0.008503
1.93396	-0.009739
1.93796	-0.007872
1.94196	-0.005419
1.94596	-0.001906
1.94995	0.001366
1.95395	0.003777
1.95795	0.005505
1.96195	0.003986
1.96595	0.002807
1.96995	-0.001572
1.97395	-0.004072
1.97795	-0.003681
1.98195	-0.00107
1.98595	0.000744
1.98995	0.001667
1.99395	0.003107
1.99794	0.004931
2.00194	0.005091
2.00594	0.00352
2.00994	0.002458
2.01394	0.003971
2.01794	0.005275
2.02194	0.002932
2.02594	-0.000221
2.02994	-0.000427
2.03394	-3.9e-05
2.03794	-0.001519
2.04193	-0.001402
2.04593	0.001199
2.04993	0.001745
2.05393	0.001906
2.05793	0.001701
2.06193	0.001439
2.06593	0.001532
2.06993	0.00168
2.07393	0.003263
2.07793	0.00473
2.08193	0.004671
2.08593	0.006205
2.08992	0.00532
2.09392	0.002656
2.09792	0.002462
2.10192	0.001663
2.10592	-0.000363
2.10992	-0.002122
2.11392	-0.00286
2.11792	-0.000785
2.12192	-0.001146
2.12592	-0.000411
2.12992	0.001539
2.13392	0.002301
2.13791	0.002996
2.14191	0.003144
2.14591	0.00352
2.14991	0.003004
2.15391	0.003623
2.15791	0.003433
2.16191	0.002405
2.16591	0.002362
2.16991	0.002254
2.17391	0.001827
2.17791	-0.000488
2.1819	-0.001124
2.1859	-0.001264
2.1899	-0.00138
2.1939	0.000604
2.1979	0.002153
2.2019	0.003276
2.2059	0.005908
2.2099	0.00651
2.2139	0.006493
2.2179	0.00518
2.2219	0.003794
2.22589	0.00642
2.22989	0.006031
2.23389	0.005873
2.23789	0.003954
2.24189	0.005408
2.24589	0.006523
2.24989	0.006161
2.25389	0.00678
2.25789	0.008262
2.26189	0.010272
2.26589	0.010263
2.26989	0.008599
2.27388	0.007906
2.27788	0.00866
2.28188	0.008481
2.28588	0.009498
2.28988	0.012111
2.29388	0.012128
2.29788	0.013499
2.30188	0.014494
2.30588	0.015032
2.30988	0.01283
2.31388	0.011021
2.31788	0.010048
2.32187	0.010952
2.32587	0.010592
2.32987	0.010383
2.33387	0.010341
2.33787	0.011242
2.34187	0.014233
2.34587	0.015011
2.34987	0.016503
2.35387	0.01708
2.35787	0.017444
2.36187	0.01897
2.36587	0.017424
2.36986	0.017097
2.37386	0.016253
2.37786	0.015623
2.38186	0.013528
2.38586	0.010918
2.38986	0.010891
2.39386	0.011473
2.39786	0.011771
2.40186	0.012322
2.40586	0.012702
2.40986	0.014801
2.41386	0.015711
2.41785	0.015478
2.42185	0.015413
2.42585	0.016247
2.42985	0.017326
2.43385	0.019945
2.43785	0.020305
2.44185	0.022062
2.44585	0.02374
2.44985	0.022472
2.45385	0.021626
2.45785	0.022636
2.46184	0.022989
2.46584	0.023571
2.46984	0.025058
2.47384	0.025631
2.47784	0.026211
2.48184	0.025971
2.48584	0.025262
2.48984	0.023874
2.49384	0.021931
2.49784	0.020612
2.50184	0.020996
2.50584	0.021013
2.50983	0.021889
2.51383	0.022126
2.51783	0.023236
2.52183	0.024686
2.52583	0.024984
2.52983	0.022903
2.53383	0.021795
2.53783	0.022077
2.54183	0.022704
2.54583	0.022623
2.54983	0.024085
2.55382	0.024224
2.55782	0.024875
2.56182	0.024587
2.56582	0.025944
2.56982	0.025826
2.57382	0.025497
2.57782	0.027351
2.58182	0.02794
2.58582	0.029186
2.58982	0.025941
2.59382	0.024651
2.59782	0.026194
2.60182	0.026176
2.60581	0.025871
2.60981	0.025811
2.61381	0.028592
2.61781	0.031541
2.62181	0.029182
2.62581	0.030168
2.62981	0.029593
2.63381	0.028588
2.63781	0.026462
2.64181	0.02606
2.64581	0.027465
2.64981	0.027564
2.6538	0.029716
2.6578	0.032632
2.6618	0.035012
2.6658	0.036485
2.6698	0.036781
2.6738	0.036611
2.6778	0.035546
2.6818	0.035248
2.6858	0.032594
2.6898	0.030424
2.6938	0.030354
2.6978	0.030972
2.70179	0.031826
2.70579	0.033707
2.70979	0.034756
2.71379	0.035044
2.71779	0.03622
2.72179	0.035367
2.72579	0.035024
2.72979	0.033788
2.73379	0.034166
2.73779	0.037447
2.74179	0.037739
2.74579	0.039042
2.74978	0.038916
2.75378	0.039751
2.75778	0.039145
2.76178	0.037836
2.76578	0.036189
2.76978	0.036009
2.77378	0.037418
2.77778	0.037907
2.78178	0.038557
2.78578	0.037842
2.78978	0.037629
2.79377	0.039306
2.79777	0.03936
2.80177	0.039116
2.80577	0.037121
2.80977	0.036559
2.81377	0.034838
2.81777	0.033577
2.82177	0.033089
2.82577	0.032884
2.82977	0.034527
2.83377	0.035537
2.83777	0.036781
2.84176	0.038586
2.84576	0.039271
2.84976	0.038383
2.85376	0.040934
2.85776	0.041441
2.86176	0.041136
2.86576	0.039842
2.86976	0.040092
2.87376	0.040478
2.87776	0.039885
2.88176	0.040073
2.88576	0.041634
2.88975	0.044382
2.89375	0.046451
2.89775	0.046152
2.90175	0.046597
2.90575	0.04786
2.90975	0.04741
2.91375	0.045881
2.91775	0.045631
2.92175	0.046197
2.92575	0.046361
2.92975	0.048007
2.93374	0.050575
2.93774	0.052581
2.94174	0.054325
2.94574	0.055663
2.94974	0.055678
2.95374	0.05347
2.95774	0.049824
2.96174	0.048123
2.96574	0.047619
2.96974	0.046074
2.97374	0.047585
2.97774	0.048987
2.98173	0.048383
2.98573	0.047023
2.98973	0.046178
2.99373	0.04522
2.99773	0.042047
3.00173	0.039224
3.00573	0.039469
3.00973	0.039718
3.01373	0.039193
3.01773	0.040859
3.02173	0.041689
3.02572	0.044053
3.02972	0.046697
3.03372	0.048616
3.03772	0.049692
3.04172	0.047778
3.04572	0.047542
3.04972	0.047193
3.05372	0.047544
3.05772	0.045944
3.06172	0.044557
3.06572	0.046403
3.06971	0.047226
3.07371	0.047453
3.07771	0.047093
3.08171	0.047276
3.08571	0.048896
3.08971	0.050438
3.09371	0.050837
3.09771	0.052517
3.10171	0.052368
3.10571	0.053826
3.10971	0.055971
3.11371	0.056935
3.1177	0.056625
3.1217	0.055684
3.1257	0.053838
3.1297	0.052946
3.1337	0.052391
3.1377	0.051496
3.1417	0.052274
3.1457	0.053412
3.1497	0.0532
3.1537	0.052924
3.1577	0.051823
3.1617	0.048948
3.16569	0.047825
3.16969	0.047714
3.17369	0.048702
3.17769	0.050221
3.18169	0.051572
3.18569	0.052779
3.18969	0.052128
3.19369	0.050955
3.19769	0.04957
3.20169	0.049622
3.20569	0.050659
3.20969	0.050642
3.21368	0.053368
3.21768	0.055037
3.22168	0.056371
3.22568	0.057906
3.22968	0.055877
3.23368	0.055489
3.23768	0.054002
3.24168	0.052511
3.24568	0.050423
3.24968	0.049198
3.25368	0.049252
3.25768	0.048639
3.26167	0.048034
3.26567	0.048847
3.26967	0.052005
3.27367	0.052623
3.27767	0.053781
3.28167	0.055708
3.28567	0.055875
3.28967	0.056658
3.29367	0.055278
3.29767	0.053352
3.30167	0.051819
3.30566	0.050672
3.30966	0.050672
3.31366	0.049959
3.31766	0.049038
3.32166	0.048195
3.32566	0.048578
3.32966	0.049019
3.33366	0.049744
3.33766	0.051352
3.34166	0.051112
3.34566	0.049697
3.34966	0.049998
3.35365	0.049948
3.35765	0.049141
3.36165	0.048897
3.36565	0.049083
3.36965	0.049673
3.37365	0.049814
3.37765	0.051568
3.38165	0.05386
3.38565	0.055704
3.38965	0.057156
3.39365	0.058369
3.39764	0.059464
3.40164	0.058524
3.40564	0.056983
3.40964	0.055849
3.41364	0.055919
3.41764	0.057768
3.42164	0.058915
3.42564	0.060931
3.42964	0.063174
3.43364	0.062303
3.43764	0.062504
3.44164	0.061443
3.44563	0.059126
3.44963	0.056641
3.45363	0.053528
3.45763	0.052119
3.46163	0.051824
3.46563	0.051534
3.46963	0.053347
3.47363	0.053766
3.47763	0.056384
3.48163	0.058836
3.48563	0.058614
3.48963	0.058565
3.49363	0.058409
3.49762	0.058373
3.50162	0.057191
3.50562	0.055145
3.50962	0.054794
3.51362	0.055512
3.51762	0.056792
3.52162	0.056973
3.52562	0.057537
3.52962	0.057685
3.53362	0.059559
3.53762	0.060939
3.54162	0.059496
3.54561	0.058373
3.54961	0.058587
3.55361	0.057531
3.55761	0.056072
3.56161	0.053897
3.56561	0.054205
3.56961	0.054238
3.57361	0.053352
3.57761	0.052504
3.58161	0.053149
3.58561	0.055488
3.58961	0.057649
3.5936	0.05832
3.5976	0.059266
3.6016	0.060633
3.6056	0.061461
3.6096	0.060589
3.6136	0.059978
3.6176	0.05876
3.6216	0.057529
3.6256	0.056827
3.6296	0.058542
3.6336	0.060587
3.6376	0.061762
3.64159	0.064422
3.64559	0.066505
3.64959	0.067623
3.65359	0.06687
3.65759	0.065023
3.66159	0.06567
3.66559	0.066899
3.66959	0.068188
3.67359	0.069478
3.67759	0.069744
3.68159	0.069991
3.68558	0.069037
3.68958	0.068771
3.69358	0.068965
3.69758	0.067457
3.70158	0.065227
3.70558	0.063925
3.70958	0.064493
3.71358	0.064659
3.71758	0.06309
3.72158	0.061685
3.72558	0.063416
3.72958	0.066007
3.73357	0.06671
3.73757	0.066604
3.74157	0.064432
3.74557	0.06241
3.74957	0.063282
3.75357	0.063768
3.75757	0.063238
3.76157	0.06209
3.76557	0.061767
3.76957	0.063762
3.77357	0.06599
3.77757	0.06534
3.78156	0.064383
3.78556	0.06448
3.78956	0.065803
3.79356	0.066949
3.79756	0.067052
3.80156	0.069151
3.80556	0.070414
3.80956	0.073692
3.81356	0.073376
3.81756	0.072085
3.82156	0.070175
3.82555	0.068068
3.82955	0.064997
3.83355	0.061536
3.83755	0.061547
3.84155	0.062352
3.84555	0.064259
3.84955	0.066141
3.85355	0.065787
3.85755	0.066875
3.86155	0.067568
3.86555	0.066778
3.86955	0.06562
3.87354	0.066568
3.87754	0.066612
3.88154	0.06484
3.88554	0.064735
3.88954	0.064866
3.89354	0.064893
3.89754	0.065244
3.90154	0.065484
3.90554	0.06661
3.90954	0.067624
3.91354	0.066695
3.91753	0.065745
3.92153	0.06403
3.92553	0.062008
3.92953	0.062467
3.93353	0.062729
3.93753	0.062081
3.94153	0.062614
3.94553	0.063463
3.94953	0.063196
3.95353	0.061762
3.95753	0.061266
3.96152	0.060074
3.96552	0.058433
3.96952	0.058015
3.97352	0.059448
3.97752	0.061792
3.98152	0.062346
3.98552	0.063538
3.98952	0.064103
3.99352	0.063837
3.99752	0.063091
4.00152	0.062442
4.00552	0.063038
4.00952	0.063174
4.01351	0.066062
4.01751	0.067336
4.02151	0.066516
4.02551	0.066269
4.02951	0.066169
4.03351	0.062881
4.03751	0.059771
4.04151	0.058794
4.04551	0.059645
4.04951	0.060384
4.05351	0.060051
4.0575	0.060883
4.0615	0.06122
4.0655	0.062824
4.0695	0.062589
4.0735	0.06106
4.0775	0.061393
4.0815	0.06064
4.0855	0.060312
4.0895	0.057438
4.0935	0.055032
4.0975	0.056764
4.1015	0.056373
4.10549	0.056737
4.10949	0.057155
4.11349	0.057404
4.11749	0.058175
4.12149	0.056138
4.12549	0.055969
4.12949	0.057413
4.13349	0.059023
4.13749	0.059657
4.14149	0.061447
4.14549	0.063603
4.14949	0.065112
4.15348	0.066359
4.15748	0.066001
4.16148	0.06636
4.16548	0.065093
4.16948	0.06293
4.17348	0.063314
4.17748	0.061976
4.18148	0.060909
4.18548	0.061444
4.18948	0.063316
4.19348	0.064304
4.19747	0.064709
4.20147	0.065229
4.20547	0.065559
4.20947	0.06627
4.21347	0.067225
4.21747	0.068911
4.22147	0.070649
4.22547	0.070935
4.22947	0.072021
4.23347	0.071473
4.23747	0.070538
4.24147	0.070263
4.24547	0.069676
4.24946	0.068598
4.25346	0.068058
4.25746	0.066582
4.26146	0.065302
4.26546	0.064906
4.26946	0.063621
4.27346	0.063782
4.27746	0.064272
4.28146	0.063976
4.28546	0.064598
4.28946	0.065152
4.29345	0.064791
4.29745	0.063159
4.30145	0.061997
4.30545	0.062455
4.30945	0.064013
4.31345	0.064953
4.31745	0.065527
4.32145	0.06711
4.32545	0.068012
4.32945	0.068995
4.33345	0.069584
4.33744	0.068647
4.34144	0.067071
4.34544	0.066071
4.34944	0.066512
4.35344	0.067645
4.35744	0.067985
4.36144	0.068494
4.36544	0.068569
4.36944	0.070367
4.37344	0.072279
4.37744	0.071275
4.38144	0.071685
4.38544	0.070216
4.38943	0.069485
4.39343	0.071424
4.39743	0.071701
4.40143	0.07265
4.40543	0.070548
4.40943	0.070401
4.41343	0.072537
4.41743	0.072751
4.42143	0.071935
4.42543	0.071348
4.42943	0.072666
4.43342	0.074778
4.43742	0.076755
4.44142	0.077046
4.44542	0.075345
4.44942	0.073517
4.45342	0.070387
4.45742	0.067759
4.46142	0.064603
4.46542	0.060883
4.46942	0.059722
4.47342	0.059787
4.47742	0.060296
4.48142	0.061108
4.48541	0.061194
4.48941	0.060407
4.49341	0.059389
4.49741	0.057714
4.50141	0.055457
4.50541	0.052998
4.50941	0.052623
4.51341	0.052819
4.51741	0.0501
4.52141	0.048668
4.52541	0.04976
4.5294	0.0504
4.5334	0.04975
4.5374	0.050419
4.5414	0.05272
4.5454	0.054857
4.5494	0.055672
4.5534	0.057071
4.5574	0.059181
4.5614	0.059416
4.5654	0.061174
4.5694	0.061198
4.57339	0.062114
4.57739	0.062497
4.58139	0.062039
4.58539	0.061939
4.58939	0.059469
4.59339	0.058154
4.59739	0.05758
4.60139	0.057052
4.60539	0.0561
4.60939	0.0567
4.61339	0.058584
4.61738	0.058701
4.62139	0.05901
4.62538	0.060609
4.62938	0.063478
4.63338	0.063536
4.63738	0.062058
4.64138	0.062438
4.64538	0.062464
4.64938	0.061544
4.65338	0.060644
4.65738	0.059628
4.66138	0.059186
4.66538	0.058158
4.66937	0.057706
4.67337	0.058132
4.67737	0.059348
4.68137	0.060449
4.68537	0.061723
4.68937	0.063705
4.69337	0.065167
4.69737	0.063537
4.70137	0.063258
4.70537	0.063426
4.70937	0.062178
4.71336	0.062039
4.71736	0.061446
4.72136	0.060435
4.72536	0.060141
4.72936	0.059437
4.73336	0.058885
4.73736	0.058646
4.74136	0.058423
4.74536	0.060554
4.74936	0.06397
4.75336	0.065749
4.75736	0.064846
4.76136	0.062978
4.76535	0.062586
4.76935	0.061874
4.77335	0.059965
4.77735	0.057013
4.78135	0.05621
4.78535	0.057368
4.78935	0.057629
4.79335	0.057373
4.79735	0.057133
4.80135	0.057816
4.80535	0.057355
4.80935	0.054803
4.81334	0.053499
4.81734	0.053958
4.82134	0.054342
4.82534	0.054322
4.82934	0.054127
4.83334	0.055806
4.83734	0.057735
4.84134	0.059531
4.84534	0.060184
4.84934	0.060926
4.85334	0.059929
4.85733	0.059087
4.86133	0.058841
4.86533	0.05689
4.86933	0.057461
4.87333	0.057604
4.87733	0.05723
4.88133	0.058964
4.88533	0.05943
4.88933	0.059203
4.89333	0.061104
4.89733	0.063095
4.90132	0.062681
4.90532	0.06099
4.90932	0.059903
4.91332	0.061105
4.91732	0.058528
4.92132	0.054547
4.92532	0.054478
4.92932	0.056135
4.93332	0.055775
4.93732	0.053852
4.94132	0.054952
4.94532	0.056379
4.94932	0.056293
4.95331	0.054977
4.95731	0.054833
4.96131	0.056052
4.96531	0.055994
4.96931	0.056774
4.97331	0.058164
4.97731	0.058104
4.98131	0.057073
4.98531	0.056575
4.98931	0.057402
4.99331	0.057294
4.9973	0.05908
5.0013	0.060147
5.0053	0.060754
5.0093	0.059049
5.0133	0.061216
5.0173	0.061339
5.0213	0.063137
5.0253	0.065408
5.0293	0.066309
5.0333	0.06828
5.0373	0.066236
5.04129	0.067137
5.04529	0.064459
5.04929	0.061772
5.05329	0.060632
5.05729	0.060401
5.06129	0.061506
5.06529	0.061625
5.06929	0.061523
5.07329	0.060074
5.07729	0.058717
5.08129	0.058177
5.08529	0.05487
5.08929	0.05354
5.09328	0.056179
5.09728	0.058843
5.10128	0.059816
5.10528	0.059484
5.10928	0.060298
5.11328	0.062128
5.11728	0.062003
5.12128	0.060733
5.12528	0.061588
5.12928	0.062559
5.13328	0.06202
5.13727	0.060851
5.14127	0.061188
5.14527	0.05895
5.14927	0.058974
5.15327	0.057345
5.15727	0.058277
5.16127	0.056792
5.16527	0.055279
5.16927	0.052644
5.17327	0.055836
5.17727	0.056972
5.18126	0.05338
5.18527	0.051859
5.18926	0.055945
5.19326	0.058025
5.19726	0.056894
5.20126	0.056166
5.20526	0.058423
5.20926	0.059933
5.21326	0.059812
5.21726	0.058973
5.22126	0.058927
5.22526	0.056672
5.22926	0.058051
5.23325	0.058042
5.23725	0.056618
5.24125	0.055359
5.24525	0.055017
5.24925	0.054127
5.25325	0.055121
5.25725	0.058497
5.26125	0.057751
5.26525	0.06091
5.26925	0.064747
5.27325	0.067255
5.27724	0.068186
5.28124	0.06793
5.28524	0.071646
5.28924	0.072272
5.29324	0.074399
5.29724	0.07475
5.30124	0.078145
5.30524	0.080397
5.30924	0.081349
5.31324	0.080615
5.31724	0.079497
5.32124	0.081844
5.32524	0.082517
5.32923	0.083124
5.33323	0.082683
5.33723	0.083488
5.34123	0.085413
5.34523	0.086974
5.34923	0.084558
5.35323	0.085158
5.35723	0.087809
5.36123	0.091049
5.36523	0.091945
5.36923	0.087674
5.37322	0.087324
5.37722	0.089656
5.38122	0.088236
5.38522	0.085503
5.38922	0.086212
5.39322	0.08788
5.39722	0.090752
5.40122	0.092561
5.40522	0.091922
5.40922	0.092881
5.41322	0.095312
5.41721	0.09418
5.42121	0.093899
5.42521	0.093161
5.42921	0.09408
5.43321	0.094791
5.43721	0.094105
5.44121	0.094907
5.44521	0.093553
5.44921	0.093176
5.45321	0.092779
5.45721	0.094481
5.46121	0.092505
5.46521	0.093212
5.4692	0.095593
5.4732	0.097584
5.4772	0.098144
5.4812	0.097078
5.4852	0.09727
5.4892	0.097304
5.4932	0.095002
5.4972	0.092388
5.5012	0.093884
5.5052	0.095621
5.5092	0.097259
5.51319	0.097406
5.51719	0.095745
5.52119	0.094679
5.52519	0.090742
5.52919	0.088108
5.53319	0.086019
5.53719	0.087342
5.54119	0.089964
5.54519	0.091903
5.54919	0.09372
5.55319	0.096195
5.55718	0.098482
5.56118	0.096881
5.56518	0.094366
5.56918	0.094543
5.57318	0.095124
5.57718	0.093489
5.58118	0.091264
5.58518	0.09267
5.58918	0.09431
5.59318	0.093345
5.59718	0.094445
5.60118	0.094528
5.60518	0.09578
5.60917	0.093736
5.61317	0.092378
5.61717	0.093216
5.62117	0.091634
5.62517	0.090458
5.62917	0.090245
5.63317	0.089916
5.63717	0.089279
5.64117	0.090859
5.64517	0.089526
5.64917	0.09022
5.65317	0.08804
5.65716	0.08857
5.66116	0.089148
5.66516	0.088396
5.66916	0.08754
5.67316	0.085337
5.67716	0.085711
5.68116	0.086019
5.68516	0.083066
5.68916	0.081566
5.69316	0.079693
5.69716	0.078657
5.70115	0.078807
5.70515	0.079956
5.70915	0.082486
5.71315	0.083015
5.71715	0.084481
5.72115	0.087352
5.72515	0.091208
5.72915	0.090726
5.73315	0.088805
5.73715	0.088408
5.74115	0.090547
5.74514	0.091408
5.74915	0.088346
5.75314	0.088435
5.75714	0.090688
5.76114	0.089271
5.76514	0.085324
5.76914	0.084628
5.77314	0.086452
5.77714	0.086018
5.78114	0.083449
5.78514	0.083508
5.78914	0.084495
5.79314	0.084045
5.79713	0.081124
5.80113	0.081052
5.80513	0.082013
5.80913	0.079706
5.81313	0.081609
5.81713	0.081749
5.82113	0.086508
5.82513	0.086913
5.82913	0.084754
5.83313	0.084403
5.83713	0.082085
5.84112	0.082828
5.84512	0.083764
5.84912	0.082407
5.85312	0.0831
5.85712	0.08564
5.86112	0.087684
5.86512	0.085713
5.86912	0.083273
5.87312	0.081975
5.87712	0.08157
5.88112	0.080492
5.88512	0.079326
5.88911	0.077876
5.89311	0.078941
5.89711	0.080814
5.90111	0.079869
5.90511	0.080061
5.90911	0.078311
5.91311	0.080917
5.91711	0.082998
5.92111	0.083461
5.92511	0.08393
5.92911	0.086114
5.93311	0.088648
5.9371	0.088618
5.9411	0.087555
5.9451	0.086341
5.9491	0.086618
5.9531	0.085004
5.9571	0.080632
5.9611	0.08001
5.9651	0.079202
5.9691	0.080959
5.9731	0.084275
5.9771	0.084345
5.98109	0.083523
5.98509	0.085678
5.98909	0.084167
5.99309	0.080876
5.99709	0.078406
6.00109	0.078211
6.00509	0.079876
6.00909	0.076027
6.01309	0.075417
6.01709	0.07531
6.02109	0.074745
6.02508	0.074896
6.02909	0.077564
6.03308	0.07732
6.03708	0.078454
6.04108	0.080426
6.04508	0.080254
6.04908	0.078498
6.05308	0.075606
6.05708	0.076843
6.06108	0.079067
6.06508	0.080285
6.06908	0.078779
6.07308	0.080779
6.07707	0.080642
6.08107	0.078252
6.08507	0.076591
6.08907	0.0762
6.09307	0.075668
6.09707	0.073749
6.10107	0.075304
6.10507	0.076785
6.10907	0.075464
6.11307	0.074157
6.11707	0.075512
6.12106	0.076527
6.12506	0.07474
6.12906	0.0773
6.13306	0.080648
6.13706	0.08325
6.14106	0.081736
6.14506	0.08155
6.14906	0.079829
6.15306	0.079998
6.15706	0.077456
6.16106	0.073971
6.16506	0.073096
6.16906	0.073008
6.17305	0.073213
6.17705	0.073085
6.18105	0.071425
6.18505	0.071792
6.18905	0.071401
6.19305	0.073093
6.19705	0.073085
6.20105	0.072639
6.20505	0.07263
6.20905	0.07388
6.21305	0.074029
6.21704	0.070107
6.22104	0.070582
6.22504	0.070324
6.22904	0.069036
6.23304	0.068204
6.23704	0.06984
6.24104	0.072358
6.24504	0.072627
6.24904	0.074563
6.25304	0.07624
6.25704	0.075842
6.26103	0.075268
6.26503	0.074918
6.26903	0.075093
6.27303	0.075545
6.27703	0.072122
6.28103	0.073988
6.28503	0.076489
6.28903	0.077699
6.29303	0.077276
6.29703	0.07741
6.30103	0.080308
6.30503	0.08352
6.30903	0.081788
6.31302	0.081308
6.31702	0.082134
6.32102	0.080066
6.32502	0.079075
6.32902	0.075894
6.33302	0.078221
6.33702	0.07886
6.34102	0.078011
6.34502	0.078796
6.34902	0.080194
6.35302	0.080849
6.35701	0.080393
6.36101	0.077328
6.36501	0.078764
6.36901	0.078759
6.37301	0.079438
6.37701	0.079226
6.38101	0.079272
6.38501	0.080554
6.38901	0.079463
6.39301	0.076282
6.39701	0.077256
6.401	0.076652
6.40501	0.07691
6.409	0.07447
6.413	0.076324
6.417	0.076951
6.421	0.076353
6.425	0.07639
6.429	0.075864
6.433	0.074423
6.437	0.073467
6.441	0.075582
6.445	0.073113
6.449	0.072617
6.45299	0.072463
6.45699	0.074566
6.46099	0.074863
6.46499	0.073508
6.46899	0.0732
6.47299	0.071825
6.47699	0.072934
6.48099	0.072231
6.48499	0.069298
6.48899	0.07147
6.49299	0.073215
6.49698	0.074893
6.50098	0.072828
6.50498	0.074753
6.50898	0.075877
6.51298	0.074611
6.51698	0.076481
6.52098	0.076641
6.52498	0.078094
6.52898	0.077619
6.53298	0.078944
6.53698	0.076024
6.54098	0.07702
6.54497	0.077975
6.54897	0.077262
6.55297	0.078066
6.55697	0.078505
6.56097	0.079613
6.56497	0.077648
6.56897	0.076903
6.57297	0.077482
6.57697	0.075506
6.58097	0.075197
6.58497	0.073415
6.58896	0.071827
6.59297	0.071003
6.59696	0.070829
6.60096	0.07128
6.60496	0.069019
6.60896	0.070043
6.61296	0.071494
6.61696	0.071605
6.62096	0.075045
6.62496	0.073785
6.62896	0.074503
6.63296	0.072819
6.63696	0.073564
6.64095	0.070717
6.64495	0.067313
6.64895	0.066257
6.65295	0.068299
6.65695	0.067203
6.66095	0.065336
6.66495	0.065675
6.66895	0.068685
6.67295	0.071571
6.67695	0.070949
6.68095	0.073901
6.68494	0.074708
6.68894	0.07635
6.69294	0.07579
6.69694	0.074225
6.70094	0.075715
6.70494	0.075346
6.70894	0.074566
6.71294	0.073997
6.71694	0.073766
6.72094	0.072902
6.72494	0.072129
6.72894	0.07311
6.73293	0.076274
6.73693	0.077483
6.74093	0.077375
6.74493	0.076837
6.74893	0.076668
6.75293	0.075692
6.75693	0.073841
6.76093	0.073812
[truncated: 32,232 more rows]
