# Supplementary material for: NirD curtails the stringent response by inhibiting RelA activity in Escherichia coli
Source: eLife. 2021 Jul 29;10:e64092. doi: 10.7554/eLife.64092 (PMC8321558; doi:10.7554/eLife.64092)
Supplement: Figure 5—figure supplement 1—source data 5. [file elife-64092-fig5-figsupp1-data5.xlsx]

## Sheet: Fig 5–fig sup 1–source data 5
Figure 5–figure supplement 1–source data 5. Raw data for purification of NirDE50K
Elution volume (mL)	A280 (mAU)
-1.22532	0
-1.22132	0.237731
-1.21732	0.25604
-1.21333	0.254809
-1.20933	0.254035
-1.20533	0.14646
-1.20133	0.000958
-1.19733	1.8e-05
-1.19333	-0.001064
-1.18933	0.001354
-1.18533	0.004147
-1.18133	0.004423
-1.17733	0.00515
-1.17334	0.007995
-1.16934	0.001673
-1.16534	-0.027407
-1.16134	-0.069877
-1.15734	-0.116921
-1.15334	-0.163936
-1.14934	-0.214097
-1.14534	-0.249918
-1.14134	-0.227723
-1.13734	-0.196948
-1.13334	-0.204363
-1.12935	-0.210263
-1.12535	-0.213866
-1.12135	-0.21622
-1.11735	-0.257018
-1.11335	-0.29909
-1.10935	-0.288419
-1.10535	-0.277406
-1.10135	-0.270118
-1.09735	-0.267266
-1.09335	-0.266234
-1.08936	-0.271204
-1.08536	-0.279721
-1.08136	-0.286206
-1.07736	-0.289887
-1.07336	-0.291755
-1.06936	-0.293759
-1.06536	-0.294077
-1.06136	-0.294337
-1.05736	-0.295724
-1.05336	-0.297076
-1.04936	-0.299788
-1.04537	-0.302058
-1.04137	-0.303696
-1.03737	-0.303193
-1.03337	-0.303442
-1.02937	-0.304988
-1.02537	-0.304399
-1.02137	-0.304997
-1.01737	-0.305194
-1.01337	-0.308431
-1.00937	-0.313829
-1.00537	-0.315693
-1.00137	-0.315873
-0.997376	-0.315365
-0.993377	-0.314985
-0.989378	-0.312384
-0.985379	-0.308097
-0.98138	-0.305264
-0.977381	-0.303504
-0.973382	-0.302025
-0.969383	-0.299093
-0.965384	-0.295807
-0.961385	-0.291986
-0.957386	-0.287815
-0.953386	-0.284176
-0.949387	-0.28103
-0.945388	-0.27834
-0.941389	-0.275587
-0.93739	-0.272846
-0.933391	-0.271102
-0.929392	-0.269579
-0.925393	-0.267155
-0.921394	-0.265885
-0.917395	-0.266073
-0.913396	-0.265355
-0.909397	-0.263782
-0.905398	-0.262339
-0.901399	-0.261715
-0.8974	-0.261093
-0.8934	-0.260894
-0.889401	-0.261945
-0.885402	-0.264155
-0.881403	-0.266212
-0.877404	-0.266906
-0.873405	-0.266522
-0.869406	-0.265802
-0.865407	-0.263346
-0.861408	-0.259018
-0.857409	-0.256462
-0.85341	-0.25513
-0.849411	-0.25384
-0.845412	-0.255632
-0.841413	-0.257971
-0.837414	-0.260247
-0.833414	-0.262512
-0.829415	-0.263579
-0.825416	-0.262345
-0.821417	-0.261256
-0.817418	-0.260038
-0.813419	-0.258212
-0.80942	-0.257698
-0.805421	-0.256121
-0.801422	-0.25523
-0.797423	-0.254774
-0.793424	-0.25234
-0.789425	-0.249048
-0.785426	-0.244582
-0.781427	-0.240343
-0.777428	-0.237373
-0.773428	-0.234581
-0.769429	-0.232049
-0.76543	-0.230236
-0.761431	-0.230201
-0.757432	-0.22892
-0.753433	-0.227506
-0.749434	-0.227445
-0.745435	-0.227619
-0.741436	-0.227651
-0.737437	-0.227345
-0.733438	-0.227104
-0.729439	-0.226669
-0.72544	-0.224093
-0.721441	-0.22072
-0.717442	-0.217945
-0.713443	-0.213872
-0.709443	-0.209364
-0.705444	-0.203036
-0.701445	-0.196448
-0.697446	-0.192644
-0.693447	-0.188324
-0.689448	-0.18439
-0.685449	-0.181735
-0.68145	-0.181365
-0.677451	-0.180635
-0.673452	-0.176313
-0.669453	-0.172778
-0.665454	-0.171072
-0.661455	-0.168897
-0.657456	-0.164967
-0.653457	-0.162595
-0.649457	-0.161532
-0.645458	-0.15832
-0.641459	-0.154421
-0.63746	-0.151603
-0.633461	-0.148697
-0.629462	-0.144883
-0.625463	-0.143066
-0.621464	-0.143795
-0.617465	-0.145105
-0.613466	-0.143165
-0.609467	-0.142519
-0.605468	-0.142188
-0.601469	-0.139203
-0.59747	-0.1346
-0.593471	-0.129855
-0.589471	-0.125999
-0.585472	-0.123651
-0.581473	-0.120086
-0.577474	-0.116868
-0.573475	-0.114273
-0.569476	-0.113395
-0.565477	-0.113185
-0.561478	-0.109067
-0.557479	-0.106039
-0.55348	-0.104992
-0.549481	-0.102327
-0.545482	-0.098215
-0.541483	-0.094319
-0.537484	-0.092604
-0.533485	-0.090039
-0.529485	-0.087349
-0.525486	-0.084313
-0.521487	-0.080818
-0.517488	-0.078051
-0.513489	-0.076186
-0.50949	-0.075619
-0.505491	-0.076492
-0.501492	-0.076709
-0.497493	-0.076634
-0.493494	-0.076267
-0.489495	-0.074203
-0.485496	-0.071033
-0.481497	-0.066624
-0.477498	-0.061832
-0.473499	-0.057547
-0.469499	-0.055198
-0.4655	-0.054106
-0.461501	-0.051908
-0.457502	-0.049457
-0.453503	-0.048113
-0.449504	-0.04788
-0.445505	-0.047556
-0.441506	-0.046573
-0.437507	-0.044245
-0.433508	-0.042092
-0.429509	-0.040851
-0.42551	-0.039099
-0.421511	-0.036478
-0.417512	-0.033753
-0.413513	-0.031254
-0.409513	-0.03045
-0.405514	-0.030474
-0.401515	-0.031039
-0.397516	-0.030362
-0.393517	-0.028034
-0.389518	-0.024628
-0.385519	-0.022787
-0.38152	-0.022996
-0.377521	-0.021295
-0.373522	-0.017693
-0.369523	-0.013813
-0.365524	-0.013279
-0.361525	-0.011119
-0.357526	-0.006672
-0.353527	-0.002151
-0.349527	0.001568
-0.345528	0.002511
-0.341529	0.00449
-0.33753	0.005037
-0.333531	0.006007
-0.329532	0.008412
-0.325533	0.010679
-0.321534	0.013734
-0.317535	0.015742
-0.313536	0.018469
-0.309537	0.0205
-0.305538	0.020525
-0.301539	0.02191
-0.29754	0.022652
-0.293541	0.023824
-0.289541	0.025704
-0.285542	0.027513
-0.281543	0.029854
-0.277544	0.032975
-0.273545	0.035421
-0.269546	0.036463
-0.265547	0.038072
-0.261548	0.039005
-0.257549	0.038791
-0.25355	0.038356
-0.249551	0.038842
-0.245552	0.041247
-0.241553	0.042559
-0.237554	0.043754
-0.233555	0.045472
-0.229555	0.045266
-0.225556	0.044911
-0.221557	0.045079
-0.217558	0.046854
-0.213559	0.049315
-0.20956	0.050114
-0.205561	0.05224
-0.201562	0.053291
-0.197563	0.054531
-0.193564	0.054264
-0.189565	0.055575
-0.185566	0.058294
-0.181567	0.059833
-0.177568	0.059898
-0.173569	0.061353
-0.169569	0.065825
-0.16557	0.068875
-0.161571	0.069042
-0.157572	0.068648
-0.153573	0.070736
-0.149574	0.073406
-0.145575	0.072565
-0.141576	0.071412
-0.137577	0.072647
-0.133578	0.075517
-0.129579	0.075938
-0.12558	0.075994
-0.121581	0.078158
-0.117582	0.081658
-0.113583	0.083186
-0.109583	0.084222
-0.105585	0.086298
-0.101585	0.087873
-0.097586	0.089232
-0.093587	0.090611
-0.089588	0.090375
-0.085589	0.090868
-0.08159	0.09241
-0.077591	0.095152
-0.073592	0.09625
-0.069593	0.097318
-0.065594	0.09997
-0.061595	0.102658
-0.057596	0.104342
-0.053597	0.103971
-0.049598	0.105045
-0.045599	0.108917
-0.041599	0.112025
-0.0376	0.114266
-0.033601	0.115424
-0.029602	0.116898
-0.025603	0.118554
-0.021604	0.117284
-0.017605	0.115807
-0.013606	0.113054
-0.009607	0.111539
-0.005608	0.067564
-0.001609	0.000116
0.00239	-0.000801
0.006389	-0.000478
0.010388	-0.000212
0.014387	-0.000636
0.018387	-0.004612
0.022386	-0.002357
0.026385	0.00125
0.030384	0.00351
0.034383	0.006333
0.038382	0.012769
0.042381	0.018153
0.04638	0.021111
0.050379	0.02107
0.054378	0.022827
0.058377	0.023266
0.062376	0.020767
0.066375	0.020326
0.070374	0.019215
0.074373	0.020895
0.078373	0.021831
0.082372	0.021936
0.086371	0.024792
0.09037	0.023499
0.094369	0.024512
0.098368	0.02537
0.102367	0.02745
0.106366	0.026933
0.110365	0.027126
0.114364	0.028552
0.118363	0.03305
0.122362	0.034499
0.126361	0.036357
0.13036	0.037463
0.134359	0.039615
0.138359	0.039347
0.142358	0.038102
0.146357	0.039566
0.150356	0.039143
0.154355	0.040859
0.158354	0.038897
0.162353	0.036614
0.166352	0.037156
0.170351	0.03396
0.17435	0.031148
0.178349	0.028769
0.182348	0.028998
0.186347	0.033375
0.190346	0.035843
0.194345	0.037913
0.198345	0.040858
0.202344	0.043781
0.206343	0.045128
0.210342	0.045157
0.214341	0.047547
0.21834	0.047871
0.222339	0.049912
0.226338	0.051829
0.230337	0.052123
0.234336	0.054216
0.238335	0.057015
0.242334	0.060464
0.246333	0.061417
0.250332	0.066411
0.254331	0.069848
0.258331	0.07187
0.26233	0.0732
0.266329	0.075167
0.270328	0.081113
0.274327	0.084041
0.278326	0.08895
0.282325	0.095533
0.286324	0.101731
0.290323	0.106164
0.294322	0.109634
0.298321	0.112674
0.30232	0.118316
0.306319	0.119809
0.310318	0.122174
0.314317	0.127326
0.318317	0.12925
0.322316	0.133024
0.326315	0.133
0.330314	0.132259
0.334313	0.134708
0.338312	0.134783
0.342311	0.136699
0.34631	0.136461
0.350309	0.135216
0.354308	0.138726
0.358307	0.139447
0.362306	0.142415
0.366305	0.142701
0.370304	0.140478
0.374303	0.139124
0.378303	0.138962
0.382302	0.14272
0.386301	0.142875
0.3903	0.142114
0.394299	0.145487
0.398298	0.146641
0.402297	0.146468
0.406296	0.146065
0.410295	0.146847
0.414294	0.147695
0.418293	0.144619
0.422292	0.142169
0.426291	0.141648
0.43029	0.143731
0.434289	0.144189
0.438289	0.142995
0.442288	0.144201
0.446287	0.146851
0.450286	0.149092
0.454285	0.146946
0.458284	0.14453
0.462283	0.144914
0.466282	0.146796
0.470281	0.14961
0.47428	0.149153
0.478279	0.1494
0.482278	0.150564
0.486277	0.150491
0.490276	0.148389
0.494275	0.145631
0.498275	0.145064
0.502274	0.144658
0.506273	0.143497
0.510272	0.142227
0.514271	0.144387
0.51827	0.145542
0.522269	0.146119
0.526268	0.145574
0.530267	0.14564
0.534266	0.14675
0.538265	0.147336
0.542264	0.146893
0.546263	0.146122
0.550262	0.146386
0.554261	0.146844
0.558261	0.149069
0.56226	0.148141
0.566259	0.147529
0.570258	0.14775
0.574257	0.150447
0.578256	0.153014
0.582255	0.150464
0.586254	0.150499
0.590253	0.151576
0.594252	0.149313
0.598251	0.146797
0.60225	0.147552
0.606249	0.147934
0.610248	0.151774
0.614247	0.152471
0.618247	0.155916
0.622246	0.158455
0.626245	0.15856
0.630244	0.160173
0.634243	0.160842
0.638242	0.159484
0.642241	0.15911
0.64624	0.158546
0.650239	0.158582
0.654238	0.159072
0.658237	0.159915
0.662236	0.160094
0.666235	0.159169
0.670234	0.159088
0.674233	0.158721
0.678232	0.158197
0.682232	0.158409
0.686231	0.159494
0.69023	0.159667
0.694229	0.160802
0.698228	0.163016
0.702227	0.162076
0.706226	0.159924
0.710225	0.158465
0.714224	0.155648
0.718223	0.152892
0.722222	0.149904
0.726221	0.1492
0.73022	0.151639
0.734219	0.152921
0.738218	0.155674
0.742218	0.158166
0.746217	0.162152
0.750216	0.162771
0.754215	0.162034
0.758214	0.162315
0.762213	0.164326
0.766212	0.163459
0.770211	0.163427
0.77421	0.163167
0.778209	0.163992
0.782208	0.160467
0.786207	0.158442
0.790206	0.157185
0.794205	0.156689
0.798204	0.158364
0.802204	0.157283
0.806203	0.157158
0.810202	0.157964
0.814201	0.159422
0.8182	0.162238
0.822199	0.163218
0.826198	0.165778
0.830197	0.167714
0.834196	0.17001
0.838195	0.169503
0.842194	0.167137
0.846193	0.165583
0.850192	0.164126
0.854191	0.160875
0.858191	0.159094
0.86219	0.159465
0.866189	0.158667
0.870188	0.158247
0.874187	0.158061
0.878186	0.160589
0.882185	0.163848
0.886184	0.164578
0.890183	0.165073
0.894182	0.166779
0.898181	0.165952
0.90218	0.164824
0.906179	0.16301
0.910178	0.164192
0.914177	0.16461
0.918176	0.16607
0.922175	0.166777
0.926175	0.167243
0.930174	0.168319
0.934173	0.168265
0.938172	0.169024
0.942171	0.169122
0.94617	0.169653
0.950169	0.170253
0.954168	0.169342
0.958167	0.169744
0.962166	0.16863
0.966165	0.165824
0.970164	0.164669
0.974163	0.16412
0.978163	0.16533
0.982162	0.164856
0.986161	0.164037
0.99016	0.165637
0.994159	0.166539
0.998158	0.166333
1.00216	0.164565
1.00616	0.163221
1.01015	0.165034
1.01415	0.165261
1.01815	0.165011
1.02215	0.164377
1.02615	0.167117
1.03015	0.171018
1.03415	0.173669
1.03815	0.172802
1.04215	0.171819
1.04615	0.172597
1.05015	0.171006
1.05415	0.166992
1.05814	0.165942
1.06214	0.167102
1.06614	0.167202
1.07014	0.166042
1.07414	0.16696
1.07814	0.168284
1.08214	0.170027
1.08614	0.170166
1.09014	0.170172
1.09414	0.17099
1.09814	0.170806
1.10213	0.170194
1.10613	0.166548
1.11013	0.165269
1.11413	0.164516
1.11813	0.162533
1.12213	0.16308
1.12613	0.162193
1.13013	0.162616
1.13413	0.162331
1.13813	0.161394
1.14212	0.160737
1.14612	0.15905
1.15012	0.161161
1.15412	0.161595
1.15812	0.161494
1.16212	0.161552
1.16612	0.162858
1.17012	0.165552
1.17412	0.165381
1.17812	0.163256
1.18212	0.160951
1.18611	0.162082
1.19011	0.161348
1.19411	0.159866
1.19811	0.16023
1.20211	0.159342
1.20611	0.158742
1.21011	0.157661
1.21411	0.156946
1.21811	0.157098
1.22211	0.15275
1.2261	0.152635
1.2301	0.152572
1.2341	0.149868
1.2381	0.152478
1.2421	0.152387
1.2461	0.153792
1.2501	0.155095
1.2541	0.157247
1.2581	0.160293
1.2621	0.159851
1.26609	0.158159
1.27009	0.158807
1.27409	0.158514
1.27809	0.15663
1.28209	0.15327
1.28609	0.152822
1.29009	0.153487
1.29409	0.153284
1.29809	0.153308
1.30209	0.155193
1.30609	0.157473
1.31008	0.159642
1.31408	0.158723
1.31808	0.158408
1.32208	0.158426
1.32608	0.157426
1.33008	0.155804
1.33408	0.154597
1.33808	0.156874
1.34208	0.156592
1.34608	0.157547
1.35007	0.158903
1.35407	0.161988
1.35807	0.161481
1.36207	0.159722
1.36607	0.15871
1.37007	0.158451
1.37407	0.15734
1.37807	0.153776
1.38207	0.15393
1.38607	0.154187
1.39007	0.155125
1.39407	0.154592
1.39806	0.155739
1.40206	0.156217
1.40606	0.153635
1.41006	0.151398
1.41406	0.150337
1.41806	0.149152
1.42206	0.148382
1.42606	0.147998
1.43006	0.148149
1.43406	0.147589
1.43806	0.147533
1.44205	0.147053
1.44605	0.146666
1.45005	0.145811
1.45405	0.147195
1.45805	0.14915
1.46205	0.149652
1.46605	0.149595
1.47005	0.150328
1.47405	0.149692
1.47805	0.148042
1.48205	0.146219
1.48604	0.143614
1.49004	0.141728
1.49404	0.141
1.49804	0.140549
1.50204	0.140357
1.50604	0.140963
1.51004	0.140731
1.51404	0.140619
1.51804	0.139603
1.52204	0.140248
1.52604	0.140182
1.53003	0.1405
1.53403	0.142399
1.53803	0.143018
1.54203	0.143673
1.54603	0.143033
1.55003	0.143026
1.55403	0.141138
1.55803	0.139643
1.56203	0.139472
1.56603	0.140155
1.57002	0.141988
1.57402	0.141955
1.57802	0.142145
1.58202	0.143176
1.58602	0.144701
1.59002	0.144037
1.59402	0.143316
1.59802	0.142779
1.60202	0.143815
1.60602	0.143982
1.61001	0.143677
1.61401	0.144673
1.61801	0.145321
1.62201	0.144711
1.62601	0.142845
1.63001	0.141259
1.63401	0.141578
1.63801	0.14202
1.64201	0.141578
1.64601	0.141458
1.65001	0.144387
1.654	0.145416
1.658	0.144588
1.662	0.144115
1.666	0.144666
1.67	0.14578
1.674	0.14587
1.678	0.14351
1.682	0.141115
1.686	0.140105
1.69	0.138989
1.69399	0.135651
1.69799	0.135419
1.70199	0.138229
1.70599	0.140858
1.70999	0.143465
1.71399	0.144648
1.71799	0.145665
1.72199	0.14506
1.72599	0.142054
1.72999	0.140145
1.73399	0.13948
1.73798	0.140635
1.74198	0.141867
1.74598	0.142917
1.74998	0.143828
1.75398	0.146468
1.75798	0.147993
1.76198	0.146797
1.76598	0.145908
1.76998	0.144952
1.77398	0.142675
1.77798	0.140163
1.78198	0.137384
1.78597	0.138054
1.78997	0.13708
1.79397	0.136588
1.79797	0.1368
1.80197	0.13635
1.80597	0.136726
1.80997	0.133864
1.81397	0.133184
1.81797	0.132642
1.82197	0.132845
1.82596	0.132825
1.82996	0.134735
1.83396	0.136077
1.83796	0.139185
1.84196	0.141766
1.84596	0.142676
1.84996	0.141937
1.85396	0.138675
1.85796	0.136547
1.86196	0.13296
1.86596	0.131881
1.86995	0.131995
1.87395	0.132843
1.87795	0.133352
1.88195	0.133618
1.88595	0.132124
1.88995	0.129467
1.89395	0.128326
1.89795	0.127235
1.90195	0.126678
1.90595	0.124858
1.90995	0.123879
1.91394	0.126756
1.91794	0.128614
1.92194	0.127273
1.92594	0.126669
1.92994	0.129481
1.93394	0.131731
1.93794	0.130974
1.94194	0.129886
1.94594	0.13107
1.94993	0.129262
1.95393	0.123974
1.95793	0.119798
1.96193	0.119239
1.96593	0.118902
1.96993	0.117577
1.97393	0.1183
1.97793	0.120209
1.98193	0.12341
1.98593	0.124123
1.98993	0.124604
1.99392	0.12545
1.99792	0.124697
2.00192	0.123483
2.00592	0.122814
2.00992	0.120333
2.01392	0.11857
2.01792	0.115987
2.02192	0.116126
2.02592	0.117331
2.02992	0.119714
2.03392	0.120424
2.03791	0.120539
2.04191	0.120573
2.04591	0.120361
2.04991	0.118654
2.05391	0.118097
2.05791	0.117111
2.06191	0.117151
2.06591	0.116629
2.06991	0.116909
2.07391	0.119044
2.07791	0.118187
2.0819	0.119616
2.0859	0.119122
2.0899	0.118043
2.0939	0.117949
2.0979	0.117356
2.1019	0.117786
2.1059	0.115411
2.1099	0.114284
2.1139	0.114271
2.1179	0.112989
2.12189	0.1104
2.12589	0.109709
2.12989	0.111174
2.13389	0.1115
2.13789	0.113345
2.14189	0.114881
2.14589	0.117162
2.14989	0.118718
2.15389	0.120301
2.15789	0.118249
2.16189	0.115287
2.16588	0.112585
2.16988	0.111662
2.17388	0.112411
2.17788	0.112195
2.18188	0.1125
2.18588	0.114812
2.18988	0.115429
2.19388	0.1141
2.19788	0.113485
2.20188	0.1134
2.20588	0.11171
2.20987	0.111036
2.21387	0.110103
2.21787	0.111001
2.22187	0.11152
2.22587	0.112421
2.22987	0.112975
2.23387	0.113522
2.23787	0.115395
2.24187	0.114198
2.24587	0.113865
2.24987	0.113153
2.25386	0.114405
2.25786	0.116239
2.26186	0.116104
2.26586	0.116931
2.26986	0.117498
2.27386	0.116617
2.27786	0.11317
2.28186	0.1106
2.28586	0.110737
2.28986	0.112158
2.29386	0.11003
2.29785	0.10931
2.30185	0.110912
2.30585	0.111565
2.30985	0.109963
2.31385	0.107297
2.31785	0.104504
2.32185	0.104505
2.32585	0.104844
2.32985	0.10424
2.33385	0.102434
2.33785	0.100033
2.34184	0.100661
2.34584	0.101083
2.34984	0.100905
2.35384	0.101658
2.35784	0.103436
2.36184	0.105009
2.36584	0.105317
2.36984	0.105034
2.37384	0.103369
2.37784	0.102619
2.38184	0.102342
2.38583	0.103402
2.38983	0.105485
2.39383	0.105901
2.39783	0.106927
2.40183	0.109903
2.40583	0.110279
2.40983	0.108857
2.41383	0.107267
2.41783	0.105931
2.42183	0.105052
2.42582	0.103776
2.42982	0.104284
2.43382	0.104609
2.43782	0.104072
2.44182	0.104222
2.44582	0.104638
2.44982	0.104024
2.45382	0.10171
2.45782	0.100814
2.46182	0.101078
2.46582	0.102145
2.46981	0.102267
2.47381	0.103541
2.47781	0.104094
2.48181	0.102687
2.48581	0.10223
2.48981	0.100894
2.49381	0.100277
2.49781	0.100398
2.50181	0.099278
2.50581	0.099254
2.50981	0.101139
2.5138	0.102246
2.5178	0.102293
2.5218	0.103525
2.5258	0.104064
2.5298	0.106373
2.5338	0.10668
2.5378	0.107944
2.5418	0.10729
2.5458	0.104199
2.5498	0.103407
2.55379	0.102306
2.55779	0.102176
2.56179	0.102792
2.56579	0.102969
2.56979	0.101809
2.57379	0.102601
2.57779	0.104866
2.58179	0.104781
2.58579	0.102923
2.58979	0.103569
2.59379	0.107593
2.59778	0.109463
2.60178	0.109692
2.60578	0.110653
2.60978	0.112022
2.61378	0.111753
2.61778	0.111279
2.62178	0.110843
2.62578	0.111954
2.62978	0.113761
2.63378	0.112992
2.63777	0.114487
2.64177	0.116365
2.64577	0.117531
2.64977	0.116965
2.65377	0.118095
2.65777	0.120761
2.66177	0.124214
2.66577	0.12571
2.66977	0.125848
2.67377	0.125448
2.67777	0.123468
2.68176	0.120886
2.68576	0.118454
2.68976	0.116626
2.69376	0.115155
2.69776	0.113881
2.70176	0.114334
2.70576	0.113452
2.70976	0.112812
2.71376	0.111223
2.71776	0.111412
2.72175	0.112853
2.72575	0.1153
2.72975	0.117645
2.73375	0.118326
2.73775	0.118728
2.74175	0.119834
2.74575	0.12169
2.74975	0.121464
2.75375	0.121712
2.75775	0.122838
2.76175	0.122498
2.76574	0.12347
2.76974	0.124932
2.77374	0.123101
2.77774	0.121243
2.78174	0.120794
2.78574	0.122152
2.78974	0.122778
2.79374	0.121143
2.79774	0.120813
2.80174	0.121775
2.80574	0.122519
2.80973	0.123421
2.81373	0.124299
2.81773	0.12578
2.82173	0.125961
2.82573	0.126248
2.82973	0.127658
2.83373	0.127065
2.83773	0.127036
2.84173	0.129309
2.84573	0.129983
2.84972	0.128835
2.85372	0.128398
2.85772	0.129177
2.86172	0.128782
2.86572	0.12764
2.86972	0.126455
2.87372	0.126518
2.87772	0.129186
2.88172	0.131604
2.88572	0.130724
2.88972	0.131877
2.89371	0.134468
2.89771	0.135361
2.90171	0.133772
2.90571	0.131994
2.90971	0.132449
2.91371	0.132188
2.91771	0.131895
2.92171	0.130974
2.92571	0.130018
2.92971	0.129904
2.93371	0.130852
2.9377	0.12916
2.9417	0.127867
2.9457	0.127366
2.9497	0.126634
2.9537	0.126333
2.9577	0.124282
2.9617	0.123894
2.9657	0.12464
2.9697	0.126231
2.9737	0.127779
2.9777	0.128737
2.98169	0.129863
2.98569	0.132735
2.98969	0.132265
2.99369	0.132635
2.99769	0.13199
3.00169	0.132121
3.00569	0.131923
3.00969	0.132515
3.01369	0.133832
3.01769	0.133337
3.02169	0.13406
3.02568	0.134941
3.02968	0.134765
3.03368	0.133752
3.03768	0.135436
3.04168	0.136932
3.04568	0.137468
3.04968	0.137438
3.05368	0.138381
3.05768	0.140269
3.06168	0.139244
3.06568	0.139967
3.06967	0.141328
3.07367	0.141671
3.07767	0.140343
3.08167	0.13888
3.08567	0.139195
3.08967	0.137204
3.09367	0.134628
3.09767	0.135338
3.10167	0.138337
3.10567	0.139586
3.10967	0.13914
3.11366	0.13878
3.11766	0.140647
3.12166	0.140259
3.12566	0.136136
3.12966	0.135725
3.13366	0.136278
3.13766	0.13728
3.14166	0.137365
3.14566	0.136492
3.14966	0.137657
3.15365	0.138965
3.15765	0.139581
3.16165	0.141123
3.16565	0.1429
3.16965	0.144977
3.17365	0.146511
3.17765	0.147279
3.18165	0.1483
3.18565	0.147112
3.18965	0.147875
3.19365	0.149328
3.19764	0.150455
3.20164	0.149869
3.20564	0.149164
3.20964	0.149925
3.21364	0.148174
3.21764	0.145615
3.22164	0.14551
3.22564	0.14574
3.22964	0.143766
3.23364	0.140378
3.23764	0.141227
3.24163	0.142795
3.24563	0.144039
3.24963	0.145004
3.25363	0.148301
3.25763	0.153481
3.26163	0.156795
3.26563	0.158488
3.26963	0.159218
3.27363	0.159803
3.27763	0.159742
3.28163	0.157707
3.28562	0.155983
3.28962	0.155917
3.29362	0.156071
3.29762	0.155051
3.30162	0.155799
3.30562	0.157052
3.30962	0.158001
3.31362	0.156607
3.31762	0.155685
3.32161	0.155388
3.32561	0.154349
3.32961	0.155058
3.33361	0.155577
3.33761	0.155823
3.34161	0.157212
3.34561	0.156458
3.34961	0.155419
3.35361	0.155203
3.35761	0.153612
3.36161	0.152034
3.3656	0.152924
3.3696	0.154555
3.3736	0.156876
3.3776	0.157903
3.3816	0.159019
3.3856	0.160259
3.3896	0.158417
3.3936	0.158001
3.3976	0.158402
3.4016	0.159497
3.4056	0.159664
3.40959	0.160001
3.41359	0.162251
3.41759	0.165674
3.42159	0.167551
3.42559	0.169752
3.42959	0.171457
3.43359	0.172483
3.43759	0.170567
3.44159	0.168715
3.44559	0.167301
3.44958	0.164806
3.45358	0.162264
3.45758	0.160184
3.46158	0.160518
3.46558	0.16057
3.46958	0.159835
3.47358	0.158475
3.47758	0.159199
3.48158	0.161647
3.48558	0.162162
3.48958	0.163285
3.49357	0.164456
3.49757	0.165556
3.50157	0.166735
3.50557	0.166182
3.50957	0.166502
3.51357	0.167072
3.51757	0.167129
3.52157	0.166831
3.52557	0.165337
3.52957	0.164433
3.53357	0.166075
3.53756	0.169464
3.54156	0.171735
3.54556	0.173718
3.54956	0.176182
3.55356	0.176854
3.55756	0.177129
3.56156	0.178739
3.56556	0.178722
3.56956	0.180046
3.57356	0.180836
3.57755	0.180569
3.58155	0.17796
3.58555	0.175258
3.58955	0.174366
3.59355	0.173228
3.59755	0.171481
3.60155	0.171332
3.60555	0.172811
3.60955	0.174249
3.61355	0.17459
3.61755	0.174773
3.62154	0.177099
3.62554	0.178703
3.62954	0.179519
3.63354	0.178512
3.63754	0.177381
3.64154	0.177159
3.64554	0.1761
3.64954	0.173381
3.65354	0.172698
3.65754	0.172465
3.66154	0.173643
3.66554	0.175762
3.66953	0.177951
3.67353	0.18098
3.67753	0.183485
3.68153	0.184985
3.68553	0.186556
3.68953	0.186715
3.69353	0.18658
3.69753	0.184491
3.70153	0.180866
3.70553	0.178027
3.70952	0.177881
3.71352	0.178006
3.71752	0.175525
3.72152	0.174918
3.72552	0.175366
3.72952	0.174386
3.73352	0.173036
3.73752	0.172092
3.74152	0.172365
3.74552	0.176165
3.74952	0.179734
3.75352	0.18219
3.75751	0.183257
3.76151	0.184576
3.76551	0.186321
3.76951	0.185976
3.77351	0.183798
3.77751	0.183815
3.78151	0.183897
3.78551	0.182076
3.78951	0.180185
3.79351	0.179689
3.7975	0.179092
3.8015	0.178224
3.8055	0.177319
3.8095	0.177513
3.8135	0.178366
3.8175	0.176907
3.8215	0.177125
3.8255	0.179244
3.8295	0.180061
3.8335	0.17969
3.8375	0.178448
3.84149	0.177985
3.84549	0.177864
3.84949	0.176709
3.85349	0.175514
3.85749	0.176509
3.86149	0.178269
3.86549	0.180231
3.86949	0.182188
3.87349	0.184555
3.87749	0.185862
3.88148	0.185242
3.88548	0.184584
3.88948	0.182735
3.89348	0.180643
3.89748	0.179915
3.90148	0.182372
3.90548	0.184648
3.90948	0.184928
3.91348	0.186378
3.91748	0.188795
3.92148	0.189734
3.92547	0.189099
3.92947	0.188945
3.93347	0.189602
3.93747	0.189656
3.94147	0.189542
3.94547	0.188874
3.94947	0.188241
3.95347	0.187784
3.95747	0.18631
3.96147	0.186311
3.96547	0.186957
3.96946	0.187183
3.97346	0.186712
3.97746	0.188125
3.98146	0.190135
3.98546	0.19121
3.98946	0.190592
3.99346	0.19013
3.99746	0.191148
4.00146	0.189951
4.00546	0.189794
4.00945	0.190421
4.01345	0.189731
4.01745	0.187772
4.02145	0.186554
4.02545	0.186145
4.02945	0.185345
4.03345	0.183801
4.03745	0.182585
4.04145	0.182772
4.04545	0.18326
4.04945	0.184062
4.05344	0.185244
4.05744	0.186481
4.06144	0.18778
4.06544	0.188541
4.06944	0.189504
4.07344	0.190206
4.07744	0.190727
4.08144	0.190997
4.08544	0.191144
4.08944	0.192898
4.09344	0.194197
4.09743	0.194026
4.10143	0.19423
4.10543	0.195527
4.10943	0.196717
4.11343	0.197739
4.11743	0.197693
4.12143	0.197601
4.12543	0.197521
4.12943	0.196576
4.13343	0.194032
4.13742	0.191641
4.14142	0.191275
4.14542	0.192703
4.14942	0.194744
4.15342	0.197953
4.15742	0.19994
4.16142	0.200153
4.16542	0.20036
4.16942	0.199897
4.17342	0.19791
4.17741	0.19576
4.18142	0.195484
4.18541	0.194904
4.18941	0.195546
4.19341	0.196614
4.19741	0.196137
4.20141	0.195747
4.20541	0.19675
4.20941	0.196371
4.21341	0.194488
4.21741	0.192646
4.2214	0.191081
4.2254	0.187722
4.2294	0.183054
4.2334	0.181528
4.2374	0.181018
4.2414	0.181376
4.2454	0.181381
4.2494	0.182272
4.2534	0.185642
4.2574	0.18708
4.2614	0.188096
4.26539	0.189223
4.26939	0.190574
4.27339	0.191737
4.27739	0.191307
4.28139	0.191586
4.28539	0.192016
4.28939	0.192187
4.29339	0.192647
4.29739	0.192143
4.30139	0.19026
4.30539	0.189382
4.30938	0.188459
4.31338	0.187495
4.31738	0.185174
4.32138	0.182829
4.32538	0.184444
4.32938	0.187876
4.33338	0.192334
4.33738	0.195924
4.34138	0.197696
4.34538	0.200102
4.34938	0.202386
4.35337	0.201415
4.35737	0.197996
4.36137	0.194975
4.36537	0.193299
4.36937	0.193451
4.37337	0.193272
4.37737	0.194084
4.38137	0.195248
4.38537	0.196653
4.38937	0.197169
4.39337	0.198208
4.39736	0.199591
4.40136	0.198811
4.40536	0.197951
4.40936	0.197785
4.41336	0.19741
4.41736	0.196289
4.42136	0.195238
4.42536	0.194419
4.42936	0.193242
4.43335	0.193137
4.43736	0.195318
4.44135	0.197438
4.44535	0.197623
4.44935	0.199106
4.45335	0.201155
4.45735	0.201498
4.46135	0.201566
4.46535	0.201017
4.46935	0.200061
4.47335	0.198865
4.47734	0.19768
4.48134	0.198411
4.48534	0.198357
4.48934	0.199922
4.49334	0.201879
4.49734	0.200392
4.50134	0.199903
4.50534	0.199353
4.50934	0.198232
4.51334	0.194063
4.51734	0.190165
4.52133	0.191546
4.52533	0.191207
4.52933	0.189989
4.53333	0.189764
4.53733	0.191025
4.54133	0.193146
4.54533	0.192042
4.54933	0.191029
4.55333	0.190785
4.55733	0.190863
4.56133	0.191146
4.56532	0.18878
4.56932	0.18747
4.57332	0.186209
4.57732	0.185995
4.58132	0.188064
4.58532	0.189017
4.58932	0.190231
4.59332	0.191007
4.59732	0.192368
4.60132	0.192454
4.60532	0.190563
4.60931	0.188514
4.61331	0.186876
4.61731	0.186662
4.62131	0.186269
4.62531	0.185997
4.62931	0.187578
4.63331	0.189122
4.63731	0.191034
4.64131	0.192674
4.64531	0.193629
4.64931	0.193753
4.6533	0.193276
4.6573	0.192608
4.6613	0.193368
4.6653	0.19329
4.6693	0.190637
4.6733	0.18898
4.6773	0.189505
4.6813	0.190854
4.6853	0.191752
4.6893	0.192618
4.69329	0.194605
4.69729	0.197301
4.70129	0.20032
4.70529	0.203099
4.70929	0.204915
4.71329	0.205297
4.71729	0.205521
4.72129	0.204892
4.72529	0.203274
4.72929	0.202039
4.73329	0.201051
4.73728	0.198685
4.74128	0.197008
4.74528	0.198999
4.74928	0.199325
4.75328	0.199849
4.75728	0.202251
4.76128	0.204189
4.76528	0.204955
4.76928	0.202973
4.77328	0.20102
4.77728	0.200693
4.78127	0.200906
4.78527	0.200816
4.78927	0.202139
4.79327	0.204507
4.79727	0.206172
4.80127	0.206594
4.80527	0.204127
4.80927	0.203431
4.81327	0.204428
4.81727	0.204947
4.82127	0.206363
4.82526	0.207712
4.82926	0.208885
4.83326	0.209549
4.83726	0.209556
4.84126	0.208506
4.84526	0.20674
4.84926	0.206148
4.85326	0.207054
4.85726	0.208609
4.86126	0.211524
4.86525	0.211849
4.86925	0.210773
4.87325	0.210449
4.87725	0.209476
4.88125	0.206841
4.88525	0.204483
4.88925	0.203677
4.89325	0.204111
4.89725	0.206203
4.90125	0.206259
4.90525	0.207049
4.90925	0.208699
4.91324	0.207977
4.91724	0.206395
4.92124	0.205539
4.92524	0.207366
4.92924	0.206362
4.93324	0.20439
4.93724	0.205769
4.94124	0.20758
4.94524	0.206755
4.94923	0.20441
4.95323	0.205235
4.95723	0.207495
4.96123	0.208226
4.96523	0.207837
4.96923	0.207887
4.97323	0.209012
4.97723	0.21023
4.98123	0.210536
4.98523	0.210925
4.98923	0.21173
4.99322	0.213715
4.99722	0.213879
5.00122	0.213367
5.00522	0.211094
5.00922	0.209996
5.01322	0.208919
5.01722	0.204576
5.02122	0.202411
5.02522	0.198262
5.02922	0.196403
5.03322	0.195801
5.03721	0.195063
5.04121	0.197486
5.04521	0.19675
5.04921	0.197686
5.05321	0.19871
5.05721	0.20151
5.06121	0.201166
5.06521	0.200431
5.06921	0.20043
5.07321	0.203138
5.07721	0.203466
5.0812	0.203365
5.0852	0.202319
5.0892	0.20199
5.0932	0.202745
5.0972	0.201661
5.1012	0.202614
5.1052	0.206492
5.1092	0.209532
5.1132	0.210352
5.1172	0.212972
5.1212	0.214428
5.12519	0.216018
5.12919	0.21678
5.13319	0.217415
5.13719	0.218527
5.14119	0.220419
5.14519	0.219999
5.14919	0.223424
5.15319	0.223382
5.15719	0.219095
5.16118	0.218441
5.16519	0.217392
5.16918	0.216458
5.17318	0.212367
5.17718	0.214366
5.18118	0.215643
5.18518	0.213703
5.18918	0.214092
5.19318	0.212758
5.19718	0.212731
5.20118	0.211327
5.20517	0.213519
5.20917	0.213346
5.21317	0.213927
5.21717	0.214235
5.22117	0.214961
5.22517	0.215633
5.22917	0.214163
5.23317	0.215103
5.23717	0.216395
5.24117	0.216907
5.24517	0.215844
5.24916	0.214589
5.25316	0.218171
5.25716	0.219579
5.26116	0.220867
5.26516	0.224116
5.26916	0.2257
5.27316	0.228248
5.27716	0.230289
5.28116	0.229031
5.28516	0.22948
5.28916	0.227014
5.29315	0.228247
5.29715	0.23064
5.30115	0.232677
5.30515	0.234691
5.30915	0.234992
5.31315	0.239072
5.31715	0.24217
5.32115	0.243359
5.32515	0.245945
5.32915	0.247716
5.33315	0.251934
5.33714	0.254458
5.34114	0.256541
5.34514	0.258368
5.34914	0.255441
5.35314	0.253465
5.35714	0.253875
5.36114	0.250238
5.36514	0.247623
5.36914	0.248223
5.37314	0.248624
5.37713	0.254198
5.38113	0.254931
5.38513	0.253937
5.38913	0.254841
5.39313	0.255791
5.39713	0.255499
5.40113	0.253407
5.40513	0.252774
5.40913	0.254863
5.41313	0.257512
5.41713	0.258577
5.42112	0.259602
5.42512	0.261228
5.42912	0.261896
5.43312	0.263186
5.43712	0.262752
5.44112	0.264677
5.44512	0.263851
5.44912	0.264464
5.45312	0.262867
5.45712	0.260885
5.46112	0.259821
5.46511	0.258324
5.46911	0.258802
5.47311	0.254786
5.47711	0.252168
5.48111	0.253715
5.48511	0.252987
5.48911	0.25324
5.49311	0.253781
5.49711	0.254235
5.50111	0.256886
5.50511	0.255656
5.5091	0.256151
5.5131	0.256087
5.5171	0.257891
5.5211	0.256646
5.5251	0.256733
5.5291	0.256685
5.5331	0.25728
5.5371	0.254715
5.5411	0.254159
5.54509	0.255441
5.5491	0.253332
5.55309	0.254748
5.55709	0.254718
5.56109	0.253823
5.56509	0.252251
5.56909	0.250363
5.57309	0.250411
5.57709	0.250574
5.58109	0.253361
5.58509	0.251728
5.58909	0.253458
5.59308	0.254744
5.59708	0.257422
5.60108	0.257126
5.60508	0.25773
5.60908	0.257567
5.61308	0.25774
5.61708	0.2562
5.62108	0.255859
5.62508	0.254599
5.62908	0.250892
5.63308	0.249153
5.63707	0.251901
5.64107	0.251421
5.64507	0.253376
5.64907	0.25311
5.65307	0.253789
5.65707	0.254583
5.66107	0.253153
5.66507	0.256199
5.66907	0.254915
5.67307	0.252327
5.67706	0.252609
5.68107	0.250758
5.68506	0.250095
5.68906	0.248548
5.69306	0.246797
5.69706	0.246395
5.70106	0.246546
5.70506	0.246052
5.70906	0.248435
5.71306	0.249125
5.71706	0.249701
5.72105	0.249369
5.72505	0.249513
5.72905	0.252172
5.73305	0.249349
5.73705	0.246912
5.74105	0.245785
5.74505	0.246972
5.74905	0.247776
5.75305	0.246358
5.75705	0.247475
5.76105	0.25092
5.76504	0.249731
5.76904	0.251432
5.77304	0.248484
5.77704	0.243753
5.78104	0.242487
5.78504	0.241786
5.78904	0.242237
5.79304	0.243234
5.79704	0.245027
5.80104	0.248489
5.80504	0.249029
5.80903	0.248031
5.81303	0.247535
5.81703	0.247095
5.82103	0.246325
5.82503	0.245826
5.82903	0.244871
5.83303	0.24507
5.83703	0.243699
5.84103	0.241435
5.84503	0.242726
5.84903	0.241242
5.85302	0.240159
5.85702	0.241262
5.86102	0.242468
5.86502	0.245187
5.86902	0.24721
5.87302	0.246539
5.87702	0.24806
5.88102	0.250426
5.88502	0.24933
5.88901	0.246433
5.89302	0.246328
5.89701	0.248211
5.90101	0.249458
5.90501	0.244931
5.90901	0.242455
5.91301	0.245467
5.91701	0.244044
5.92101	0.243025
5.92501	0.242091
5.92901	0.245773
5.933	0.245572
5.937	0.246039
5.941	0.248523
5.945	0.248519
5.949	0.246678
5.953	0.243033
5.957	0.24439
5.961	0.243078
5.965	0.243199
5.969	0.244342
5.973	0.243958
5.97699	0.242421
5.98099	0.241305
5.98499	0.241901
5.98899	0.240804
5.99299	0.238276
5.99699	0.238897
6.00099	0.242836
6.00499	0.244172
6.00899	0.242495
6.01299	0.243789
6.01699	0.246899
6.02098	0.247152
6.02498	0.247194
6.02898	0.246917
6.03298	0.246308
6.03698	0.247531
6.04098	0.247901
6.04498	0.248003
6.04898	0.247214
6.05298	0.246837
6.05698	0.249872
6.06098	0.249748
6.06497	0.250673
6.06897	0.24924
6.07297	0.246145
6.07697	0.248323
6.08097	0.246974
6.08497	0.243863
6.08897	0.243084
6.09297	0.24201
6.09697	0.242043
6.10097	0.239218
6.10496	0.238395
6.10896	0.238046
6.11296	0.234744
6.11696	0.236293
6.12096	0.237899
6.12496	0.23925
6.12896	0.240737
6.13296	0.242313
6.13696	0.243907
6.14096	0.241927
6.14496	0.238526
6.14895	0.240033
6.15295	0.238202
6.15695	0.23815
6.16095	0.238667
6.16495	0.240765
6.16895	0.242935
6.17295	0.241936
6.17695	0.243594
6.18095	0.24708
6.18495	0.248686
6.18895	0.249547
6.19294	0.252658
6.19694	0.252515
6.20094	0.253994
6.20494	0.25198
6.20894	0.250537
6.21294	0.252361
6.21694	0.250079
6.22094	0.249498
6.22494	0.250789
6.22894	0.249281
6.23294	0.247555
6.23693	0.244291
6.24093	0.243402
6.24493	0.24401
6.24893	0.244577
6.25293	0.245838
6.25693	0.2462
6.26093	0.24632
6.26493	0.248891
6.26893	0.249175
6.27293	0.248959
6.27693	0.248362
6.28092	0.249449
6.28492	0.250938
6.28892	0.249633
6.29292	0.248612
6.29692	0.247422
6.30092	0.24793
6.30492	0.24528
6.30892	0.242896
6.31292	0.246137
6.31692	0.245862
6.32091	0.241852
6.32491	0.241533
6.32891	0.243081
6.33291	0.2434
6.33691	0.241119
6.34091	0.239823
6.34491	0.242104
6.34891	0.241261
6.35291	0.241473
6.35691	0.240192
6.36091	0.238598
6.3649	0.238263
6.3689	0.239717
6.3729	0.237553
6.3769	0.235048
6.3809	0.233567
6.3849	0.234508
6.3889	0.23738
6.3929	0.237836
6.3969	0.243284
6.4009	0.244982
6.40489	0.246999
6.4089	0.248787
6.41289	0.246627
6.41689	0.248799
6.42089	0.245603
6.42489	0.249221
6.42889	0.248753
6.43289	0.245947
6.43689	0.243601
6.44089	0.243285
6.44489	0.243531
6.44888	0.242764
6.45288	0.240501
6.45688	0.243308
6.46088	0.246105
6.46488	0.248039
6.46888	0.248106
6.47288	0.248592
6.47688	0.250034
6.48088	0.248702
6.48488	0.247678
6.48888	0.247588
6.49287	0.24695
6.49687	0.245633
6.50087	0.245247
6.50487	0.245735
6.50887	0.24505
6.51287	0.243811
6.51687	0.243192
6.52087	0.243203
6.52487	0.241192
6.52887	0.240865
6.53287	0.240313
6.53686	0.238923
6.54086	0.239789
6.54486	0.241329
6.54886	0.242026
6.55286	0.242728
6.55686	0.242481
6.56086	0.243363
6.56486	0.240633
6.56886	0.239153
6.57286	0.238
6.57686	0.23783
6.58085	0.238921
6.58485	0.238178
6.58885	0.239204
6.59285	0.241337
6.59685	0.240188
6.60085	0.238103
6.60485	0.236103
6.60885	0.2342
6.61285	0.234227
6.61685	0.231347
6.62085	0.231327
6.62484	0.230931
6.62884	0.232287
6.63284	0.233169
6.63684	0.233175
6.64084	0.233597
6.64484	0.237914
6.64884	0.236495
6.65284	0.234803
6.65684	0.233076
6.66083	0.234355
6.66483	0.236641
6.66883	0.234544
6.67283	0.233793
6.67683	0.235788
6.68083	0.238785
6.68483	0.241124
6.68883	0.239758
6.69283	0.239696
6.69683	0.240909
6.70083	0.241737
6.70482	0.242473
6.70882	0.240176
6.71282	0.240432
6.71682	0.240518
6.72082	0.241307
6.72482	0.241339
6.72882	0.240013
6.73282	0.241138
6.73682	0.240897
6.74082	0.240764
6.74482	0.238117
6.74881	0.23875
6.75281	0.236283
6.75681	0.232724
6.76081	0.232177
[truncated: 28,982 more rows]
