# Supplementary material for: NirD curtails the stringent response by inhibiting RelA activity in Escherichia coli
Source: eLife. 2021 Jul 29;10:e64092. doi: 10.7554/eLife.64092 (PMC8321558; doi:10.7554/eLife.64092)
Supplement: Figure 5—figure supplement 1—source data 7. [file elife-64092-fig5-figsupp1-data7.xlsx]

## Sheet: Fig 5–fig sup 1–source data 7
Figure 5–figure supplement 1–source data 7. Raw data for SEC experiment separating RelAN-terminal and NirD alone or pre-mixed
RelA			RelA-NirD			NirD						Uncropped Figure 5–figure supplements 1D and 1E
Elution volume (mL)	A280 (mAU)		Elution volume (mL)	A280 (mAU)		Elution volume (mL)	A280 (mAU)		Elution volume (mL)	Fractions
0.000115	5.86677		0.000457	0.041196		0.000149	5.83728		6.78273	2
0.001105	5.83474		0.001444	0.040631		0.001146	5.8099		7.03281	3
0.002095	5.81962		0.00243	0.040666		0.002143	5.79439		7.28279	4
0.003085	5.80802		0.003416	0.040011		0.003141	5.78308		7.53235	5
0.004075	5.79867		0.004403	0.038826		0.004138	5.77324		7.78332	6
0.005065	5.78959		0.005389	0.039021		0.005135	5.76616		8.03303	7
0.006055	5.78167		0.006376	0.038707		0.006133	5.75905		8.28316	8
0.007045	5.77481		0.007362	0.038753		0.00713	5.75236		8.53345	9
0.008035	5.76812		0.008348	0.039195		0.008127	5.74685		8.7837	10
0.009025	5.76163		0.009335	0.039323		0.009125	5.74161		9.03401	11
0.010015	5.75534		0.010321	0.03959		0.010122	5.73621		9.28349	12
0.011005	5.74856		0.011308	0.039652		0.011119	5.73124		9.53402	13
0.011995	5.74247		0.012294	0.040259		0.012117	5.72608		9.78446	14
0.012985	5.73731		0.013281	0.040381		0.013114	5.72083		10.034	15
0.013975	5.73254		0.014267	0.040348		0.014112	5.71603		10.2848	16
0.014965	5.72786		0.015253	0.040936		0.015109	5.71103		10.5345	17
0.015954	5.72292		0.01624	0.0416		0.016106	5.7063		10.7845	18
0.016944	5.7178		0.017226	0.041351		0.017104	5.70248		11.0349	19
0.017934	5.71261		0.018212	0.041118		0.018101	5.69844		11.2851	20
0.018924	5.70757		0.019199	0.041137		0.019098	5.69384		11.5349	21
0.019914	5.70314		0.020185	0.041676		0.020096	5.68954		11.7855	22
0.020904	5.69877		0.021172	0.042797		0.021093	5.68579		12.0354	23
0.021894	5.69432		0.022158	0.043929		0.02209	5.68199		12.2856	24
0.022884	5.6901		0.023144	0.044527		0.023088	5.6783		12.536	25
0.023874	5.68607		0.024131	0.045244		0.024085	5.67469		12.786	26
0.024864	5.68174		0.025117	0.045325		0.025082	5.6718		13.0363	27
0.025854	5.6774		0.026104	0.044803		0.02608	5.66915		13.2859	28
0.026844	5.67399		0.02709	0.045213		0.027077	5.66637		13.537	29
0.027834	5.66969		0.028077	0.045533		0.028075	5.66306		13.787	30
0.028824	5.66502		0.029063	0.045586		0.029072	5.65952		14.0368	31
0.029814	5.66104		0.030049	0.046193		0.030069	5.65722		14.2869	32
0.030804	5.65791		0.031036	0.046389		0.031067	5.65496		14.537	33
0.031794	5.65481		0.032022	0.046472		0.032064	5.65156		14.787	34
0.032784	5.6507		0.033008	0.046855		0.033061	5.64854		15.0379	35
0.033774	5.64762		0.033995	0.046833		0.034059	5.64582		15.2879	36
0.034764	5.64473		0.034981	0.047099		0.035056	5.64292		15.538	37
0.035754	5.64174		0.035968	0.047626		0.036053	5.63964		15.7878	38
0.036744	5.63817		0.036954	0.048419		0.037051	5.63651		16.0379	39
0.037734	5.63514		0.037941	0.049389		0.038048	5.63393		16.2879	40
0.038724	5.63229		0.038927	0.049574		0.039045	5.63096		16.5388	41
0.039714	5.62952		0.039913	0.050221		0.040043	5.62815		16.7888	42
0.040704	5.62645		0.0409	0.050824		0.04104	5.62494		17.0389	43
0.041693	5.62335		0.041886	0.051609		0.042037	5.62186		17.2887	44
0.042683	5.62195		0.042873	0.052766		0.043035	5.61902		17.5388	45
0.043673	5.61875		0.043859	0.053255		0.044032	5.61614		17.7888	46
0.044663	5.61621		0.044845	0.053039		0.04503	5.61348		18.0389	47
0.045653	5.61425		0.045832	0.053027		0.046027	5.61127		18.2897	48
0.046643	5.61186		0.046818	0.053169		0.047024	5.6089		18.5398	49
0.047633	5.60905		0.047805	0.053576		0.048022	5.60557		18.7898	50
0.048623	5.60616		0.048791	0.054372		0.049019	5.60194		19.0397	51
0.049613	5.60262		0.049777	0.055139		0.050016	5.59869		19.2897	52
0.050603	5.59929		0.050764	0.055712		0.051014	5.59621		19.5404	53
0.051593	5.59572		0.05175	0.055788		0.052011	5.59294		19.7907	54
0.052583	5.59128		0.052737	0.056904		0.053008	5.58935		20.0406	55
0.053573	5.58738		0.053723	0.057578		0.054006	5.58651		20.2909	56
0.054563	5.58388		0.054709	0.057433		0.055003	5.58324		20.5406	57
0.055553	5.58124		0.055696	0.057389		0.056	5.57958		20.7908	58
0.056543	5.57723		0.056682	0.057611		0.056998	5.57646		21.0406	59
0.057533	5.57313		0.057669	0.057191		0.057995	5.57322		21.291	60
0.058523	5.56878		0.058655	0.057602		0.058993	5.56903		21.5411	61
0.059513	5.56497		0.059641	0.057468		0.05999	5.56501		21.7915	62
0.060503	5.56137		0.060628	0.057576		0.060987	5.56125		22.0417	63
0.061493	5.55774		0.061614	0.057755		0.061985	5.55697		22.2918	64
0.062483	5.55398		0.062601	0.057421		0.062982	5.55252		22.5424	65
0.063473	5.5492		0.063587	0.058665		0.063979	5.54801		22.7917	66
0.064463	5.54459		0.064573	0.057757		0.064977	5.54352		23.042	67
0.065452	5.53954		0.06556	0.056727		0.065974	5.53928		23.292	68
0.066442	5.53522		0.066546	0.056336		0.066971	5.53429		23.5428	69
0.067432	5.53109		0.067533	0.056293		0.067969	5.52883		23.7925	70
0.068422	5.52604		0.068519	0.056346		0.068966	5.5242		24.0431	71
0.069412	5.52071		0.069505	0.056678		0.069963	5.5193		24.2926	72
0.070402	5.5154		0.070492	0.055016		0.070961	5.51455
0.071392	5.50999		0.071478	0.053805		0.071958	5.51052
0.072382	5.50454		0.072465	0.053611		0.072955	5.50649
0.073372	5.49875		0.073451	0.05403		0.073953	5.50223
0.074362	5.49313		0.074437	0.053612		0.07495	5.49671
0.075352	5.48703		0.075424	0.05311		0.075948	5.49154
0.076342	5.4808		0.07641	0.052824		0.076945	5.48651
0.077332	5.47473		0.077397	0.05249		0.077942	5.48179
0.078322	5.46952		0.078383	0.053162		0.07894	5.47656
0.079312	5.46425		0.079369	0.053633		0.079937	5.47024
0.080302	5.45871		0.080356	0.054056		0.080934	5.46454
0.081292	5.4521		0.081342	0.054319		0.081932	5.45938
0.082282	5.44632		0.082329	0.054024		0.082929	5.45468
0.083272	5.4401		0.083315	0.053021		0.083926	5.44883
0.084262	5.43328		0.084301	0.052175		0.084924	5.44317
0.085252	5.4266		0.085288	0.052071		0.085921	5.43742
0.086242	5.42		0.086274	0.052309		0.086918	5.43169
0.087232	5.41407		0.087261	0.052243		0.087916	5.4255
0.088222	5.40837		0.088247	0.052392		0.088913	5.42022
0.089212	5.40314		0.089233	0.052155		0.08991	5.41484
0.090201	5.39715		0.09022	0.051508		0.090908	5.40972
0.091192	5.39087		0.091206	0.050892		0.091905	5.40444
0.092181	5.38378		0.092193	0.050019		0.092903	5.39808
0.093171	5.37672		0.093179	0.048191		0.0939	5.39212
0.094161	5.37033		0.094165	0.048004		0.094897	5.38618
0.095151	5.36321		0.095152	0.04843		0.095895	5.37977
0.096141	5.35657		0.096138	0.04813		0.096892	5.37379
0.097131	5.34945		0.097125	0.047103		0.097889	5.36851
0.098121	5.34259		0.098111	0.046698		0.098887	5.36268
0.099111	5.33601		0.099097	0.047136		0.099884	5.35671
0.100101	5.3292		0.100084	0.046783		0.100881	5.35045
0.101091	5.32253		0.10107	0.04705		0.101879	5.34454
0.102081	5.31616		0.102057	0.046951		0.102876	5.33855
0.103071	5.30979		0.103043	0.046337		0.103873	5.33197
0.104061	5.30337		0.104029	0.046119		0.104871	5.32514
0.105051	5.29568		0.105016	0.046191		0.105868	5.31902
0.106041	5.28814		0.106002	0.046267		0.106865	5.31255
0.107031	5.28101		0.106989	0.046145		0.107863	5.3059
0.108021	5.27432		0.107975	0.045993		0.10886	5.29905
0.109011	5.26765		0.108961	0.045623		0.109857	5.29257
0.110001	5.26054		0.109948	0.04493		0.110855	5.28594
0.110991	5.25311		0.110934	0.044642		0.111852	5.27985
0.111981	5.24536		0.111921	0.044123		0.11285	5.27346
0.112971	5.23821		0.112907	0.04308		0.113847	5.26721
0.113961	5.23051		0.113894	0.042897		0.114844	5.2613
0.114951	5.22285		0.11488	0.043587		0.115842	5.25516
0.11594	5.21575		0.115866	0.04371		0.116839	5.24869
0.11693	5.20852		0.116853	0.043875		0.117836	5.2427
0.11792	5.20174		0.117839	0.044864		0.118834	5.23708
0.11891	5.19549		0.118825	0.045486		0.119831	5.23144
0.1199	5.1896		0.119812	0.045473		0.120828	5.22503
0.12089	5.18386		0.120798	0.047381		0.121826	5.21846
0.12188	5.17747		0.121785	0.047633		0.122823	5.2118
0.12287	5.1707		0.122771	0.04739		0.12382	5.20552
0.12386	5.16417		0.123757	0.047161		0.124818	5.20034
0.12485	5.15786		0.124744	0.047964		0.125815	5.19503
0.12584	5.15154		0.12573	0.049564		0.126812	5.18937
0.12683	5.14497		0.126717	0.050443		0.12781	5.1831
0.12782	5.13931		0.127703	0.050824		0.128807	5.17722
0.12881	5.13283		0.12869	0.051623		0.129805	5.17235
0.1298	5.12694		0.129676	0.052051		0.130802	5.16638
0.13079	5.12133		0.130662	0.052003		0.131799	5.16109
0.13178	5.11601		0.131649	0.052689		0.132797	5.1556
0.13277	5.11046		0.132635	0.052696		0.133794	5.15058
0.13376	5.10483		0.133622	0.053757		0.134791	5.14605
0.13475	5.10057		0.134608	0.055666		0.135789	5.14237
0.13574	5.09509		0.135594	0.057638		0.136786	5.13847
0.13673	5.09071		0.136581	0.059254		0.137783	5.13467
0.13772	5.08644		0.137567	0.060654		0.138781	5.13016
0.13871	5.08189		0.138554	0.063294		0.139778	5.12698
0.1397	5.07799		0.13954	0.066246		0.140775	5.1233
0.140689	5.07521		0.140526	0.069813		0.141773	5.11998
0.141679	5.07241		0.141513	0.072349		0.14277	5.11646
0.142669	5.06976		0.142499	0.076299		0.143767	5.11404
0.143659	5.0677		0.143486	0.080728		0.144765	5.11236
0.144649	5.06563		0.144472	0.085137		0.145762	5.11096
0.145639	5.0645		0.145458	0.090009		0.14676	5.10991
0.146629	5.06251		0.146445	0.095984		0.147757	5.10957
0.147619	5.06183		0.147431	0.10273		0.148754	5.10852
0.148609	5.06132		0.148418	0.109394		0.149752	5.10858
0.149599	5.06094		0.149404	0.114902		0.150749	5.10836
0.150589	5.06063		0.15039	0.121531		0.151746	5.10843
0.151579	5.06099		0.151377	0.127383		0.152744	5.10866
0.152569	5.06165		0.152363	0.134308		0.153741	5.10931
0.153559	5.06228		0.15335	0.14268		0.154738	5.11037
0.154549	5.06351		0.154336	0.151366		0.155736	5.111
0.155539	5.06635		0.155322	0.159647		0.156733	5.11293
0.156529	5.06826		0.156309	0.167801		0.15773	5.11444
0.157519	5.07068		0.157295	0.176153		0.158728	5.11673
0.158509	5.07216		0.158282	0.184652		0.159725	5.11812
0.159499	5.0743		0.159268	0.194748		0.160722	5.12019
0.160489	5.0766		0.160254	0.203566		0.16172	5.12095
0.161479	5.07868		0.161241	0.212867		0.162717	5.12245
0.162469	5.08115		0.162227	0.223357		0.163715	5.12349
0.163459	5.08298		0.163214	0.234135		0.164712	5.12483
0.164448	5.08715		0.1642	0.244092		0.165709	5.12561
0.165439	5.08954		0.165186	0.254347		0.166707	5.12759
0.166428	5.09273		0.166173	0.264633		0.167704	5.12949
0.167418	5.09528		0.167159	0.273444		0.168701	5.13089
0.168408	5.09764		0.168146	0.282177		0.169699	5.1319
0.169398	5.09931		0.169132	0.291542		0.170696	5.1339
0.170388	5.1013		0.170118	0.30089		0.171693	5.13488
0.171378	5.10261		0.171105	0.309989		0.172691	5.13609
0.172368	5.10457		0.172091	0.319266		0.173688	5.1372
0.173358	5.10628		0.173078	0.328963		0.174685	5.13847
0.174348	5.10832		0.174064	0.338212		0.175683	5.13928
0.175338	5.11075		0.17505	0.346306		0.17668	5.14001
0.176328	5.11293		0.176037	0.354674		0.177678	5.14082
0.177318	5.11452		0.177023	0.363492		0.178675	5.14186
0.178308	5.11553		0.17801	0.371805		0.179672	5.14182
0.179298	5.11685		0.178996	0.379831		0.18067	5.14165
0.180288	5.1176		0.179982	0.387857		0.181667	5.14179
0.181278	5.11812		0.180969	0.395985		0.182664	5.14093
0.182268	5.11825		0.181955	0.404046		0.183662	5.13963
0.183258	5.11876		0.182942	0.412086		0.184659	5.13882
0.184248	5.1189		0.183928	0.419774		0.185656	5.13636
0.185238	5.11909		0.184914	0.426514		0.186654	5.13495
0.186228	5.11891		0.185901	0.432627		0.187651	5.13362
0.187218	5.1179		0.186887	0.438671		0.188648	5.13292
0.188208	5.11678		0.187874	0.444575		0.189646	5.1301
0.189198	5.11472		0.18886	0.450316		0.190643	5.12792
0.190188	5.11174		0.189846	0.455123		0.19164	5.12545
0.191177	5.10912		0.190833	0.460066		0.192638	5.12319
0.192167	5.10632		0.191819	0.464867		0.193635	5.11921
0.193157	5.10296		0.192806	0.468491		0.194633	5.11435
0.194147	5.09865		0.193792	0.471327		0.19563	5.10836
0.195137	5.09318		0.194778	0.473392		0.196627	5.10352
0.196127	5.08788		0.195765	0.474665		0.197625	5.09723
0.197117	5.08312		0.196751	0.474946		0.198622	5.09298
0.198107	5.07741		0.197738	0.475117		0.199619	5.08736
0.199097	5.07156		0.198724	0.475029		0.200617	5.08118
0.200087	5.06515		0.19971	0.475339		0.201614	5.0752
0.201077	5.05804		0.200697	0.475244		0.202611	5.06921
0.202067	5.05025		0.201683	0.474681		0.203609	5.0625
0.203057	5.04218		0.20267	0.473617		0.204606	5.05487
0.204047	5.03391		0.203656	0.472422		0.205603	5.04832
0.205037	5.02566		0.204643	0.470573		0.206601	5.04002
0.206027	5.0169		0.205629	0.468922		0.207598	5.03131
0.207017	5.00791		0.206615	0.466557		0.208596	5.02408
0.208007	4.99929		0.207602	0.464691		0.209593	5.0166
0.208997	4.99037		0.208588	0.462098		0.21059	5.0088
0.209987	4.98067		0.209574	0.457651		0.211588	5.00071
0.210977	4.97113		0.210561	0.454401		0.212585	4.99289
0.211967	4.9622		0.211547	0.450048		0.213582	4.98482
0.212957	4.95326		0.212534	0.445507		0.21458	4.97645
0.213947	4.94348		0.21352	0.440517		0.215577	4.96777
0.214936	4.93358		0.214507	0.435334		0.216574	4.95926
0.215927	4.92364		0.215493	0.430526		0.217572	4.95082
0.216916	4.91301		0.216479	0.425759		0.218569	4.94205
0.217906	4.90262		0.217466	0.42132		0.219566	4.93343
0.218896	4.89345		0.218452	0.416354		0.220564	4.92489
0.219886	4.88428		0.219439	0.412916		0.221561	4.91673
0.220876	4.87507		0.220425	0.408357		0.222558	4.90883
0.221866	4.86616		0.221411	0.404383		0.223556	4.90089
0.222856	4.85643		0.222398	0.400076		0.224553	4.89262
0.223846	4.84613		0.223384	0.39517		0.22555	4.88399
0.224836	4.83572		0.22437	0.390265		0.226548	4.87526
0.225826	4.82616		0.225357	0.386552		0.227545	4.86692
0.226816	4.81746		0.226343	0.382473		0.228543	4.85795
0.227806	4.80845		0.22733	0.377711		0.22954	4.85002
0.228796	4.79946		0.228316	0.373561		0.230537	4.84218
0.229786	4.78956		0.229303	0.369495		0.231535	4.83434
0.230776	4.77977		0.230289	0.366055		0.232532	4.82762
0.231766	4.77029		0.231275	0.361648		0.233529	4.82034
0.232756	4.76117		0.232262	0.357956		0.234527	4.81273
0.233746	4.75315		0.233248	0.353994		0.235524	4.80558
0.234736	4.7443		0.234235	0.349401		0.236521	4.7981
0.235726	4.73604		0.235221	0.345369		0.237519	4.7905
0.236716	4.72692		0.236207	0.342031		0.238516	4.78245
0.237706	4.71771		0.237194	0.338739		0.239513	4.7747
0.238696	4.70875		0.23818	0.334477		0.240511	4.76683
0.239686	4.69974		0.239166	0.330828		0.241508	4.75864
0.240675	4.69146		0.240153	0.326983		0.242505	4.75192
0.241665	4.68276		0.241139	0.322989		0.243503	4.7449
0.242655	4.67481		0.242126	0.3195		0.2445	4.73848
0.243645	4.66629		0.243112	0.316418		0.245498	4.73231
0.244635	4.65803		0.244099	0.312953		0.246495	4.72507
0.245625	4.65042		0.245085	0.309919		0.247492	4.71751
0.246615	4.64227		0.246071	0.307578		0.24849	4.70961
0.247605	4.63381		0.247058	0.304981		0.249487	4.70205
0.248595	4.62602		0.248044	0.302087		0.250484	4.69488
0.249585	4.61795		0.249031	0.298885		0.251482	4.68766
0.250575	4.61092		0.250017	0.296144		0.252479	4.68052
0.251565	4.60344		0.251003	0.293883		0.253476	4.67384
0.252555	4.59577		0.25199	0.291452		0.254474	4.66733
0.253545	4.58871		0.252976	0.288458		0.255471	4.6606
0.254535	4.58185		0.253963	0.285073		0.256468	4.6541
0.255525	4.57404		0.254949	0.281588		0.257466	4.64813
0.256515	4.56726		0.255935	0.278322		0.258463	4.64108
0.257505	4.55959		0.256922	0.27547		0.25946	4.63403
0.258495	4.55201		0.257908	0.272218		0.260458	4.6272
0.259485	4.54533		0.258895	0.269886		0.261455	4.62113
0.260475	4.53876		0.259881	0.26794		0.262452	4.61462
0.261465	4.53232		0.260867	0.265283		0.26345	4.60858
0.262455	4.52491		0.261854	0.262796		0.264447	4.60146
0.263445	4.51761		0.26284	0.260847		0.265445	4.59614
0.264435	4.51102		0.263827	0.259252		0.266442	4.58973
0.265424	4.50335		0.264813	0.257136		0.267439	4.58332
0.266415	4.49764		0.265799	0.254351		0.268437	4.57709
0.267404	4.49114		0.266786	0.251806		0.269434	4.57094
0.268394	4.48474		0.267772	0.249648		0.270431	4.5642
0.269384	4.47733		0.268759	0.247421		0.271429	4.55839
0.270374	4.4697		0.269745	0.245605		0.272426	4.552
0.271364	4.46141		0.270731	0.243676		0.273423	4.5462
0.272354	4.45459		0.271718	0.2417		0.274421	4.53976
0.273344	4.44821		0.272704	0.239775		0.275418	4.53423
0.274334	4.44203		0.273691	0.238548		0.276415	4.52896
0.275324	4.43528		0.274677	0.237255		0.277413	4.52361
0.276314	4.42831		0.275663	0.235068		0.27841	4.51701
0.277304	4.42144		0.27665	0.232893		0.279408	4.5104
0.278294	4.41526		0.277636	0.231106		0.280405	4.505
0.279284	4.41006		0.278623	0.229117		0.281402	4.49923
0.280274	4.40439		0.279609	0.22718		0.2824	4.49296
0.281264	4.39894		0.280595	0.224632		0.283397	4.48787
0.282254	4.39344		0.281582	0.222257		0.284394	4.48302
0.283244	4.38618		0.282568	0.219664		0.285392	4.47866
0.284234	4.3786		0.283555	0.217887		0.286389	4.47387
0.285224	4.37093		0.284541	0.216697		0.287386	4.46829
0.286214	4.36509		0.285527	0.214583		0.288384	4.46265
0.287204	4.35935		0.286514	0.212442		0.289381	4.45642
0.288194	4.35339		0.2875	0.210917		0.290378	4.45065
0.289184	4.3478		0.288487	0.2095		0.291376	4.4451
0.290174	4.34246		0.289473	0.207801		0.292373	4.4391
0.291163	4.33692		0.29046	0.206254		0.29337	4.43412
0.292153	4.33062		0.291446	0.205039		0.294368	4.42804
0.293143	4.32409		0.292432	0.203481		0.295365	4.42225
0.294133	4.31844		0.293419	0.202712		0.296363	4.41704
0.295123	4.31302		0.294405	0.201437		0.29736	4.41197
0.296113	4.3078		0.295391	0.198832		0.298357	4.40646
0.297103	4.30242		0.296378	0.197362		0.299355	4.40082
0.298093	4.29669		0.297364	0.196064		0.300352	4.39612
0.299083	4.29087		0.298351	0.194731		0.301349	4.39146
0.300073	4.28516		0.299337	0.193584		0.302347	4.38653
0.301063	4.27895		0.300323	0.191969		0.303344	4.38103
0.302053	4.27345		0.30131	0.190836		0.304341	4.37534
0.303043	4.2682		0.302296	0.18942		0.305339	4.36997
0.304033	4.262		0.303283	0.187939		0.306336	4.36471
0.305023	4.25561		0.304269	0.186908		0.307333	4.35966
0.306013	4.24972		0.305256	0.185382		0.308331	4.35424
0.307003	4.24413		0.306242	0.183838		0.309328	4.34874
0.307993	4.23875		0.307228	0.182779		0.310326	4.34332
0.308983	4.23368		0.308215	0.182271		0.311323	4.33792
0.309973	4.22866		0.309201	0.180275		0.31232	4.33321
0.310963	4.22308		0.310187	0.178514		0.313318	4.32867
0.311953	4.21714		0.311174	0.176855		0.314315	4.32391
0.312943	4.21137		0.31216	0.175488		0.315312	4.31857
0.313933	4.20584		0.313147	0.173595		0.31631	4.31451
0.314923	4.20026		0.314133	0.172415		0.317307	4.3105
0.315912	4.19429		0.31512	0.171259		0.318304	4.30662
0.316902	4.18855		0.316106	0.169731		0.319302	4.30203
0.317892	4.1833		0.317092	0.167811		0.320299	4.29774
0.318882	4.17824		0.318079	0.165633		0.321296	4.29282
0.319872	4.1732		0.319065	0.163996		0.322294	4.28827
0.320862	4.16873		0.320052	0.162743		0.323291	4.28232
0.321852	4.16396		0.321038	0.161667		0.324288	4.27725
0.322842	4.15825		0.322024	0.160439		0.325286	4.27258
0.323832	4.15301		0.323011	0.158756		0.326283	4.26798
0.324822	4.14827		0.323997	0.156948		0.327281	4.26297
0.325812	4.14407		0.324984	0.155388		0.328278	4.2593
0.326802	4.13919		0.32597	0.155022		0.329275	4.25535
0.327792	4.13406		0.326956	0.154451		0.330273	4.25106
0.328782	4.12863		0.327943	0.153347		0.33127	4.24678
0.329772	4.12334		0.328929	0.151415		0.332267	4.24326
0.330762	4.11856		0.329916	0.150419		0.333265	4.23896
0.331752	4.11345		0.330902	0.15036		0.334262	4.23394
0.332742	4.10904		0.331888	0.149424		0.335259	4.22895
0.333732	4.10525		0.332875	0.149435		0.336257	4.22355
0.334722	4.10056		0.333861	0.147859		0.337254	4.21846
0.335712	4.09614		0.334848	0.145763		0.338251	4.21471
0.336702	4.08975		0.335834	0.144586		0.339249	4.21171
0.337692	4.08514		0.33682	0.143643		0.340246	4.20825
0.338682	4.08039		0.337807	0.142799		0.341243	4.20413
0.339671	4.07533		0.338793	0.141492		0.342241	4.20009
0.340662	4.06941		0.33978	0.140709		0.343238	4.19542
0.341651	4.06376		0.340766	0.139156		0.344236	4.19147
0.342641	4.05914		0.341752	0.138485		0.345233	4.18792
0.343631	4.05525		0.342739	0.136492		0.34623	4.18398
0.344621	4.05079		0.343725	0.136013		0.347228	4.18049
0.345611	4.04636		0.344712	0.136336		0.348225	4.17712
0.346601	4.04141		0.345698	0.135243		0.349222	4.17325
0.347591	4.03627		0.346684	0.134258		0.35022	4.16864
0.348581	4.03205		0.347671	0.133845		0.351217	4.16406
0.349571	4.02753		0.348657	0.133144		0.352214	4.16026
0.350561	4.0224		0.349644	0.132597		0.353212	4.15631
0.351551	4.01807		0.35063	0.130989		0.354209	4.15284
0.352541	4.01281		0.351616	0.130506		0.355206	4.14968
0.353531	4.00784		0.352603	0.129771		0.356204	4.14636
0.354521	4.00297		0.353589	0.129228		0.357201	4.14244
0.355511	3.99915		0.354576	0.128613		0.358198	4.13891
0.356501	3.99451		0.355562	0.128312		0.359196	4.1357
0.357491	3.98959		0.356548	0.127014		0.360193	4.13159
0.358481	3.98542		0.357535	0.125759		0.361191	4.12758
0.359471	3.98067		0.358521	0.125182		0.362188	4.12382
0.360461	3.97588		0.359508	0.126026		0.363185	4.12061
0.361451	3.97225		0.360494	0.126497		0.364183	4.11777
0.362441	3.96858		0.36148	0.126989		0.36518	4.11432
0.363431	3.96456		0.362467	0.126306		0.366177	4.11018
0.364421	3.96043		0.363453	0.126446		0.367175	4.10545
0.365411	3.95695		0.36444	0.126058		0.368172	4.10106
0.3664	3.95227		0.365426	0.126722		0.369169	4.09686
0.36739	3.94798		0.366412	0.126994		0.370167	4.09322
0.36838	3.9431		0.367399	0.127809		0.371164	4.08976
0.36937	3.93807		0.368385	0.127568		0.372161	4.08618
0.37036	3.93437		0.369372	0.126779		0.373159	4.08316
0.37135	3.92911		0.370358	0.125168		0.374156	4.07938
0.37234	3.92575		0.371344	0.124295		0.375153	4.07547
0.37333	3.92135		0.372331	0.124267		0.376151	4.07133
0.37432	3.91702		0.373317	0.124907		0.377148	4.06758
0.37531	3.91202		0.374304	0.124556		0.378145	4.06357
0.3763	3.90773		0.37529	0.123822		0.379143	4.05962
0.37729	3.90412		0.376276	0.122709		0.38014	4.05567
0.37828	3.90016		0.377263	0.122097		0.381138	4.05166
0.37927	3.89661		0.378249	0.122169		0.382135	4.04722
0.38026	3.89188		0.379236	0.122355		0.383132	4.04321
0.38125	3.88762		0.380222	0.121773		0.38413	4.03965
0.38224	3.88359		0.381208	0.121431		0.385127	4.03582
0.38323	3.87931		0.382195	0.120719		0.386124	4.03203
0.38422	3.87547		0.383181	0.120515		0.387122	4.02897
0.38521	3.87135		0.384168	0.121496		0.388119	4.02522
0.3862	3.8681		0.385154	0.121944		0.389116	4.02135
0.38719	3.86465		0.38614	0.121388		0.390114	4.01755
0.38818	3.86047		0.387127	0.120911		0.391111	4.01434
0.38917	3.85604		0.388113	0.121044		0.392108	4.01093
0.390159	3.85249		0.3891	0.121424		0.393106	4.00723
0.39115	3.84915		0.390086	0.122025		0.394103	4.00337
0.392139	3.84478		0.391073	0.121524		0.3951	3.99932
0.393129	3.83953		0.392059	0.120862		0.396098	3.99558
0.394119	3.83462		0.393045	0.119587		0.397095	3.9918
0.395109	3.83029		0.394032	0.119114		0.398093	3.98842
0.396099	3.82567		0.395018	0.119773		0.39909	3.9854
0.397089	3.82184		0.396004	0.120085		0.400087	3.98213
0.398079	3.81867		0.396991	0.11965		0.401085	3.97893
0.399069	3.8156		0.397977	0.119469		0.402082	3.97479
0.400059	3.81177		0.398964	0.119312		0.403079	3.97062
0.401049	3.80759		0.39995	0.119278		0.404077	3.96732
0.402039	3.80411		0.400936	0.118955		0.405074	3.9631
0.403029	3.80078		0.401923	0.118573		0.406071	3.9589
0.404019	3.79748		0.402909	0.118001		0.407069	3.95586
0.405009	3.79403		0.403896	0.117627		0.408066	3.95281
0.405999	3.79002		0.404882	0.117549		0.409063	3.94958
0.406989	3.78643		0.405869	0.117792		0.410061	3.94724
0.407979	3.78318		0.406855	0.11837		0.411058	3.94482
0.408969	3.77917		0.407841	0.118288		0.412055	3.94177
0.409959	3.77526		0.408828	0.117559		0.413053	3.93809
0.410949	3.771		0.409814	0.117198		0.41405	3.93427
0.411939	3.7662		0.410801	0.117343		0.415048	3.93125
0.412929	3.76266		0.411787	0.117251		0.416045	3.9281
0.413919	3.75936		0.412773	0.116686		0.417042	3.92428
0.414909	3.75559		0.41376	0.11574		0.41804	3.9208
0.415898	3.75216		0.414746	0.114532		0.419037	3.91746
0.416888	3.74871		0.415733	0.112845		0.420034	3.91416
0.417878	3.74558		0.416719	0.111991		0.421032	3.91124
0.418868	3.74226		0.417705	0.111176		0.422029	3.90833
0.419858	3.73861		0.418692	0.111133		0.423026	3.90557
0.420848	3.73511		0.419678	0.111794		0.424024	3.90327
0.421838	3.73196		0.420665	0.112154		0.425021	3.90025
0.422828	3.7286		0.421651	0.11128		0.426018	3.89715
0.423818	3.72528		0.422637	0.110313		0.427016	3.89449
0.424808	3.72183		0.423624	0.109974		0.428013	3.89141
0.425798	3.71869		0.42461	0.110201		0.429011	3.88886
0.426788	3.71495		0.425597	0.110305		0.430008	3.8865
0.427778	3.71051		0.426583	0.110538		0.431005	3.88385
0.428768	3.70612		0.427569	0.110547		0.432003	3.88113
0.429758	3.7024		0.428556	0.110282		0.433	3.87845
0.430748	3.69914		0.429542	0.109361		0.433997	3.87564
0.431738	3.69586		0.430529	0.109137		0.434995	3.87237
0.432728	3.6928		0.431515	0.109658		0.435992	3.86949
0.433718	3.68947		0.432501	0.109546		0.436989	3.86686
0.434708	3.68591		0.433488	0.10908		0.437987	3.86423
0.435698	3.68243		0.434474	0.108522		0.438984	3.86141
0.436688	3.67891		0.435461	0.108197		0.439981	3.85885
0.437678	3.67571		0.436447	0.108052		0.440979	3.85604
0.438668	3.67326		0.437433	0.107524		0.441976	3.85288
0.439658	3.6706		0.43842	0.106659		0.442973	3.84994
0.440647	3.66674		0.439406	0.105877		0.443971	3.84739
0.441638	3.6631		0.440393	0.105513		0.444968	3.84506
0.442627	3.66077		0.441379	0.105844		0.445966	3.84244
0.443617	3.65897		0.442365	0.10646		0.446963	3.83973
0.444607	3.65618		0.443352	0.107445		0.44796	3.83652
0.445597	3.6529		0.444338	0.106564		0.448958	3.83334
0.446587	3.64951		0.445325	0.106043		0.449955	3.83043
0.447577	3.64486		0.446311	0.106605		0.450952	3.82793
0.448567	3.64033		0.447297	0.106766		0.45195	3.82557
0.449557	3.63544		0.448284	0.10601		0.452947	3.82321
0.450547	3.63273		0.44927	0.105745		0.453944	3.82066
0.451537	3.63053		0.450257	0.104943		0.454942	3.81811
0.452527	3.62717		0.451243	0.105406		0.455939	3.81579
0.453517	3.62392		0.452229	0.10571		0.456936	3.81256
0.454507	3.62104		0.453216	0.107014		0.457934	3.80955
0.455497	3.61743		0.454202	0.106536		0.458931	3.80656
0.456487	3.61439		0.455189	0.106021		0.459929	3.80315
0.457477	3.61186		0.456175	0.105939		0.460926	3.7999
0.458467	3.60835		0.457161	0.106143		0.461923	3.79677
0.459457	3.60597		0.458148	0.10569		0.462921	3.79441
0.460447	3.60239		0.459134	0.105546		0.463918	3.7913
0.461437	3.60043		0.460121	0.104577		0.464915	3.78819
0.462427	3.59781		0.461107	0.103859		0.465913	3.78511
0.463417	3.5943		0.462093	0.103444		0.46691	3.78294
0.464406	3.59171		0.46308	0.103263		0.467907	3.78067
0.465397	3.58856		0.464066	0.102881		0.468905	3.7782
0.466386	3.58616		0.465053	0.103753		0.469902	3.77649
0.467376	3.5836		0.466039	0.1041		0.470899	3.77374
0.468366	3.58064		0.467025	0.103301		0.471897	3.77057
0.469356	3.57768		0.468012	0.10229		0.472894	3.76708
0.470346	3.57555		0.468998	0.102156		0.473891	3.76408
0.471336	3.57202		0.469985	0.102052		0.474889	3.76126
0.472326	3.56884		0.470971	0.102753		0.475886	3.75864
0.473316	3.56643		0.471957	0.103106		0.476884	3.75578
0.474306	3.56418		0.472944	0.103355		0.477881	3.75259
0.475296	3.56152		0.47393	0.103022		0.478878	3.74976
0.476286	3.55873		0.474917	0.102465		0.479876	3.74626
0.477276	3.55603		0.475903	0.101968		0.480873	3.74299
0.478266	3.55351		0.476889	0.101563		0.48187	3.7401
0.479256	3.55164		0.477876	0.101288		0.482868	3.73738
0.480246	3.54912		0.478862	0.101578		0.483865	3.73418
0.481236	3.54628		0.479849	0.101459		0.484862	3.73191
0.482226	3.54297		0.480835	0.1009		0.48586	3.73028
0.483216	3.53985		0.481822	0.100979		0.486857	3.72812
0.484206	3.53743		0.482808	0.100687		0.487854	3.725
0.485196	3.53494		0.483794	0.100831		0.488852	3.72207
0.486186	3.53264		0.484781	0.101805		0.489849	3.71926
0.487176	3.53013		0.485767	0.102164		0.490846	3.7168
0.488166	3.52746		0.486753	0.102009		0.491844	3.71483
0.489156	3.5249		0.48774	0.101973		0.492841	3.71257
0.490146	3.52252		0.488726	0.101686		0.493839	3.71025
0.491135	3.52036		0.489713	0.101636		0.494836	3.70763
0.492125	3.51807		0.490699	0.101159		0.495833	3.7054
0.493115	3.51536		0.491686	0.100818		0.496831	3.70329
0.494105	3.51214		0.492672	0.099986		0.497828	3.70119
0.495095	3.50864		0.493658	0.100521		0.498825	3.69856
0.496085	3.5058		0.494645	0.100674		0.499823	3.69674
0.497075	3.50394		0.495631	0.099672		0.50082	3.69339
0.498065	3.50217		0.496618	0.099297		0.501817	3.6904
0.499055	3.50039		0.497604	0.099275		0.502815	3.68782
0.500045	3.49876		0.49859	0.098878		0.503812	3.68527
0.501035	3.49639		0.499577	0.100058		0.504809	3.68261
0.502025	3.49359		0.500563	0.099141		0.505807	3.67962
0.503015	3.4912		0.501549	0.100078		0.506804	3.67736
0.504005	3.48838		0.502536	0.098377		0.507801	3.67469
0.504995	3.48547		0.503522	0.09729		0.508799	3.67249
0.505985	3.48302		0.504509	0.097918		0.509796	3.67055
0.506975	3.47985		0.505495	0.096899		0.510793	3.66855
0.507965	3.47676		0.506482	0.096375		0.511791	3.66545
0.508955	3.47381		0.507468	0.097273		0.512788	3.66174
0.509945	3.47072		0.508454	0.096534		0.513786	3.65869
0.510935	3.46815		0.509441	0.096576		0.514783	3.65639
0.511925	3.46539		0.510427	0.096501		0.51578	3.65396
0.512915	3.46245		0.511414	0.096786		0.516778	3.65056
0.513905	3.45939		0.5124	0.096524		0.517775	3.64805
0.514894	3.45677		0.513386	0.096944		0.518772	3.64545
0.515885	3.45399		0.514373	0.096797		0.51977	3.64243
0.516874	3.45105		0.515359	0.096265		0.520767	3.63944
0.517864	3.44846		0.516346	0.096312		0.521764	3.63737
0.518854	3.44586		0.517332	0.096943		0.522762	3.63481
0.519844	3.44263		0.518318	0.097039		0.523759	3.6322
0.520834	3.43936		0.519305	0.096993		0.524756	3.63023
0.521824	3.43724		0.520291	0.097128		0.525754	3.6286
0.522814	3.43468		0.521278	0.096895		0.526751	3.62593
0.523804	3.43164		0.522264	0.096619		0.527748	3.62392
0.524794	3.42857		0.52325	0.096371		0.528746	3.6214
0.525784	3.42597		0.524237	0.09642		0.529743	3.61915
0.526774	3.42345		0.525223	0.096151		0.530741	3.61735
0.527764	3.42107		0.52621	0.096017		0.531738	3.61495
0.528754	3.41846		0.527196	0.095987		0.532735	3.6124
0.529744	3.41524		0.528182	0.096594		0.533733	3.61015
0.530734	3.4124		0.529169	0.096704		0.53473	3.60714
0.531724	3.40968		0.530155	0.096954		0.535727	3.60405
0.532714	3.40709		0.531142	0.096663		0.536725	3.60092
0.533704	3.40452		0.532128	0.096752		0.537722	3.59869
0.534694	3.40181		0.533114	0.097164		0.538719	3.59652
0.535684	3.39944		0.534101	0.096632		0.539717	3.59492
0.536674	3.39695		0.535087	0.095978		0.540714	3.59211
0.537664	3.39383		0.536074	0.096239		0.541711	3.58918
0.538654	3.39058		0.53706	0.096028		0.542709	3.58676
0.539644	3.38771		0.538046	0.09585		0.543706	3.58456
0.540633	3.3854		0.539033	0.095481		0.544703	3.58268
0.541623	3.38259		0.540019	0.095454		0.545701	3.58019
0.542613	3.3797		0.541006	0.095428		0.546698	3.5774
0.543603	3.37716		0.541992	0.09549		0.547696	3.57479
0.544593	3.37516		0.542978	0.094884		0.548693	3.57303
0.545583	3.37291		0.543965	0.0941		0.54969	3.57089
0.546573	3.37067		0.544951	0.09428		0.550688	3.56895
0.547563	3.36784		0.545938	0.093264		0.551685	3.56695
0.548553	3.36555		0.546924	0.093188		0.552682	3.56488
0.549543	3.36268		0.54791	0.092896		0.55368	3.56195
0.550533	3.35936		0.548897	0.092598		0.554677	3.56071
0.551523	3.35635		0.549883	0.092973		0.555674	3.55973
0.552513	3.35349		0.55087	0.092441		0.556672	3.55779
0.553503	3.35016		0.551856	0.092639		0.557669	3.55496
0.554493	3.34777		0.552842	0.09287		0.558666	3.55164
0.555483	3.34519		0.553829	0.092772		0.559664	3.54889
0.556473	3.34268		0.554815	0.092956		0.560661	3.54538
0.557463	3.33994		0.555802	0.093107		0.561659	3.54386
0.558453	3.33678		0.556788	0.092735		0.562656	3.54154
0.559443	3.33397		0.557774	0.093383		0.563653	3.5398
0.560433	3.33185		0.558761	0.093961		0.564651	3.53726
0.561423	3.32918		0.559747	0.093651		0.565648	3.53481
0.562413	3.32711		0.560734	0.093201		0.566645	3.53342
0.563403	3.32456		0.56172	0.093336		0.567643	3.53121
0.564393	3.32176		0.562706	0.093521		0.56864	3.52868
0.565382	3.31895		0.563693	0.093567		0.569637	3.52612
0.566373	3.31652		0.564679	0.093338		0.570635	3.52357
0.567362	3.31365		0.565666	0.09351		0.571632	3.52068
0.568352	3.31023		0.566652	0.094399		0.572629	3.51886
0.569342	3.3081		0.567639	0.094032		0.573627	3.51514
0.570332	3.3068		0.568625	0.093885		0.574624	3.5122
0.571322	3.30476		0.569611	0.092459		0.575621	3.5086
0.572312	3.30177		0.570598	0.09265		0.576619	3.50575
0.573302	3.29945		0.571584	0.092613		0.577616	3.50314
0.574292	3.29741		0.57257	0.091794		0.578614	3.50037
0.575282	3.29434		0.573557	0.091944		0.579611	3.49868
0.576272	3.29169		0.574543	0.092339		0.580608	3.49583
0.577262	3.28902		0.57553	0.09244		0.581606	3.49354
0.578252	3.28652		0.576516	0.092476		0.582603	3.49074
0.579242	3.28369		0.577502	0.09204		0.5836	3.4883
0.580232	3.28098		0.578489	0.092537		0.584598	3.48651
0.581222	3.27935		0.579475	0.092874		0.585595	3.48425
0.582212	3.2769		0.580462	0.092953		0.586592	3.48183
0.583202	3.27437		0.581448	0.092661		0.58759	3.47863
0.584192	3.27138		0.582435	0.092552		0.588587	3.47618
0.585182	3.26841		0.583421	0.092265		0.589584	3.4728
0.586172	3.26516		0.584407	0.091981		0.590582	3.46952
0.587162	3.26325		0.585394	0.091736		0.591579	3.46698
0.588152	3.26087		0.58638	0.092597		0.592577	3.46419
0.589142	3.25903		0.587366	0.093868		0.593574	3.46164
0.590132	3.25579		0.588353	0.094042		0.594571	3.45886
0.591121	3.25267		0.589339	0.094551		0.595569	3.45584
0.592111	3.25012		0.590326	0.095215		0.596566	3.4533
0.593101	3.24753		0.591312	0.094886		0.597563	3.45132
0.594091	3.24439		0.592299	0.09486		0.598561	3.4483
0.595081	3.2417		0.593285	0.094985		0.599558	3.44469
0.596071	3.23977		0.594271	0.094642		0.600555	3.44246
0.597061	3.23769		0.595258	0.095147		0.601553	3.43916
0.598051	3.23454		0.596244	0.094779		0.60255	3.43704
0.599041	3.23205		0.597231	0.094605		0.603547	3.4342
0.600031	3.2301		0.598217	0.09426		0.604545	3.43096
0.601021	3.22791		0.599203	0.094311		0.605542	3.42769
0.602011	3.22591		0.60019	0.093873		0.606539	3.42441
0.603001	3.22421		0.601176	0.092992		0.607537	3.42154
0.603991	3.22231		0.602163	0.092776		0.608534	3.41923
0.604981	3.22005		0.603149	0.09251		0.609532	3.41675
0.605971	3.21763		0.604135	0.092752		0.610529	3.41394
0.606961	3.21571		0.605122	0.092699		0.611526	3.41165
0.607951	3.21363		0.606108	0.092483		0.612524	3.40974
0.608941	3.21167		0.607095	0.092018		0.613521	3.40705
0.609931	3.20958		0.608081	0.091648		0.614518	3.40483
0.610921	3.20667		0.609067	0.091835		0.615516	3.40266
0.611911	3.20355		0.610054	0.091957		0.616513	3.39954
0.612901	3.20049		0.61104	0.091883		0.61751	3.39664
0.613891	3.19818		0.612027	0.091687		0.618508	3.39376
0.614881	3.19596		0.613013	0.091		0.619505	3.39085
0.61587	3.19312		0.613999	0.090774		0.620502	3.38865
0.61686	3.1905		0.614986	0.090722		0.6215	3.38679
0.61785	3.1883		0.615972	0.090191		0.622497	3.38417
0.61884	3.1862		0.616959	0.090408		0.623494	3.38215
0.61983	3.18355		0.617945	0.090756		0.624492	3.37981
0.62082	3.18053		0.618931	0.091271		0.625489	3.37771
0.62181	3.17774		0.619918	0.092244		0.626486	3.37568
0.6228	3.17546		0.620904	0.092294		0.627484	3.37306
0.62379	3.17269		0.621891	0.092258		0.628481	3.37057
0.62478	3.17033		0.622877	0.092677		0.629479	3.36633
0.62577	3.16795		0.623863	0.092773		0.630476	3.36346
0.62676	3.16519		0.62485	0.092572		0.631473	3.36043
0.62775	3.16268		0.625836	0.092709		0.632471	3.35785
0.62874	3.16012		0.626823	0.092896		0.633468	3.35495
0.62973	3.15778		0.627809	0.092345		0.634465	3.35286
0.63072	3.15529		0.628795	0.091904		0.635463	3.34992
0.63171	3.15243		0.629782	0.091591		0.63646	3.34664
0.6327	3.14987		0.630768	0.091501		0.637457	3.34432
0.63369	3.14765		0.631755	0.092029		0.638455	3.34202
0.63468	3.14584		0.632741	0.091994		0.639452	3.33932
0.63567	3.14351		0.633727	0.091287		0.640449	3.33748
0.63666	3.14117		0.634714	0.09105		0.641447	3.3349
0.63765	3.13866		0.6357	0.090679		0.642444	3.33289
0.63864	3.1361		0.636687	0.089855		0.643441	3.33105
0.639629	3.13327		0.637673	0.089272		0.644439	3.32839
0.64062	3.1318		0.638659	0.088936		0.645436	3.32554
0.641609	3.13001		0.639646	0.08857		0.646434	3.32244
0.642599	3.12774		0.640632	0.08827		0.647431	3.31871
0.643589	3.12597		0.641619	0.088309		0.648428	3.31646
0.644579	3.12405		0.642605	0.088111		0.649426	3.3137
0.645569	3.12118		0.643591	0.087757		0.650423	3.30992
0.646559	3.11791		0.644578	0.088027		0.65142	3.3073
0.647549	3.11564		0.645564	0.088906		0.652418	3.30462
0.648539	3.11347		0.646551	0.089305		0.653415	3.30268
0.649529	3.11081		0.647537	0.089508		0.654412	3.29898
0.650519	3.10893		0.648523	0.089451		0.65541	3.29655
0.651509	3.10686		0.64951	0.089361		0.656407	3.29419
0.652499	3.10341		0.650496	0.089958		0.657404	3.29251
0.653489	3.10164		0.651483	0.090205		0.658402	3.29095
0.654479	3.09934		0.652469	0.090273		0.659399	3.28794
0.655469	3.0969		0.653455	0.089746		0.660396	3.28651
0.656459	3.09439		0.654442	0.08902		0.661394	3.28409
0.657449	3.09096		0.655428	0.088408		0.662391	3.28077
0.658439	3.0888		0.656415	0.087761		0.663388	3.2785
0.659429	3.08579		0.657401	0.087579		0.664386	3.27541
0.660419	3.08313		0.658387	0.087291		0.665383	3.27206
0.661409	3.08173		0.659374	0.087496		0.666381	3.26961
0.662399	3.08067		0.66036	0.088098		0.667378	3.26724
0.663389	3.07858		0.661347	0.088189		0.668375	3.26473
0.664379	3.0759		0.662333	0.089035		0.669373	3.26189
0.665369	3.0743		0.663319	0.090488		0.67037	3.25857
0.666358	3.07328		0.664306	0.090748		0.671367	3.25557
0.667348	3.07069		0.665292	0.091082		0.672365	3.25296
0.668338	3.06792		0.666279	0.090662		0.673362	3.25126
0.669328	3.06523		0.667265	0.090378		0.674359	3.24878
0.670318	3.0624		0.668252	0.09075		0.675357	3.24607
0.671308	3.06006		0.669238	0.090298		0.676354	3.24323
0.672298	3.05776		0.670224	0.090108		0.677351	3.24051
0.673288	3.05504		0.671211	0.090078		0.678349	3.23796
0.674278	3.05234		0.672197	0.088886		0.679346	3.23647
0.675268	3.0496		0.673184	0.087893		0.680344	3.23439
0.676258	3.04707		0.67417	0.088194		0.681341	3.23235
0.677248	3.04424		0.675156	0.088086		0.682338	3.2303
0.678238	3.0418		0.676143	0.087719		0.683336	3.22825
0.679228	3.03993		0.677129	0.087886		0.684333	3.22465
0.680218	3.03793		0.678115	0.087248		0.68533	3.22154
0.681208	3.03502		0.679102	0.086307		0.686328	3.21949
0.682198	3.0329		0.680088	0.086001		0.687325	3.21754
0.683188	3.0306		0.681075	0.085443		0.688322	3.21467
0.684178	3.0272		0.682061	0.084756		0.68932	3.21208
0.685168	3.02455		0.683048	0.084593		0.690317	3.20913
0.686158	3.02266		0.684034	0.0846		0.691314	3.20626
0.687148	3.02026		0.68502	0.084496		0.692312	3.20305
0.688138	3.01732		0.686007	0.084331		0.693309	3.20002
0.689128	3.01484		0.686993	0.084159		0.694306	3.19673
0.690117	3.01222		0.68798	0.083789		0.695304	3.19426
0.691108	3.00971		0.688966	0.084423		0.696301	3.19201
0.692097	3.00747		0.689952	0.085463		0.697299	3.18921
0.693087	3.00394		0.690939	0.085511		0.698296	3.18656
0.694077	3.00084		0.691925	0.085442		0.699293	3.18481
0.695067	2.99874		0.692912	0.08562		0.700291	3.18304
0.696057	2.99725		0.693898	0.085383		0.701288	3.18061
0.697047	2.99494		0.694884	0.084787		0.702285	3.17762
0.698037	2.99259		0.695871	0.08403		0.703283	3.17478
0.699027	2.98964		0.696857	0.083318		0.70428	3.17329
0.700017	2.9862		0.697844	0.083099		0.705277	3.17123
0.701007	2.98293		0.69883	0.082314		0.706275	3.16898
0.701997	2.9803		0.699816	0.081946		0.707272	3.16617
0.702987	2.97791		0.700803	0.082249		0.708269	3.16324
0.703977	2.97529		0.701789	0.082444		0.709267	3.16113
0.704967	2.97229		0.702776	0.082981		0.710264	3.15763
0.705957	2.97008		0.703762	0.083377		0.711262	3.15481
0.706947	2.9685		0.704748	0.083845		0.712259	3.15308
0.707937	2.9666		0.705735	0.084194		0.713256	3.15072
0.708927	2.96456		0.706721	0.084517		0.714254	3.14854
0.709917	2.96254		0.707708	0.084363		0.715251	3.14604
0.710907	2.95969		0.708694	0.084512		0.716248	3.14302
0.711897	2.95604		0.70968	0.08397		0.717246	3.13996
0.712887	2.95265		0.710667	0.083932		0.718243	3.13723
0.713877	2.94978		0.711653	0.083119		0.71924	3.13513
0.714867	2.94645		0.71264	0.081572		0.720238	3.13286
0.715856	2.94331		0.713626	0.08069		0.721235	3.12996
0.716846	2.94073		0.714612	0.080522		0.722232	3.12759
0.717836	2.93828		0.715599	0.080145		0.72323	3.12548
0.718826	2.9359		0.716585	0.080264		0.724227	3.12341
0.719816	2.93379		0.717572	0.079676		0.725224	3.12104
0.720806	2.93122		0.718558	0.079168		0.726222	3.11845
0.721796	2.92827		0.719544	0.07905		0.727219	3.11554
0.722786	2.9254		0.720531	0.078623		0.728217	3.11321
0.723776	2.92301		0.721517	0.079652		0.729214	3.11051
0.724766	2.92074		0.722504	0.080556		0.730211	3.10736
0.725756	2.91841		0.72349	0.08029		0.731209	3.10395
0.726746	2.91616		0.724476	0.080311		0.732206	3.10051
0.727736	2.91372		0.725463	0.080211		0.733203	3.09745
0.728726	2.91108		0.726449	0.079777		0.734201	3.09608
0.729716	2.9082		0.727436	0.080202		0.735198	3.09423
0.730706	2.90517		0.728422	0.080924		0.736195	3.09118
0.731696	2.90233		0.729408	0.081602		0.737193	3.08857
0.732686	2.89977		0.730395	0.081179		0.73819	3.08651
0.733676	2.89749		0.731381	0.08051		0.739187	3.08414
0.734666	2.89564		0.732368	0.080764		0.740185	3.08144
0.735656	2.89282		0.733354	0.080866		0.741182	3.07902
0.736646	2.88886		0.73434	0.080402		0.742179	3.07677
0.737636	2.88626		0.735327	0.080666		0.743177	3.07434
0.738626	2.88412		0.736313	0.080575		0.744174	3.07178
0.739616	2.88178		0.7373	0.081304		0.745172	3.06965
0.740605	2.87886		0.738286	0.081011		0.746169	3.0672
0.741596	2.87574		0.739272	0.079634		0.747166	3.06455
0.742585	2.87273		0.740259	0.079518		0.748164	3.06135
0.743575	2.87074		0.741245	0.079811		0.749161	3.05821
0.744565	2.86827		0.742232	0.079185		0.750158	3.05543
0.745555	2.86574		0.743218	0.079728		0.751156	3.05327
0.746545	2.86292		0.744204	0.07971		0.752153	3.05123
0.747535	2.86039		0.745191	0.080465		0.75315	3.04833
0.748525	2.85783		0.746177	0.081408		0.754148	3.04567
0.749515	2.85611		0.747164	0.08142		0.755145	3.04299
0.750505	2.85412		0.74815	0.081283		0.756142	3.03972
0.751495	2.85195		0.749136	0.082617		0.75714	3.0364
0.752485	2.84964		0.750123	0.082098		0.758137	3.03304
0.753475	2.84663		0.751109	0.08123		0.759134	3.03012
0.754465	2.84419		0.752096	0.080895		0.760132	3.02761
0.755455	2.84182		0.753082	0.080698		0.761129	3.02549
0.756445	2.83915		0.754068	0.080231		0.762127	3.02274
0.757435	2.8356		0.755055	0.081341		0.763124	3.01994
0.758425	2.83222		0.756041	0.080906		0.764121	3.01679
0.759415	2.8291		0.757028	0.081535		0.765119	3.01455
0.760405	2.82725		0.758014	0.081293		0.766116	3.01293
0.761395	2.82496		0.759001	0.081669		0.767113	3.01122
0.762385	2.82287		0.759987	0.081789		0.768111	3.00914
0.763375	2.82073		0.760973	0.08237		0.769108	3.00668
0.764365	2.81858		0.76196	0.083832		0.770105	3.00404
0.765355	2.81678		0.762946	0.083862		0.771103	3.00165
0.766344	2.81353		0.763932	0.082657		0.7721	2.99914
0.767334	2.81061		0.764919	0.08303		0.773097	2.99617
0.768324	2.80839		0.765905	0.082233		0.774095	2.99314
0.769314	2.80589		0.766892	0.081755		0.775092	2.99024
0.770304	2.8033		0.767878	0.082441		0.776089	2.98744
0.771294	2.8008		0.768865	0.082208		0.777087	2.98496
0.772284	2.79887		0.769851	0.082812		0.778084	2.98265
0.773274	2.79636		0.770837	0.082549		0.779081	2.97982
0.774264	2.79317		0.771824	0.082598		0.780079	2.97734
0.775254	2.79112		0.77281	0.082663		0.781076	2.9754
0.776244	2.78808		0.773797	0.082679		0.782074	2.9738
0.777234	2.78607		0.774783	0.083061		0.783071	2.9714
0.778224	2.783		0.775769	0.083016		0.784068	2.96788
0.779214	2.78029		0.776756	0.082501		0.785066	2.96446
0.780204	2.77818		0.777742	0.08199		0.786063	2.96177
0.781194	2.77614		0.778728	0.08154		0.78706	2.95931
0.782184	2.77314		0.779715	0.082058		0.788058	2.95642
0.783174	2.77032		0.780701	0.083101		0.789055	2.95371
0.784164	2.76776		0.781688	0.083267		0.790052	2.95143
0.785154	2.76522		0.782674	0.083746		0.79105	2.94909
0.786144	2.76341		0.783661	0.083737		0.792047	2.94661
0.787134	2.76023		0.784647	0.083789		0.793044	2.94388
0.788124	2.7572		0.785633	0.083124		0.794042	2.94123
0.789114	2.75454		0.78662	0.08314		0.795039	2.93843
0.790104	2.75177		0.787606	0.083995		0.796036	2.93561
0.791093	2.74855		0.788593	0.083593		0.797034	2.93299
0.792083	2.74612		0.789579	0.082796		0.798031	2.93031
0.793073	2.74375		0.790565	0.082624		0.799029	2.92761
0.794063	2.74094		0.791552	0.0837		0.800026	2.92497
0.795053	2.73805		0.792538	0.083236		0.801023	2.92191
0.796043	2.73579		0.793525	0.082977		0.802021	2.91812
0.797033	2.73296		0.794511	0.082778		0.803018	2.91482
0.798023	2.73066		0.795497	0.082382		0.804015	2.91186
0.799013	2.72912		0.796484	0.082962		0.805013	2.90891
0.800003	2.72645		0.79747	0.083375		0.80601	2.90647
0.800993	2.72405		0.798457	0.083212		0.807007	2.90426
0.801983	2.72164		0.799443	0.08341		0.808005	2.90195
0.802973	2.71947		0.800429	0.083891		0.809002	2.89912
0.803963	2.71736		0.801416	0.084238		0.809999	2.89607
0.804953	2.71519		0.802402	0.083252		0.810997	2.89335
0.805943	2.71187		0.803389	0.082977		0.811994	2.89053
0.806933	2.71013		0.804375	0.082338		0.812991	2.8873
0.807923	2.70821		0.805361	0.081346		0.813989	2.88438
0.808913	2.70616		0.806348	0.080113		0.814986	2.88232
0.809903	2.7032		0.807334	0.079418		0.815984	2.87937
0.810893	2.7007		0.808321	0.079457		0.816981	2.876
0.811883	2.69765		0.809307	0.078613		0.817978	2.87361
0.812873	2.69455		0.810293	0.078334		0.818976	2.87135
0.813863	2.6919		0.81128	0.077398		0.819973	2.86877
0.814853	2.68917		0.812266	0.077587		0.82097	2.86606
0.815843	2.68656		0.813253	0.078421		0.821968	2.86295
0.816832	2.68442		0.814239	0.078345		0.822965	2.85917
0.817822	2.68213		0.815225	0.078683		0.823962	2.85529
0.818812	2.67914		0.816212	0.078395		0.82496	2.85313
0.819802	2.67601		0.817198	0.078148		0.825957	2.85063
0.820792	2.67343		0.818185	0.078726		0.826954	2.84818
0.821782	2.67083		0.819171	0.078488		0.827952	2.84596
0.822772	2.66796		0.820158	0.079623		0.828949	2.84342
0.823762	2.66518		0.821144	0.079442		0.829947	2.84064
0.824752	2.66232		0.82213	0.078744		0.830944	2.83793
0.825742	2.6596		0.823117	0.078742		0.831941	2.83529
0.826732	2.65696		0.824103	0.078527		0.832939	2.83247
0.827722	2.65439		0.825089	0.078775		0.833936	2.82967
0.828712	2.65207		0.826076	0.078614		0.834933	2.82707
0.829702	2.64943		0.827062	0.079506		0.835931	2.82444
0.830692	2.64674		0.828049	0.080029		0.836928	2.82073
0.831682	2.64459		0.829035	0.080143		0.837925	2.81676
0.832672	2.64295		0.830021	0.079935		0.838923	2.81345
0.833662	2.64117		0.831008	0.080057		0.83992	2.80994
0.834652	2.63834		0.831994	0.07986		0.840917	2.80717
0.835642	2.63513		0.832981	0.079657		0.841915	2.80402
0.836632	2.63264		0.833967	0.079529		0.842912	2.80071
0.837622	2.63049		0.834954	0.080212		0.843909	2.79772
0.838611	2.62775		0.83594	0.080575		0.844907	2.79453
0.839602	2.62422		0.836926	0.080333		0.845904	2.7917
0.840592	2.62123		0.837913	0.080846		0.846902	2.78943
0.841581	2.61909		0.838899	0.081403		0.847899	2.78711
0.842571	2.61697		0.839885	0.081861		0.848896	2.78439
0.843561	2.61431		0.840872	0.081178		0.849894	2.78108
0.844551	2.61179		0.841858	0.080458		0.850891	2.77779
0.845541	2.60946		0.842845	0.08046		0.851888	2.77554
0.846531	2.60693		0.843831	0.081046		0.852886	2.77297
0.847521	2.60394		0.844817	0.080798		0.853883	2.77047
0.848511	2.60031		0.845804	0.080036		0.85488	2.76741
0.849501	2.59695		0.84679	0.079706		0.855878	2.76456
0.850491	2.59411		0.847777	0.079056		0.856875	2.76177
0.851481	2.5906		0.848763	0.078522		0.857872	2.75894
0.852471	2.5873		0.84975	0.078811		0.85887	2.75702
0.853461	2.58386		0.850736	0.079097		0.859867	2.75473
0.854451	2.58054		0.851722	0.079467		0.860865	2.75141
0.855441	2.57769		0.852709	0.080298		0.861862	2.74803
0.856431	2.57516		0.853695	0.081052		0.862859	2.74534
0.857421	2.57302		0.854681	0.081752		0.863856	2.74268
0.858411	2.57055		0.855668	0.082824		0.864854	2.73939
0.859401	2.56832		0.856654	0.083868		0.865851	2.73563
0.860391	2.56615		0.857641	0.083685		0.866849	2.73285
0.861381	2.56308		0.858627	0.084153		0.867846	2.72974
0.862371	2.56056		0.859613	0.083843		0.868843	2.72648
0.863361	2.55846		0.8606	0.083832		0.869841	2.72329
0.86435	2.55559		0.861586	0.084365		0.870838	2.72041
0.865341	2.55298		0.862573	0.085005		0.871835	2.71752
0.866331	2.55044		0.863559	0.085852		0.872833	2.71462
0.86732	2.54754		0.864546	0.086098		0.87383	2.71271
0.86831	2.54488		0.865532	0.085811		0.874828	2.7088
0.8693	2.54218		0.866518	0.086302		0.875825	2.70516
0.87029	2.53976		0.867505	0.085568		0.876822	2.70273
0.87128	2.53675		0.868491	0.085279		0.877819	2.69958
0.87227	2.53324		0.869478	0.083453		0.878817	2.69606
0.87326	2.53092		0.870464	0.083136		0.879814	2.69313
0.87425	2.52867		0.87145	0.083479		0.880812	2.68919
0.87524	2.52596		0.872437	0.082902		0.881809	2.68575
0.87623	2.52314		0.873423	0.082571		0.882806	2.6825
0.87722	2.52093		0.874409	0.082826		0.883803	2.67991
0.87821	2.51797		0.875396	0.083851		0.884801	2.67675
0.8792	2.51455		0.876382	0.083694		0.885798	2.67358
0.88019	2.51156		0.877369	0.083526		0.886796	2.67155
0.88118	2.50885		0.878355	0.083333		0.887793	2.66891
0.88217	2.50488		0.879342	0.083149		0.88879	2.66603
0.88316	2.50125		0.880328	0.082798		0.889788	2.66303
0.88415	2.49799		0.881314	0.082407		0.890785	2.66012
0.88514	2.49549		0.882301	0.082685		0.891782	2.6517
0.88613	2.49347		0.883287	0.082933		0.89278	2.62395
0.88712	2.4911		0.884274	0.082318		0.893777	2.61751
0.88811	2.48785		0.88526	0.081555		0.894775	2.61284
0.889099	2.48586		0.886246	0.081686		0.895772	2.6089
0.89009	2.48431		0.887233	0.081785		0.896769	2.60698
0.89108	2.48244		0.888219	0.082341		0.897766	2.60379
0.892069	2.47909		0.889206	0.082957		0.898764	2.60122
0.893059	2.45092		0.890192	0.083732		0.899761	2.5984
0.894049	2.44427		0.891178	0.084299		0.900759	2.59629
0.895039	2.4399		0.892165	0.088165		0.901756	2.59479
0.896029	2.43478		0.893151	0.087103		0.902753	2.59274
0.897019	2.433		0.894138	0.086934		0.903751	2.59034
0.898009	2.43023		0.895124	0.087708		0.904748	2.58841
0.898999	2.42741		0.89611	0.088462		0.905745	2.58684
0.899989	2.42548		0.897097	0.088535		0.906743	2.58489
0.900979	2.42339		0.898083	0.088449		0.90774	2.58462
0.901969	2.42144		0.89907	0.088275		0.908738	2.5827
0.902959	2.42012		0.900056	0.088969		0.909735	2.58086
0.903949	2.41801		0.901042	0.089435		0.910732	2.57942
0.904939	2.41627		0.902029	0.089969		0.911729	2.57741
0.905929	2.4147		0.903015	0.09047		0.912727	2.57562
0.906919	2.41307		0.904002	0.091634		0.913724	2.57423
0.907909	2.41173		0.904988	0.092248		0.914722	2.57324
0.908899	2.41041		0.905974	0.092775		0.915719	2.57276
0.909889	2.40769		0.906961	0.093917		0.916716	2.57101
0.910879	2.4061		0.907947	0.09465		0.917714	2.56922
0.911869	2.40431		0.908934	0.094177		0.918711	2.56785
0.912859	2.40265		0.90992	0.093624		0.919708	2.56719
0.913849	2.40166		0.910906	0.093718		0.920706	2.56647
0.914838	2.40136		0.911893	0.094641		0.921703	2.56518
0.915829	2.40027		0.912879	0.095482		0.9227	2.56442
0.916818	2.39977		0.913866	0.095639		0.923698	2.56338
0.917808	2.3987		0.914852	0.095633		0.924695	2.56247
0.918798	2.39795		0.915838	0.09609		0.925692	2.56167
0.919788	2.39724		0.916825	0.096605		0.92669	2.56087
0.920778	2.39615		0.917811	0.096858		0.927687	2.55969
0.921768	2.39499		0.918798	0.097668		0.928685	2.55901
0.922758	2.3944		0.919784	0.09877		0.929682	2.55859
0.923748	2.39366		0.92077	0.099764		0.930679	2.55724
0.924738	2.39246		0.921757	0.100349		0.931677	2.55698
0.925728	2.39102		0.922743	0.100644		0.932674	2.5553
0.926718	2.3894		0.92373	0.100823		0.933671	2.55357
0.927708	2.38846		0.924716	0.100836		0.934669	2.55268
0.928698	2.38787		0.925703	0.101033		0.935666	2.55176
0.929688	2.3873		0.926689	0.101845		0.936663	2.54924
0.930678	2.38673		0.927675	0.102237		0.937661	2.5481
0.931668	2.38592		0.928662	0.102171		0.938658	2.54599
0.932658	2.38433		0.929648	0.102823		0.939655	2.54539
0.933648	2.38329		0.930634	0.103921		0.940653	2.5437
0.934638	2.38244		0.931621	0.104245		0.94165	2.54228
0.935628	2.38081		0.932607	0.104358		0.942647	2.54081
0.936618	2.3799		0.933594	0.1051		0.943645	2.54039
0.937608	2.37943		0.93458	0.10603		0.944642	2.54019
0.938598	2.3783		0.935566	0.105895		0.945639	2.53853
0.939587	2.37702		0.936553	0.105715		0.946637	2.53654
0.940577	2.37614		0.937539	0.105568		0.947634	2.53573
0.941568	2.37568		0.938526	0.105262		0.948632	2.53493
0.942557	2.37501		0.939512	0.105698		0.949629	2.53313
0.943547	2.37375		0.940499	0.105599		0.950626	2.5316
0.944537	2.37313		0.941485	0.105927		0.951624	2.52994
0.945527	2.37212		0.942471	0.105988		0.952621	2.52824
0.946517	2.37017		0.943458	0.104846		0.953618	2.52689
0.947507	2.36879		0.944444	0.105461		0.954616	2.52578
0.948497	2.3677		0.945431	0.105044		0.955613	2.52389
0.949487	2.3664		0.946417	0.103984		0.95661	2.52235
0.950477	2.3643		0.947403	0.103682		0.957608	2.51972
0.951467	2.36235		0.94839	0.103903		0.958605	2.51781
0.952457	2.36096		0.949376	0.104336		0.959602	2.51721
0.953447	2.35939		0.950362	0.104259		0.9606	2.51538
0.954437	2.35821		0.951349	0.102553		0.961597	2.51285
0.955427	2.35645		0.952335	0.10237		0.962594	2.5106
0.956417	2.35513		0.953322	0.102012		0.963592	2.50887
0.957407	2.35398		0.954308	0.101916		0.964589	2.50644
0.958397	2.35211		0.955295	0.102432		0.965587	2.50317
0.959387	2.3505		0.956281	0.102702		0.966584	2.5016
0.960377	2.34956		0.957267	0.102515		0.967581	2.49965
0.961367	2.34828		0.958254	0.102753		0.968579	2.49772
0.962357	2.34644		0.95924	0.10243		0.969576	2.4954
0.963347	2.34437		0.960227	0.101353		0.970573	2.49291
0.964337	2.34245		0.961213	0.1007		0.971571	2.49102
0.965326	2.33984		0.962199	0.099363		0.972568	2.48898
0.966317	2.33745		0.963186	0.098768		0.973565	2.48652
0.967306	2.33516		0.964172	0.098922		0.974563	2.4842
0.968296	2.33308		0.965158	0.100392		0.97556	2.48191
0.969286	2.33108		0.966145	0.099908		0.976557	2.47867
0.970276	2.32886		0.967131	0.100235		0.977555	2.47563
0.971266	2.32662		0.968118	0.099998		0.978552	2.47471
0.972256	2.32489		0.969104	0.099439		0.97955	2.47174
0.973246	2.32261		0.970091	0.099166		0.980547	2.46903
0.974236	2.32088		0.971077	0.098468		0.981544	2.46602
0.975226	2.31888		0.972063	0.097836		0.982542	2.46303
0.976216	2.31617		0.97305	0.097591		0.983539	2.46124
0.977206	2.31366		0.974036	0.096963		0.984536	2.4586
0.978196	2.30971		0.975023	0.096424		0.985534	2.45614
0.979186	2.30773		0.976009	0.095599		0.986531	2.45394
0.980176	2.30552		0.976995	0.094702		0.987528	2.45188
0.981166	2.30342		0.977982	0.094403		0.988526	2.44897
0.982156	2.30101		0.978968	0.093805		0.989523	2.44623
0.983146	2.29872		0.979954	0.092344		0.99052	2.44301
0.984136	2.29587		0.980941	0.091136		0.991518	2.44023
0.985126	2.29365		0.981927	0.090768		0.992515	2.43758
0.986116	2.29089		0.982914	0.090697		0.993513	2.43385
0.987106	2.2878		0.9839	0.090587		0.99451	2.43045
0.988096	2.28539		0.984887	0.090514		0.995507	2.42646
0.989086	2.28295		0.985873	0.090479		0.996504	2.42306
0.990075	2.27967		0.986859	0.089904		0.997502	2.41951
0.991065	2.27623		0.987846	0.089482		0.998499	2.41612
0.992056	2.27322		0.988832	0.089658		0.999497	2.41398
0.993045	2.2711		0.989819	0.08993		1.00049	2.41064
0.994035	2.2685		0.990805	0.090173		1.00149	2.40743
0.995025	2.26532		0.991791	0.090127		1.00249	2.40497
0.996015	2.26323		0.992778	0.090267		1.00349	2.40211
0.997005	2.26039		0.993764	0.089671		1.00448	2.39909
0.997995	2.25716		0.99475	0.089246		1.00548	2.39682
0.998985	2.25415		0.995737	0.089817		1.00648	2.39468
0.999975	2.25182		0.996723	0.090564		1.00747	2.39183
1.00097	2.25051		0.99771	0.090385		1.00847	2.3889
1.00195	2.2474		0.998696	0.090136		1.00947	2.38642
1.00294	2.24413		0.999683	0.089924		1.01047	2.38376
1.00394	2.24103		1.00067	0.089696		1.01147	2.382
1.00493	2.23747		1.00165	0.090831		1.01246	2.37925
1.00591	2.23503		1.00264	0.091031		1.01346	2.37687
1.0069	2.23264		1.00363	0.091029		1.01446	2.37453
1.00789	2.22957		1.00462	0.090949		1.01545	2.37266
1.00889	2.22687		1.0056	0.090292		1.01645	2.37008
1.00988	2.22443		1.00659	0.090357		1.01745	2.36779
1.01086	2.2213		1.00757	0.089685		1.01845	2.36505
1.01185	2.21827		1.00856	0.089683		1.01944	2.36308
1.01284	2.21648		1.00955	0.090279		1.02044	2.36014
1.01384	2.21345		1.01053	0.091267		1.02144	2.3566
1.01483	2.21086		1.01152	0.092355		1.02244	2.35424
1.01581	2.20875		1.01251	0.092685		1.02343	2.35161
1.0168	2.20616		1.01349	0.093117		1.02443	2.35048
1.01779	2.20344		1.01448	0.093323		1.02543	2.3481
1.01878	2.20031		1.01547	0.092467		1.02642	2.34754
1.01977	2.19738		1.01645	0.093223		1.02742	2.34683
1.02076	2.19502		1.01744	0.093838		1.02842	2.3445
1.02175	2.19177		1.01842	0.09434		1.02942	2.34302
1.02274	2.18994		1.01941	0.095295		1.03041	2.34276
1.02373	2.18774		1.0204	0.09533		1.03141	2.34113
1.02472	2.18535		1.02138	0.095185		1.03241	2.34013
1.02571	2.18303		1.02237	0.095243		1.03341	2.33856
1.0267	2.18141		1.02336	0.094701		1.0344	2.33761
1.02769	2.18028		1.02434	0.095424		1.0354	2.33649
1.02868	2.17852		1.02533	0.0965		1.0364	2.33574
1.02967	2.17639		1.02632	0.097927		1.0374	2.33468
1.03066	2.17436		1.0273	0.099094		1.03839	2.3344
1.03165	2.17263		1.02829	0.099617		1.03939	2.33416
1.03264	2.17161		1.02927	0.100925		1.04039	2.33419
1.03363	2.17091		1.03026	0.102594		1.04139	2.33454
1.03462	2.17025		1.03125	0.104489		1.04238	2.33456
1.03561	2.16979		1.03223	0.106493		1.04338	2.33429
1.0366	2.16925		1.03322	0.107017		1.04438	2.33424
1.03759	2.1687		1.03421	0.108091		1.04537	2.33521
1.03858	2.16828		1.03519	0.109805		1.04637	2.33567
1.03957	2.16843		1.03618	0.112001		1.04737	2.33632
1.04056	2.16926		1.03717	0.114532		1.04837	2.33685
1.04155	2.1693		1.03815	0.117368		1.04936	2.33723
1.04254	2.16854		1.03914	0.120728		1.05036	2.3382
1.04353	2.16791		1.04012	0.123921		1.05136	2.33906
1.04452	2.16832		1.04111	0.127374		1.05236	2.3397
1.04551	2.16904		1.0421	0.130303		1.05335	2.34017
1.0465	2.16946		1.04308	0.133807		1.05435	2.3409
1.04749	2.17061		1.04407	0.137865		1.05535	2.3408
1.04848	2.17238		1.04506	0.141471		1.05635	2.34116
1.04947	2.17407		1.04604	0.143932		1.05734	2.34213
1.05046	2.17529		1.04703	0.146869		1.05834	2.34285
1.05145	2.17626		1.04802	0.150522		1.05934	2.34235
1.05244	2.1775		1.049	0.153897		1.06034	2.34223
1.05343	2.17916		1.04999	0.158595		1.06133	2.34266
1.05442	2.18138		1.05098	0.162829		1.06233	2.3436
1.05541	2.1831		1.05196	0.166242		1.06333	2.34331
1.0564	2.18402		1.05295	0.17045		1.06432	2.34298
1.05739	2.18469		1.05394	0.174518		1.06532	2.34263
1.05838	2.18581		1.05492	0.178322		1.06632	2.34235
1.05937	2.18721		1.05591	0.181522		1.06732	2.34227
1.06036	2.18845		1.05689	0.18528		1.06831	2.34176
1.06135	2.18933		1.05788	0.189299		1.06931	2.341
1.06234	2.18973		1.05887	0.193048		1.07031	2.34154
1.06333	2.19058		1.05985	0.197399		1.07131	2.3411
1.06432	2.19189		1.06084	0.201616		1.0723	2.34054
1.06531	2.19244		1.06183	0.205576		1.0733	2.34013
1.0663	2.19255		1.06281	0.209485		1.0743	2.3393
1.06729	2.19328		1.0638	0.212673		1.07529	2.33834
1.06828	2.1942		1.06479	0.215846		1.07629	2.3371
1.06927	2.19512		1.06577	0.219727		1.07729	2.33655
1.07026	2.19578		1.06676	0.223049		1.07829	2.33557
1.07125	2.19625		1.06774	0.226139		1.07929	2.33432
1.07224	2.19634		1.06873	0.229415		1.08028	2.33176
1.07323	2.19592		1.06972	0.232113		1.08128	2.33038
1.07422	2.19595		1.0707	0.234986		1.08228	2.32845
1.07521	2.1964		1.07169	0.238606		1.08327	2.32756
1.0762	2.19669		1.07268	0.242378		1.08427	2.32636
1.07719	2.19625		1.07366	0.245373		1.08527	2.32486
1.07818	2.19571		1.07465	0.247994		1.08627	2.32281
1.07917	2.19496		1.07564	0.250618		1.08726	2.32057
1.08016	2.19348		1.07662	0.253652		1.08826	2.31813
1.08115	2.19219		1.07761	0.255073		1.08926	2.31544
1.08214	2.19041		1.07859	0.257866		1.09026	2.3128
1.08313	2.1887		1.07958	0.260139		1.09125	2.30958
1.08412	2.18612		1.08057	0.262196		1.09225	2.30577
1.08511	2.18496		1.08155	0.263545		1.09325	2.30236
1.0861	2.18377		1.08254	0.264342		1.09424	2.29882
1.08709	2.18314		1.08353	0.266677		1.09524	2.29511
1.08808	2.18102		1.08451	0.268128		1.09624	2.29178
1.08907	2.17926		1.0855	0.268917		1.09724	2.28835
1.09006	2.1758		1.08649	0.269615		1.09824	2.28495
1.09105	2.17263		1.08747	0.271127		1.09923	2.2814
1.09204	2.17037		1.08846	0.271399		1.10023	2.27756
1.09303	2.16732		1.08944	0.270885		1.10123	2.27407
1.09402	2.16458		1.09043	0.269892		1.10222	2.2697
1.09501	2.16134		1.09142	0.269138		1.10322	2.26512
1.096	2.15887		1.0924	0.268629		1.10422	2.261
1.09699	2.15595		1.09339	0.268001		1.10522	2.25737
1.09798	2.1523		1.09438	0.267391		1.10621	2.25308
1.09897	2.14874		1.09536	0.265929		1.10721	2.24829
1.09996	2.14523		1.09635	0.266497		1.10821	2.24456
1.10095	2.14078		1.09734	0.266455		1.1092	2.2407
1.10194	2.13682		1.09832	0.264538		1.1102	2.23665
1.10293	2.13366		1.09931	0.263199		1.1112	2.23291
1.10392	2.12865		1.1003	0.260741		1.1122	2.22885
1.10491	2.12497		1.10128	0.25917		1.11319	2.22522
1.1059	2.12123		1.10227	0.258049		1.11419	2.22181
1.10689	2.11688		1.10326	0.256346		1.11519	2.21793
1.10788	2.11287		1.10424	0.254304		1.11619	2.21414
1.10887	2.10822		1.10523	0.253899		1.11718	2.21043
1.10986	2.10402		1.10621	0.252382		1.11818	2.20704
1.11085	2.09982		1.1072	0.251017		1.11918	2.2033
1.11184	2.09597		1.10819	0.249428		1.12018	2.1989
1.11283	2.0922		1.10917	0.24793		1.12117	2.19571
1.11382	2.08781		1.11016	0.245415		1.12217	2.19255
1.11481	2.083		1.11115	0.243216		1.12317	2.18903
1.1158	2.07911		1.11213	0.240905		1.12417	2.18507
1.11679	2.07555		1.11312	0.238984		1.12516	2.18149
1.11778	2.0717		1.1141	0.238147		1.12616	2.17779
1.11877	2.06736		1.11509	0.236385		1.12716	2.17348
1.11976	2.06437		1.11608	0.234158		1.12816	2.16914
1.12075	2.06094		1.11706	0.232053		1.12915	2.16565
1.12174	2.05715		1.11805	0.230295		1.13015	2.16224
1.12273	2.053		1.11904	0.228289		1.13115	2.15843
1.12372	2.04921		1.12002	0.226939		1.13214	2.15463
1.12471	2.04451		1.12101	0.226393		1.13314	2.15012
1.1257	2.04008		1.122	0.224404		1.13414	2.14568
1.12669	2.03677		1.12298	0.222855		1.13514	2.14123
1.12768	2.03358		1.12397	0.221487		1.13613	2.13749
1.12867	2.0298		1.12496	0.219749		1.13713	2.13346
1.12966	2.02638		1.12594	0.217451		1.13813	2.13009
1.13065	2.02368		1.12693	0.21702		1.13913	2.12736
1.13164	2.02029		1.12792	0.216035		1.14012	2.12444
1.13263	2.01726		1.1289	0.214873		1.14112	2.12145
1.13362	2.01466		1.12989	0.213997		1.14212	2.11907
1.13461	2.01147		1.13087	0.212442		1.14312	2.1163
1.1356	2.00756		1.13186	0.211717		1.14411	2.11293
1.13659	2.00317		1.13285	0.210462		1.14511	2.11005
1.13758	1.99882		1.13383	0.209432		1.14611	2.10723
1.13857	1.99516		1.13482	0.208136		1.14711	2.10404
1.13956	1.99108		1.13581	0.206598		1.1481	2.10052
1.14055	1.98721		1.13679	0.205171		1.1491	2.09722
1.14154	1.98353		1.13778	0.204454		1.1501	2.09441
1.14253	1.98027		1.13877	0.202715		1.15109	2.09081
1.14352	1.97739		1.13975	0.201741		1.15209	2.08723
1.14451	1.97357		1.14074	0.201534		1.15309	2.0846
1.1455	1.9694		1.14173	0.200624		1.15409	2.0816
1.14649	1.96581		1.14271	0.199732		1.15508	2.07816
1.14748	1.96274		1.1437	0.198934		1.15608	2.0751
1.14847	1.95906		1.14468	0.198674		1.15708	2.07238
1.14946	1.95478		1.14567	0.197072		1.15808	2.06904
1.15045	1.95089		1.14666	0.195314		1.15907	2.06558
1.15144	1.94793		1.14764	0.195429		1.16007	2.06235
1.15243	1.94479		1.14863	0.195228		1.16107	2.05851
1.15342	1.94144		1.14962	0.194735		1.16206	2.05484
1.15441	1.93792		1.1506	0.19423		1.16306	2.05149
1.1554	1.93419		1.15159	0.192957		1.16406	2.04742
1.15639	1.9309		1.15257	0.192116		1.16506	2.04399
1.15738	1.92797		1.15356	0.191217		1.16606	2.04101
1.15837	1.92462		1.15455	0.189799		1.16705	2.03747
1.15936	1.92133		1.15553	0.189064		1.16805	2.03425
1.16035	1.91818		1.15652	0.187822		1.16905	2.03145
1.16134	1.91471		1.15751	0.186629		1.17004	2.02873
1.16233	1.91157		1.15849	0.185498		1.17104	2.02553
1.16332	1.90793		1.15948	0.18466		1.17204	2.02206
1.16431	1.90441		1.16047	0.183752		1.17304	2.01872
1.1653	1.90179		1.16145	0.183348		1.17403	2.01606
1.16629	1.89852		1.16244	0.182733		1.17503	2.01318
1.16728	1.8956		1.16342	0.182434		1.17603	2.00969
1.16827	1.89302		1.16441	0.181745		1.17702	2.00676
1.16926	1.89023		1.1654	0.180425		1.17802	2.00368
1.17025	1.8861		1.16639	0.180837		1.17902	2.00037
1.17124	1.88314		1.16737	0.180287		1.18002	1.99766
1.17223	1.88039		1.16836	0.180642		1.18101	1.9956
1.17322	1.87741		1.16934	0.180047		1.18201	1.99347
1.17421	1.8742		1.17033	0.178512		1.18301	1.99131
1.1752	1.87198		1.17132	0.178831		1.18401	1.9886
1.17619	1.8693		1.1723	0.178709		1.185	1.98606
1.17718	1.86605		1.17329	0.177278		1.186	1.98386
1.17817	1.86333		1.17428	0.176886		1.187	1.98161
1.17916	1.86066		1.17526	0.176812		1.188	1.979
1.18015	1.85758		1.17625	0.17663		1.18899	1.97581
1.18114	1.85412		1.17724	0.174914		1.18999	1.97262
1.18213	1.85172		1.17822	0.173704		1.19099	1.9692
1.18312	1.84861		1.17921	0.173164		1.19199	1.96544
1.18411	1.84546		1.18019	0.173154		1.19298	1.96207
1.1851	1.84305		1.18118	0.173069		1.19398	1.95968
1.18609	1.83995		1.18217	0.172643		1.19498	1.95703
1.18708	1.83777		1.18315	0.171568		1.19598	1.95421
1.18807	1.83518		1.18414	0.171216		1.19697	1.95164
1.18906	1.83269		1.18513	0.171493		1.19797	1.94869
1.19005	1.83188		1.18611	0.170447		1.19897	1.94577
1.19104	1.82986		1.1871	0.169611		1.19996	1.9428
1.19203	1.82695		1.18809	0.169601		1.20096	1.94032
1.19302	1.82443		1.18907	0.169869		1.20196	1.93767
1.19401	1.82161		1.19006	0.168765		1.20296	1.93493
1.195	1.81946		1.19104	0.167861		1.20395	1.93221
1.19599	1.81764		1.19203	0.167273		1.20495	1.92914
1.19698	1.81461		1.19302	0.16625		1.20595	1.92597
1.19797	1.81204		1.194	0.165133		1.20695	1.92287
1.19896	1.80956		1.19499	0.164633		1.20794	1.92012
1.19995	1.80733		1.19598	0.164115		1.20894	1.9177
1.20094	1.80507		1.19696	0.162814		1.20994	1.91558
1.20193	1.80189		1.19795	0.16198		1.21094	1.91248
1.20292	1.79807		1.19894	0.161755		1.21193	1.90971
1.20391	1.79593		1.19992	0.160863		1.21293	1.90633
1.2049	1.79351		1.20091	0.161032		1.21393	1.90357
1.20589	1.79069		1.20189	0.161181		1.21493	1.90123
1.20688	1.78814		1.20288	0.161524		1.21592	1.89869
1.20787	1.78585		1.20387	0.161562		1.21692	1.89697
1.20886	1.78291		1.20485	0.161301		1.21792	1.89458
1.20985	1.78042		1.20584	0.161043		1.21891	1.89159
1.21084	1.77833		1.20683	0.161911		1.21991	1.88863
1.21183	1.7757		1.20781	0.162294		1.22091	1.88654
1.21282	1.77358		1.2088	0.162118		1.22191	1.88433
1.21381	1.77146		1.20979	0.161944		1.2229	1.882
1.2148	1.76961		1.21077	0.162237		1.2239	1.8797
1.21579	1.76786		1.21176	0.162235		1.2249	1.87652
1.21678	1.76563		1.21274	0.161456		1.2259	1.87387
1.21777	1.76274		1.21373	0.1613		1.22689	1.87094
1.21876	1.75897		1.21472	0.162219		1.22789	1.86813
1.21975	1.75544		1.21571	0.161161		1.22889	1.86601
1.22074	1.75263		1.21669	0.161217		1.22988	1.86335
1.22173	1.7499		1.21768	0.160053		1.23088	1.86079
1.22272	1.74651		1.21866	0.159587		1.23188	1.85819
1.22371	1.7431		1.21965	0.158515		1.23288	1.85496
1.2247	1.74023		1.22064	0.156875		1.23388	1.85223
1.22569	1.73738		1.22162	0.156273		1.23487	1.84986
1.22668	1.73482		1.22261	0.156143		1.23587	1.84715
1.22767	1.732		1.2236	0.155174		1.23687	1.84439
1.22866	1.72914		1.22458	0.154707		1.23786	1.84159
1.22965	1.72708		1.22557	0.15397		1.23886	1.83915
1.23064	1.72508		1.22656	0.155175		1.23986	1.83663
1.23163	1.72217		1.22754	0.154859		1.24086	1.83438
1.23262	1.71881		1.22853	0.154807		1.24185	1.83243
1.23361	1.71671		1.22951	0.154544		1.24285	1.83061
1.2346	1.71371		1.2305	0.153703		1.24385	1.82837
1.23559	1.71151		1.23149	0.15374		1.24485	1.82545
1.23658	1.70944		1.23247	0.154217		1.24584	1.82269
1.23757	1.70683		1.23346	0.154258		1.24684	1.81981
1.23856	1.70445		1.23445	0.153417		1.24784	1.81685
1.23954	1.70117		1.23543	0.153615		1.24883	1.81481
1.24053	1.6978		1.23642	0.152228		1.24983	1.81202
1.24153	1.69512		1.23741	0.152391		1.25083	1.80914
1.24252	1.69255		1.23839	0.152074		1.25183	1.80675
1.24351	1.68977		1.23938	0.152371		1.25282	1.80413
1.24449	1.68668		1.24036	0.152147		1.25382	1.80079
1.24548	1.68347		1.24135	0.151589		1.25482	1.79859
1.24647	1.68056		1.24234	0.151519		1.25582	1.79575
1.24747	1.67795		1.24332	0.152572		1.25681	1.79292
1.24846	1.67537		1.24431	0.152933		1.25781	1.79093
1.24944	1.67257		1.2453	0.152779		1.25881	1.78878
1.25043	1.66994		1.24628	0.152772		1.25981	1.78615
1.25143	1.66733		1.24727	0.152935		1.2608	1.78396
1.25242	1.66555		1.24826	0.152857		1.2618	1.78046
1.25341	1.66387		1.24924	0.153036		1.2628	1.77793
1.25439	1.66113		1.25023	0.152468		1.2638	1.77554
1.25538	1.65868		1.25121	0.150954		1.26479	1.77345
1.25638	1.65682		1.2522	0.149515		1.26579	1.77077
1.25737	1.6545		1.25319	0.148568		1.26679	1.76713
1.25835	1.65255		1.25417	0.148329		1.26778	1.76465
1.25934	1.65016		1.25516	0.147712		1.26878	1.76293
1.26033	1.64667		1.25615	0.146494		1.26978	1.76037
1.26133	1.64371		1.25713	0.146069		1.27078	1.75802
1.26232	1.64101		1.25812	0.145801		1.27177	1.7555
1.2633	1.63827		1.25911	0.145389		1.27277	1.75308
1.26429	1.63599		1.26009	0.144177		1.27377	1.74978
1.26528	1.63296		1.26108	0.143375		1.27477	1.74697
1.26628	1.62987		1.26207	0.1433		1.27576	1.74413
1.26726	1.62685		1.26305	0.14329		1.27676	1.74106
1.26825	1.62451		1.26404	0.142973		1.27776	1.73794
1.26924	1.62303		1.26503	0.143024		1.27876	1.73558
1.27023	1.62113		1.26601	0.142263		1.27975	1.73232
1.27122	1.61891		1.267	0.142303		1.28075	1.72969
1.27221	1.61666		1.26798	0.142869		1.28175	1.72644
1.2732	1.61436		1.26897	0.143548		1.28275	1.72406
1.27419	1.61216		1.26996	0.14397		1.28374	1.72157
1.27518	1.61008		1.27094	0.143948		1.28474	1.71902
1.27617	1.60775		1.27193	0.144712		1.28574	1.71645
1.27716	1.60549		1.27292	0.145379		1.28673	1.71386
1.27815	1.60326		1.2739	0.145185		1.28773	1.71126
1.27914	1.60048		1.27489	0.145021		1.28873	1.709
1.28013	1.59733		1.27588	0.144406		1.28973	1.70629
1.28112	1.59467		1.27686	0.144484		1.29072	1.7041
1.28211	1.59243		1.27785	0.144057		1.29172	1.70132
1.2831	1.59007		1.27883	0.143361		1.29272	1.69907
1.28409	1.587		1.27982	0.143368		1.29372	1.69653
1.28508	1.58385		1.28081	0.142668		1.29471	1.69437
1.28607	1.58034		1.28179	0.142889		1.29571	1.69185
1.28706	1.57761		1.28278	0.142769		1.29671	1.68982
1.28805	1.57504		1.28377	0.14308		1.29771	1.68867
1.28904	1.57264		1.28475	0.143069		1.2987	1.68638
1.29003	1.57061		1.28574	0.143765		1.2997	1.68525
1.29102	1.56839		1.28673	0.143755		1.3007	1.68287
1.29201	1.5663		1.28771	0.143015		1.3017	1.68094
1.293	1.56388		1.2887	0.142737		1.30269	1.67838
1.29399	1.56236		1.28968	0.143461		1.30369	1.67673
1.29498	1.56036		1.29067	0.143771		1.30469	1.67467
1.29597	1.55781		1.29166	0.144419		1.30568	1.67239
1.29696	1.55585		1.29264	0.142987		1.30668	1.67023
1.29795	1.55321		1.29363	0.142317		1.30768	1.66771
1.29894	1.55152		1.29462	0.142364		1.30868	1.66541
1.29993	1.54899		1.2956	0.141659		1.30967	1.66335
1.30092	1.54704		1.29659	0.140824		1.31067	1.66089
1.30191	1.5446		1.29758	0.139867		1.31167	1.65924
1.3029	1.5419		1.29856	0.139103		1.31267	1.65861
1.30389	1.53934		1.29955	0.139268		1.31366	1.6565
1.30488	1.53685		1.30053	0.140128		1.31466	1.6547
1.30587	1.533		1.30152	0.140623		1.31566	1.65211
1.30686	1.53097		1.30251	0.140543		1.31665	1.65055
1.30785	1.52824		1.30349	0.140046		1.31765	1.64827
1.30884	1.52676		1.30448	0.140759		1.31865	1.64532
1.30983	1.52495		1.30547	0.140314		1.31965	1.64358
1.31082	1.52343		1.30645	0.139714		1.32064	1.64103
1.31181	1.52093		1.30744	0.139478		1.32164	1.63913
1.3128	1.5198		1.30843	0.139194		1.32264	1.63661
1.31379	1.51738		1.30941	0.139681		1.32364	1.63545
1.31478	1.51481		1.3104	0.140588		1.32463	1.63379
1.31577	1.5128		1.31139	0.140361		1.32563	1.6324
1.31676	1.51123		1.31237	0.14022		1.32663	1.62997
1.31775	1.50909		1.31336	0.13973		1.32763	1.62901
1.31874	1.50645		1.31435	0.139026		1.32862	1.62662
1.31973	1.5049		1.31533	0.139143		1.32962	1.62527
1.32072	1.502		1.31632	0.138775		1.33062	1.62293
1.32171	1.4999		1.3173	0.138064		1.33161	1.62051
1.3227	1.49871		1.31829	0.137297		1.33261	1.6186
1.32369	1.49706		1.31928	0.136302		1.33361	1.61588
1.32468	1.49495		1.32026	0.135703		1.33461	1.61373
1.32567	1.49292		1.32125	0.135491		1.3356	1.61108
1.32666	1.49022		1.32224	0.13488		1.3366	1.60851
1.32765	1.48817		1.32322	0.135021		1.3376	1.60619
1.32864	1.48643		1.32421	0.133955		1.3386	1.60418
1.32963	1.48468		1.32519	0.132906		1.33959	1.6011
1.33062	1.48267		1.32618	0.133461		1.34059	1.59868
1.33161	1.48099		1.32717	0.133145		1.34159	1.59716
1.3326	1.47853		1.32815	0.13337		1.34259	1.59399
1.33359	1.47584		1.32914	0.133756		1.34358	1.59162
1.33458	1.47515		1.33013	0.133567		1.34458	1.58977
1.33557	1.47365		1.33111	0.132394		1.34558	1.58832
1.33656	1.47175		1.3321	0.131969		1.34658	1.58643
1.33755	1.46903		1.33309	0.131422		1.34757	1.5831
1.33854	1.46718		1.33407	0.131614		1.34857	1.58062
1.33953	1.46443		1.33506	0.131005		1.34957	1.57808
1.34052	1.46279		1.33605	0.131108		1.35057	1.57672
1.34151	1.46019		1.33703	0.13132		1.35156	1.5749
1.3425	1.45798		1.33802	0.131037		1.35256	1.57302
1.34349	1.4561		1.33901	0.130251		1.35356	1.57044
1.34448	1.45363		1.33999	0.129541		1.35455	1.56682
1.34547	1.4517		1.34098	0.128899		1.35555	1.56489
1.34646	1.44951		1.34196	0.129159		1.35655	1.56306
1.34745	1.44798		1.34295	0.128666		1.35755	1.56043
1.34844	1.44634		1.34394	0.12867		1.35854	1.55748
1.34943	1.4442		1.34492	0.129236		1.35954	1.55471
1.35042	1.44185		1.34591	0.129621		1.36054	1.55305
1.35141	1.43952		1.3469	0.129706		1.36154	1.55148
1.3524	1.43766		1.34788	0.129997		1.36253	1.54826
1.35339	1.43593		1.34887	0.129975		1.36353	1.54647
1.35438	1.43437		1.34986	0.130112		1.36453	1.54288
1.35537	1.43258		1.35084	0.130984		1.36553	1.54088
1.35636	1.4306		1.35183	0.130469		1.36652	1.5383
1.35735	1.42876		1.35282	0.130646		1.36752	1.5358
1.35834	1.42612		1.3538	0.130448		1.36852	1.53329
1.35933	1.42349		1.35479	0.13045		1.36952	1.5312
1.36032	1.42152		1.35577	0.130668		1.37051	1.52932
1.36131	1.41962		1.35676	0.130757		1.37151	1.52661
1.3623	1.41772		1.35775	0.131222		1.37251	1.52447
1.36329	1.41563		1.35873	0.131088		1.3735	1.52198
1.36428	1.41334		1.35972	0.130485		1.3745	1.51982
1.36527	1.41145		1.36071	0.130155		1.3755	1.51781
1.36626	1.40907		1.36169	0.129832		1.3765	1.51702
1.36725	1.40723		1.36268	0.130076		1.37749	1.51489
1.36824	1.40528		1.36366	0.131026		1.37849	1.51252
1.36923	1.40301		1.36465	0.130844		1.37949	1.51011
1.37022	1.4009		1.36564	0.130767		1.38048	1.50752
1.37121	1.3986		1.36662	0.13145		1.38148	1.50541
1.3722	1.39651		1.36761	0.131494		1.38248	1.50362
1.37319	1.39448		1.3686	0.131824		1.38348	1.50252
1.37418	1.39191		1.36958	0.132909		1.38447	1.49988
1.37517	1.38981		1.37057	0.132524		1.38547	1.49771
1.37616	1.38816		1.37156	0.132746		1.38647	1.4962
1.37715	1.38579		1.37254	0.132591		1.38747	1.49411
1.37814	1.38258		1.37353	0.133342		1.38846	1.49132
1.37913	1.37938		1.37452	0.134193		1.38946	1.49023
1.38012	1.3768		1.3755	0.134027		1.39046	1.48772
1.38111	1.3743		1.37649	0.134152		1.39146	1.48469
1.3821	1.37216		1.37748	0.134379		1.39245	1.48365
1.38309	1.37085		1.37846	0.134194		1.39345	1.48137
1.38408	1.36877		1.37945	0.135409		1.39445	1.47929
1.38507	1.36647		1.38043	0.135703		1.39545	1.47737
1.38606	1.36473		1.38142	0.135461		1.39644	1.47509
1.38705	1.36281		1.38241	0.136009		1.39744	1.47344
1.38804	1.36061		1.38339	0.135533		1.39844	1.47141
1.38903	1.35853		1.38438	0.13655		1.39943	1.46889
1.39002	1.35651		1.38537	0.136607		1.40043	1.46489
1.39101	1.35424		1.38635	0.13611		1.40143	1.46267
1.392	1.35226		1.38734	0.135924		1.40243	1.46139
1.39299	1.35016		1.38833	0.136029		1.40342	1.45951
1.39398	1.34816		1.38931	0.136256		1.40442	1.45891
1.39497	1.34617		1.3903	0.136619		1.40542	1.45702
1.39596	1.34424		1.39128	0.136789		1.40642	1.45443
1.39695	1.34165		1.39227	0.137175		1.40741	1.45247
1.39794	1.33909		1.39326	0.137614		1.40841	1.45068
1.39893	1.33712		1.39424	0.13776		1.40941	1.44842
1.39992	1.33549		1.39523	0.137525		1.41041	1.4464
1.40091	1.33407		1.39622	0.138518		1.4114	1.44384
1.4019	1.33203		1.3972	0.138594		1.4124	1.44131
1.40289	1.3291		1.39819	0.139113		1.4134	1.43908
1.40388	1.32644		1.39918	0.138227		1.4144	1.43742
1.40487	1.32445		1.40016	0.137426		1.41539	1.43508
1.40586	1.32279		1.40115	0.138224		1.41639	1.43254
1.40685	1.32006		1.40213	0.137769		1.41739	1.43003
1.40784	1.31723		1.40312	0.13821		1.41839	1.42721
1.40883	1.31527		1.40411	0.138385		1.41938	1.42464
1.40982	1.31341		1.40509	0.138833		1.42038	1.42174
1.41081	1.31113		1.40608	0.138996		1.42138	1.4196
1.4118	1.30854		1.40707	0.138757		1.42237	1.41694
1.41279	1.30584		1.40805	0.138617		1.42337	1.41433
1.41378	1.30373		1.40904	0.13824		1.42437	1.41165
1.41477	1.30171		1.41003	0.138474		1.42537	1.40953
1.41576	1.29878		1.41101	0.139118		1.42636	1.4071
1.41675	1.2963		1.412	0.138968		1.42736	1.40456
1.41774	1.29414		1.41298	0.13894		1.42836	1.4021
1.41873	1.29244		1.41397	0.139641		1.42936	1.3999
1.41972	1.29012		1.41496	0.139535		1.43035	1.39762
1.42071	1.28799		1.41594	0.139079		1.43135	1.39621
1.4217	1.28559		1.41693	0.139928		1.43235	1.39416
1.42269	1.2834		1.41792	0.139691		1.43335	1.39174
1.42368	1.28168		1.4189	0.138708		1.43434	1.38996
1.42467	1.27943		1.41989	0.139009		1.43534	1.38799
1.42566	1.27662		1.42088	0.139691		1.43634	1.38517
1.42665	1.27478		1.42186	0.139364		1.43734	1.38259
1.42764	1.27342		1.42285	0.139553		1.43833	1.38035
1.42863	1.27264		1.42384	0.139898		1.43933	1.37862
1.42962	1.27156		1.42482	0.139248		1.44033	1.37645
1.43061	1.27011		1.42581	0.139118		1.44132	1.37435
1.4316	1.26855		1.4268	0.138247		1.44232	1.37184
1.43259	1.26569		1.42778	0.137854		1.44332	1.36933
1.43358	1.26334		1.42877	0.137527		1.44432	1.36723
1.43457	1.26139		1.42975	0.138257		1.44531	1.36432
1.43556	1.25943		1.43074	0.137735		1.44631	1.3615
1.43655	1.25746		1.43173	0.137625		1.44731	1.35894
1.43754	1.2558		1.43271	0.137877		1.4483	1.3556
1.43853	1.25341		1.4337	0.137538		1.4493	1.35288
1.43952	1.25182		1.43469	0.137716		1.4503	1.35159
1.44051	1.24972		1.43567	0.137756		1.4513	1.34898
1.4415	1.24788		1.43666	0.138211		1.45229	1.34546
1.44249	1.24565		1.43765	0.138794		1.45329	1.3424
1.44348	1.24355		1.43863	0.139507		1.45429	1.33985
1.44447	1.24204		1.43962	0.140185		1.45529	1.33791
1.44546	1.23936		1.4406	0.140579		1.45628	1.33683
1.44645	1.23677		1.44159	0.140288		1.45728	1.33471
1.44744	1.23498		1.44258	0.139915		1.45828	1.33311
1.44843	1.23286		1.44356	0.139752		1.45928	1.33143
1.44942	1.23072		1.44455	0.139656		1.46027	1.32912
1.45041	1.22857		1.44554	0.139511		1.46127	1.32698
1.4514	1.22625		1.44652	0.138961		1.46227	1.32494
1.45239	1.22449		1.44751	0.138502		1.46327	1.32298
1.45338	1.22343		1.4485	0.138874		1.46426	1.32146
1.45437	1.22172		1.44948	0.139112		1.46526	1.31997
1.45536	1.21988		1.45047	0.139364		1.46626	1.31871
1.45635	1.21728		1.45145	0.139366		1.46725	1.31775
1.45734	1.21615		1.45244	0.139467		1.46825	1.31629
1.45833	1.21494		1.45343	0.139686		1.46925	1.31433
1.45932	1.2127		1.45441	0.139436		1.47025	1.31286
1.46031	1.21042		1.4554	0.139305		1.47124	1.31082
1.4613	1.20895		1.45639	0.139495		1.47224	1.30858
1.46229	1.207		1.45737	0.139605		1.47324	1.30709
1.46328	1.20537		1.45836	0.139135		1.47424	1.30535
1.46427	1.20273		1.45935	0.139274		1.47523	1.30278
1.46526	1.20107		1.46033	0.139288		1.47623	1.29994
1.46625	1.19944		1.46132	0.139684		1.47723	1.29789
1.46724	1.1973		1.4623	0.13989		1.47823	1.29592
1.46823	1.19483		1.46329	0.138777		1.47922	1.29377
1.46922	1.19328		1.46428	0.138824		1.48022	1.29201
1.47021	1.19235		1.46526	0.139307		1.48122	1.28951
1.4712	1.19075		1.46625	0.139829		1.48222	1.28766
1.47219	1.18822		1.46724	0.140408		1.48321	1.28575
1.47318	1.18656		1.46822	0.141328		1.48421	1.28327
1.47417	1.1852		1.46921	0.14148		1.48521	1.2808
1.47516	1.18375		1.4702	0.141096		1.4862	1.2783
1.47615	1.18163		1.47118	0.141974		1.4872	1.27619
1.47714	1.17845		1.47217	0.141433		1.4882	1.27391
1.47813	1.1764		1.47316	0.140704		1.4892	1.27133
1.47912	1.17495		1.47414	0.140642		1.49019	1.26937
1.48011	1.17262		1.47513	0.140811		1.49119	1.26785
1.4811	1.17012		1.47612	0.140454		1.49219	1.26602
1.48209	1.16945		1.4771	0.14042		1.49319	1.26461
1.48308	1.16774		1.47809	0.140895		1.49418	1.26213
1.48407	1.16558		1.47907	0.140472		1.49518	1.25983
1.48506	1.16319		1.48006	0.140381		1.49618	1.25795
1.48605	1.16076		1.48105	0.140502		1.49718	1.256
1.48704	1.15826		1.48203	0.140228		1.49817	1.25499
1.48803	1.15607		1.48302	0.139958		1.49917	1.25323
1.48901	1.15491		1.48401	0.138873		1.50017	1.25039
1.49001	1.15257		1.48499	0.1388		1.50117	1.24789
1.491	1.15065		1.48598	0.138437		1.50216	1.24585
1.49198	1.14881		1.48697	0.13811		1.50316	1.24471
1.49297	1.14646		1.48795	0.13767		1.50416	1.24321
1.49396	1.14407		1.48894	0.136559		1.50516	1.24064
1.49496	1.14252		1.48992	0.135906		1.50615	1.23839
1.49595	1.14048		1.49091	0.136112		1.50715	1.2365
1.49693	1.1377		1.4919	0.136534		1.50815	1.23385
1.49792	1.13544		1.49288	0.136779		1.50914	1.23164
1.49891	1.13416		1.49387	0.135924		1.51014	1.22965
1.49991	1.13161		1.49486	0.135315		1.51114	1.22751
1.5009	1.12974		1.49584	0.135679		1.51214	1.22579
1.50188	1.12822		1.49683	0.135867		1.51313	1.22392
1.50287	1.1259		1.49782	0.136352		1.51413	1.22185
1.50387	1.12363		1.4988	0.137162		1.51513	1.21984
1.50486	1.12089		1.49979	0.138085		1.51613	1.21759
1.50585	1.11896		1.50077	0.138439		1.51712	1.21494
1.50683	1.11742		1.50176	0.13798		1.51812	1.21237
1.50782	1.11518		1.50275	0.138315		1.51912	1.21023
1.50882	1.11269		1.50373	0.138431		1.52012	1.20764
1.50981	1.11043		1.50472	0.138263		1.52111	1.20536
1.5108	1.10823		1.50571	0.138063		1.52211	1.20384
1.51178	1.10484		1.50669	0.138009		1.52311	1.20178
1.51277	1.10219		1.50768	0.139116		1.5241	1.19981
1.51377	1.10039		1.50867	0.139244		1.5251	1.19811
1.51475	1.0989		1.50965	0.139145		1.5261	1.19612
1.51574	1.09741		1.51064	0.138962		1.5271	1.19388
1.51673	1.09623		1.51162	0.138946		1.52809	1.19199
1.51772	1.09433		1.51261	0.13928		1.52909	1.19021
1.51871	1.09205		1.5136	0.138986		1.53009	1.18772
1.5197	1.08869		1.51459	0.138922		1.53109	1.18521
1.52069	1.08574		1.51557	0.138691		1.53208	1.1826
1.52168	1.08348		1.51656	0.138635		1.53308	1.17971
1.52267	1.08083		1.51754	0.138906		1.53408	1.1779
1.52366	1.07809		1.51853	0.138725		1.53507	1.17666
1.52465	1.07584		1.51952	0.138223		1.53607	1.1754
1.52564	1.07396		1.5205	0.138377		1.53707	1.17407
1.52663	1.0726		1.52149	0.138874		1.53807	1.17274
1.52762	1.07065		1.52248	0.139309		1.53906	1.17132
1.52861	1.06788		1.52346	0.139921		1.54006	1.16949
1.5296	1.06552		1.52445	0.140873		1.54106	1.16696
1.53059	1.06319		1.52544	0.142192		1.54206	1.16422
1.53158	1.06075		1.52642	0.142196		1.54305	1.1615
1.53257	1.05837		1.52741	0.141742		1.54405	1.1592
1.53356	1.05614		1.52839	0.141883		1.54505	1.15718
1.53455	1.05478		1.52938	0.142207		1.54605	1.15539
1.53554	1.05295		1.53037	0.142306		1.54704	1.15393
1.53653	1.05101		1.53135	0.142738		1.54804	1.15208
1.53752	1.04982		1.53234	0.143426		1.54904	1.15071
1.53851	1.04758		1.53333	0.144206		1.55004	1.1497
1.5395	1.04533		1.53431	0.144328		1.55103	1.1481
1.54049	1.04353		1.5353	0.144097		1.55203	1.14623
1.54148	1.04159		1.53628	0.143915		1.55303	1.14376
1.54247	1.03968		1.53727	0.1441		1.55402	1.14084
1.54346	1.03755		1.53826	0.144603		1.55502	1.13862
1.54445	1.03515		1.53924	0.144786		1.55602	1.13652
1.54544	1.03326		1.54023	0.144833		1.55702	1.13385
1.54643	1.03184		1.54122	0.144699		1.55801	1.13145
1.54742	1.02995		1.5422	0.145677		1.55901	1.12916
1.54841	1.02716		1.54319	0.146676		1.56001	1.12701
1.5494	1.02479		1.54418	0.146977		1.56101	1.12517
1.55039	1.02222		1.54516	0.147299		1.562	1.12294
1.55138	1.01965		1.54615	0.147453		1.563	1.11997
1.55237	1.01733		1.54714	0.147155		1.564	1.11675
1.55336	1.01498		1.54812	0.146172		1.565	1.11428
1.55435	1.01301		1.54911	0.145607		1.56599	1.11226
1.55534	1.01087		1.5501	0.145845		1.56699	1.11012
1.55633	1.00847		1.55108	0.145659		1.56799	1.10823
1.55732	1.00642		1.55207	0.146141		1.56899	1.10638
1.55831	1.00501		1.55305	0.146373		1.56998	1.1041
1.5593	1.00352		1.55404	0.146591		1.57098	1.10176
1.56029	1.00158		1.55503	0.147248		1.57198	1.09861
1.56128	1.00003		1.55601	0.147258		1.57298	1.09573
1.56227	0.998826		1.557	0.14709		1.57397	1.09276
1.56326	0.996654		1.55799	0.147015		1.57497	1.09024
1.56425	0.994283		1.55897	0.147184		1.57597	1.0883
1.56524	0.991575		1.55996	0.147081		1.57696	1.08644
1.56623	0.98868		1.56095	0.147359		1.57796	1.08426
1.56722	0.986102		1.56193	0.148357		1.57896	1.08195
1.56821	0.984367		1.56292	0.149135		1.57996	1.07988
1.5692	0.982893		1.56391	0.149097		1.58095	1.07776
1.57019	0.981729		1.56489	0.148764		1.58195	1.07534
1.57118	0.980137		1.56588	0.14836		1.58295	1.07322
1.57217	0.978551		1.56686	0.147829		1.58395	1.07064
1.57316	0.977303		1.56785	0.147805		1.58494	1.06716
1.57415	0.975673		1.56884	0.147189		1.58594	1.06441
1.57514	0.973728		1.56982	0.146731		1.58694	1.06196
1.57613	0.971807		1.57081	0.14684		1.58794	1.05963
1.57712	0.970246		1.5718	0.146904		1.58893	1.05707
1.57811	0.968656		1.57278	0.146352		1.58993	1.05448
1.5791	0.966887		1.57377	0.145581		1.59093	1.05271
1.58009	0.964967		1.57475	0.145367		1.59192	1.05158
1.58108	0.962815		1.57574	0.14537		1.59292	1.04953
1.58207	0.960881		1.57673	0.145393		1.59392	1.0476
1.58306	0.959295		1.57771	0.145676		1.59492	1.04541
1.58405	0.956892		1.5787	0.146098		1.59591	1.04299
1.58504	0.953951		1.57969	0.146185		1.59691	1.0409
1.58603	0.952273		1.58067	0.146445		1.59791	1.0391
1.58702	0.949985		1.58166	0.146554		1.59891	1.03649
1.58801	0.947266		1.58265	0.146349		1.5999	1.03406
1.589	0.945434		1.58363	0.146879		1.6009	1.03197
1.58999	0.943173		1.58462	0.147529		1.6019	1.02991
1.59098	0.94126		1.5856	0.148069		1.60289	1.02788
1.59197	0.939389		1.58659	0.14843		1.60389	1.02565
1.59296	0.937539		1.58758	0.148718		1.60489	1.02369
1.59395	0.936367		1.58857	0.149556		1.60589	1.02195
1.59494	0.935481		1.58955	0.149852		1.60688	1.02036
1.59593	0.933422		1.59054	0.149199		1.60788	1.01854
1.59692	0.931594		1.59152	0.148273		1.60888	1.01623
1.59791	0.930358		1.59251	0.147953		1.60988	1.0137
1.5989	0.929216		1.5935	0.147583		1.61087	1.01134
1.59989	0.928051		1.59448	0.147313		1.61187	1.00884
1.60088	0.926468		1.59547	0.146747		1.61287	1.00674
1.60187	0.924612		1.59646	0.146523		1.61387	1.00484
1.60286	0.922893		1.59744	0.146738		1.61486	1.00229
1.60385	0.921245		1.59843	0.146877		1.61586	0.999688
1.60484	0.919726		1.59942	0.146762		1.61686	0.997587
1.60583	0.918484		1.6004	0.146627		1.61786	0.995748
1.60682	0.916804		1.60139	0.14615		1.61885	0.993517
1.60781	0.914719		1.60237	0.146494		1.61985	0.991935
1.6088	0.912838		1.60336	0.146883		1.62085	0.990216
1.60979	0.911317		1.60435	0.146993		1.62184	0.988334
1.61078	0.909528		1.60533	0.14752		1.62284	0.986217
1.61177	0.908067		1.60632	0.147486		1.62384	0.984147
1.61276	0.906732		1.60731	0.147661		1.62484	0.982348
1.61375	0.904946		1.60829	0.147762		1.62583	0.979781
1.61474	0.90265		1.60928	0.148182		1.62683	0.977806
1.61573	0.900729		1.61027	0.148255		1.62783	0.976451
1.61672	0.898767		1.61125	0.148127		1.62883	0.973928
1.61771	0.895874		1.61224	0.147694		1.62982	0.971773
1.6187	0.893573		1.61322	0.147846		1.63082	0.970301
1.61969	0.891225		1.61421	0.148045		1.63182	0.969077
1.62068	0.889356		1.6152	0.148248		1.63282	0.967527
1.62167	0.886887		1.61618	0.148386		1.63381	0.965743
1.62266	0.884245		1.61717	0.148154		1.63481	0.964326
1.62365	0.881927		1.61816	0.148515		1.63581	0.962297
1.62464	0.880101		1.61914	0.148581		1.63681	0.96017
1.62563	0.877549		1.62013	0.149105		1.6378	0.958062
1.62662	0.874619		1.62112	0.14946		1.6388	0.955763
1.62761	0.872396		1.6221	0.150084		1.6398	0.953979
1.6286	0.869295		1.62309	0.149861		1.6408	0.95184
1.62959	0.866893		1.62407	0.149326		1.64179	0.949224
1.63058	0.865215		1.62506	0.148998		1.64279	0.947561
1.63157	0.863373		1.62605	0.14926		1.64379	0.945374
1.63256	0.860842		1.62703	0.149621		1.64478	0.943751
1.63355	0.858554		1.62802	0.150235		1.64578	0.942334
1.63454	0.857111		1.62901	0.150133		1.64678	0.940134
1.63553	0.855066		1.62999	0.149298		1.64778	0.937197
1.63652	0.853299		1.63098	0.149161		1.64877	0.935453
1.63751	0.852121		1.63197	0.149501		1.64977	0.933642
1.6385	0.849989		1.63295	0.149745		1.65077	0.931146
1.63949	0.848609		1.63394	0.14986		1.65177	0.9285
1.64048	0.846631		1.63493	0.149797		1.65276	0.926458
1.64147	0.844768		1.63591	0.149533		1.65376	0.924624
1.64246	0.842406		1.6369	0.149338		1.65476	0.922847
1.64345	0.840191		1.63789	0.149348		1.65576	0.921389
1.64444	0.83643		1.63887	0.149295		1.65675	0.918832
1.64543	0.834599		1.63986	0.151006		1.65775	0.916635
1.64642	0.832624		1.64084	0.152029		1.65875	0.91503
1.64741	0.830219		1.64183	0.152971		1.65974	0.913695
1.6484	0.827459		1.64282	0.153988		1.66074	0.912092
1.64939	0.823904		1.6438	0.153935		1.66174	0.910162
1.65038	0.82243		1.64479	0.154502		1.66274	0.90884
1.65137	0.819853		1.64578	0.153964		1.66373	0.907282
1.65236	0.818148		1.64676	0.153924		1.66473	0.906281
1.65335	0.815278		1.64775	0.154389		1.66573	0.904748
1.65434	0.813072		1.64874	0.155117		1.66673	0.90281
1.65533	0.809684		1.64972	0.156357		1.66772	0.900339
1.65632	0.806571		1.65071	0.156063		1.66872	0.898146
1.65731	0.804058		1.65169	0.155941		1.66972	0.895586
1.6583	0.801842		1.65268	0.155734		1.67071	0.894105
1.65929	0.799605		1.65367	0.155436		1.67171	0.893047
1.66028	0.797164		1.65465	0.155236		1.67271	0.891716
1.66127	0.795827		1.65564	0.154673		1.67371	0.890262
1.66226	0.79379		1.65663	0.154134		1.67471	0.887877
1.66325	0.791566		1.65761	0.153688		1.6757	0.886285
1.66424	0.789511		1.6586	0.153222		1.6767	0.884539
1.66523	0.787962		1.65959	0.152762		1.6777	0.881706
1.66622	0.786801		1.66057	0.152948		1.67869	0.879745
1.66721	0.785368		1.66156	0.153628		1.67969	0.87779
1.6682	0.7838		1.66254	0.153694		1.68069	0.875805
1.66919	0.7823		1.66353	0.154076		1.68169	0.873294
1.67018	0.780567		1.66452	0.154755		1.68268	0.871266
1.67117	0.779096		1.6655	0.155277		1.68368	0.869285
1.67216	0.777501		1.66649	0.156335		1.68468	0.867387
1.67315	0.775206		1.66748	0.157386		1.68568	0.866204
1.67414	0.772791		1.66846	0.157401		1.68667	0.864275
1.67513	0.770833		1.66945	0.156964		1.68767	0.862185
1.67612	0.769365		1.67044	0.156872		1.68867	0.860007
1.67711	0.767429		1.67142	0.156475		1.68966	0.85827
1.6781	0.765776		1.67241	0.157281		1.69066	0.856604
1.67909	0.764315		1.67339	0.157511		1.69166	0.854623
1.68008	0.762682		1.67438	0.157879		1.69266	0.852175
1.68107	0.76018		1.67537	0.157968		1.69365	0.850526
1.68206	0.75831		1.67635	0.157467		1.69465	0.847489
1.68305	0.756365		1.67734	0.156485		1.69565	0.845813
1.68404	0.754575		1.67833	0.157004		1.69665	0.843783
1.68503	0.753202		1.67931	0.157545		1.69764	0.841755
1.68602	0.750001		1.6803	0.158366		1.69864	0.839966
1.68701	0.747841		1.68129	0.158262		1.69964	0.838031
1.688	0.745154		1.68227	0.157549		1.70064	0.836188
1.68899	0.742922		1.68326	0.157616		1.70163	0.835417
1.68998	0.740878		1.68425	0.157748		1.70263	0.833805
1.69097	0.738555		1.68523	0.158018		1.70363	0.832236
1.69196	0.736898		1.68622	0.15839		1.70463	0.830618
1.69295	0.73476		1.68721	0.158929		1.70562	0.827437
1.69394	0.733427		1.68819	0.15985		1.70662	0.825076
1.69493	0.731223		1.68918	0.15913		1.70762	0.823861
1.69592	0.729028		1.69016	0.159095		1.70861	0.821973
1.69691	0.726363		1.69115	0.158465		1.70961	0.81938
1.6979	0.724349		1.69214	0.157685		1.71061	0.818215
1.69889	0.722838		1.69312	0.157863		1.71161	0.816956
1.69988	0.720945		1.69411	0.157378		1.7126	0.815403
1.70087	0.718934		1.6951	0.157631		1.7136	0.813185
1.70186	0.716513		1.69608	0.157648		1.7146	0.811367
1.70285	0.715061		1.69707	0.157366		1.7156	0.810155
1.70384	0.713341		1.69806	0.157344		1.71659	0.809068
1.70483	0.712676		1.69904	0.156139		1.71759	0.807418
1.70582	0.71124		1.70003	0.155624		1.71859	0.806021
1.70681	0.709331		1.70101	0.155092		1.71959	0.804754
1.7078	0.707789		1.702	0.155148		1.72058	0.801861
1.70879	0.705343		1.70299	0.15511		1.72158	0.799095
1.70978	0.703542		1.70397	0.155414		1.72258	0.797413
1.71077	0.701414		1.70496	0.155714		1.72358	0.795764
1.71176	0.69944		1.70595	0.156332		1.72457	0.794082
1.71275	0.697396		1.70693	0.156437		1.72557	0.793645
1.71374	0.696023		1.70792	0.15671		1.72657	0.792055
1.71473	0.693656		1.70891	0.156607		1.72756	0.790533
1.71572	0.69135		1.70989	0.155958		1.72856	0.789043
1.71671	0.690106		1.71088	0.155279		1.72956	0.787246
1.7177	0.687173		1.71186	0.155298		1.73056	0.785552
1.71869	0.684895		1.71285	0.155362		1.73155	0.784241
1.71968	0.683185		1.71384	0.155205		1.73255	0.782753
1.72067	0.681993		1.71482	0.15478		1.73355	0.780865
1.72166	0.679681		1.71581	0.154258		1.73455	0.778828
1.72265	0.678516		1.7168	0.152989		1.73554	0.776676
1.72364	0.677495		1.71778	0.153548		1.73654	0.775367
1.72463	0.67643		1.71877	0.152536		1.73754	0.773756
1.72562	0.674782		1.71976	0.152502		1.73853	0.771971
1.72661	0.672436		1.72074	0.152787		1.73953	0.769618
1.7276	0.671064		1.72173	0.152119		1.74053	0.767694
1.72859	0.669046		1.72271	0.152208		1.74153	0.765935
1.72958	0.666872		1.7237	0.151774		1.74253	0.765167
1.73057	0.665709		1.72469	0.151276		1.74352	0.763426
1.73156	0.664699		1.72568	0.15174		1.74452	0.76269
1.73255	0.663094		1.72666	0.15221		1.74552	0.760096
1.73354	0.661576		1.72765	0.151444		1.74651	0.758289
1.73453	0.65984		1.72863	0.151157		1.74751	0.757077
1.73552	0.659043		1.72962	0.150635		1.74851	0.754907
1.73651	0.657476		1.73061	0.150816		1.74951	0.752811
1.7375	0.655797		1.73159	0.151464		1.7505	0.751533
1.73849	0.653693		1.73258	0.151051		1.7515	0.749407
1.73948	0.651375		1.73357	0.150653		1.7525	0.747507
1.74047	0.649591		1.73455	0.150538		1.7535	0.745091
1.74145	0.648147		1.73554	0.149554		1.75449	0.742569
1.74245	0.646824		1.73653	0.148718		1.75549	0.74137
1.74344	0.645076		1.73751	0.148233		1.75649	0.740452
1.74442	0.643062		1.7385	0.147677		1.75748	0.73863
1.74541	0.640614		1.73948	0.147208		1.75848	0.736784
1.7464	0.639527		1.74047	0.147276		1.75948	0.736253
1.7474	0.637781		1.74146	0.14722		1.76048	0.733228
1.74839	0.635942		1.74244	0.148035		1.76147	0.731446
1.74937	0.63414		1.74343	0.148772		1.76247	0.72975
1.75036	0.632815		1.74442	0.148541		1.76347	0.729045
1.75135	0.631625		1.7454	0.148469		1.76447	0.72726
1.75235	0.629526		1.74639	0.148194		1.76546	0.725031
1.75334	0.627657		1.74737	0.148477		1.76646	0.722657
1.75432	0.62587		1.74836	0.14901		1.76746	0.720261
1.75531	0.624062		1.74935	0.149593		1.76846	0.718544
1.75631	0.622759		1.75033	0.150025		1.76945	0.717715
1.7573	0.621136		1.75132	0.150676		1.77045	0.716226
1.75829	0.6195		1.75231	0.151266		1.77145	0.714707
1.75927	0.617788		1.75329	0.15157		1.77245	0.712306
1.76026	0.615185		1.75428	0.152035		1.77344	0.709589
1.76126	0.612784		1.75527	0.152196		1.77444	0.707791
1.76225	0.61126		1.75625	0.151689		1.77544	0.704963
1.76323	0.609962		1.75724	0.15167		1.77643	0.702801
1.76422	0.608577		1.75823	0.151711		1.77743	0.701141
1.76521	0.607318		1.75921	0.152237		1.77843	0.699977
1.7662	0.605667		1.7602	0.152478		1.77943	0.698433
1.76719	0.604415		1.76119	0.151443		1.78042	0.696142
1.76818	0.603028		1.76217	0.150454		1.78142	0.693957
1.76917	0.601079		1.76316	0.149297		1.78242	0.691871
1.77016	0.598892		1.76414	0.149356		1.78342	0.689741
1.77115	0.597812		1.76513	0.150048		1.78441	0.688016
1.77214	0.595944		1.76612	0.150435		1.78541	0.685819
1.77313	0.593794		1.7671	0.150467		1.78641	0.68365
1.77412	0.591568		1.76809	0.150757		1.78741	0.681956
1.77511	0.589375		1.76908	0.151035		1.7884	0.680896
1.7761	0.587649		1.77006	0.15146		1.7894	0.680154
1.77709	0.586258		1.77105	0.15209		1.7904	0.678562
1.77808	0.584866		1.77204	0.152762		1.7914	0.676649
1.77907	0.583197		1.77302	0.152936		1.79239	0.674711
1.78006	0.581419		1.77401	0.152734		1.79339	0.673623
1.78105	0.5793		1.775	0.152628		1.79439	0.672642
1.78204	0.577329		1.77598	0.152454		1.79539	0.671158
1.78303	0.57578		1.77697	0.152289		1.79638	0.668861
1.78402	0.574072		1.77795	0.152275		1.79738	0.666934
1.78501	0.572084		1.77894	0.152685		1.79838	0.665754
1.786	0.570228		1.77993	0.152575		1.79937	0.664315
1.78699	0.568373		1.78091	0.151975		1.80037	0.663486
1.78798	0.566875		1.7819	0.152017		1.80137	0.66208
1.78897	0.565948		1.78289	0.151833		1.80237	0.660025
1.78996	0.565157		1.78387	0.151834		1.80336	0.658514
1.79095	0.563841		1.78486	0.152301		1.80436	0.657087
1.79194	0.56221		1.78584	0.15239		1.80536	0.655454
1.79293	0.5605		1.78683	0.152279		1.80635	0.65343
1.79392	0.5588		1.78782	0.152192		1.80735	0.651208
1.79491	0.557879		1.7888	0.152254		1.80835	0.648638
1.7959	0.556353		1.78979	0.152608		1.80935	0.646566
1.79689	0.554762		1.79078	0.153005		1.81035	0.645003
1.79788	0.552848		1.79176	0.152503		1.81134	0.643656
1.79887	0.550494		1.79275	0.152375		1.81234	0.642056
1.79986	0.548068		1.79374	0.152434		1.81334	0.640094
1.80085	0.545944		1.79472	0.152238		1.81433	0.638167
1.80184	0.544594		1.79571	0.152545		1.81533	0.636429
1.80283	0.543274		1.79669	0.152704		1.81633	0.634377
1.80382	0.541463		1.79768	0.152627		1.81733	0.633232
1.80481	0.539779		1.79867	0.152603		1.81832	0.632088
1.8058	0.537669		1.79966	0.152435		1.81932	0.629865
1.80679	0.535591		1.80064	0.151783		1.82032	0.628632
1.80778	0.533823		1.80163	0.150901		1.82132	0.626818
1.80877	0.532571		1.80261	0.150319		1.82231	0.626016
1.80976	0.531866		1.8036	0.149336		1.82331	0.625614
1.81075	0.530657		1.80459	0.148812		1.82431	0.62485
1.81174	0.528883		1.80557	0.148968		1.8253	0.623281
1.81273	0.526913		1.80656	0.149003		1.8263	0.621274
1.81372	0.525718		1.80755	0.149047		1.8273	0.619361
1.81471	0.524428		1.80853	0.149283		1.8283	0.617622
1.8157	0.522669		1.80952	0.149261		1.82929	0.616759
1.81669	0.520909		1.81051	0.150143		1.83029	0.615906
1.81768	0.519537		1.81149	0.150264		1.83129	0.614452
1.81867	0.518282		1.81248	0.150688		1.83229	0.612615
1.81966	0.517164		1.81346	0.150432		1.83328	0.611458
1.82065	0.515845		1.81445	0.150743		1.83428	0.609936
1.82164	0.514773		1.81544	0.150723		1.83528	0.608822
1.82263	0.513612		1.81642	0.151374		1.83628	0.607199
1.82362	0.511827		1.81741	0.150709		1.83727	0.605843
1.82461	0.510687		1.8184	0.15097		1.83827	0.604028
1.8256	0.510003		1.81938	0.151553		1.83927	0.601663
1.82659	0.508447		1.82037	0.151878		1.84027	0.600113
1.82758	0.506551		1.82136	0.151513		1.84126	0.599166
1.82857	0.505378		1.82234	0.152425		1.84226	0.597983
1.82956	0.503962		1.82333	0.152685		1.84326	0.596464
1.83055	0.501826		1.82431	0.152629		1.84425	0.594576
1.83154	0.500188		1.8253	0.152869		1.84525	0.593023
1.83253	0.498666		1.82629	0.153365		1.84625	0.592103
1.83352	0.496979		1.82727	0.153002		1.84725	0.590541
1.83451	0.495227		1.82826	0.151678		1.84824	0.588438
1.8355	0.493919		1.82925	0.151823		1.84924	0.586718
1.83649	0.493595		1.83023	0.15236		1.85024	0.584504
1.83748	0.492741		1.83122	0.15293		1.85124	0.582996
1.83847	0.490575		1.83221	0.154129		1.85223	0.582759
1.83946	0.488193		1.83319	0.153711		1.85323	0.582492
1.84045	0.486487		1.83418	0.15329		1.85423	0.581873
1.84144	0.485332		1.83516	0.153564		1.85523	0.580294
1.84243	0.4837		1.83615	0.154481		1.85622	0.578665
1.84342	0.481974		1.83714	0.154451		1.85722	0.57745
1.84441	0.48065		1.83813	0.154861		1.85822	0.576879
1.8454	0.479315		1.83911	0.154798		1.85922	0.575718
1.84639	0.477814		1.8401	0.155285		1.86021	0.573754
1.84738	0.476707		1.84108	0.154916		1.86121	0.571792
1.84837	0.476409		1.84207	0.155268		1.86221	0.569356
1.84936	0.475395		1.84306	0.156241		1.8632	0.566996
1.85035	0.473956		1.84404	0.156575		1.8642	0.565708
1.85134	0.472718		1.84503	0.1558		1.8652	0.564879
1.85233	0.471177		1.84602	0.155543		1.8662	0.56373
1.85332	0.46963		1.847	0.156344		1.86719	0.561937
1.85431	0.468258		1.84799	0.156475		1.86819	0.560323
1.8553	0.467407		1.84898	0.156938		1.86919	0.558731
1.85629	0.466951		1.84996	0.157055		1.87019	0.556861
1.85728	0.465568		1.85095	0.156715		1.87118	0.555443
1.85827	0.464556		1.85193	0.156237		1.87218	0.553799
1.85926	0.462969		1.85292	0.156801		1.87318	0.551732
1.86025	0.461115		1.85391	0.156718		1.87417	0.549327
1.86124	0.459162		1.85489	0.157146		1.87517	0.547427
1.86223	0.457946		1.85588	0.157261		1.87617	0.546743
1.86322	0.456697		1.85687	0.157912		1.87717	0.545366
1.86421	0.455048		1.85785	0.157454		1.87817	0.543823
1.8652	0.453823		1.85884	0.157756		1.87916	0.542472
1.86619	0.452527		1.85983	0.158147		1.88016	0.540917
1.86718	0.45098		1.86081	0.159262		1.88116	0.538754
1.86817	0.449649		1.8618	0.159829		1.88215	0.537541
1.86916	0.448238		1.86278	0.160349		1.88315	0.536137
1.87015	0.446854		1.86377	0.160008		1.88415	0.534761
1.87114	0.445599		1.86476	0.159691		1.88515	0.533312
1.87213	0.444132		1.86574	0.160263		1.88614	0.532491
1.87312	0.442648		1.86673	0.160951		1.88714	0.531154
1.87411	0.441619		1.86772	0.159719		1.88814	0.529304
1.8751	0.439439		1.8687	0.158815		1.88914	0.528065
1.87609	0.437403		1.86969	0.158387		1.89013	0.526822
1.87708	0.436092		1.87068	0.15839		1.89113	0.525352
1.87807	0.43455		1.87166	0.157644		1.89213	0.523437
1.87906	0.433062		1.87265	0.157545		1.89312	0.521195
1.88005	0.432183		1.87363	0.157962		1.89412	0.519235
1.88104	0.431218		1.87462	0.158296		1.89512	0.517529
1.88203	0.42925		1.87561	0.158221		1.89612	0.516127
1.88302	0.42743		1.87659	0.158619		1.89711	0.515138
1.88401	0.425404		1.87758	0.15925		1.89811	0.514303
1.885	0.423588		1.87857	0.158883		1.89911	0.513145
1.88599	0.421352		1.87955	0.158665		1.90011	0.511921
1.88698	0.418955		1.88054	0.158488		1.9011	0.510358
1.88797	0.417258		1.88153	0.157487		1.9021	0.508173
1.88896	0.415846		1.88251	0.158445		1.9031	0.506215
1.88995	0.41344		1.8835	0.158003		1.9041	0.50472
1.89094	0.411405		1.88448	0.157381		1.90509	0.503521
1.89193	0.409961		1.88547	0.15715		1.90609	0.502636
1.89292	0.409634		1.88646	0.157282		1.90709	0.501495
1.89391	0.40776		1.88744	0.156835		1.90809	0.499937
1.8949	0.405923		1.88843	0.156491		1.90908	0.498777
1.89589	0.40436		1.88942	0.156982		1.91008	0.498374
1.89688	0.402777		1.8904	0.15746		1.91108	0.497457
1.89787	0.401004		1.89139	0.15766		1.91207	0.49614
1.89886	0.399993		1.89238	0.157172		1.91307	0.494873
1.89985	0.399181		1.89336	0.157594		1.91407	0.493219
1.90084	0.397485		1.89435	0.157252		1.91507	0.491388
1.90183	0.39647		1.89534	0.15778		1.91606	0.48994
1.90282	0.394739		1.89632	0.156059		1.91706	0.489037
1.90381	0.393002		1.89731	0.155545		1.91806	0.487979
1.9048	0.391257		1.8983	0.155462		1.91906	0.486523
1.90579	0.388343		1.89928	0.155639		1.92005	0.485242
1.90678	0.386922		1.90027	0.156685		1.92105	0.484512
1.90777	0.38569		1.90125	0.157721		1.92205	0.483607
1.90876	0.384095		1.90224	0.157981		1.92305	0.482218
1.90975	0.383331		1.90323	0.157986		1.92404	0.481039
1.91074	0.383098		1.90421	0.158034		1.92504	0.47979
1.91173	0.381882		1.9052	0.158156		1.92604	0.478131
1.91272	0.380308		1.90619	0.158235		1.92704	0.476901
1.91371	0.377697		1.90717	0.158189		1.92803	0.475719
1.9147	0.375385		1.90816	0.15824		1.92903	0.474296
1.91569	0.373655		1.90915	0.158271		1.93003	0.472883
1.91668	0.372096		1.91013	0.158589		1.93102	0.472261
1.91767	0.369771		1.91112	0.158466		1.93202	0.471654
1.91866	0.368105		1.9121	0.15787		1.93302	0.470762
1.91965	0.366492		1.91309	0.157557		1.93402	0.469232
1.92064	0.364294		1.91408	0.157634		1.93501	0.467639
1.92163	0.362293		1.91506	0.157325		1.93601	0.465932
1.92262	0.360394		1.91605	0.157232		1.93701	0.464468
1.92361	0.358496		1.91704	0.157568		1.93801	0.463873
1.9246	0.356773		1.91802	0.157496		1.939	0.463174
1.92559	0.355131		1.91901	0.157187		1.94	0.461962
1.92658	0.353931		1.92	0.157086		1.941	0.460467
1.92757	0.352525		1.92098	0.157649		1.94199	0.459362
1.92856	0.350459		1.92197	0.157837		1.94299	0.459303
1.92955	0.348518		1.92295	0.157593		1.94399	0.458929
1.93054	0.347004		1.92394	0.15832		1.94499	0.458441
1.93153	0.345745		1.92493	0.159519		1.94599	0.457698
1.93252	0.344527		1.92591	0.159744		1.94698	0.456218
1.93351	0.343777		1.9269	0.160093		1.94798	0.455072
1.9345	0.343252		1.92789	0.160755		1.94898	0.45385
1.93549	0.341658		1.92887	0.160817		1.94997	0.45241
1.93648	0.340525		1.92986	0.160669		1.95097	0.451219
1.93747	0.340112		1.93085	0.160524		1.95197	0.449942
1.93846	0.339172		1.93183	0.160674		1.95297	0.448972
1.93945	0.338089		1.93282	0.161216		1.95396	0.448015
1.94044	0.336984		1.9338	0.16116		1.95496	0.446728
1.94143	0.335005		1.93479	0.16167		1.95596	0.445307
1.94242	0.333736		1.93578	0.161858		1.95696	0.443801
1.94341	0.333205		1.93677	0.161994		1.95795	0.442539
1.9444	0.332424		1.93775	0.161838		1.95895	0.441534
1.94539	0.331938		1.93874	0.161274		1.95995	0.439746
1.94638	0.330667		1.93972	0.161448		1.96094	0.438603
1.94737	0.329037		1.94071	0.161425		1.96194	0.438155
1.94836	0.327133		1.9417	0.161054		1.96294	0.437632
1.94935	0.325732		1.94268	0.160811		1.96394	0.437169
1.95034	0.323697		1.94367	0.159999		1.96493	0.436327
1.95133	0.323037		1.94466	0.160597		1.96593	0.435274
1.95232	0.321789		1.94564	0.161684		1.96693	0.434544
1.95331	0.320954		1.94663	0.161494		1.96793	0.433977
1.9543	0.319727		1.94762	0.161091		1.96892	0.432927
1.95529	0.319666		1.9486	0.160682		1.96992	0.432081
1.95628	0.318539		1.94959	0.159856		1.97092	0.431374
1.95727	0.317258		1.95057	0.159261		1.97192	0.430705
1.95826	0.316052		1.95156	0.159572		1.97291	0.430516
1.95925	0.314072		1.95255	0.159687		1.97391	0.430194
1.96024	0.312449		1.95353	0.158999		1.97491	0.429018
1.96123	0.310803		1.95452	0.158067		1.97591	0.428556
1.96222	0.308973		1.95551	0.157695		1.9769	0.428294
1.96321	0.308279		1.95649	0.157665		1.9779	0.4272
1.9642	0.307347		1.95748	0.157177		1.9789	0.425892
1.96519	0.306817		1.95847	0.156744		1.97989	0.42442
1.96618	0.305297		1.95945	0.156892		1.98089	0.423534
1.96717	0.30535		1.96044	0.156611		1.98189	0.422482
1.96816	0.304896		1.96142	0.156857		1.98289	0.421436
1.96915	0.303276		1.96241	0.157012		1.98388	0.420862
1.97014	0.302094		1.9634	0.156723		1.98488	0.420383
1.97113	0.302204		1.96438	0.156512		1.98588	0.419044
1.97212	0.301511		1.96537	0.156838		1.98688	0.417843
1.97311	0.300996		1.96636	0.157014		1.98787	0.416576
1.9741	0.300263		1.96734	0.157413		1.98887	0.415484
1.97509	0.299877		1.96833	0.157876		1.98987	0.414328
1.97608	0.298535		1.96932	0.157325		1.99087	0.413159
[truncated: 22,793 more rows]
