# Supplementary material for: NirD curtails the stringent response by inhibiting RelA activity in Escherichia coli
Source: eLife. 2021 Jul 29;10:e64092. doi: 10.7554/eLife.64092 (PMC8321558; doi:10.7554/eLife.64092)
Supplement: Figure 5—source data 1. — The source data are provided for the BLI experiments in Figure 5A, which are represented as the means and SDs of three independent experiments. [file elife-64092-fig5-data1.xlsx]

## Sheet: Figure 5–source data 1
Figure 5–source data 1. Raw data for BLI experiments
Response (nm)
		Time (seconds)
		0	0.2	0.4	0.6	0.8	1	1.2	1.4	1.6	1.8	2	2.2	2.4	2.6	2.8	3	3.2	3.4	3.6	3.8	4	4.2	4.4	4.6	4.8	5	5.2	5.4	5.6	5.8	6	6.2	6.4	6.6	6.8	7	7.2	7.4	7.6	7.8	8	8.2	8.4	8.6	8.8	9	9.2	9.4
Replica 1	RelA1-396 30 µM + NirD	0.157	0.15	0.143	0.136	0.128	0.12	0.112	0.104	0.097	0.091	0.086	0.082	0.079	0.077	0.075	0.072	0.07	0.069	0.067	0.066	0.064	0.063	0.062	0.061	0.06	0.059	0.058	0.058	0.057	0.056	0.055	0.054	0.053	0.052	0.051	0.05	0.049	0.048	0.047	0.046	0.045	0.044	0.043	0.042	0.042	0.041	0.04	0.04
	RelA1-396 10 µM + NirD	0.113	0.11	0.107	0.103	0.099	0.095	0.09	0.085	0.08	0.076	0.072	0.068	0.065	0.063	0.061	0.059	0.057	0.056	0.055	0.054	0.054	0.053	0.052	0.051	0.05	0.049	0.048	0.047	0.046	0.046	0.045	0.044	0.043	0.042	0.041	0.041	0.04	0.039	0.038	0.038	0.037	0.036	0.035	0.034	0.034	0.033	0.033	0.033
	RelA1-396 3 µM + NirD	0.044	0.038	0.031	0.025	0.018	0.012	0.006	0.001	-0.003	-0.006	-0.008	-0.008	-0.008	-0.008	-0.008	-0.008	-0.008	-0.008	-0.007	-0.007	-0.007	-0.007	-0.007	-0.007	-0.007	-0.007	-0.007	-0.007	-0.007	-0.007	-0.007	-0.007	-0.007	-0.007	-0.007	-0.007	-0.006	-0.006	-0.007	-0.007	-0.007	-0.007	-0.007	-0.007	-0.007	-0.007	-0.007	-0.006
	RelA1-396 1 µM + NirD	-0.046	-0.044	-0.042	-0.04	-0.038	-0.036	-0.035	-0.033	-0.032	-0.032	-0.032	-0.032	-0.031	-0.031	-0.03	-0.03	-0.029	-0.029	-0.028	-0.027	-0.027	-0.026	-0.026	-0.025	-0.025	-0.024	-0.024	-0.024	-0.023	-0.022	-0.022	-0.021	-0.02	-0.02	-0.019	-0.018	-0.017	-0.017	-0.016	-0.016	-0.016	-0.016	-0.016	-0.016	-0.016	-0.016	-0.016	-0.015
	RelA1-396 0.3 µM + NirD	-0.024	-0.023	-0.023	-0.022	-0.021	-0.02	-0.02	-0.019	-0.019	-0.019	-0.018	-0.018	-0.018	-0.018	-0.018	-0.018	-0.018	-0.018	-0.017	-0.017	-0.017	-0.017	-0.016	-0.016	-0.016	-0.016	-0.016	-0.016	-0.016	-0.016	-0.016	-0.015	-0.015	-0.015	-0.014	-0.014	-0.013	-0.013	-0.012	-0.012	-0.012	-0.012	-0.012	-0.012	-0.012	-0.012	-0.011	-0.011
	RelA1-396 0.1 µM + NirD	0.098	0.087	0.075	0.063	0.05	0.039	0.028	0.018	0.009	0.003	-0.001	-0.002	-0.002	-0.003	-0.003	-0.003	-0.003	-0.003	-0.003	-0.003	-0.003	-0.003	-0.002	-0.002	-0.002	-0.002	-0.002	-0.002	-0.002	-0.002	-0.002	-0.002	-0.002	-0.002	-0.001	0	0	0.001	0.001	0.001	0.001	0.001	0.001	0.001	0.001	0.001	0	0
	RelA1-396 30 µM + NirDE50K	0.02775	0.025375	0.023875	0.0215	0.019	0.0175	0.015125	0.0135	0.012	0.01125	0.010375	0.010375	0.0095	0.0095	0.009375	0.0085	0.0085	0.008375	0.007375	0.007375	0.00725	0.006375	0.00625	0.00625	0.00625	0.00625	0.006125	0.00625	0.00625	0.00625	0.007125	0.007125	0.00625	0.00625	0.00625	0.00625	0.00625	0.00525	0.00525	0.00525	0.00525	0.00525	0.00525	0.00525	0.00525	0.00525	0.00525	0.00525
	RelA1-396 10 µM + NirDE50K	-0.007	-0.004	-0.001	0.001	0.004	0.006	0.007	0.009	0.01	0.01	0.011	0.01	0.01	0.01	0.01	0.009	0.009	0.009	0.009	0.009	0.009	0.009	0.009	0.009	0.008	0.008	0.008	0.008	0.007	0.007	0.007	0.007	0.007	0.007	0.007	0.007	0.007	0.007	0.006	0.006	0.006	0.006	0.006	0.005	0.005	0.005	0.005	0.005
Replica 2	RelA1-396 30 µM + NirD	0.171	0.163	0.154	0.145	0.135	0.125	0.115	0.106	0.098	0.091	0.085	0.082	0.079	0.076	0.074	0.072	0.071	0.069	0.068	0.067	0.066	0.066	0.065	0.064	0.063	0.061	0.06	0.059	0.058	0.057	0.055	0.054	0.053	0.052	0.051	0.05	0.049	0.048	0.047	0.046	0.046	0.045	0.044	0.043	0.042	0.042	0.041	0.041
	RelA1-396 10 µM + NirD	0.133	0.129	0.124	0.118	0.112	0.106	0.1	0.093	0.087	0.082	0.077	0.073	0.069	0.066	0.064	0.062	0.06	0.058	0.057	0.056	0.055	0.054	0.053	0.052	0.051	0.05	0.049	0.048	0.047	0.046	0.044	0.043	0.042	0.042	0.041	0.04	0.039	0.039	0.038	0.037	0.036	0.035	0.035	0.034	0.033	0.031	0.03	0.029
	RelA1-396 3 µM + NirD	-0.005	-0.005	-0.006	-0.007	-0.008	-0.009	-0.01	-0.012	-0.013	-0.015	-0.016	-0.017	-0.017	-0.018	-0.018	-0.018	-0.018	-0.018	-0.018	-0.017	-0.017	-0.016	-0.015	-0.015	-0.014	-0.014	-0.014	-0.014	-0.013	-0.013	-0.012	-0.012	-0.012	-0.011	-0.011	-0.011	-0.011	-0.011	-0.011	-0.011	-0.011	-0.011	-0.011	-0.011	-0.011	-0.011	-0.011	-0.011
	RelA1-396 1 µM + NirD	-0.026	-0.026	-0.025	-0.024	-0.024	-0.023	-0.023	-0.022	-0.022	-0.022	-0.022	-0.022	-0.022	-0.021	-0.021	-0.021	-0.02	-0.02	-0.019	-0.019	-0.018	-0.017	-0.017	-0.016	-0.016	-0.015	-0.015	-0.014	-0.014	-0.014	-0.013	-0.013	-0.012	-0.012	-0.011	-0.011	-0.01	-0.009	-0.009	-0.009	-0.009	-0.008	-0.008	-0.008	-0.008	-0.007	-0.007	-0.007
	RelA1-396 0.3 µM + NirD	-0.014	-0.014	-0.014	-0.015	-0.015	-0.015	-0.016	-0.016	-0.017	-0.017	-0.017	-0.017	-0.017	-0.016	-0.016	-0.015	-0.014	-0.014	-0.013	-0.012	-0.011	-0.01	-0.01	-0.009	-0.009	-0.009	-0.009	-0.009	-0.009	-0.008	-0.008	-0.008	-0.007	-0.006	-0.006	-0.005	-0.005	-0.005	-0.004	-0.004	-0.004	-0.004	-0.004	-0.005	-0.005	-0.005	-0.005	-0.005
	RelA1-396 0.1 µM + NirD	0.126	0.112	0.098	0.082	0.067	0.052	0.038	0.026	0.016	0.008	0.003	0.002	0.001	0	0	0	0	0	0	0	0	0	0.001	0.001	0.001	0.001	0.001	0.001	0.001	0.001	0	0	0	0	0.001	0.001	0.002	0.002	0.002	0.002	0.002	0.002	0.002	0.002	0.002	0.002	0.001	0.001
	RelA1-396 30 µM + NirDE50K	-0.014	-0.011	-0.007	-0.004	-0.001	0.002	0.004	0.006	0.008	0.009	0.009	0.009	0.008	0.008	0.008	0.008	0.008	0.008	0.008	0.008	0.008	0.008	0.008	0.008	0.008	0.008	0.008	0.007	0.007	0.008	0.008	0.008	0.008	0.007	0.007	0.007	0.006	0.006	0.006	0.006	0.006	0.006	0.006	0.006	0.006	0.006	0.006	0.006
	RelA1-396 10 µM + NirDE50K	0.007	0.008	0.009	0.01	0.011	0.012	0.012	0.012	0.012	0.012	0.012	0.012	0.011	0.011	0.011	0.011	0.011	0.011	0.011	0.012	0.012	0.012	0.013	0.013	0.013	0.013	0.013	0.013	0.013	0.013	0.013	0.013	0.013	0.012	0.012	0.011	0.011	0.01	0.01	0.01	0.01	0.009	0.009	0.009	0.009	0.009	0.008	0.008
Replica 3	RelA1-396 30 µM + NirD	0.134	0.129	0.125	0.119	0.114	0.107	0.101	0.095	0.089	0.083	0.079	0.075	0.071	0.068	0.066	0.064	0.062	0.06	0.059	0.057	0.057	0.056	0.055	0.054	0.053	0.052	0.052	0.051	0.05	0.049	0.048	0.047	0.045	0.044	0.043	0.043	0.042	0.041	0.041	0.04	0.039	0.038	0.037	0.037	0.036	0.035	0.035	0.034
	RelA1-396 10 µM + NirD	0.127	0.124	0.121	0.117	0.112	0.108	0.103	0.097	0.092	0.087	0.082	0.078	0.075	0.072	0.07	0.067	0.066	0.064	0.063	0.062	0.06	0.059	0.058	0.057	0.056	0.055	0.053	0.052	0.051	0.049	0.048	0.047	0.046	0.045	0.044	0.043	0.043	0.042	0.041	0.041	0.04	0.039	0.039	0.038	0.037	0.036	0.036	0.035
	RelA1-396 3 µM + NirD	-0.024	-0.024	-0.023	-0.022	-0.021	-0.02	-0.02	-0.019	-0.019	-0.018	-0.018	-0.018	-0.018	-0.017	-0.017	-0.017	-0.017	-0.017	-0.016	-0.016	-0.015	-0.015	-0.014	-0.014	-0.014	-0.013	-0.013	-0.013	-0.013	-0.012	-0.012	-0.011	-0.011	-0.01	-0.009	-0.009	-0.008	-0.008	-0.007	-0.007	-0.007	-0.007	-0.007	-0.008	-0.008	-0.008	-0.008	-0.007
	RelA1-396 1 µM + NirD	-0.012	-0.013	-0.014	-0.016	-0.017	-0.019	-0.02	-0.022	-0.023	-0.025	-0.025	-0.026	-0.026	-0.026	-0.026	-0.026	-0.025	-0.025	-0.025	-0.024	-0.024	-0.023	-0.023	-0.022	-0.021	-0.021	-0.02	-0.02	-0.02	-0.019	-0.019	-0.018	-0.018	-0.017	-0.017	-0.016	-0.015	-0.015	-0.015	-0.014	-0.014	-0.014	-0.014	-0.014	-0.013	-0.013	-0.013	-0.013
	RelA1-396 0.3 µM + NirD	-0.009	-0.01	-0.01	-0.01	-0.011	-0.011	-0.012	-0.012	-0.013	-0.013	-0.014	-0.014	-0.014	-0.013	-0.013	-0.013	-0.012	-0.012	-0.012	-0.012	-0.011	-0.011	-0.01	-0.01	-0.009	-0.009	-0.009	-0.009	-0.009	-0.009	-0.009	-0.008	-0.008	-0.008	-0.007	-0.007	-0.007	-0.007	-0.007	-0.007	-0.007	-0.007	-0.007	-0.007	-0.006	-0.006	-0.006	-0.006
	RelA1-396 0.1 µM + NirD	-0.005	-0.005	-0.006	-0.007	-0.007	-0.008	-0.009	-0.011	-0.012	-0.013	-0.014	-0.015	-0.015	-0.015	-0.015	-0.015	-0.015	-0.014	-0.014	-0.014	-0.013	-0.013	-0.013	-0.013	-0.012	-0.012	-0.013	-0.013	-0.013	-0.013	-0.013	-0.013	-0.012	-0.012	-0.011	-0.01	-0.01	-0.009	-0.009	-0.009	-0.009	-0.009	-0.009	-0.009	-0.009	-0.009	-0.009	-0.009
	RelA1-396 30 µM + NirDE50K	0.032	0.029	0.027	0.024	0.021	0.019	0.016	0.014	0.012	0.011	0.01	0.01	0.009	0.009	0.009	0.008	0.008	0.008	0.007	0.007	0.007	0.006	0.006	0.006	0.006	0.006	0.006	0.006	0.006	0.006	0.007	0.007	0.006	0.006	0.006	0.006	0.006	0.005	0.005	0.005	0.005	0.005	0.005	0.005	0.005	0.005	0.005	0.005
	RelA1-396 10 µM + NirDE50K	-0.02	-0.017	-0.015	-0.012	-0.01	-0.007	-0.006	-0.004	-0.003	-0.002	-0.001	-0.001	-0.001	-0.001	-0.001	-0.001	-0.001	-0.001	-0.001	-0.001	0	0	0	0.001	0.001	0.001	0.001	0.001	0.001	0	0	0	0	0	-0.001	-0.001	-0.002	-0.002	-0.002	-0.002	-0.002	-0.002	-0.001	-0.001	-0.001	-0.001	-0.001	-0.001
Means
		Time (seconds)
		0	0.2	0.4	0.6	0.8	1	1.2	1.4	1.6	1.8	2	2.2	2.4	2.6	2.8	3	3.2	3.4	3.6	3.8	4	4.2	4.4	4.6	4.8	5	5.2	5.4	5.6	5.8	6	6.2	6.4	6.6	6.8	7	7.2	7.4	7.6	7.8	8	8.2	8.4	8.6	8.8	9	9.2	9.4
	RelA1-396 30 µM + NirD	0.154	0.147333	0.140667	0.133333	0.125667	0.117333	0.109333	0.101667	0.0946667	0.0883333	0.0833333	0.0796667	0.0763333	0.0736667	0.0716667	0.0693333	0.0676667	0.066	0.0646667	0.0633333	0.0623333	0.0616667	0.0606667	0.0596667	0.0586667	0.0573333	0.0566667	0.056	0.055	0.054	0.0526667	0.0516667	0.0503333	0.0493333	0.0483333	0.0476667	0.0466667	0.0456667	0.045	0.044	0.0433333	0.0423333	0.0413333	0.0406667	0.04	0.0393333	0.0386667	0.0383333
	RelA1-396 10 µM + NirD	0.124333	0.121	0.117333	0.112667	0.107667	0.103	0.0976667	0.0916667	0.0863333	0.0816667	0.077	0.073	0.0696667	0.067	0.065	0.0626667	0.061	0.0593333	0.0583333	0.0573333	0.0563333	0.0553333	0.0543333	0.0533333	0.0523333	0.0513333	0.05	0.049	0.048	0.047	0.0456667	0.0446667	0.0436667	0.043	0.042	0.0413333	0.0406667	0.04	0.039	0.0386667	0.0376667	0.0366667	0.0363333	0.0353333	0.0346667	0.0333333	0.033	0.0323333
	RelA1-396 3 µM + NirD	0.005	0.003	0.000666667	-0.00133333	-0.00366667	-0.00566667	-0.008	-0.01	-0.0116667	-0.013	-0.014	-0.0143333	-0.0143333	-0.0143333	-0.0143333	-0.0143333	-0.0143333	-0.0143333	-0.0136667	-0.0133333	-0.013	-0.0126667	-0.012	-0.012	-0.0116667	-0.0113333	-0.0113333	-0.0113333	-0.011	-0.0106667	-0.0103333	-0.01	-0.01	-0.00933333	-0.009	-0.009	-0.00833333	-0.00833333	-0.00833333	-0.00833333	-0.00833333	-0.00833333	-0.00833333	-0.00866667	-0.00866667	-0.00866667	-0.00866667	-0.008
	RelA1-396 1 µM + NirD	-0.028	-0.0276667	-0.027	-0.0266667	-0.0263333	-0.026	-0.026	-0.0256667	-0.0256667	-0.0263333	-0.0263333	-0.0266667	-0.0263333	-0.026	-0.0256667	-0.0256667	-0.0246667	-0.0246667	-0.024	-0.0233333	-0.023	-0.022	-0.022	-0.021	-0.0206667	-0.02	-0.0196667	-0.0193333	-0.019	-0.0183333	-0.018	-0.0173333	-0.0166667	-0.0163333	-0.0156667	-0.015	-0.014	-0.0136667	-0.0133333	-0.013	-0.013	-0.0126667	-0.0126667	-0.0126667	-0.0123333	-0.012	-0.012	-0.0116667
	RelA1-396 0.3 µM + NirD	-0.0156667	-0.0156667	-0.0156667	-0.0156667	-0.0156667	-0.0153333	-0.016	-0.0156667	-0.0163333	-0.0163333	-0.0163333	-0.0163333	-0.0163333	-0.0156667	-0.0156667	-0.0153333	-0.0146667	-0.0146667	-0.014	-0.0136667	-0.013	-0.0126667	-0.012	-0.0116667	-0.0113333	-0.0113333	-0.0113333	-0.0113333	-0.0113333	-0.011	-0.011	-0.0103333	-0.01	-0.00966667	-0.009	-0.00866667	-0.00833333	-0.00833333	-0.00766667	-0.00766667	-0.00766667	-0.00766667	-0.00766667	-0.008	-0.00766667	-0.00766667	-0.00733333	-0.00733333
	RelA1-396 0.1 µM + NirD	0.073	0.0646667	0.0556667	0.046	0.0366667	0.0276667	0.019	0.011	0.00433333	-0.000666667	-0.004	-0.005	-0.00533333	-0.006	-0.006	-0.006	-0.006	-0.00566667	-0.00566667	-0.00566667	-0.00533333	-0.00533333	-0.00466667	-0.00466667	-0.00433333	-0.00433333	-0.00466667	-0.00466667	-0.00466667	-0.00466667	-0.005	-0.005	-0.00466667	-0.00466667	-0.00366667	-0.003	-0.00266667	-0.002	-0.002	-0.002	-0.002	-0.002	-0.002	-0.002	-0.002	-0.002	-0.00266667	-0.00266667
	RelA1-396 30 µM + NirDE50K	0.01525	0.0144583	0.014625	0.0138333	0.013	0.0128333	0.0117083	0.0111667	0.0106667	0.0104167	0.00979167	0.00979167	0.00883333	0.00883333	0.00879167	0.00816667	0.00816667	0.008125	0.00745833	0.00745833	0.00741667	0.00679167	0.00675	0.00675	0.00675	0.00675	0.00670833	0.00641667	0.00641667	0.00675	0.007375	0.007375	0.00675	0.00641667	0.00641667	0.00641667	0.00608333	0.00541667	0.00541667	0.00541667	0.00541667	0.00541667	0.00541667	0.00541667	0.00541667	0.00541667	0.00541667	0.00541667
	RelA1-396 10 µM + NirDE50K	-0.00666667	-0.00433333	-0.00233333	-0.000333333	0.00166667	0.00366667	0.00433333	0.00566667	0.00633333	0.00666667	0.00733333	0.007	0.00666667	0.00666667	0.00666667	0.00633333	0.00633333	0.00633333	0.00633333	0.00666667	0.007	0.007	0.00733333	0.00766667	0.00733333	0.00733333	0.00733333	0.00733333	0.007	0.00666667	0.00666667	0.00666667	0.00666667	0.00633333	0.006	0.00566667	0.00533333	0.005	0.00466667	0.00466667	0.00466667	0.00433333	0.00466667	0.00433333	0.00433333	0.00433333	0.004	0.004
SDs
		Time (seconds)
		0	0.2	0.4	0.6	0.8	1	1.2	1.4	1.6	1.8	2	2.2	2.4	2.6	2.8	3	3.2	3.4	3.6	3.8	4	4.2	4.4	4.6	4.8	5	5.2	5.4	5.6	5.8	6	6.2	6.4	6.6	6.8	7	7.2	7.4	7.6	7.8	8	8.2	8.4	8.6	8.8	9	9.2	9.4
	RelA1-396 30 µM + NirD	0.0186815	0.0171561	0.0146401	0.0132035	0.0106927	0.00929157	0.00737111	0.00585947	0.00493288	0.0046188	0.00378594	0.00404145	0.0046188	0.00493288	0.00493288	0.0046188	0.00493288	0.00519615	0.00493288	0.00550757	0.00472582	0.0051316	0.0051316	0.0051316	0.0051316	0.00472582	0.00416333	0.0043589	0.0043589	0.0043589	0.00404145	0.00404145	0.0046188	0.0046188	0.0046188	0.00404145	0.00404145	0.00404145	0.0034641	0.0034641	0.00378594	0.00378594	0.00378594	0.00321455	0.0034641	0.00378594	0.00321455	0.00378594
	RelA1-396 10 µM + NirD	0.0102632	0.00984886	0.00907377	0.0083865	0.00750555	0.007	0.00680686	0.0061101	0.00602771	0.00550757	0.005	0.005	0.00503322	0.00458258	0.00458258	0.00404145	0.00458258	0.00416333	0.00416333	0.00416333	0.00321455	0.00321455	0.00321455	0.00321455	0.00321455	0.00321455	0.00264575	0.00264575	0.00264575	0.00173205	0.00208167	0.00208167	0.00208167	0.00173205	0.00173205	0.00152753	0.00208167	0.00173205	0.00173205	0.00208167	0.00208167	0.00208167	0.0023094	0.0023094	0.00208167	0.00251661	0.003	0.00305505
	RelA1-396 3 µM + NirD	0.0350856	0.0317648	0.0276104	0.0240069	0.0198578	0.0162583	0.0131149	0.0101489	0.0080829	0.006245	0.0052915	0.00550757	0.00550757	0.00550757	0.00550757	0.00550757	0.00550757	0.00550757	0.00585947	0.00550757	0.0052915	0.00493288	0.0043589	0.0043589	0.00404145	0.00378594	0.00378594	0.00378594	0.0034641	0.00321455	0.00288675	0.00264575	0.00264575	0.00208167	0.002	0.002	0.00251661	0.00251661	0.0023094	0.0023094	0.0023094	0.0023094	0.0023094	0.00208167	0.00208167	0.00208167	0.00208167	0.00264575
	RelA1-396 1 µM + NirD	0.017088	0.0155671	0.0141067	0.0122202	0.0106927	0.00888819	0.00793725	0.00635085	0.00550757	0.0051316	0.0051316	0.00503322	0.00450925	0.005	0.00450925	0.00450925	0.00450925	0.00450925	0.00458258	0.00404145	0.00458258	0.00458258	0.00458258	0.00458258	0.00450925	0.00458258	0.00450925	0.00503322	0.00458258	0.00404145	0.00458258	0.00404145	0.00416333	0.00404145	0.00416333	0.00360555	0.00360555	0.00416333	0.00378594	0.00360555	0.00360555	0.00416333	0.00416333	0.00416333	0.00404145	0.00458258	0.00458258	0.00416333
	RelA1-396 0.3 µM + NirD	0.00763763	0.00665833	0.00665833	0.00602771	0.00503322	0.00450925	0.004	0.00351188	0.00305505	0.00305505	0.00208167	0.00208167	0.00208167	0.00251661	0.00251661	0.00251661	0.00305505	0.00305505	0.00264575	0.00288675	0.0034641	0.00378594	0.0034641	0.00378594	0.00404145	0.00404145	0.00404145	0.00404145	0.00404145	0.0043589	0.0043589	0.00404145	0.0043589	0.00472582	0.0043589	0.00472582	0.00416333	0.00416333	0.00404145	0.00404145	0.00404145	0.00404145	0.00404145	0.00360555	0.00378594	0.00378594	0.00321455	0.00321455
	RelA1-396 0.1 µM + NirD	0.0689855	0.0616144	0.0546291	0.0468722	0.0387599	0.0315647	0.0247588	0.0194679	0.0145717	0.0109697	0.00888819	0.00888819	0.0085049	0.00793725	0.00793725	0.00793725	0.00793725	0.00737111	0.00737111	0.00737111	0.00680686	0.00680686	0.00737111	0.00737111	0.00680686	0.00680686	0.00737111	0.00737111	0.00737111	0.00737111	0.007	0.007	0.0064291	0.0064291	0.0064291	0.00608276	0.0064291	0.00608276	0.00608276	0.00608276	0.00608276	0.00608276	0.00608276	0.00608276	0.00608276	0.00608276	0.00550757	0.00550757
	RelA1-396 30 µM + NirDE50K	0.0254202	0.0221219	0.0187929	0.0154946	0.0121655	0.00941187	0.00668993	0.00448144	0.0023094	0.00123322	0.00071078	0.00071078	0.000763763	0.000763763	0.00071078	0.000288675	0.000288675	0.000216506	0.000505181	0.000505181	0.000520416	0.00106311	0.00108972	0.00108972	0.00108972	0.00108972	0.00112036	0.000520416	0.000520416	0.00108972	0.000544862	0.000544862	0.00108972	0.000520416	0.000520416	0.000520416	0.000144338	0.000520416	0.000520416	0.000520416	0.000520416	0.000520416	0.000520416	0.000520416	0.000520416	0.000520416	0.000520416	0.000520416
	RelA1-396 10 µM + NirDE50K	0.0135031	0.0125033	0.0120554	0.0110604	0.0106927	0.00971253	0.00929157	0.0085049	0.00814453	0.00757188	0.00723418	0.007	0.00665833	0.00665833	0.00665833	0.0064291	0.0064291	0.0064291	0.0064291	0.00680686	0.006245	0.006245	0.00665833	0.0061101	0.00602771	0.00602771	0.00602771	0.00602771	0.006	0.00650641	0.00650641	0.00650641	0.00650641	0.00602771	0.00655744	0.0061101	0.00665833	0.006245	0.0061101	0.0061101	0.0061101	0.00568624	0.0051316	0.00503322	0.00503322	0.00503322	0.00458258	0.00458258
[truncated: 1,302 more columns]
