# Supplementary material for: NirD curtails the stringent response by inhibiting RelA activity in Escherichia coli
Source: eLife. 2021 Jul 29;10:e64092. doi: 10.7554/eLife.64092 (PMC8321558; doi:10.7554/eLife.64092)
Supplement: Figure 5—source data 2. [file elife-64092-fig5-data2.xlsx]

## Sheet: Figure 5–source data 2
Figure 5–source data 2. Raw data for ITC experiment run with NirD
Time (minutes)	DP (µcal/s)		Molar Ratio	ΔH (kcal/mol)	Fit_Molar Ratio	Fit_ΔH (kcal/mol)
0.083333	0.000826		0.114999	-3.84778	0.019075	-3.57275
0.1	0.001		0.21183	-3.20873	0.114999	-3.54768
0.116667	0.001135		0.30957	-3.39224	0.21183	-3.47909
0.133333	0.001249		0.408218	-2.86557	0.30957	-3.33196
0.15	0.001213		0.507774	-2.05993	0.408218	-2.97059
0.166667	0.001078		0.608237	-1.44566	0.507774	-2.14073
0.183333	0.001022		0.709609	-0.100398	0.608237	-1.09166
0.2	0.000915		0.811889	-0.157642	0.709609	-0.496759
0.216667	0.000788		0.915077	-0.061072	0.811889	-0.260371
0.233333	0.000831		1.01917	-0.229269	0.915077	-0.160034
0.25	0.000825		1.12418	-0.030641	1.01917	-0.110777
0.266667	0.000838		1.23009	0.01856	1.12418	-0.083503
0.283333	0.000951		1.33691	0.10678	1.23009	-0.06697
0.3	0.000849		1.44463	-0.011011	1.33691	-0.056234
0.316667	0.000188		1.55327	-0.119924	1.44463	-0.048881
0.333333	-0.000574		1.66281	-0.167764	1.55327	-0.043624
0.35	-0.000896		1.77327	-0.215601	1.66281	-0.039731
0.366667	-0.001117		1.88462	-0.211902	1.77327	-0.036762
0.383333	-0.001579				1.88462	-0.034438
0.4	-0.002179
0.416667	-0.002679
0.433333	-0.002989
0.45	-0.003429
0.466667	-0.002809
0.483333	-0.002559
0.5	-0.003038
0.516667	-0.002957
0.533333	-0.002307
0.55	-0.001386
0.566667	-0.000575
0.583333	-0.000605
0.6	-0.000749
0.616667	-0.000753
0.633333	-0.000138
0.65	0.000448
0.666667	0.000394
0.683333	0.000349
0.7	0.000186
0.716667	0.000382
0.733333	0.000609
0.75	0.001046
0.766667	0.001192
0.783333	0.001059
0.8	0.000922
0.816667	0.001175
0.833333	0.001049
0.85	0.001052
0.866667	0.001235
0.883333	0.001629
0.9	0.002252
0.916667	0.002666
0.933333	0.002819
0.95	0.002603
0.966667	0.002007
0.983333	0.00137
1	-0.000736
1.01667	-9.2e-05
1.03333	-0.003677
1.05	-0.012523
1.06667	-0.026259
1.08333	-0.034465
1.1	-0.033212
1.11667	-0.02895
1.13333	-0.021407
1.15	-0.015264
1.16667	-0.011861
1.18333	-0.011768
1.2	-0.01176
1.21667	-0.011271
1.23333	-0.010382
1.25	-0.009583
1.26667	-0.008644
1.28333	-0.007885
1.3	-0.007713
1.31667	-0.00756
1.33333	-0.007297
1.35	-0.006924
1.36667	-0.006421
1.38333	-0.005748
1.4	-0.005124
1.41667	-0.00488
1.43333	-0.004765
1.45	-0.004701
1.46667	-0.004517
1.48333	-0.004142
1.5	-0.003839
1.51667	-0.003425
1.53333	-0.003171
1.55	-0.003078
1.56667	-0.003004
1.58333	-0.00288
1.6	-0.00256
1.61667	-0.002129
1.63333	-0.001768
1.65	-0.001288
1.66667	-0.000807
1.68333	-0.000477
1.7	-0.000241
1.71667	-0.000116
1.73333	1.9e-05
1.75	0.000125
1.76667	0.00033
1.78333	0.000585
1.8	0.000673
1.81667	0.000501
1.83333	0.000628
1.85	0.000346
1.86667	7.3e-05
1.88333	-0.000319
1.9	-0.000511
1.91667	-0.000583
1.93333	-0.000816
1.95	-0.001219
1.96667	-0.001751
1.98333	-0.001824
2	-0.001687
2.01667	-0.001431
2.03333	-0.001466
2.05	-0.00127
2.06667	-0.000954
2.08333	-0.000719
2.1	-0.000533
2.11667	-0.000598
2.13333	-0.000633
2.15	-0.000419
2.16667	-0.000294
2.18333	-4.9e-05
2.2	0.000278
2.21667	0.000525
2.23333	0.000541
2.25	0.000767
2.26667	0.000704
2.28333	0.00079
2.3	0.000751
2.31667	0.000812
2.33333	0.000852
2.35	0.000822
2.36667	0.000713
2.38333	0.000303
2.4	7e-05
2.41667	-0.000105
2.43333	-0.000269
2.45	-0.000413
2.46667	-0.000597
2.48333	-0.000822
2.5	-0.000869
2.51667	-0.000598
2.53333	-0.000646
2.55	-0.000794
2.56667	-0.000712
2.58333	-0.000431
2.6	-0.000171
2.61667	-0.000131
2.63333	-0.000322
2.65	-0.000192
2.66667	6.7e-05
2.68333	0.000277
2.7	0.000536
2.71667	0.000586
2.73333	0.000796
2.75	0.000876
2.76667	0.001035
2.78333	0.001085
2.8	0.000907
2.81667	0.000788
2.83333	0.00106
2.85	0.001202
2.86667	0.001134
2.88333	0.001046
2.9	0.00074
2.91667	0.000694
2.93333	0.000378
2.95	3.2e-05
2.96667	-7.4e-05
2.98333	-0.00032
3	-0.000465
3.01667	-0.00067
3.03333	-0.000865
3.05	-0.00109
3.06667	-0.001235
3.08333	-0.00151
3.1	-0.001334
3.11667	-0.001149
3.13333	-0.001064
3.15	-0.000969
3.16667	-0.000683
3.18333	-0.000398
3.2	-0.000112
3.21667	-2.5e-05
3.23333	0.000232
3.25	0.000368
3.26667	0.000475
3.28333	0.000552
3.3	0.000611
3.31667	0.000432
3.33333	0.000432
3.35	0.000682
3.36667	0.000882
3.38333	0.001042
3.4	0.001096
3.41667	0.000551
3.43333	-0.000114
3.45	-0.000399
3.46667	6e-06
3.48333	1e-06
3.5	0.001789
3.51667	0.000859
3.53333	-0.005001
3.55	-0.028221
3.56667	-0.067252
3.58333	-0.125442
3.6	-0.176098
3.61667	-0.210114
3.63333	-0.219699
3.65	-0.198604
3.66667	-0.16538
3.68333	-0.129185
3.7	-0.100777
3.71667	-0.079397
3.73333	-0.064258
3.75	-0.054208
3.76667	-0.045558
3.78333	-0.039889
3.8	-0.039046
3.81667	-0.037831
3.83333	-0.035557
3.85	-0.033372
3.86667	-0.031718
3.88333	-0.029843
3.9	-0.028425
3.91667	-0.026525
3.93333	-0.024566
3.95	-0.022476
3.96667	-0.020647
3.98333	-0.019187
4	-0.017694
4.01667	-0.0161
4.03333	-0.015045
4.05	-0.014131
4.06667	-0.013666
4.08333	-0.012672
4.1	-0.012304
4.11667	-0.011464
4.13333	-0.010385
4.15	-0.009895
4.16667	-0.009606
4.18333	-0.009067
4.2	-0.008553
4.21667	-0.008129
4.23333	-0.007774
4.25	-0.00744
4.26667	-0.006805
4.28333	-0.006371
4.3	-0.005993
4.31667	-0.005573
4.33333	-0.005113
4.35	-0.004884
4.36667	-0.004704
4.38333	-0.004185
4.4	-0.003571
4.41667	-0.003057
4.43333	-0.002712
4.45	-0.002397
4.46667	-0.002023
4.48333	-0.001648
4.5	-0.00118
4.51667	-0.00098
4.53333	-0.00079
4.55	-0.000571
4.56667	-0.000301
4.58333	-0.000281
4.6	-0.000388
4.61667	-0.000483
4.63333	-0.000478
4.65	-0.000473
4.66667	-0.000338
4.68333	-0.000383
4.7	-0.000564
4.71667	-0.000704
4.73333	-0.001054
4.75	-0.001154
4.76667	-0.000684
4.78333	-0.000164
4.8	0.0002
4.81667	0.000535
4.83333	0.00047
4.85	0.000825
4.86667	0.000971
4.88333	0.000856
4.9	0.000685
4.91667	0.001155
4.93333	0.001745
4.95	0.002115
4.96667	0.002395
4.98333	0.002355
5	0.002217
5.01667	0.00198
5.03333	0.001832
5.05	0.001675
5.06667	0.001358
5.08333	0.0007
5.1	0.00038
5.11667	0.00058
5.13333	0.000249
5.15	0.000968
5.16667	4.7e-05
5.18333	-0.001064
5.2	-0.001542
5.21667	-0.001615
5.23333	-0.001527
5.25	-0.001969
5.26667	-0.002401
5.28333	-0.002523
5.3	-0.002547
5.31667	-0.002377
5.33333	-0.002166
5.35	-0.002106
5.36667	-0.002266
5.38333	-0.002455
5.4	-0.002348
5.41667	-0.002277
5.43333	-0.002146
5.45	-0.002106
5.46667	-0.002205
5.48333	-0.002004
5.5	-0.001734
5.51667	-0.00145
5.53333	-0.001186
5.55	-0.000873
5.56667	-0.000489
5.58333	-0.000205
5.6	-6.8e-05
5.61667	1.5e-05
5.63333	7.8e-05
5.65	0.00025
5.66667	0.000483
5.68333	0.000476
5.7	0.000366
5.71667	0.000434
5.73333	0.000563
5.75	0.000791
5.76667	0.00095
5.78333	0.000958
5.8	0.001247
5.81667	0.001307
5.83333	0.001557
5.85	0.001887
5.86667	0.001977
5.88333	0.001887
5.9	0.002099
5.91667	0.002134
5.93333	0.002689
5.95	0.003044
5.96667	0.003898
5.98333	0.004693
6	0.004991
6.01667	0.00531
6.03333	0.00523
6.05	-0.01477
6.06667	-0.044631
6.08333	-0.090311
6.1	-0.136059
6.11667	-0.174527
6.13333	-0.189674
6.15	-0.185771
6.16667	-0.162388
6.18333	-0.133695
6.2	-0.094731
6.21667	-0.082186
6.23333	-0.073582
6.25	-0.066557
6.26667	-0.060742
6.28333	-0.049918
6.3	-0.044963
6.31667	-0.038168
6.33333	-0.036974
6.35	-0.034579
6.36667	-0.032554
6.38333	-0.02909
6.4	-0.026376
6.41667	-0.023743
6.43333	-0.021729
6.45	-0.019726
6.46667	-0.017533
6.48333	-0.01516
6.5	-0.013018
6.51667	-0.010938
6.53333	-0.009238
6.55	-0.006758
6.56667	-0.005108
6.58333	-0.004588
6.6	-0.003721
6.61667	-0.003295
6.63333	-0.00274
6.65	-0.002385
6.66667	-0.002009
6.68333	-0.001924
6.7	-0.001412
6.71667	-0.001113
6.73333	-0.001094
6.75	-0.001225
6.76667	-0.000716
6.78333	-0.000317
6.8	2.7e-05
6.81667	0.000108
6.83333	0.00022
6.85	0.000261
6.86667	0.000252
6.88333	0.000523
6.9	0.000908
6.91667	0.00164
6.93333	0.002242
6.95	0.001983
6.96667	0.001575
6.98333	0.001896
7	0.002201
7.01667	0.002352
7.03333	0.002102
7.05	0.001893
7.06667	0.001623
7.08333	0.001203
7.1	0.000557
7.11667	0.000334
7.13333	8.2e-05
7.15	-0.000311
7.16667	-0.001003
7.18333	-0.001305
7.2	-0.001206
7.21667	-0.001012
7.23333	-0.000959
7.25	-0.000776
7.26667	-0.000902
7.28333	-0.001009
7.3	-0.000604
7.31667	-0.000246
7.33333	0.000302
7.35	0.00048
7.36667	0.000148
7.38333	-1.4e-05
7.4	-0.000374
7.41667	-0.000221
7.43333	-0.000379
7.45	-0.000986
7.46667	-0.000883
7.48333	-0.00089
7.5	-0.001075
7.51667	-0.001617
7.53333	-0.002319
7.55	-0.002621
7.56667	-0.002863
7.58333	-0.003175
7.6	-0.003173
7.61667	-0.002616
7.63333	-0.00192
7.65	-0.001193
7.66667	-0.000756
7.68333	-0.00026
7.7	0.000125
7.71667	0.000368
7.73333	0.000941
7.75	0.001513
7.76667	0.001546
7.78333	0.001429
7.8	0.001654
7.81667	0.002151
7.83333	0.002218
7.85	0.002335
7.86667	0.002552
7.88333	0.002669
7.9	0.002601
7.91667	0.002407
7.93333	0.002093
7.95	0.002019
7.96667	0.001655
7.98333	0.001382
8	0.001263
8.01667	0.001118
8.03333	0.000944
8.05	0.000859
8.06667	0.001015
8.08333	0.000781
8.1	0.00044
8.11667	0.000143
8.13333	-0.000385
8.15	-0.000992
8.16667	-0.001969
8.18333	-0.002837
8.2	-0.003242
8.21667	-0.003295
8.23333	-0.003748
8.25	-0.005121
8.26667	-0.006594
8.28333	-0.008037
8.3	-0.011167
8.31667	-0.008132
8.33333	0.002172
8.35	0.006797
8.36667	0.008721
8.38333	0.009305
8.4	0.007708
8.41667	0.006229
8.43333	0.00545
8.45	0.004441
8.46667	0.002572
8.48333	0.001352
8.5	0.001632
8.51667	0.001101
8.53333	-0.00271
8.55	-0.019841
8.56667	-0.046423
8.58333	-0.083624
8.6	-0.124337
8.61667	-0.154563
8.63333	-0.172458
8.65	-0.170743
8.66667	-0.154729
8.68333	-0.136594
8.7	-0.115273
8.71667	-0.096974
8.73333	-0.079496
8.75	-0.070758
8.76667	-0.060419
8.78333	-0.052221
8.8	-0.045647
8.81667	-0.042137
8.83333	-0.039177
8.85	-0.037727
8.86667	-0.035267
8.88333	-0.032747
8.9	-0.030803
8.91667	-0.028434
8.93333	-0.026144
8.95	-0.023575
8.96667	-0.021376
8.98333	-0.018726
9	-0.016444
9.01667	-0.014567
9.03333	-0.013511
9.05	-0.012634
9.06667	-0.011648
9.08333	-0.010931
9.1	-0.009822
9.11667	-0.008521
9.13333	-0.007319
9.15	-0.006208
9.16667	-0.005206
9.18333	-0.004394
9.2	-0.003751
9.21667	-0.003027
9.23333	-0.002002
9.25	-0.001208
9.26667	-0.001053
9.28333	-0.000349
9.3	-1.4e-05
9.31667	0.000131
9.33333	0.000407
9.35	0.001092
9.36667	0.000997
9.38333	0.000923
9.4	0.000897
9.41667	0.000811
9.43333	0.000635
9.45	0.000429
9.46667	0.000443
9.48333	0.000597
9.5	0.000699
9.51667	0.00084
9.53333	0.00075
9.55	0.00065
9.56667	0.000661
9.58333	0.000491
9.6	0.000489
9.61667	0.000474
9.63333	0.000318
9.65	1.3e-05
9.66667	-0.000142
9.68333	-0.000358
9.7	-0.000576
9.71667	-0.00059
9.73333	-0.000553
9.75	-0.000437
9.76667	-0.00028
9.78333	-0.000364
9.8	-0.000651
9.81667	-0.000915
9.83333	-0.001478
9.85	-0.001722
9.86667	-0.001665
9.88333	-0.001329
9.9	-0.001236
9.91667	-0.00102
9.93333	-0.000563
9.95	-0.000397
9.96667	-0.000181
9.98333	2.6e-05
10	0.000249
10.0167	0.000527
10.0333	0.000735
10.05	0.000602
10.0667	0.00065
10.0833	0.000528
10.1	0.000464
10.1167	0.000275
10.1333	-8.4e-05
10.15	-0.000323
10.1667	-0.000322
10.1833	-0.000231
10.2	-0.000242
10.2167	-0.000306
10.2333	-0.000541
10.25	-0.000905
10.2667	-0.00103
10.2833	-0.001055
10.3	-0.0012
10.3167	-0.001389
10.3333	-0.001297
10.35	-0.000956
10.3667	-0.000734
10.3833	-0.000672
10.4	-0.000701
10.4167	-0.000689
10.4333	-0.000607
10.45	-0.000466
10.4667	-8.4e-05
10.4833	0.000187
10.5	0.000411
10.5167	0.000817
10.5333	0.000964
10.55	0.00115
10.5667	0.001377
10.5833	0.001633
10.6	0.001833
10.6167	0.002009
10.6333	0.001985
10.65	0.001881
10.6667	0.001827
10.6833	0.002103
10.7	0.002263
10.7167	0.002049
10.7333	0.001866
10.75	0.001652
10.7667	0.001479
10.7833	0.001395
10.8	0.001015
10.8167	0.000589
10.8333	0.000244
10.85	-0.000342
10.8667	-0.000767
10.8833	-0.001722
10.9	-0.001986
10.9167	-0.001618
10.9333	-0.002249
10.95	-0.00303
10.9667	-0.002682
10.9833	-0.001263
11	0.000886
11.0167	0.003557
11.0333	0.003658
11.05	-0.008832
11.0667	-0.029001
11.0833	-0.055781
11.1	-0.09196
11.1167	-0.110508
11.1333	-0.128087
11.15	-0.134565
11.1667	-0.127883
11.1833	-0.118142
11.2	-0.10228
11.2167	-0.088768
11.2333	-0.080176
11.25	-0.071295
11.2667	-0.061133
11.2833	-0.052821
11.3	-0.048889
11.3167	-0.045618
11.3333	-0.042577
11.35	-0.039786
11.3667	-0.036495
11.3833	-0.033334
11.4	-0.030613
11.4167	-0.027953
11.4333	-0.025364
11.45	-0.022984
11.4667	-0.020845
11.4833	-0.018265
11.5	-0.015636
11.5167	-0.013389
11.5333	-0.011231
11.55	-0.009044
11.5667	-0.006767
11.5833	-0.00414
11.6	-0.002763
11.6167	-0.001539
11.6333	-0.000915
11.65	-0.000791
11.6667	-0.000607
11.6833	-0.000623
11.7	-0.00053
11.7167	0.00013
11.7333	-0.00022
11.75	-0.00032
11.7667	-0.0003
11.7833	-0.00044
11.8	-0.000692
11.8167	-0.000846
11.8333	-0.001271
11.85	-0.001686
11.8667	-0.001761
11.8833	-0.002126
11.9	-0.002433
11.9167	-0.002443
11.9333	-0.002114
11.95	-0.002105
11.9667	-0.002155
11.9833	-0.002256
12	-0.001918
12.0167	-0.001586
12.0333	-0.001523
12.05	-0.00128
12.0667	-0.000798
12.0833	-0.000285
12.1	0.000266
12.1167	0.000411
12.1333	0.000556
12.15	0.000862
12.1667	0.001147
12.1833	0.001602
12.2	0.002015
12.2167	0.002482
12.2333	0.002649
12.25	0.002866
12.2667	0.003113
12.2833	0.00317
12.3	0.003015
12.3167	0.002423
12.3333	0.00169
12.35	0.000978
12.3667	0.000766
12.3833	0.000554
12.4	0.000139
12.4167	0.000147
12.4333	-5.5e-05
12.45	-0.000798
12.4667	-0.00138
12.4833	-0.002202
12.5	-0.002627
12.5167	-0.002769
12.5333	-0.003232
12.55	-0.002974
12.5667	-0.002396
12.5833	-0.001929
12.6	-0.001263
12.6167	-0.000522
12.6333	-0.000561
12.65	0.00012
12.6667	0.000621
12.6833	0.000621
12.7	0.000472
12.7167	0.000402
12.7333	0.000173
12.75	0.000363
12.7667	0.001043
12.7833	0.001323
12.8	0.001325
12.8167	0.00145
12.8333	0.001195
12.85	0.00081
12.8667	0.000346
12.8833	-0.000309
12.9	-0.000562
12.9167	-0.000528
12.9333	-0.000783
12.95	-0.000579
12.9667	-9.5e-05
12.9833	0.000399
13	0.000916
13.0167	0.001243
13.0333	0.0014
13.05	0.001407
13.0667	0.001384
13.0833	0.001131
13.1	0.001031
13.1167	0.001403
13.1333	0.001906
13.15	0.002248
13.1667	0.002481
13.1833	0.002223
13.2	0.002068
13.2167	0.001276
13.2333	0.001513
13.25	0.0015
13.2667	0.001148
13.2833	0.000395
13.3	0.000495
13.3167	0.000893
13.3333	0.000142
13.35	-0.000869
13.3667	-0.00149
13.3833	-0.001852
13.4	-0.001762
13.4167	-0.001436
13.4333	-0.002241
13.45	-0.003245
13.4667	-0.00319
13.4833	-0.002094
13.5	-0.000428
13.5167	0.001382
13.5333	0.000652
13.55	-0.004338
13.5667	-0.017148
13.5833	-0.038948
13.6	-0.058388
13.6167	-0.068854
13.6333	-0.081921
13.65	-0.085017
13.6667	-0.082144
13.6833	-0.07785
13.7	-0.070737
13.7167	-0.062621
13.7333	-0.059825
13.75	-0.054349
13.7667	-0.048343
13.7833	-0.043327
13.8	-0.037861
13.8167	-0.034794
13.8333	-0.031667
13.85	-0.028989
13.8667	-0.027002
13.8833	-0.024535
13.9	-0.021917
13.9167	-0.01948
13.9333	-0.017432
13.95	-0.015325
13.9667	-0.012637
13.9833	-0.011699
14	-0.010702
14.0167	-0.009655
14.0333	-0.009178
14.05	-0.008861
14.0667	-0.008254
14.0833	-0.007167
14.1	-0.0066
14.1167	-0.006375
14.1333	-0.00563
14.15	-0.005265
14.1667	-0.004739
14.1833	-0.004354
14.2	-0.003899
14.2167	-0.003547
14.2333	-0.003304
14.25	-0.002902
14.2667	-0.002489
14.2833	-0.002246
14.3	-0.002084
14.3167	-0.001906
14.3333	-0.001977
14.35	-0.001508
14.3667	-0.000979
14.3833	-0.000741
14.4	-0.000502
14.4167	-0.000538
14.4333	-0.000114
14.45	-0.00012
14.4667	9.4e-05
14.4833	0.000138
14.5	4.1e-05
14.5167	0.000549
14.5333	0.000937
14.55	0.000935
14.5667	0.001354
14.5833	0.001902
14.6	0.002109
14.6167	0.001891
14.6333	0.001872
14.65	0.001853
14.6667	0.001785
14.6833	0.001756
14.7	0.001576
14.7167	0.00131
14.7333	0.001333
14.75	0.001267
14.7667	0.00123
14.7833	0.001374
14.8	0.001276
14.8167	0.001
14.8333	0.000764
14.85	0.000489
14.8667	0.000283
14.8833	0.000167
14.9	-6e-05
14.9167	-0.000288
14.9333	-0.000486
14.95	-0.000684
14.9667	-0.000662
14.9833	-0.000769
15	-0.000638
15.0167	-0.000431
15.0333	-0.000584
15.05	-0.000856
15.0667	-0.001009
15.0833	-0.001052
15.1	-0.001325
15.1167	-0.001594
15.1333	-0.001683
15.15	-0.001652
15.1667	-0.0015
15.1833	-0.001599
15.2	-0.001829
15.2167	-0.001823
15.2333	-0.001607
15.25	-0.001421
15.2667	-0.001324
15.2833	-0.001108
15.3	-0.001163
15.3167	-0.001408
15.3333	-0.001542
15.35	-0.001257
15.3667	-0.000932
15.3833	-0.000777
15.4	-0.000622
15.4167	-0.00041
15.4333	1.1e-05
15.45	0.000252
15.4667	0.000573
15.4833	0.000974
15.5	0.001406
15.5167	0.001721
15.5333	0.001775
15.55	0.00192
15.5667	0.001945
15.5833	0.00201
15.6	0.001935
15.6167	0.001609
15.6333	0.001322
15.65	0.001336
15.6667	0.00125
15.6833	0.001244
15.7	0.001398
15.7167	0.001223
15.7333	0.000979
15.75	0.000614
15.7667	0.000909
15.7833	0.000934
15.8	0.0008
15.8167	0.000576
15.8333	0.000342
15.85	7.8e-05
15.8667	-0.000275
15.8833	-0.000539
15.9	-0.000473
15.9167	2.3e-05
15.9333	7e-05
15.95	-0.000754
15.9667	-0.001618
15.9833	-0.002192
16	-0.002616
16.0167	-0.001451
16.0333	-0.002126
16.05	-0.006942
16.0667	-0.016997
16.0833	-0.029422
16.1	-0.039797
16.1167	-0.043005
16.1333	-0.044112
16.15	-0.04283
16.1667	-0.040727
16.1833	-0.039215
16.2	-0.035992
16.2167	-0.032433
16.2333	-0.029723
16.25	-0.023714
16.2667	-0.021465
16.2833	-0.020866
16.3	-0.019406
16.3167	-0.018261
16.3333	-0.017706
16.35	-0.017721
16.3667	-0.017696
16.3833	-0.017781
16.4	-0.017596
16.4167	-0.017136
16.4333	-0.016736
16.45	-0.016526
16.4667	-0.016876
16.4833	-0.017576
16.5	-0.018006
16.5167	-0.017952
16.5333	-0.018418
16.55	-0.017304
16.5667	-0.012
16.5833	-0.009127
16.6	-0.008633
16.6167	-0.007896
16.6333	-0.007039
16.65	-0.006272
16.6667	-0.005635
16.6833	-0.005099
16.7	-0.004642
16.7167	-0.004063
16.7333	-0.003444
16.75	-0.003195
16.7667	-0.003007
16.7833	-0.002748
16.8	-0.002529
16.8167	-0.002239
16.8333	-0.001809
16.85	-0.001679
16.8667	-0.00151
16.8833	-0.0013
16.9	-0.00117
16.9167	-0.00122
16.9333	-0.00132
16.95	-0.00124
16.9667	-0.00119
16.9833	-0.00098
17	-0.00089
17.0167	-0.000911
17.0333	-0.000992
17.05	-0.001173
17.0667	-0.001424
17.0833	-0.001495
17.1	-0.001426
17.1167	-0.001318
17.1333	-0.001181
17.15	-0.000984
17.1667	-0.000996
17.1833	-0.001069
17.2	-0.001091
17.2167	-0.000945
17.2333	-0.000689
17.25	-0.000662
17.2667	-0.000706
17.2833	-0.00066
17.3	-0.000384
17.3167	-0.000126
17.3333	-9e-06
17.35	0.000129
17.3667	0.000216
17.3833	0.000473
17.4	0.000911
17.4167	0.000912
17.4333	0.000954
17.45	0.000885
17.4667	0.000697
17.4833	0.000668
17.5	0.00064
17.5167	0.000587
17.5333	0.000604
17.55	0.000752
17.5667	0.000829
17.5833	0.000857
17.6	0.000804
17.6167	0.000647
17.6333	0.000471
17.65	0.000105
17.6667	-1e-06
17.6833	2.3e-05
17.7	0.000176
17.7167	0.000345
17.7333	0.000325
17.75	0.000374
17.7667	0.000483
17.7833	0.000643
17.8	0.000772
17.8167	0.000746
17.8333	0.000519
17.85	0.000253
17.8667	4.7e-05
17.8833	-0.00029
17.9	-0.000486
17.9167	-0.000531
17.9333	-0.000745
17.95	-0.000699
17.9667	-0.000703
17.9833	-0.000488
18	-0.000382
18.0167	-0.000546
18.0333	-0.000759
18.05	-0.000903
18.0667	-0.000767
18.0833	-0.000781
18.1	-0.000965
18.1167	-0.000828
18.1333	-0.000342
18.15	-7.5e-05
18.1667	0.000181
18.1833	0.000407
18.2	0.000504
18.2167	0.000761
18.2333	0.001128
18.25	0.001025
18.2667	0.000792
18.2833	0.000529
18.3	0.000636
18.3167	0.000504
18.3333	0.000351
18.35	0.000339
18.3667	0.000417
18.3833	0.000294
18.4	-0.000188
18.4167	-0.000561
18.4333	-0.000764
18.45	-0.000977
18.4667	-0.001
18.4833	-0.000263
18.5	-0.000226
18.5167	-0.000521
18.5333	-0.001895
18.55	-0.00345
18.5667	-0.010685
18.5833	-0.01641
18.6	-0.020764
18.6167	-0.018281
18.6333	-0.015819
18.65	-0.012316
18.6667	-0.009414
18.6833	-0.007131
18.7	-0.006218
18.7167	-0.005859
18.7333	-0.005599
18.75	-0.00517
18.7667	-0.004661
18.7833	-0.003972
18.8	-0.003013
18.8167	-0.002257
18.8333	-0.001672
18.85	-0.001197
18.8667	-0.000792
18.8833	-0.000287
18.9	-8.2e-05
18.9167	0.000118
18.9333	0.000638
18.95	0.000858
18.9667	0.001118
18.9833	0.001718
19	0.002308
19.0167	0.002873
19.0333	0.003617
19.05	0.004341
19.0667	0.004605
19.0833	0.004539
19.1	0.004683
19.1167	0.005071
19.1333	0.004668
19.15	0.004606
19.1667	0.004503
19.1833	0.00461
19.2	0.004618
19.2167	0.004219
19.2333	0.003968
19.25	0.004018
19.2667	0.003708
19.2833	0.003358
19.3	0.002787
19.3167	0.0025
19.3333	0.002402
19.35	0.002223
19.3667	0.002025
19.3833	0.001946
19.4	0.001967
19.4167	0.001781
19.4333	0.001434
19.45	0.000946
19.4667	0.000408
19.4833	4e-05
19.5	-0.000167
19.5167	-0.000303
19.5333	-0.000411
19.55	-0.000649
19.5667	-0.000836
19.5833	-0.001004
19.6	-0.000902
19.6167	-0.000778
19.6333	-0.001065
19.65	-0.001493
19.6667	-0.001251
19.6833	-0.000579
19.7	-0.000237
19.7167	0.000208
19.7333	0.000292
19.75	0.000405
19.7667	0.000459
19.7833	0.001152
19.8	0.001606
19.8167	0.002144
19.8333	0.00247
19.85	0.002497
19.8667	0.001913
19.8833	0.0016
19.9	-0.000764
19.9167	-0.002593
19.9333	-0.002404
19.95	-0.001335
19.9667	-0.001436
19.9833	-0.001797
20	-0.002088
20.0167	-0.002085
20.0333	-0.001684
20.05	-0.001113
20.0667	-0.000591
20.0833	-0.00065
20.1	-0.000789
20.1167	-0.000522
20.1333	-0.000535
20.15	-0.000639
20.1667	-0.000883
20.1833	-0.000597
20.2	-0.00029
20.2167	-3.5e-05
20.2333	5.1e-05
20.25	0.000217
20.2667	0.000252
20.2833	0.000278
20.3	0.000154
20.3167	-0.000157
20.3333	-6.7e-05
20.35	0.000223
20.3667	0.000343
20.3833	0.000713
20.4	0.000893
20.4167	0.00105
20.4333	0.001219
20.45	0.001368
20.4667	0.001337
20.4833	0.001456
20.5	0.001695
20.5167	0.001553
20.5333	0.001274
20.55	0.001295
20.5667	0.001266
20.5833	0.001177
20.6	0.001468
20.6167	0.001627
20.6333	0.00131
20.65	0.000893
20.6667	0.000686
20.6833	0.000579
20.7	0.000632
20.7167	0.000642
20.7333	0.000585
20.75	0.000488
20.7667	0.000161
20.7833	-0.000107
20.8	-0.000404
20.8167	-0.000656
20.8333	-0.000487
20.85	-0.000298
20.8667	-0.000479
20.8833	-0.00051
20.9	-0.000451
20.9167	-0.000469
20.9333	-0.000737
20.95	-0.001215
20.9667	-0.001612
20.9833	-0.00097
21	0.001502
21.0167	0.001705
21.0333	-0.000341
21.05	-0.008797
21.0667	-0.017384
21.0833	-0.02272
21.1	-0.023177
21.1167	-0.017983
21.1333	-0.01488
21.15	-0.011677
21.1667	-0.004303
21.1833	0.00206
21.2	0.003654
21.2167	0.004626
21.2333	0.003768
21.25	0.00257
21.2667	0.001882
21.2833	0.001054
21.3	0.000486
21.3167	0.000346
21.3333	0.000165
21.35	4e-06
21.3667	-0.000436
21.3833	-0.000837
21.4	-0.000998
21.4167	-0.001162
21.4333	-0.000706
21.45	-0.000571
21.4667	-0.000546
21.4833	-0.000511
21.5	-0.000346
21.5167	0.000226
21.5333	0.000335
21.55	0.000475
21.5667	0.000765
21.5833	0.000835
21.6	0.001114
21.6167	0.0015
21.6333	0.001513
21.65	0.001326
21.6667	0.001199
21.6833	0.001052
21.7	0.000805
21.7167	0.000682
21.7333	0.000507
21.75	0.000272
21.7667	-9.3e-05
21.7833	-0.000188
21.8	-0.000273
21.8167	-0.000494
21.8333	-0.000979
21.85	-0.001313
21.8667	-0.001628
21.8833	-0.001752
21.9	-0.001657
21.9167	-0.001588
21.9333	-0.001553
21.95	-0.001547
21.9667	-0.001682
21.9833	-0.001757
22	-0.001981
22.0167	-0.001711
22.0333	-0.001373
22.05	-0.001225
22.0667	-0.000877
22.0833	-0.000579
22.1	-0.000131
22.1167	0.000465
22.1333	0.001041
22.15	0.001297
22.1667	0.000892
22.1833	0.000608
22.2	0.000684
22.2167	0.000842
22.2333	0.000921
22.25	0.00062
22.2667	0.000689
22.2833	0.000578
22.3	0.000347
22.3167	0.000881
22.3333	0.001197
22.35	0.001163
22.3667	0.00086
22.3833	0.000446
22.4	0.000852
22.4167	0.001205
22.4333	0.001491
22.45	0.001467
22.4667	0.001113
22.4833	0.000659
22.5	0.000505
22.5167	0.000527
22.5333	0.000543
22.55	0.000739
22.5667	0.000595
22.5833	0.000351
22.6	0.000178
22.6167	0.000439
22.6333	0.000354
22.65	0.000159
22.6667	1.4e-05
22.6833	-5.1e-05
22.7	-0.000326
22.7167	-0.000586
22.7333	-0.000564
22.75	-0.000262
22.7667	0.00018
22.7833	0.000533
22.8	0.000505
22.8167	0.000401
22.8333	9.8e-05
22.85	-0.000144
22.8667	-0.000116
22.8833	-1.8e-05
22.9	-0.00022
22.9167	-0.00049
22.9333	-0.000508
22.95	-0.000436
22.9667	-0.000214
22.9833	-0.000123
23	-0.000361
23.0167	-0.000717
23.0333	-0.000713
23.05	-0.000428
23.0667	-0.000484
23.0833	-0.00053
23.1	-0.000195
23.1167	0.000321
23.1333	0.000617
23.15	0.000774
23.1667	0.000741
23.1833	0.001047
23.2	0.000554
23.2167	9.1e-05
23.2333	-1e-05
23.25	0.000228
23.2667	0.000466
23.2833	0.000424
23.3	0.000622
23.3167	0.000521
23.3333	0.000289
23.35	5.7e-05
23.3667	-0.000145
23.3833	-0.000566
23.4	-0.000978
23.4167	-0.000821
23.4333	-0.000484
23.45	-0.000528
23.4667	-0.000472
23.4833	-0.001055
23.5	-0.001519
23.5167	-0.000904
23.5333	-0.000451
23.55	-0.004467
23.5667	-0.009304
23.5833	-0.01659
23.6	-0.016907
23.6167	-0.015536
23.6333	-0.008936
23.65	0.000103
23.6667	0.004853
23.6833	0.007352
23.7	0.008771
23.7167	0.009828
23.7333	0.010743
23.75	0.008648
23.7667	0.002582
23.7833	0.001247
23.8	0.000652
23.8167	-0.000317
23.8333	-0.000798
23.85	-0.000589
23.8667	-0.00022
23.8833	7.9e-05
23.9	2.8e-05
23.9167	0.000184
23.9333	0.000196
23.95	6.8e-05
23.9667	-5.9e-05
23.9833	0.000123
24	0.000276
24.0167	0.000444
24.0333	0.000659
24.05	0.001114
24.0667	0.001379
24.0833	0.001604
24.1	0.001729
24.1167	0.00149
24.1333	0.001216
24.15	0.000893
24.1667	0.00064
24.1833	0.000636
24.2	0.000923
24.2167	0.001105
24.2333	0.000593
24.25	-0.00052
24.2667	-0.002842
24.2833	-0.005655
24.3	-0.005618
24.3167	-0.004995
24.3333	-0.004008
24.35	-0.00363
24.3667	-0.003293
24.3833	-0.003025
24.4	-0.002818
24.4167	-0.002815
24.4333	-0.002478
24.45	-0.002081
24.4667	-0.001734
24.4833	-0.001257
24.5	-0.000839
24.5167	-0.000526
24.5333	-0.000115
24.55	6.5e-05
24.5667	0.000105
24.5833	0.000295
24.6	0.000825
24.6167	0.001294
24.6333	0.001552
24.65	0.00193
24.6667	0.001737
24.6833	0.001575
24.7	0.001573
24.7167	0.001861
24.7333	0.001949
24.75	0.002257
24.7667	0.002485
24.7833	0.002364
24.8	0.002032
24.8167	0.00117
24.8333	0.000898
24.85	0.000596
24.8667	0.000294
24.8833	-0.000298
24.9	-0.00059
24.9167	-0.000674
24.9333	-0.000769
24.95	-0.000895
24.9667	-0.0012
24.9833	-0.001146
25	-0.001032
25.0167	-0.00116
25.0333	-0.000922
25.05	-0.000714
25.0667	-0.000466
25.0833	-0.000598
25.1	-0.00045
25.1167	-0.000375
25.1333	-0.000114
25.15	0.000287
25.1667	0.000428
25.1833	0.000269
25.2	6.9e-05
25.2167	-0.000213
25.2333	-0.00018
25.25	-0.000117
25.2667	-0.000194
25.2833	-0.000321
25.3	-0.000348
25.3167	-0.000278
25.3333	-0.000423
25.35	-0.000718
25.3667	-0.000952
25.3833	-0.000957
25.4	-0.000972
25.4167	-0.00111
25.4333	-0.001382
25.45	-0.001664
25.4667	-0.001616
25.4833	-0.001598
25.5	-0.00161
25.5167	-0.001594
25.5333	-0.001431
25.55	-0.001137
25.5667	-0.000914
25.5833	-0.00068
25.6	-0.000387
25.6167	5.7e-05
25.6333	0.000252
25.65	0.000287
25.6667	0.000441
25.6833	0.000966
25.7	0.00135
25.7167	0.001988
25.7333	0.00167
25.75	0.001321
25.7667	0.001423
25.7833	0.001395
25.8	0.001236
25.8167	0.001262
25.8333	0.001284
25.85	0.001397
25.8667	0.001469
25.8833	0.001281
25.9	0.000654
25.9167	0.000401
25.9333	0.000475
25.95	0.000959
25.9667	0.001213
25.9833	0.001637
26	0.002511
26.0167	0.001909
26.0333	-0.002756
26.05	-0.007051
26.0667	-0.010976
26.0833	-0.013761
26.1	-0.013096
26.1167	-0.013777
26.1333	-0.011042
26.15	-0.007867
26.1667	-0.004702
26.1833	-0.002047
26.2	-0.000292
26.2167	0.000606
26.2333	0.00036
26.25	0.001543
26.2667	0.002077
26.2833	0.001661
26.3	1.4e-05
26.3167	-0.002529
26.3333	-0.004318
26.35	-0.004817
26.3667	-0.004766
26.3833	-0.004434
26.4	-0.005333
26.4167	-0.005
26.4333	-0.004602
26.45	-0.004594
26.4667	-0.004077
26.4833	-0.003099
26.5	-0.003202
26.5167	-0.003322
26.5333	-0.00308
26.55	-0.003137
26.5667	-0.003124
26.5833	-0.002801
26.6	-0.002628
26.6167	-0.002364
26.6333	-0.002347
26.65	-0.002261
26.6667	-0.002304
26.6833	-0.002057
26.7	-0.00152
26.7167	-0.001413
26.7333	-0.000903
26.75	-0.000533
26.7667	-0.000224
26.7833	6.6e-05
26.8	9.5e-05
26.8167	0.000316
26.8333	0.000627
26.85	0.000708
26.8667	0.00093
26.8833	0.001581
26.9	0.002022
26.9167	0.002324
26.9333	0.002495
26.95	0.002507
26.9667	0.002319
26.9833	0.001961
27	0.001482
27.0167	0.001134
27.0333	0.000865
27.05	0.000466
27.0667	0.000357
27.0833	0.000448
27.1	0.000349
27.1167	0.00022
27.1333	0.000139
27.15	-2.2e-05
27.1667	1.7e-05
27.1833	0.000136
27.2	-0.000215
27.2167	-0.000707
27.2333	-0.000711
27.25	-0.000566
27.2667	-0.00056
27.2833	-0.000485
27.3	-0.000479
27.3167	-0.000495
27.3333	-0.000324
27.35	-0.000223
27.3667	9.8e-05
27.3833	8.9e-05
27.4	0.00017
27.4167	0.000289
27.4333	0.000235
27.45	-5.9e-05
27.4667	-0.000153
27.4833	-0.000357
27.5	-0.000781
27.5167	-0.000816
27.5333	-0.000685
27.55	-0.000684
27.5667	-0.000723
27.5833	-0.000732
27.6	-0.000451
27.6167	-0.000211
27.6333	-0.000145
27.65	-0.000258
27.6667	-0.000311
27.6833	-0.000244
27.7	4.2e-05
27.7167	-4.2e-05
27.7333	3.2e-05
27.75	8.6e-05
27.7667	0.00028
27.7833	-6.6e-05
27.8	0.000118
27.8167	0.000212
27.8333	-0.000125
27.85	-0.000252
27.8667	-8.9e-05
27.8833	-6e-06
27.9	0.000186
27.9167	0.0005
27.9333	0.000553
27.95	0.000437
27.9667	0.00047
27.9833	0.000204
28	0.000237
28.0167	0.000271
28.0333	0.000386
28.05	0.000572
28.0667	0.000587
28.0833	0.000722
28.1	0.000867
28.1167	0.001093
28.1333	0.00125
28.15	0.001258
28.1667	0.001105
28.1833	0.000872
28.2	0.000639
28.2167	0.000526
28.2333	0.000384
28.25	9.2e-05
28.2667	-0.0002
28.2833	-0.000393
28.3	-0.000505
28.3167	-0.000708
28.3333	-0.000722
28.35	-0.000796
28.3667	-0.00087
28.3833	-0.000935
28.4	-0.000999
28.4167	-0.001274
28.4333	-0.001281
28.45	-0.001189
28.4667	-0.001396
28.4833	-0.001104
28.5	-0.000391
28.5167	0.00023
28.5333	0.00084
28.55	-0.002891
28.5667	-0.006791
28.5833	-0.009462
28.6	-0.012272
28.6167	-0.013523
28.6333	-0.009285
28.65	-0.001128
28.6667	0.00211
28.6833	0.004718
28.7	0.007745
28.7167	0.008993
28.7333	0.0087
28.75	0.007666
28.7667	0.006753
28.7833	0.0067
28.8	0.006357
28.8167	0.005834
28.8333	0.004411
28.85	0.003328
28.8667	0.001825
28.8833	0.000412
28.9	-0.000721
28.9167	-0.000744
28.9333	-0.000366
28.95	-0.000207
28.9667	-0.000289
28.9833	-0.000411
29	-0.000332
29.0167	-0.000253
29.0333	-0.000603
29.05	-0.000822
29.0667	-0.001081
29.0833	-0.001181
29.1	-0.00084
29.1167	-0.000639
29.1333	-0.000685
29.15	-0.000901
29.1667	-0.001286
29.1833	-0.001542
29.2	-0.001458
29.2167	-0.001623
29.2333	-0.001635
29.25	-0.001846
29.2667	-0.002208
29.2833	-0.002209
29.3	-0.002081
29.3167	-0.001841
29.3333	-0.001707
29.35	-0.001463
29.3667	-0.001269
29.3833	-0.001235
29.4	-0.00107
29.4167	-0.000855
29.4333	-0.000824
29.45	-0.000684
29.4667	-0.000433
29.4833	-0.000152
29.5	-1.2e-05
29.5167	9e-05
29.5333	0.000119
29.55	0.000387
29.5667	0.000606
29.5833	0.000724
29.6	0.000932
29.6167	0.001032
29.6333	0.001129
29.65	0.001245
29.6667	0.001342
29.6833	0.001308
29.7	0.001415
29.7167	0.001633
29.7333	0.001616
29.75	0.0014
29.7667	0.001273
29.7833	0.001007
29.8	0.00072
29.8167	0.000504
29.8333	0.000331
29.85	4.8e-05
29.8667	-0.000136
29.8833	-0.000369
29.9	-0.000362
29.9167	-0.000646
29.9333	-0.000781
29.95	-0.000736
29.9667	-0.000701
29.9833	-0.000877
30	-0.001092
30.0167	-0.001438
30.0333	-0.001559
30.05	-0.00176
30.0667	-0.001671
30.0833	-0.001582
30.1	-0.001493
30.1167	-0.001125
30.1333	-0.000713
30.15	-0.000521
30.1667	-0.00078
30.1833	-0.000778
30.2	-0.000577
30.2167	-0.000516
30.2333	-0.000621
30.25	-0.000596
30.2667	-0.000491
30.2833	-0.000716
30.3	-0.000921
30.3167	-0.000887
30.3333	-0.000627
30.35	-0.000156
30.3667	4e-06
30.3833	7.4e-05
30.4	0.000224
30.4167	0.000465
30.4333	0.000783
30.45	0.000852
30.4667	0.00081
30.4833	0.000969
30.5	0.000887
30.5167	0.001036
30.5333	0.000955
30.55	0.000634
30.5667	0.000513
30.5833	0.000643
30.6	0.000892
30.6167	0.001251
30.6333	0.001351
30.65	0.001181
30.6667	0.000932
30.6833	0.000832
30.7	0.000812
30.7167	0.000772
30.7333	0.000572
30.75	0.000362
30.7667	-8e-06
30.7833	-0.000298
30.8	-0.000498
30.8167	-0.000558
30.8333	-0.000681
30.85	-0.000733
30.8667	-0.000746
30.8833	-0.000729
30.9	-0.001241
30.9167	-0.001704
30.9333	-0.001971
30.95	-0.002188
30.9667	-0.002075
30.9833	-0.001882
31	-0.002228
31.0167	-0.002625
31.0333	-0.002546
31.05	-0.003346
31.0667	-0.007306
31.0833	-0.015186
31.1	-0.015247
31.1167	-0.009237
31.1333	-0.002919
31.15	-0.001121
31.1667	0.003537
31.1833	0.006155
31.2	0.007403
31.2167	0.007492
31.2333	0.00629
31.25	0.005958
31.2667	0.005906
31.2833	0.004804
31.3	0.002902
31.3167	0.001561
31.3333	0.001371
31.35	0.001501
31.3667	0.001511
31.3833	0.001631
31.4	0.00127
31.4167	0.001071
31.4333	0.001134
31.45	0.001028
31.4667	0.000851
31.4833	0.000935
31.5	0.001078
31.5167	0.001292
31.5333	0.001651
31.55	0.00206
31.5667	0.002229
31.5833	0.002128
31.6	0.002137
31.6167	0.002076
31.6333	0.002092
31.65	0.002037
31.6667	0.002013
31.6833	0.001789
31.7	0.001564
31.7167	0.00138
31.7333	0.001222
31.75	0.001034
31.7667	0.000806
31.7833	0.000768
31.8	0.00083
31.8167	0.000792
31.8333	0.000677
31.85	0.000572
31.8667	0.000167
31.8833	-7.8e-05
31.9	-0.000203
31.9167	-0.000358
31.9333	-0.000475
31.95	-0.000512
31.9667	-0.000429
31.9833	-0.000455
32	-0.000532
32.0167	-0.000399
32.0333	-0.000252
32.05	-0.000415
32.0667	-0.000747
32.0833	-0.00095
32.1	-0.000993
32.1167	-0.001066
32.1333	-0.001298
32.15	-0.00139
32.1667	-0.001422
32.1833	-0.001734
32.2	-0.002075
32.2167	-0.002567
32.2333	-0.002429
32.25	-0.002001
32.2667	-0.001913
32.2833	-0.001815
32.3	-0.001407
32.3167	-0.001119
32.3333	-0.000959
32.35	-0.000988
32.3667	-0.000937
32.3833	-0.000566
32.4	7.5e-05
32.4167	0.000375
32.4333	0.000674
32.45	0.000963
32.4667	0.001012
32.4833	0.001031
32.5	0.00109
32.5167	0.001349
32.5333	0.00137
32.55	0.001162
32.5667	0.001264
32.5833	0.001196
32.6	0.001218
32.6167	0.00099
32.6333	0.000747
32.65	0.000535
32.6667	0.000522
32.6833	0.00055
32.7	0.000327
32.7167	-3.5e-05
32.7333	-0.000171
32.75	-4.7e-05
32.7667	0.000108
32.7833	0.000152
32.8	0.000236
32.8167	0.000371
32.8333	0.000412
32.85	0.000464
32.8667	0.000375
32.8833	0.000497
32.9	0.000398
32.9167	0.00018
32.9333	0.000118
32.95	0.000237
32.9667	0.000406
32.9833	0.000604
33	0.000833
33.0167	0.000782
33.0333	0.000966
33.05	0.001091
33.0667	0.000896
33.0833	0.000651
33.1	0.000326
33.1167	0.000311
33.1333	0.00012
33.15	-0.000161
33.1667	-0.000243
33.1833	1.6e-05
33.2	4.5e-05
33.2167	-0.000176
33.2333	-0.000506
33.25	-0.000515
33.2667	-0.000435
33.2833	-0.000255
33.3	-0.000435
33.3167	-0.000595
33.3333	-0.000695
33.35	-0.000946
33.3667	-0.000937
[truncated: 910 more rows]
