# Supplementary material for: NirD curtails the stringent response by inhibiting RelA activity in Escherichia coli
Source: eLife. 2021 Jul 29;10:e64092. doi: 10.7554/eLife.64092 (PMC8321558; doi:10.7554/eLife.64092)
Supplement: Figure 5—source data 3. [file elife-64092-fig5-data3.xlsx]

## Sheet: Figure 5–source data 3
Figure 5–source data 3. Raw data for ITC experiment run with NirDE50K
Time (minutes)	DP (µcal/s)		Molar Ratio	ΔH (kcal/mol)
0.083333	-0.002184		0.114999	-0.858965
0.1	-0.001174		0.21183	-0.766387
0.116667	-0.000804		0.30957	-0.66749
0.133333	-0.000684		0.408218	-0.785179
0.15	-0.000644		0.507774	-0.637479
0.166667	-0.000524		0.608237	-0.93972
0.183333	-0.000294		0.709609	-0.517674
0.2	-7.4e-05		0.811889	-0.67745
0.216667	-0.000113		0.915077	0.941536
0.233333	-0.000153		1.01917	0.354723
0.25	-0.000222		1.12418	-0.31074
0.266667	-7.2e-05		1.23009	-0.113542
0.283333	0.000259		1.33691	-0.843782
0.3	0.000631		1.44463	-0.261993
0.316667	0.001053		1.55327	-0.313732
0.333333	0.001255		1.66281	-0.226342
0.35	0.001388		1.77327	-0.361096
0.366667	0.00161		1.88462	-0.159923
0.383333	0.001642
0.4	0.001556
0.416667	0.001761
0.433333	0.001805
0.45	0.001809
0.466667	0.001854
0.483333	0.001998
0.5	0.002134
0.516667	0.00215
0.533333	0.001955
0.55	0.001591
0.566667	0.001177
0.583333	0.000973
0.6	0.000667
0.616667	0.000302
0.633333	-0.000183
0.65	-0.000599
0.666667	-0.000884
0.683333	-0.000979
0.7	-0.001099
0.716667	-0.001109
0.733333	-0.001158
0.75	-0.001418
0.766667	-0.001598
0.783333	-0.001798
0.8	-0.001794
0.816667	-0.001731
0.833333	-0.001967
0.85	-0.001914
0.866667	-0.001661
0.883333	-0.001357
0.9	-0.000882
0.916667	-4.6e-05
0.933333	0.000309
0.95	-0.000356
0.966667	-0.0008
0.983333	-0.000935
1	-0.000528
1.01667	0.005649
1.03333	0.005367
1.05	0.002144
1.06667	0.000261
1.08333	-9.2e-05
1.1	-0.000523
1.11667	-0.001004
1.13333	-0.000305
1.15	0.000684
1.16667	0.001553
1.18333	0.001772
1.2	0.001294
1.21667	0.001505
1.23333	0.001816
1.25	0.001788
1.26667	0.001799
1.28333	0.00206
1.3	0.002374
1.31667	0.002177
1.33333	0.002481
1.35	0.003054
1.36667	0.003878
1.38333	0.004802
1.4	0.005298
1.41667	0.005444
1.43333	0.00551
1.45	0.005386
1.46667	0.004982
1.48333	0.004618
1.5	0.004638
1.51667	0.004247
1.53333	0.003935
1.55	0.003774
1.56667	0.003623
1.58333	0.003702
1.6	0.003984
1.61667	0.004276
1.63333	0.004778
1.65	0.005299
1.66667	0.005351
1.68333	0.005123
1.7	0.004628
1.71667	0.004363
1.73333	0.004608
1.75	0.004553
1.76667	0.004658
1.78333	0.004902
1.8	0.005451
1.81667	0.00616
1.83333	0.006808
1.85	0.007256
1.86667	0.007724
1.88333	0.008412
1.9	0.009255
1.91667	0.010036
1.93333	0.010648
1.95	0.01101
1.96667	0.011041
1.98333	0.010903
2	0.011039
2.01667	0.011205
2.03333	0.01149
2.05	0.011486
2.06667	0.010001
2.08333	0.009156
2.1	0.008427
2.11667	0.007246
2.13333	0.006475
2.15	0.005555
2.16667	0.002894
2.18333	-8.7e-05
2.2	-0.002083
2.21667	-0.001659
2.23333	0.000204
2.25	0.002658
2.26667	0.003991
2.28333	0.003685
2.3	0.004143
2.31667	0.005411
2.33333	0.006009
2.35	0.006277
2.36667	0.006944
2.38333	0.009072
2.4	0.010435
2.41667	0.010607
2.43333	0.01039
2.45	0.010462
2.46667	0.010974
2.48333	0.011227
2.5	0.011394
2.51667	0.011571
2.53333	0.011608
2.55	0.011595
2.56667	0.011792
2.58333	0.012409
2.6	0.013022
2.61667	0.013714
2.63333	0.014436
2.65	0.014948
2.66667	0.015419
2.68333	0.015411
2.7	0.015519
2.71667	0.015866
2.73333	0.016023
2.75	0.01621
2.76667	0.016147
2.78333	0.015784
2.8	0.015457
2.81667	0.015379
2.83333	0.014732
2.85	0.014304
2.86667	0.013806
2.88333	0.013008
2.9	0.011907
2.91667	0.010965
2.93333	0.010863
2.95	0.0102
2.96667	0.009098
2.98333	0.008106
3	0.00716
3.01667	0.006234
3.03333	0.005197
3.05	0.00405
3.06667	0.003284
3.08333	0.003177
3.1	0.002697
3.11667	0.002917
3.13333	0.002896
3.15	0.002736
3.16667	0.002535
3.18333	0.002014
3.2	0.00155
3.21667	0.000606
3.23333	0.000391
3.25	0.000727
3.26667	0.000622
3.28333	0.000618
3.3	0.00068
3.31667	0.000622
3.33333	0.000573
3.35	0.000695
3.36667	0.001247
3.38333	0.001219
3.4	0.000727
3.41667	0.000545
3.43333	-4.6e-05
3.45	-0.001008
3.46667	-0.00184
3.48333	-0.002402
3.5	-0.003917
3.51667	-0.001973
3.53333	-0.001749
3.55	-0.009974
3.56667	-0.02451
3.58333	-0.039476
3.6	-0.045935
3.61667	-0.045815
3.63333	-0.043165
3.65	-0.039574
3.66667	-0.035754
3.68333	-0.031934
3.7	-0.029677
3.71667	-0.027301
3.73333	-0.024035
3.75	-0.0215
3.76667	-0.018914
3.78333	-0.016898
3.8	-0.014795
3.81667	-0.011924
3.83333	-0.009543
3.85	-0.007891
3.86667	-0.0065
3.88333	-0.005828
3.9	-0.005101
3.91667	-0.004194
3.93333	-0.003687
3.95	-0.003181
3.96667	-0.002444
3.98333	-0.001627
4	-0.001234
4.01667	-0.000833
4.03333	-0.000401
4.05	-0.000249
4.06667	0.000212
4.08333	0.001434
4.1	0.001682
4.11667	0.001508
4.13333	0.001755
4.15	0.001902
4.16667	0.002438
4.18333	0.003185
4.2	0.004437
4.21667	0.006868
4.23333	0.01008
4.25	0.012021
4.26667	-0.002038
4.28333	-0.006157
4.3	-0.00467
4.31667	-0.002854
4.33333	-0.001779
4.35	-0.001313
4.36667	-0.000978
4.38333	0.000238
4.4	0.000699
4.41667	0.000149
4.43333	-0.000421
4.45	-9.2e-05
4.46667	0.000378
4.48333	0.000448
4.5	0.000343
4.51667	0.000167
4.53333	0.000121
4.55	0.000164
4.56667	9.8e-05
4.58333	5.2e-05
4.6	0.000211
4.61667	0.000359
4.63333	0.000326
4.65	-0.000197
4.66667	-0.000719
4.68333	-0.001042
4.7	-0.001239
4.71667	-0.001198
4.73333	-0.000967
4.75	-0.000666
4.76667	-0.000314
4.78333	-0.000183
4.8	-2.6e-05
4.81667	-0.000251
4.83333	-0.000486
4.85	-0.000751
4.86667	-0.000696
4.88333	-0.000601
4.9	-0.000729
4.91667	-0.000829
4.93333	-0.001159
4.95	-0.001319
4.96667	-0.001519
4.98333	-0.001519
5	-0.001321
5.01667	-0.001074
5.03333	-0.001197
5.05	-0.00131
5.06667	-0.001374
5.08333	-0.001457
5.1	-0.00148
5.11667	-0.001284
5.13333	-0.001258
5.15	-0.000982
5.16667	-0.000785
5.18333	-0.000739
5.2	-0.000671
5.21667	-0.000861
5.23333	-0.000981
5.25	-0.000871
5.26667	-0.000682
5.28333	-0.000522
5.3	-0.000157
5.31667	0.000271
5.33333	0.000359
5.35	0.000537
5.36667	0.000965
5.38333	0.001473
5.4	0.001969
5.41667	0.002301
5.43333	0.002592
5.45	0.002563
5.46667	0.002714
5.48333	0.002965
5.5	0.003017
5.51667	0.003045
5.53333	0.002902
5.55	0.00323
5.56667	0.003378
5.58333	0.003326
5.6	0.003385
5.61667	0.003571
5.63333	0.003686
5.65	0.003751
5.66667	0.003617
5.68333	0.003202
5.7	0.002768
5.71667	0.002329
5.73333	0.00168
5.75	0.001141
5.76667	0.000592
5.78333	8.3e-05
5.8	-0.000539
5.81667	-0.000927
5.83333	-0.001275
5.85	-0.001803
5.86667	-0.001991
5.88333	-0.002279
5.9	-0.003203
5.91667	-0.004794
5.93333	-0.005895
5.95	-0.006567
5.96667	-0.006878
5.98333	-0.007079
6	-0.007288
6.01667	-0.007224
6.03333	-0.006811
6.05	-0.013418
6.06667	-0.028695
6.08333	-0.042771
6.1	-0.046416
6.11667	-0.044909
6.13333	-0.039831
6.15	-0.035964
6.16667	-0.031037
6.18333	-0.02517
6.2	-0.020431
6.21667	-0.016311
6.23333	-0.01405
6.25	-0.01213
6.26667	-0.01113
6.28333	-0.010579
6.3	-0.009668
6.31667	-0.007635
6.33333	-0.006142
6.35	-0.005089
6.36667	-0.004376
6.38333	-0.003583
6.4	-0.002929
6.41667	-0.002304
6.43333	-0.001949
6.45	-0.001724
6.46667	-0.001469
6.48333	-0.000864
6.5	-0.000289
6.51667	-0.000202
6.53333	1.4e-05
6.55	0.00068
6.56667	0.000866
6.58333	0.000982
6.6	0.001029
6.61667	0.001166
6.63333	0.001423
6.65	0.00175
6.66667	0.001987
6.68333	0.002053
6.7	0.00219
6.71667	0.002327
6.73333	0.002244
6.75	0.002121
6.76667	0.001938
6.78333	0.001815
6.8	0.001672
6.81667	0.001538
6.83333	0.001344
6.85	0.00105
6.86667	0.000856
6.88333	0.000583
6.9	7.7e-05
6.91667	-0.000239
6.93333	-0.000386
6.95	-0.000522
6.96667	-0.000588
6.98333	-0.000545
7	-0.000474
7.01667	-0.000455
7.03333	-0.000436
7.05	-0.000947
7.06667	-0.001378
7.08333	-0.001829
7.1	-0.002183
7.11667	-0.002521
7.13333	-0.003058
7.15	-0.003955
7.16667	-0.004523
7.18333	-0.00457
7.2	-0.00434
7.21667	-0.003784
7.23333	-0.003147
7.25	-0.00243
7.26667	-0.001553
7.28333	-0.000826
7.3	-0.000281
7.31667	-1.6e-05
7.33333	7.8e-05
7.35	0.000293
7.36667	0.000687
7.38333	0.001131
7.4	0.001517
7.41667	0.001903
7.43333	0.00247
7.45	0.003116
7.46667	0.003212
7.48333	0.003288
7.5	0.003408
7.51667	0.003499
7.53333	0.00348
7.55	0.003412
7.56667	0.003293
7.58333	0.003064
7.6	0.002858
7.61667	0.002585
7.63333	0.002452
7.65	0.002629
7.66667	0.002745
7.68333	0.002532
7.7	0.002371
7.71667	0.00209
7.73333	0.00174
7.75	0.00122
7.76667	0.000629
7.78333	7.9e-05
7.8	-0.000442
7.81667	-0.000793
7.83333	-0.000895
7.85	-0.001006
7.86667	-0.001158
7.88333	-0.00121
7.9	-0.001484
7.91667	-0.001641
7.93333	-0.001769
7.95	-0.001966
7.96667	-0.002303
7.98333	-0.002671
8	-0.002653
8.01667	-0.003019
8.03333	-0.003505
8.05	-0.003861
8.06667	-0.004077
8.08333	-0.004224
8.1	-0.004215
8.11667	-0.003961
8.13333	-0.003526
8.15	-0.003082
8.16667	-0.003108
8.18333	-0.003264
8.2	-0.003823
8.21667	-0.003875
8.23333	-0.005238
8.25	-0.006161
8.26667	-0.007043
8.28333	-0.006816
8.3	-0.005978
8.31667	-0.005441
8.33333	-0.007674
8.35	-0.010146
8.36667	0.002881
8.38333	0.015328
8.4	0.020571
8.41667	0.021448
8.43333	0.020436
8.45	0.018514
8.46667	0.017421
8.48333	0.014839
8.5	0.010703
8.51667	0.006355
8.53333	0.002276
8.55	-0.006062
8.56667	-0.020221
8.58333	-0.031289
8.6	-0.044952
8.61667	-0.043777
8.63333	-0.038293
8.65	-0.033269
8.66667	-0.028315
8.68333	-0.023831
8.7	-0.020591
8.71667	-0.018116
8.73333	-0.016031
8.75	-0.014275
8.76667	-0.01275
8.78333	-0.010375
8.8	-0.008415
8.81667	-0.006849
8.83333	-0.005714
8.85	-0.004609
8.86667	-0.003994
8.88333	-0.003249
8.9	-0.00287
8.91667	-0.002466
8.93333	-0.002102
8.95	-0.001889
8.96667	-0.001775
8.98333	-0.001681
9	-0.001625
9.01667	-0.001444
9.03333	-0.001493
9.05	-0.001642
9.06667	-0.002202
9.08333	-0.002531
9.1	-0.002938
9.11667	-0.003221
9.13333	-0.003205
9.15	-0.002729
9.16667	-0.002462
9.18333	-0.002526
9.2	-0.002108
9.21667	-0.001867
9.23333	-0.001727
9.25	-0.001676
9.26667	-0.001485
9.28333	-0.001875
9.3	-0.001793
9.31667	-0.001089
9.33333	-0.000956
9.35	-0.000492
9.36667	0.000591
9.38333	0.000325
9.4	0.000329
9.41667	0.000514
9.43333	8.9e-05
9.45	0.000134
9.46667	-3.1e-05
9.48333	-0.000586
9.5	-0.000501
9.51667	-0.000686
9.53333	-0.000741
9.55	-0.000806
9.56667	-0.000841
9.58333	-0.001036
9.6	-0.001191
9.61667	-0.001677
9.63333	-0.001934
9.65	-0.00173
9.66667	-0.001486
9.68333	-0.001272
9.7	-0.00136
9.71667	-0.001478
9.73333	-0.001247
9.75	-0.001276
9.76667	-0.001435
9.78333	-0.001404
9.8	-0.001284
9.81667	-0.000956
9.83333	-0.000787
9.85	-0.000779
9.86667	-0.000471
9.88333	-0.000193
9.9	-0.000196
9.91667	-0.000371
9.93333	-0.000485
9.95	-0.00032
9.96667	-0.000135
9.98333	-7.9e-05
10	-0.000155
10.0167	-0.000101
10.0333	-0.000147
10.05	-4e-06
10.0667	6e-05
10.0833	8.4e-05
10.1	4.7e-05
10.1167	0.00025
10.1333	0.000643
10.15	0.001085
10.1667	0.001128
10.1833	0.001201
10.2	0.001384
10.2167	0.001347
10.2333	0.00144
10.25	0.001642
10.2667	0.001735
10.2833	0.001588
10.3	0.001431
10.3167	0.001363
10.3333	0.001255
10.35	0.001318
10.3667	0.00149
10.3833	0.001503
10.4	0.001174
10.4167	0.000475
10.4333	-0.000145
10.45	-0.000625
10.4667	-0.001524
10.4833	-0.002544
10.5	-0.003045
10.5167	-0.003349
10.5333	-0.002873
10.55	-0.002867
10.5667	-0.00339
10.5833	-0.004374
10.6	-0.005
10.6167	-0.004528
10.6333	-0.000126
10.65	0.001916
10.6667	0.002017
10.6833	0.002069
10.7	0.00209
10.7167	0.003049
10.7333	0.004788
10.75	0.005597
10.7667	0.005046
10.7833	0.003946
10.8	0.002524
10.8167	0.0021
10.8333	0.002137
10.85	0.002043
10.8667	0.001569
10.8833	-0.001514
10.9	-0.003379
10.9167	-0.005378
10.9333	-0.007037
10.95	-0.010036
10.9667	-0.010485
10.9833	-0.011154
11	-0.010974
11.0167	-0.007119
11.0333	-0.001235
11.05	-0.00572
11.0667	-0.019735
11.0833	-0.02987
11.1	-0.035137
11.1167	-0.034887
11.1333	-0.033368
11.15	-0.029439
11.1667	-0.02066
11.1833	-0.01404
11.2	-0.009693
11.2167	-0.006969
11.2333	-0.006324
11.25	-0.00717
11.2667	-0.005716
11.2833	-0.005162
11.3	-0.006819
11.3167	-0.010589
11.3333	-0.01739
11.35	-0.02378
11.3667	-0.02589
11.3833	-0.028
11.4	-0.022302
11.4167	-0.011516
11.4333	-0.00408
11.45	-0.000864
11.4667	0.002002
11.4833	0.004248
11.5	0.004293
11.5167	0.003495
11.5333	0.002728
11.55	0.002721
11.5667	0.003243
11.5833	0.002806
11.6	0.002088
11.6167	0.001598
11.6333	0.001298
11.65	0.000738
11.6667	0.000108
11.6833	-0.000611
11.7	-0.001222
11.7167	-0.001654
11.7333	-0.001886
11.75	-0.001658
11.7667	-0.001279
11.7833	-0.001061
11.8	-0.001003
11.8167	-0.001097
11.8333	-0.0013
11.85	-0.001433
11.8667	-0.001636
11.8833	-0.001499
11.9	-0.001243
11.9167	-0.000967
11.9333	-0.000811
11.95	-0.000265
11.9667	0.000401
11.9833	0.000878
12	0.000964
12.0167	0.00113
12.0333	0.000796
12.05	-0.000108
12.0667	-0.000862
12.0833	-0.001586
12.1	-0.00227
12.1167	-0.002354
12.1333	-0.002057
12.15	-0.001771
12.1667	-0.001924
12.1833	-0.001978
12.2	-0.001191
12.2167	-0.000763
12.2333	-0.001336
12.25	-0.001588
12.2667	-0.001411
12.2833	-0.001183
12.3	-0.001255
12.3167	-0.001165
12.3333	-0.000546
12.35	0.000263
12.3667	0.000613
12.3833	0.001002
12.4	0.001582
12.4167	0.001564
12.4333	0.001506
12.45	0.001348
12.4667	0.000759
12.4833	9.1e-05
12.5	-0.000696
12.5167	-0.001252
12.5333	-0.001247
12.55	-0.000992
12.5667	-0.000777
12.5833	-0.000422
12.6	0.000243
12.6167	4.2e-05
12.6333	-0.00042
12.65	-0.000762
12.6667	-0.000703
12.6833	-0.000775
12.7	-0.001105
12.7167	-0.001243
12.7333	-0.00117
12.75	-0.000587
12.7667	0.000265
12.7833	0.000868
12.8	0.001252
12.8167	0.00151
12.8333	0.001807
12.85	0.001845
12.8667	0.001533
12.8833	0.000811
12.9	0.000379
12.9167	0.000642
12.9333	0.000755
12.95	0.000658
12.9667	0.000641
12.9833	0.000684
13	0.000678
13.0167	0.000436
13.0333	5.3e-05
13.05	-0.000239
13.0667	-0.000152
13.0833	-0.000154
13.1	-0.000216
13.1167	-0.000385
13.1333	-0.000484
13.15	-0.000593
13.1667	-0.000362
13.1833	-0.000381
13.2	-6e-05
13.2167	0.000423
13.2333	0.000697
13.25	0.00071
13.2667	0.000684
13.2833	0.000607
13.3	0.000921
13.3167	0.000796
13.3333	0.000531
13.35	8.6e-05
13.3667	-7e-05
13.3833	-0.000485
13.4	-0.00077
13.4167	-0.001225
13.4333	-0.00206
13.45	-0.002415
13.4667	-0.00256
13.4833	-0.002785
13.5	-0.00247
13.5167	-0.004145
13.5333	-0.004611
13.55	-0.010427
13.5667	-0.022143
13.5833	-0.033768
13.6	-0.040374
13.6167	-0.039351
13.6333	-0.035938
13.65	-0.031125
13.6667	-0.027552
13.6833	-0.022279
13.7	-0.018866
13.7167	-0.016285
13.7333	-0.014274
13.75	-0.012583
13.7667	-0.010631
13.7833	-0.00889
13.8	-0.007739
13.8167	-0.00672
13.8333	-0.005131
13.85	-0.003492
13.8667	-0.002653
13.8833	-0.002304
13.9	-0.002045
13.9167	-0.001539
13.9333	-0.000783
13.95	-0.000296
13.9667	5e-05
13.9833	0.000426
14	0.000742
14.0167	0.000805
14.0333	0.000709
14.05	0.000372
14.0667	0.000285
14.0833	0.000378
14.1	0.000301
14.1167	0.0002
14.1333	0.00037
14.15	0.000639
14.1667	0.000749
14.1833	0.000798
14.2	0.000677
14.2167	0.000612
14.2333	0.000798
14.25	0.000683
14.2667	0.000548
14.2833	0.000634
14.3	0.000608
14.3167	0.000709
14.3333	0.00074
14.35	0.00064
14.3667	0.000441
14.3833	0.000202
14.4	-7.8e-05
14.4167	-0.000163
14.4333	-1.7e-05
14.45	0.000168
14.4667	0.000104
14.4833	-0.000161
14.5	-0.000176
14.5167	2.4e-05
14.5333	-2.7e-05
14.55	-0.000167
14.5667	-0.000237
14.5833	-0.000108
14.6	-0.000269
14.6167	-0.000586
14.6333	-0.000822
14.65	-0.000909
14.6667	-0.000806
14.6833	-0.000443
14.7	0.00018
14.7167	0.000566
14.7333	0.000903
14.75	0.001159
14.7667	0.001496
14.7833	0.001552
14.8	0.001458
14.8167	0.001207
14.8333	0.000656
14.85	0.000306
14.8667	0.000155
14.8833	8.4e-05
14.9	6.3e-05
14.9167	-5.6e-05
14.9333	0.000155
14.95	0.000106
14.9667	-0.000554
14.9833	-0.001303
15	-0.001803
15.0167	-0.002131
15.0333	-0.00228
15.05	-0.002469
15.0667	-0.002598
15.0833	-0.002657
15.1	-0.002717
15.1167	-0.002775
15.1333	-0.002614
15.15	-0.002352
15.1667	-0.001861
15.1833	-0.00115
15.2	-0.000369
15.2167	1.5e-05
15.2333	0.000329
15.25	0.000652
15.2667	0.001026
15.2833	0.00125
15.3	0.001263
15.3167	0.001662
15.3333	0.002011
15.35	0.00195
15.3667	0.001508
15.3833	0.000977
15.4	0.000476
15.4167	-0.000109
15.4333	-0.000773
15.45	-0.001148
15.4667	-0.001412
15.4833	-0.001806
15.5	-0.002691
15.5167	-0.002847
15.5333	-0.002043
15.55	-0.001659
15.5667	-0.001375
15.5833	-0.001151
15.6	-0.000987
15.6167	-0.000692
15.6333	-0.001087
15.65	-0.001422
15.6667	-0.001357
15.6833	-0.001212
15.7	-0.000866
15.7167	6.4e-05
15.7333	0.001085
15.75	0.001545
15.7667	0.001846
15.7833	0.002267
15.8	0.002427
15.8167	0.002778
15.8333	0.002928
15.85	0.002988
15.8667	0.002668
15.8833	0.002138
15.9	0.002079
15.9167	0.003301
15.9333	0.004393
15.95	0.004795
15.9667	0.004757
15.9833	0.005089
16	0.004732
16.0167	0.003426
16.0333	-0.00341
16.05	-0.013006
16.0667	-0.021512
16.0833	-0.035378
16.1	-0.049154
16.1167	-0.052529
16.1333	-0.050054
16.15	-0.039639
16.1667	-0.030064
16.1833	-0.01882
16.2	-0.010775
16.2167	-0.00359
16.2333	-0.001085
16.25	-0.00221
16.2667	-0.003865
16.2833	-0.0041
16.3	-0.004325
16.3167	-0.005141
16.3333	-0.006037
16.35	-0.006862
16.3667	-0.007128
16.3833	-0.007344
16.4	-0.00757
16.4167	-0.007838
16.4333	-0.008236
16.45	-0.008304
16.4667	-0.008121
16.4833	-0.007529
16.5	-0.006327
16.5167	-0.005507
16.5333	-0.005328
16.55	-0.004458
16.5667	-0.002849
16.5833	-0.001889
16.6	-0.00146
16.6167	-0.000364
16.6333	0.001352
16.65	0.002627
16.6667	0.001523
16.6833	0.001109
16.7	0.001945
16.7167	0.002376
16.7333	0.002477
16.75	0.001308
16.7667	-0.000591
16.7833	-0.001439
16.8	-0.002218
16.8167	-0.003013
16.8333	-0.003977
16.85	-0.005231
16.8667	-0.006706
16.8833	-0.00704
16.9	-0.007524
16.9167	-0.007875
16.9333	-0.008186
16.95	-0.008327
16.9667	-0.008428
16.9833	-0.008289
17	-0.008039
17.0167	-0.007718
17.0333	-0.007376
17.05	-0.006964
17.0667	-0.006622
17.0833	-0.006461
17.1	-0.006119
17.1167	-0.005515
17.1333	-0.004862
17.15	-0.004028
17.1667	-0.003285
17.1833	-0.002572
17.2	-0.001978
17.2167	-0.001654
17.2333	-0.00114
17.25	-0.000606
17.2667	0.000149
17.2833	0.001093
17.3	0.001777
17.3167	0.002271
17.3333	0.002645
17.35	0.003099
17.3667	0.003563
17.3833	0.003767
17.4	0.003731
17.4167	0.003403
17.4333	0.002765
17.45	0.002097
17.4667	0.001299
17.4833	0.000511
17.5	-1.6e-05
17.5167	-0.00057
17.5333	-0.001243
17.55	-0.002357
17.5667	-0.003391
17.5833	-0.003725
17.6	-0.003128
17.6167	-0.002811
17.6333	-0.002874
17.65	-0.002467
17.6667	-0.00259
17.6833	-0.003233
17.7	-0.003737
17.7167	-0.00354
17.7333	-0.004194
17.75	-0.004458
17.7667	-0.003542
17.7833	-0.003006
17.8	-0.00241
17.8167	-0.003002
17.8333	-0.004975
17.85	-0.008908
17.8667	-0.013061
17.8833	-0.012084
17.9	0.002773
17.9167	0.017857
17.9333	0.018231
17.95	0.012394
17.9667	0.004558
17.9833	0.002402
18	0.000865
18.0167	0.00077
18.0333	0.001674
18.05	0.001908
18.0667	0.001683
18.0833	0.001527
18.1	0.001382
18.1167	0.001007
18.1333	0.000783
18.15	0.000988
18.1667	0.001274
18.1833	0.00145
18.2	0.001635
18.2167	0.001901
18.2333	0.002037
18.25	0.001383
18.2667	0.000839
18.2833	-3.5e-05
18.3	-0.00077
18.3167	-0.001175
18.3333	-0.001311
18.35	-0.001387
18.3667	-0.001443
18.3833	-0.001739
18.4	-0.001904
18.4167	-0.002583
18.4333	-0.003603
18.45	-0.004972
18.4667	-0.005381
18.4833	-0.003861
18.5	-0.00142
18.5167	0.000438
18.5333	-0.000905
18.55	-0.008868
18.5667	-0.018301
18.5833	-0.025984
18.6	-0.029957
18.6167	-0.029712
18.6333	-0.027228
18.65	-0.023904
18.6667	-0.020829
18.6833	-0.019365
18.7	-0.017121
18.7167	-0.014778
18.7333	-0.013006
18.75	-0.011544
18.7667	-0.010112
18.7833	-0.0084
18.8	-0.007038
18.8167	-0.005607
18.8333	-0.004196
18.85	-0.002886
18.8667	-0.001845
18.8833	-0.000964
18.9	-0.000144
18.9167	0.000396
18.9333	0.000686
18.95	0.001106
18.9667	0.001406
18.9833	0.001486
19	0.001246
19.0167	0.000916
19.0333	0.000896
19.05	0.000736
19.0667	0.000456
19.0833	0.000235
19.1	0.000145
19.1167	0.000186
19.1333	0.000516
19.15	0.000737
19.1667	0.000707
19.1833	0.000448
19.2	0.000218
19.2167	-2e-05
19.2333	-0.000308
19.25	-0.000596
19.2667	-0.000885
19.2833	-0.001403
19.3	-0.001691
19.3167	-0.001877
19.3333	-0.001913
19.35	-0.001719
19.3667	-0.001436
19.3833	-0.000932
19.4	-0.000438
19.4167	-0.000171
19.4333	9.6e-05
19.45	0.000283
19.4667	0.00057
19.4833	0.000677
19.5	0.001004
19.5167	0.001394
19.5333	0.001825
19.55	0.001966
19.5667	0.001768
19.5833	0.001619
19.6	0.0015
19.6167	0.001385
19.6333	0.001241
19.65	0.001236
19.6667	0.001292
19.6833	0.001148
19.7	0.000784
19.7167	0.000512
19.7333	0.000581
19.75	0.000691
19.7667	0.00086
19.7833	0.001179
19.8	0.001309
19.8167	0.001169
19.8333	0.0011
19.85	0.000901
19.8667	0.000722
19.8833	0.000643
19.9	0.000854
19.9167	0.001153
19.9333	0.001523
19.95	0.001713
19.9667	0.001462
19.9833	0.001292
20	0.000942
20.0167	0.000508
20.0333	0.000322
20.05	6.7e-05
20.0667	-0.000189
20.0833	-0.000924
20.1	-0.001589
20.1167	-0.001922
20.1333	-0.002507
20.15	-0.003032
20.1667	-0.003666
20.1833	-0.004241
20.2	-0.004796
20.2167	-0.00489
20.2333	-0.004787
20.25	-0.004644
20.2667	-0.004351
20.2833	-0.004028
20.3	-0.003575
20.3167	-0.002991
20.3333	-0.00222
20.35	-0.001808
20.3667	-0.001877
20.3833	-0.001635
20.4	-0.001504
20.4167	-0.001168
20.4333	-0.001004
20.45	-0.00059
20.4667	-9.7e-05
20.4833	0.000487
20.5	0.001281
20.5167	0.002112
20.5333	0.002563
20.55	0.002854
20.5667	0.002805
20.5833	0.002486
20.6	0.002347
20.6167	0.002278
20.6333	0.00206
20.65	0.001772
20.6667	0.001774
20.6833	0.001676
20.7	0.001508
20.7167	0.001031
20.7333	0.000396
20.75	0.000271
20.7667	0.000155
20.7833	0.0001
20.8	0.000135
20.8167	7.2e-05
20.8333	0.00015
20.85	2.9e-05
20.8667	-3.3e-05
20.8833	-0.000195
20.9	-0.000187
20.9167	-5e-06
20.9333	9.7e-05
20.95	0.001029
20.9667	0.003192
20.9833	0.005254
21	0.006797
21.0167	0.005802
21.0333	0.006159
21.05	0.000266
21.0667	-0.009847
21.0833	-0.01956
21.1	-0.033313
21.1167	-0.040803
21.1333	-0.038042
21.15	-0.033501
21.1667	-0.028559
21.1833	-0.024548
21.2	-0.021717
21.2167	-0.019552
21.2333	-0.017596
21.25	-0.016041
21.2667	-0.014685
21.2833	-0.012869
21.3	-0.010723
21.3167	-0.008705
21.3333	-0.007045
21.35	-0.005464
21.3667	-0.004114
21.3833	-0.003124
21.4	-0.002324
21.4167	-0.001701
21.4333	-0.001207
21.45	-0.000772
21.4667	-0.000428
21.4833	-0.000144
21.5	9.1e-05
21.5167	0.000128
21.5333	-0.000163
21.55	-0.000635
21.5667	-0.000986
21.5833	-0.001377
21.6	-0.001839
21.6167	-0.002307
21.6333	-0.002524
21.65	-0.002612
21.6667	-0.003059
21.6833	-0.003906
21.7	-0.003613
21.7167	-0.003287
21.7333	-0.00396
21.75	-0.004563
21.7667	-0.005276
21.7833	-0.005869
21.8	-0.006302
21.8167	-0.006413
21.8333	-0.005942
21.85	-0.00496
21.8667	-0.004029
21.8833	-0.003788
21.9	-0.002667
21.9167	-0.001823
21.9333	-0.001618
21.95	-0.001483
21.9667	-0.001708
21.9833	-0.002423
22	-0.002648
22.0167	-0.00234
22.0333	-0.001581
22.05	-0.000832
22.0667	0.000198
22.0833	0.001157
22.1	0.002136
22.1167	0.003078
22.1333	0.003781
22.15	0.004244
22.1667	0.004377
22.1833	0.00412
22.2	0.003973
22.2167	0.003699
22.2333	0.003586
22.25	0.003833
22.2667	0.00431
22.2833	0.004287
22.3	0.004574
22.3167	0.004343
22.3333	0.003873
22.35	0.003304
22.3667	0.002584
22.3833	0.001675
22.4	0.000605
22.4167	-0.000384
22.4333	-0.001423
22.45	-0.002262
22.4667	-0.003161
22.4833	-0.00316
22.5	-0.002919
22.5167	-0.002799
22.5333	-0.00287
22.55	-0.002912
22.5667	-0.003013
22.5833	-0.003294
22.6	-0.003445
22.6167	-0.003588
22.6333	-0.003232
22.65	-0.002616
22.6667	-0.00214
22.6833	-0.001784
22.7	-0.001418
22.7167	-0.000833
22.7333	-0.000158
22.75	0.000398
22.7667	0.000973
22.7833	0.001208
22.8	0.001253
22.8167	0.00119
22.8333	0.001057
22.85	0.001165
22.8667	0.001312
22.8833	0.00152
22.9	0.001577
22.9167	0.001477
22.9333	0.001359
22.95	0.001171
22.9667	0.000963
22.9833	0.000825
23	0.000947
23.0167	0.001222
23.0333	0.001389
23.05	0.001457
23.0667	0.001574
23.0833	0.001562
23.1	0.001579
23.1167	0.00167
23.1333	0.001772
23.15	0.001755
23.1667	0.001788
23.1833	0.001471
23.2	0.001074
23.2167	0.000739
23.2333	0.000326
23.25	-1.8e-05
23.2667	-0.000141
23.2833	-0.000184
23.3	-0.000288
23.3167	-0.00035
23.3333	-0.000552
23.35	-0.000564
23.3667	-0.000685
23.3833	-0.001107
23.4	-0.001579
23.4167	-0.002111
23.4333	-0.002593
23.45	-0.002635
23.4667	-0.001618
23.4833	5e-05
23.5	0.002108
23.5167	0.004445
23.5333	0.002522
23.55	-0.001462
23.5667	-0.008385
23.5833	-0.017638
23.6	-0.031432
23.6167	-0.032896
23.6333	-0.029491
23.65	-0.024706
23.6667	-0.019791
23.6833	-0.016296
23.7	-0.01232
23.7167	-0.008916
23.7333	-0.006443
23.75	-0.004539
23.7667	-0.002856
23.7833	-0.001313
23.8	0.000561
23.8167	0.002493
23.8333	0.004015
23.85	0.004826
23.8667	0.005218
23.8833	0.005199
23.9	0.004901
23.9167	0.004701
23.9333	0.004511
23.95	0.00417
23.9667	0.003689
23.9833	0.003049
24	0.002188
24.0167	0.001286
24.0333	0.001263
24.05	0.00157
24.0667	0.001527
24.0833	0.001184
24.1	0.000982
24.1167	0.000797
24.1333	0.000442
24.15	0.000326
24.1667	0.000501
24.1833	0.000845
24.2	0.001349
24.2167	0.001923
24.2333	0.002574
24.25	0.003176
24.2667	0.003697
24.2833	0.004509
24.3	0.005151
24.3167	0.005601
24.3333	0.00585
24.35	0.006048
24.3667	0.006507
24.3833	0.007095
24.4	0.007564
24.4167	0.007951
24.4333	0.007957
24.45	0.007842
24.4667	0.007887
24.4833	0.008123
24.5	0.008138
24.5167	0.008242
24.5333	0.008614
24.55	0.009106
24.5667	0.009348
24.5833	0.009459
24.6	0.009501
24.6167	0.009282
24.6333	0.00938
24.65	0.009418
24.6667	0.009466
24.6833	0.009544
24.7	0.009673
24.7167	0.009679
24.7333	0.009833
24.75	0.009978
24.7667	0.010092
24.7833	0.009926
24.8	0.009831
24.8167	0.009313
24.8333	0.008633
24.85	0.007923
24.8667	0.007014
24.8833	0.006204
24.9	0.005794
24.9167	0.005192
24.9333	0.003978
24.95	0.003414
24.9667	0.00343
24.9833	0.002945
25	0.003971
25.0167	0.003265
25.0333	0.001926
25.05	0.001158
25.0667	0.001149
25.0833	0.0027
25.1	0.005351
25.1167	0.00885
25.1333	0.010907
25.15	0.010583
25.1667	0.00982
25.1833	0.008726
25.2	0.009333
25.2167	0.008967
25.2333	0.007798
25.25	0.00767
25.2667	0.007771
25.2833	0.007343
25.3	0.006454
25.3167	0.006383
25.3333	0.005089
25.35	0.004115
25.3667	0.004402
25.3833	0.005148
25.4	0.005534
25.4167	0.005668
25.4333	0.005719
25.45	0.005829
25.4667	0.00633
25.4833	0.007171
25.5	0.008141
25.5167	0.00887
25.5333	0.009265
25.55	0.00958
25.5667	0.009895
25.5833	0.01032
25.6	0.010705
25.6167	0.010927
25.6333	0.011036
25.65	0.010926
25.6667	0.010815
25.6833	0.010444
25.7	0.009733
25.7167	0.009339
25.7333	0.008602
25.75	0.007965
25.7667	0.007088
25.7833	0.006081
25.8	0.005194
25.8167	0.004345
25.8333	0.003551
25.85	0.002488
25.8667	0.002555
25.8833	0.002361
25.9	0.000708
25.9167	-0.001068
25.9333	-0.002678
25.95	-0.003078
25.9667	-0.002068
25.9833	0.000132
26	0.002882
26.0167	0.002269
26.0333	-0.002128
26.05	-0.005904
26.0667	-0.009881
26.0833	-0.012517
26.1	-0.012044
26.1167	-0.009692
26.1333	-0.009935
26.15	-0.009587
26.1667	-0.005699
26.1833	0.000558
26.2	0.005316
26.2167	0.006852
26.2333	0.007584
26.25	0.007537
26.2667	0.007079
26.2833	0.006442
26.3	0.005664
26.3167	0.005395
26.3333	0.005703
26.35	0.006321
26.3667	0.006559
26.3833	0.006237
26.4	0.005705
26.4167	0.005202
26.4333	0.004976
26.45	0.004701
26.4667	0.004525
26.4833	0.004399
26.5	0.004183
26.5167	0.003916
26.5333	0.003808
26.55	0.003659
26.5667	0.00365
26.5833	0.003951
26.6	0.004332
26.6167	0.004812
26.6333	0.005171
26.65	0.00553
26.6667	0.005748
26.6833	0.005637
26.7	0.005516
26.7167	0.005404
26.7333	0.005631
26.75	0.006018
26.7667	0.005974
26.7833	0.005831
26.8	0.005648
26.8167	0.005565
26.8333	0.005471
26.85	0.005306
26.8667	0.004952
26.8833	0.004538
26.9	0.004314
26.9167	0.003659
26.9333	0.003085
26.95	0.00271
26.9667	0.002305
26.9833	0.001791
27	0.001256
27.0167	0.001122
27.0333	0.001477
27.05	0.001513
27.0667	0.001258
27.0833	0.000904
27.1	0.00071
27.1167	0.000596
27.1333	0.000462
27.15	0.000299
27.1667	0.000505
27.1833	0.001032
27.2	0.001638
27.2167	0.002315
27.2333	0.002663
27.25	0.003111
27.2667	0.00349
27.2833	0.003818
27.3	0.004046
27.3167	0.004145
27.3333	0.004185
27.35	0.004035
27.3667	0.003926
27.3833	0.003896
27.4	0.003907
27.4167	0.003868
27.4333	0.004011
27.45	0.003984
27.4667	0.004088
27.4833	0.004141
27.5	0.003804
27.5167	0.003309
27.5333	0.002956
27.55	0.002713
27.5667	0.00282
27.5833	0.003017
27.6	0.003033
27.6167	0.002782
27.6333	0.002493
27.65	0.002184
27.6667	0.001825
27.6833	0.001477
27.7	0.000928
27.7167	0.00038
27.7333	-0.000253
27.75	-0.000787
27.7667	-0.000901
27.7833	-0.000665
27.8	-0.000269
27.8167	-4.1e-05
27.8333	0.000381
27.85	0.000523
27.8667	0.000374
27.8833	-0.000394
27.9	-0.000912
27.9167	-0.000878
27.9333	-0.00029
27.95	-0.001542
27.9667	-0.002824
27.9833	-0.002656
28	-0.001538
28.0167	-0.001538
28.0333	-0.002513
28.05	-0.003638
28.0667	-0.004133
28.0833	-0.003908
28.1	-0.003692
28.1167	-0.003995
28.1333	-0.004573
28.15	-0.00498
28.1667	-0.005137
28.1833	-0.005294
28.2	-0.004692
28.2167	-0.003767
28.2333	-0.002856
28.25	-0.001895
28.2667	-0.001184
28.2833	-0.000702
28.3	-0.000341
28.3167	0.000152
28.3333	0.000562
28.35	0.001092
28.3667	0.001392
28.3833	0.001762
28.4	0.001992
28.4167	0.002425
28.4333	0.002544
28.45	0.002264
28.4667	0.001423
28.4833	-0.000698
28.5	-0.001738
28.5167	-0.001567
28.5333	0.000222
28.55	-0.00335
28.5667	-0.009012
28.5833	-0.018204
28.6	-0.026576
28.6167	-0.027286
28.6333	-0.024031
28.65	-0.020975
28.6667	-0.019269
28.6833	-0.016494
28.7	-0.013608
28.7167	-0.011401
28.7333	-0.01009
28.75	-0.009098
28.7667	-0.007166
28.7833	-0.006695
28.8	-0.006453
28.8167	-0.00523
28.8333	-0.004103
28.85	-0.003457
28.8667	-0.00315
28.8833	-0.002743
28.9	-0.002287
28.9167	-0.001979
28.9333	-0.001759
28.95	-0.001728
28.9667	-0.001978
28.9833	-0.001668
29	-0.001467
29.0167	-0.000916
29.0333	-0.000293
29.05	0.000399
29.0667	0.001102
29.0833	0.001695
29.1	0.001968
29.1167	0.001921
29.1333	0.002205
29.15	0.002669
29.1667	0.003363
29.1833	0.003848
29.2	0.004382
29.2167	0.004806
29.2333	0.00417
29.25	0.001214
29.2667	-0.002252
29.2833	-0.003228
29.3	-0.002324
29.3167	-0.00133
29.3333	-0.001147
29.35	-0.002734
29.3667	-0.003471
29.3833	-0.002618
29.4	-0.001296
29.4167	-0.000643
29.4333	0.000227
29.45	0.001588
29.4667	0.002818
29.4833	0.003868
29.5	0.004109
29.5167	0.004228
29.5333	0.003695
29.55	0.002862
29.5667	0.002678
29.5833	0.002995
29.6	0.003182
29.6167	0.003418
29.6333	0.004079
29.65	0.004391
29.6667	0.004453
29.6833	0.003854
29.7	0.003136
29.7167	0.002537
29.7333	0.002252
29.75	0.001888
29.7667	0.001963
29.7833	0.001889
29.8	0.001774
29.8167	0.001889
29.8333	0.001947
29.85	0.001655
29.8667	0.001243
29.8833	0.000961
29.9	0.000329
29.9167	-0.000364
29.9333	-0.001095
29.95	-0.001725
29.9667	-0.002046
29.9833	-0.002526
30	-0.003537
30.0167	-0.003409
30.0333	-0.003589
30.05	-0.00394
30.0667	-0.0033
30.0833	-0.00256
30.1	-0.00231
30.1167	-0.002472
30.1333	-0.002992
30.15	-0.003451
30.1667	-0.002721
30.1833	-0.00205
30.2	-0.002429
30.2167	-0.00254
30.2333	-0.002395
30.25	-0.002441
30.2667	-0.002376
30.2833	-0.001942
30.3	-0.001337
30.3167	-0.000603
30.3333	7.1e-05
30.35	0.000505
30.3667	0.000678
30.3833	0.000922
30.4	0.001296
30.4167	0.00152
30.4333	0.001819
30.45	0.002328
30.4667	0.002897
30.4833	0.003486
30.5	0.004035
30.5167	0.004585
30.5333	0.004473
30.55	0.004392
30.5667	0.00444
30.5833	0.004488
30.6	0.004437
30.6167	0.004057
30.6333	0.003566
30.65	0.003105
30.6667	0.002754
30.6833	0.002043
30.7	0.001592
30.7167	0.001231
30.7333	0.000689
30.75	0.000216
30.7667	-4.7e-05
30.7833	-0.00039
30.8	-0.000723
30.8167	-0.001195
30.8333	-0.001633
30.85	-0.001902
30.8667	-0.00183
30.8833	-0.001938
30.9	-0.002246
30.9167	-0.002105
30.9333	-0.001821
30.95	-0.001877
30.9667	-0.002074
30.9833	-0.00256
31	-0.003406
31.0167	-0.003152
31.0333	-0.001028
31.05	-0.000224
31.0667	-0.00589
31.0833	-0.012535
31.1	-0.017531
31.1167	-0.017807
31.1333	-0.016362
31.15	-0.014308
31.1667	-0.012434
31.1833	-0.01111
31.2	-0.009885
31.2167	-0.009721
31.2333	-0.009168
31.25	-0.007805
31.2667	-0.006311
31.2833	-0.004598
31.3	-0.003015
31.3167	-0.001431
31.3333	-0.00014
31.35	0.001162
31.3667	0.002174
31.3833	0.002786
31.4	0.003757
31.4167	0.004079
31.4333	0.003608
31.45	0.003018
31.4667	0.002767
31.4833	0.002996
31.5	0.003216
31.5167	0.003335
31.5333	0.003791
31.55	0.004097
31.5667	0.004063
31.5833	0.003659
31.6	0.002795
31.6167	0.002011
31.6333	0.001404
31.65	0.000766
31.6667	0.000858
31.6833	0.00151
31.7	0.001633
31.7167	0.002115
31.7333	0.002902
31.75	0.00331
31.7667	0.003727
31.7833	0.003705
31.8	0.003973
31.8167	0.0041
31.8333	0.003712
31.85	0.002924
31.8667	0.002416
31.8833	0.003328
31.9	0.00367
31.9167	0.003922
31.9333	0.004128
31.95	0.003694
31.9667	0.00334
31.9833	0.003126
32	0.002022
32.0167	0.000668
32.0333	-0.000613
32.05	-0.001535
32.0667	-0.002096
32.0833	-0.002277
32.1	-0.002398
32.1167	-0.002509
32.1333	-0.002458
32.15	-0.002057
32.1667	-0.001995
32.1833	-0.002274
32.2	-0.002533
32.2167	-0.002682
32.2333	-0.002859
32.25	-0.002926
32.2667	-0.002883
32.2833	-0.00225
32.3	-0.001557
32.3167	-0.000894
32.3333	-0.000107
32.35	0.000699
32.3667	0.001305
32.3833	0.001952
32.4	0.002508
32.4167	0.002764
32.4333	0.002735
32.45	0.002687
32.4667	0.002558
32.4833	0.002429
32.5	0.00229
32.5167	0.002112
32.5333	0.001568
32.55	0.001225
32.5667	0.000921
32.5833	0.000287
32.6	4e-06
32.6167	-0.00038
32.6333	-0.00106
32.65	-0.00161
32.6667	-0.002319
32.6833	-0.003019
32.7	-0.003599
32.7167	-0.004529
32.7333	-0.004946
32.75	-0.004523
32.7667	-0.00401
32.7833	-0.003487
32.8	-0.003155
32.8167	-0.002652
32.8333	-0.002334
32.85	-0.001855
32.8667	-0.001107
32.8833	-0.000889
32.9	-0.000631
32.9167	-4.3e-05
32.9333	0.000354
32.95	0.000662
32.9667	0.0009
32.9833	0.001168
33	0.001635
33.0167	0.002173
33.0333	0.002695
33.05	0.003018
33.0667	0.00301
33.0833	0.002962
33.1	0.002724
33.1167	0.002297
33.1333	0.001936
33.15	0.001746
33.1667	0.001656
33.1833	0.001436
33.2	0.001255
33.2167	0.001135
33.2333	0.001013
33.25	0.000972
33.2667	0.00079
33.2833	0.000619
33.3	0.000517
33.3167	0.000535
33.3333	0.000602
33.35	0.000379
33.3667	7.6e-05
[truncated: 910 more rows]
