# Supplementary material for: NirD curtails the stringent response by inhibiting RelA activity in Escherichia coli
Source: eLife. 2021 Jul 29;10:e64092. doi: 10.7554/eLife.64092 (PMC8321558; doi:10.7554/eLife.64092)
Supplement: Figure 6—source data 2. — The amount of pppGpp was normalized to total amount of G nucleotides observed in each sample. Total G is the sum of GTP and pppGpp detected. The source data are provided for the relative levels of pppGpp in Figure 6B, which are represented as the means and SDs of three independent experiments. [file elife-64092-fig6-data2.xlsx]

## Sheet: Figure 6–source data 2
Figure 6–source data 2. Quantification of (p)ppGpp
		RelAN-terminal							RelAN-terminal + NirD							RelAN-terminal + NirDE50K
		0	5	10	15	30	45	60	0	5	10	15	30	45	60	0	5	10	15	30	45	60
Replica 1	GTP	36295.8	28421.4	25698.4	25343.2	19068.7	14569.2	12355.6	36295.8	36677.2	35432.3	31387.1	28100.4	29643.3	26075.7	36295.8	32404.3	28215.2	25309.1	18629.1	17239.7	15457.8
	pppGpp	113.93	5390.61	9881	14124.9	20530.1	22591.8	27697.4	113.93	457.02	997.28	2056.07	4869.5	8017.11	10331	113.93	4542.29	8720.26	11230.2	15801.9	20933.1	25228.2
	Blank	113.93	113.93	113.93	113.93	113.93	113.93	113.93	113.93	113.93	113.93	113.93	113.93	113.93	113.93	113.93	113.93	113.93	113.93	113.93	113.93	113.93
Replica 2	GTP	4402.18	4119.66	3458.85	3069.77	1831.88	1726.46	1546.72	4402.18	5278.65	4965.82	4526.21	4601.63	4266.58	4392.62	4402.18	4602.61	4404.22	3966.65	3072.91	2530.76	2238.11
	pppGpp	9.77	670.21	1174.05	1447.99	1703.41	2410.5	3121.92	9.77	48.52	107.37	243.85	653.54	968.99	1459.58	9.77	552.09	1147.67	1494.88	2194.22	2787	3389.7
	Blank	9.77	9.77	9.77	9.77	9.77	9.77	9.77	9.77	9.77	9.77	9.77	9.77	9.77	9.77	9.77	9.77	9.77	9.77	9.77	9.77	9.77
Replica 3	GTP	5435.04	4092.15	4113.52	3894.56	3017.77	2217.1	1817.63	5435.04	5338.57	5221.12	4904.01	4582.01	4347.91	4237.07	5435.04	5054.75	4496.55	3938.27	3038.52	2741.43	2341.01
	pppGpp	10.51	630.6	1304.27	1772.76	2760.95	3017	3603.11	10.51	49.56	114.73	262.46	642.02	1011.07	1455.25	10.51	594.16	1127.74	1472.58	2185.06	2900.28	3378.97
	Blank	10.51	10.51	10.51	10.51	10.51	10.51	10.51	10.51	10.51	10.51	10.51	10.51	10.51	10.51	10.51	10.51	10.51	10.51	10.51	10.51	10.51
pppGpp / Total G =(pppGpp-Blank)/((GTP-Blank)+(pppGpp-Blank))
		RelAN-terminal							RelAN-terminal + NirD							RelAN-terminal + NirDE50K
		0	5	10	15	30	45	60	0	5	10	15	30	45	60	0	5	10	15	30	45	60
Replica 1	pppGpp / Total G	0	0.157118	0.276284	0.357055	0.51856	0.608609	0.692614	0	0.00929623	0.0244008	0.0584712	0.145244	0.211131	0.282404	0	0.120602	0.234456	0.306136	0.458671	0.548668	0.620747
Replica 2	pppGpp / Total G	0	0.138447	0.252371	0.319731	0.481729	0.583067	0.669409	0	0.00730081	0.0193128	0.0492746	0.122959	0.183898	0.248568	0	0.105609	0.205681	0.272898	0.416277	0.524182	0.602669
Replica 3	pppGpp / Total G	0	0.131885	0.239729	0.312107	0.477698	0.57672	0.665331	0	0.0072758	0.0196093	0.0489656	0.121374	0.187442	0.254746	0	0.103707	0.199389	0.271265	0.417977	0.514131	0.591066
Means
		RelAN-terminal							RelAN-terminal + NirD							RelAN-terminal + NirDE50K
		0	5	10	15	30	45	60	0	5	10	15	30	45	60	0	5	10	15	30	45	60
	pppGpp / Total G	0	0.142484	0.256128	0.329631	0.492662	0.589465	0.675785	0	0.00795761	0.0211076	0.0522371	0.129859	0.194157	0.261906	0	0.109973	0.213175	0.283433	0.430975	0.528993	0.604827
SDs
		RelAN-terminal							RelAN-terminal + NirD							RelAN-terminal + NirDE50K
		0	5	10	15	30	45	60	0	5	10	15	30	45	60	0	5	10	15	30	45	60
	pppGpp / Total G	0	0.0130915	0.0185651	0.0240541	0.0225184	0.0168797	0.0147167	0	0.00115935	0.00285582	0.00540109	0.013347	0.0148063	0.0180188	0	0.00925435	0.0186963	0.0196786	0.0240003	0.0177642	0.0149576
