# Supplementary material for: NirD curtails the stringent response by inhibiting RelA activity in Escherichia coli
Source: eLife. 2021 Jul 29;10:e64092. doi: 10.7554/eLife.64092 (PMC8321558; doi:10.7554/eLife.64092)
Supplement: Figure 6—source data 3. — The relative initial velocity was estimated on the linear part of the in vitro pppGpp formation by linear regression at the very beginning of the reaction. The source data are provided for the results in Figure 6C, which are represented as the means and SDs of three experiments. [file elife-64092-fig6-data3.xlsx]

## Sheet: Figure 6–source data 3
Figure 6–source data 3. Determination of the relative initial velocity
GTP average intensity
Molar ratio of NirD to 1 µM RelA	0					0.5					1					2					4					8					16
Time (seconds)	30	60	90	120	150	30	60	90	120	150	30	60	90	120	150	30	60	90	120	150	30	60	90	120	150	30	60	90	120	150	30	60	90	120	150
Replica 1	68.17	94.71	128.59	150.83	182.57	60.31	90.21	121.46	143.19	172.96	50.45	58.84	73.07	94.28	114.78	15.93	23.33	29.81	40.77	48.44	45.67	51.07	54.83	63.12	70.67	45.77	46.99	50.07	52.23	53.52	11.59	11.54	12.25	11.43	14.56
Replica 2	31.23	64.94	92.59	112.17	142.28	31.18	57.26	79.19	100.91	133.78	22.22	29.66	40.43	60.49	69.8	15.49	22.42	32.67	41.96	53.72	8.41	11.47	16.22	20.14	27.3	8.34	8.88	10.57	11.48	12.43	9.04	9.82	9.45	11.28	11.19
Replica 3	34.4	68.05	97.14	121.98	154.09	32.2	58.73	78.89	105.87	138.01	21.46	32.52	39.6	58.19	81.56	16.19	23.12	36.84	52.59	67.47	18.23	21.43	24.31	33.55	37.59	11.03	10.87	13.11	15.9	16.97	8.29	9.46	12.19	12.85	12.13
					Slope [Δ(GTP average intensity)/ΔTime]											Slope [Δ(GTP average intensity)/ΔTime]												Slope [Δ(GTP average intensity)/ΔTime]
						Slope	R2										Slope	R2											Slope	R2
					0	0.9497	0.9971									0	0.8978	0.9931										0	0.9777	0.9977
					0.5	0.9276	0.9971									0.5	0.8295	0.9941										0.5	0.8625	0.9941
					1	0.547	0.9729									1	0.42	0.9745										1	0.4862	0.9517
					2	0.2749	0.9929									2	0.32	0.9932										2	0.4401	0.9837
					4	0.2068	0.9808									4	0.1548	0.9785										4	0.1695	0.9565
					8	0.0691	0.9794									8	0.0359	0.9805										8	0.0564	0.9241
					16	0.0194	0.4894									16	0.0192	0.792										16	0.0369	0.7741
=Slope/Slope(0)
	Molar ratio of NirD to 1 µM RelA
	0	0.5	1	2	4	8	16
Replica 1	1.00846	0.984992	0.580844	0.291909	0.219595	0.0733753	0.0206003
Replica 2	0.953348	0.880823	0.445986	0.339799	0.164378	0.0381212	0.0203879
Replica 3	1.03819	0.915864	0.516282	0.46733	0.179987	0.0598896	0.0391831
Means
	Molar ratio of NirD to 1 µM RelA
	0	0.5	1	2	4	8	16
	1	0.927226	0.514371	0.366346	0.187987	0.0571287	0.0267238
SDs
	Molar ratio of NirD to 1 µM RelA
	0	0.5	1	2	4	8	16
	0.0430497	0.0530061	0.0674492	0.0906736	0.0284646	0.0177885	0.0107906
